# Supplementary material for: Meta-Analysis of EMT Datasets Reveals Different Types of EMT
Source: PLoS One. 2016 Jun 3;11(6):e0156839. doi: 10.1371/journal.pone.0156839 (PMC4892621; doi:10.1371/journal.pone.0156839)
Supplement: S3 Table — 17 mouse microarray datasets were merged under the official gene symbols provided by MGI. Experiment with treatment and its corresponding control were considered as one EMT-induction pair, and the log2 values of the gene expression ratio in this EMT-induction pair were applied in the analysis. 31 mouse EMT-induction pairs were listed in the table. (XLSX) [file pone.0156839.s003.xlsx]

## Sheet: Sheet1
			log2 of ratios (induced-EMT vs control)
			1	2	3	4	5	6	7	8	9	10	11	12	13	14	15	16	17	18	19	20	21	22	23	24	25	26	27	28	29	30	31
			GSE28184	GSE31359	GSE31359	GSE31359	GSE31359	GSE32904	GSE40466	GSE40466	GSE44050	GSE44050	GSE44055	GSE48859	GSE48859	GSE48859	GSE48859	GSE49451	GSE49451	GSE49073	GSE49073	GSE50002	GSE54491	GSE54716	GSE54716	GSE55710	GSE59922	GSE54715	GSE54715	GSE48204	GSE48204	GSE50887	GSE50887
			NMuMG	EpH4	mRrox	MCT	NMuMG	Mammary Epthelial Cells	NMuMG	NMuMG			GIF14	Keratinocytes	Keratinocytes	Keratinocytes	Keratinocytes	NMuMG	NMuMG	NMuMG	NMuMG	MycCap prostate Cancer	NMuMG	NMuMG	NMuMG	Py2T	EpRas	Nm18	Nm18	NMuMG	NMuMG	4T1	4T1
Official Symbol	Relative Expression									Poly	consi	Sox4si		CD34-	CD34+	Mts-	Mts+	consi	klf4si	Control	Major			Control	enriched							Snail+FB/con	Snail/con
42064	0.234387	0.967742	0.267305	-0.275298	0.9888	-0.271917	1.33139	1.56384	0.484623	0.0806312	0.0258868	-0.24592		0.0509208	-0.0351803	-0.0607119	-0.32259	-0.04198	-0.136237	0.190157	0.0830234	-0.00309166	-0.023129	-0.203333	0.13	-0.0496799	0.223333	0.0843484	-0.035363	-0.0456254	-0.00631521	-0.2655	0.0245
42065	1.95359	1	-0.372961	-0.467666	-0.297222	2.02642	0.0153016	-0.783961	-0.31109	-0.225364	-0.178864	0.180826	-0.0925496	-0.101707	0.176605	-0.181291	0.102321	-0.190026	-0.444756	0.150569	0.461631	0.379416	0.382604	-0.0733333	-0.29	-0.305814	-0.566667	0.00603318	0.231742	-1.45339	-0.273467	-0.015	-0.382
42066	0.119962	0.419355	0.16081	0.500377	-0.0426556	-0.398926	-0.643487	-0.545283	0.561782	0.0759093													-0.4515			-0.270566	-0.193333			0.0986747	0.327826
42067	0.0722537	0.387097		0.138828	-0.847997	1.078	2.1375	-0.158813	0.11	-0.24													0.0634003			0.173111	0.136667			-0.0630774	0.0116546
42068	2.40317	0.483871		-0.275653	0.0315923	-0.0647168	0.348333	-0.682779	0.0549087	0.630688			0.387789										-0.216573	-0.0966667	-0.14	0.035126	0.0833333			0.0342479	-0.208905
42069	1.97707	0.451613	-0.124084	-0.319682	-0.534973	-0.284702	0.297225	-0.666792	-0.142469	0.244795			-0.51483										-0.236182			0.305052	0.183333			-0.195042	0.0664037
42070	1.36137	0.516129	-0.237003	-0.860865	-0.735672	-0.0899173	-0.352215	-0.618029	-0.511878	0.126334			-0.0196617										-0.292426	-0.03	0.07	-0.0520806	-0.00333333			0.116423	0.325955
42071	1.61495	0.419355	-0.12335	-0.327837	-0.687434	-0.673339	0.685142	-1.18426	-1.095	0.88													0.504353			-0.0898259	-0.0933333			-0.135143	0.597171
42072	0.398581	0.387097		0.167265	-0.24663	-0.198139	0.43308	-1.43336	-0.19669	-1.1935													0.0889575			-0.929926	-0.126667			-0.778668	-0.208175
42073	0.115487	0.419355	0.319453	-0.222509	1.4261	0.886938	0.459432	0.00327751	0.803952	0.203249													-0.033629			0.042622	0.0466667			0.0579732	-0.0551343
42074	0.055302	0.419355	0.426791	0.36257	0.241008	1.9823	2.59418	1.38963	0.45	0.165													0.0316406			0.0214692	-0.0466667			-0.0352945	-0.121711
42248	0.150046	0.483871	0.49288	0.659824	-0.549636	-0.182668	0.194757	0.2712	0.575	-0.43													-0.0537994	-0.09	-0.12	0.0285712	0.03			0.0191419	-0.224157
42249	3.42173	0.419355	0.189102	-0.335334	0.0878369	-0.602958	0.915558	-0.0159566	-1.1043	0.720043													0.155108			-0.0936437	0.173333			0.306147	-0.118951
42250	0.423555	0.483871	0.312351	-0.947605	0.127976	-0.392354	-0.00235622	0.259528	0.21901	-0.118071													0.00605759	0.186667	-0.226667	0.107884	0.0966667			0.0549395	-0.0046936
42251	0.299373	0.483871	-0.028226	0.0795585	-2.347	-1.03804	0.00689297	2.34163	-1.33888	-0.309136													0.293694	-0.03	0.0266667	-0.198149	-0.253333			-0.559428	-0.528759
42252	0.519922	0.129032	1.1661																				0.0505496			0.920205	0.0266667
42253	0.619356	0.483871	0.431559	-0.456945	0.0609316	1.05332	0.613936	0.213493	-0.319786	0.472279													-0.500435	0.0866667	-0.0266667	1.06108	0.556667			0.451876	0.127355
42254	3.34371	0.483871	0.108575	-0.532743	0.0390332	-0.115583	0.982743	-0.124591	-1.34282	0.333203													-0.155561	0.156667	0.03	0.261747	0.1			-0.0251643	-0.301354
42255	1.25679	0.483871	0.1147	-0.137077	0.172455	-0.151567	0.236254	0.563371	-0.409841	0.590427													-0.126762	0.0666667	0.09	-0.144749	-0.15			0.0561352	0.692065
42256	3.00353	0.483871	0.557838	-1.06274	-0.202529	0.719653	0.848473	2.30521	-1.44	0.005													0.0680318	-0.333333	-0.44	0.672037	0.35			0.755549	0.239714
42257	1.01964	0.483871	-0.529354	-0.0295507	0.32234	-0.0189656	0.596381	-0.201224	-1.17618	1.15276													0.110153	0.0666667	0.133333	0.254831	0.00333333			0.545208	0.587929
42258	4.00008	0.419355	0.322462	-0.191511	-0.274362	-0.0538782	0.583184	0.627595	-1.25758	-0.0817282													-0.06156			0.374037	0.12			1.18327	0.0726942
42259	0.0411858	0.451613	-0.129468	0.028759	-0.674655	-1.35869	0.676964	0.046098	0.393854	-0.265649			0.145522										-0.060017			-0.0804426	-0.02			-0.0275913	-0.0852155
42261	0.0367787	0.387097		1.64186	-0.762388	-0.791413	0.0995357	-0.161253	0.485	0.01													-0.120285			0.0372603	-0.12			-0.00323677	-0.0596647
42262	3.9516	0.483871	-0.0333613	-0.931172	0.209063	-0.148341	0.00775285	-0.115745	-0.118369	0.138425													0.0596473	0.37	0.136667	-0.0341058	0.106667			-0.110118	-0.0761084
0610007P14Rik	3.42217	1	-0.0997715	-0.375603	0.0522675	-0.494138	0.328028	-1.79631	-0.525	-0.66	-0.190049	0.138918	-0.182207	-0.289061	-0.0904806	-0.211932	0.0814334	0.120659	-0.2068	-0.0992224	-0.24422	-0.309991	0.0362362	-0.213333	-0.496667	-0.414956	-0.193333	-0.606268	-1.30882	-0.137921	-0.470156	0.103	-0.115
0610009B22Rik	1.89167	1	-0.274006	-0.426987	-0.119373	-0.446957	0.173637	-0.897223	-1.85	1.495	0.0861241	-0.066601	-0.0708296	-0.000698876	-0.350172	0.270586	-0.063675	-0.340357	-0.0676933	-0.00303061	-0.151839	-0.0146194	0.515562	0.01	-0.246667	0.0580143	-0.183333	-0.163058	-0.0911156	-0.048214	0.0355563	-0.063	0.08
0610009L18Rik	0.365682	0.741935		-0.0851674	-0.0640851	0.143836	0.527767	0.104983	1.695	1.29	-0.196972	-0.345682		0.241661	-0.0791437	-0.156245	-0.19642	-0.047646	0.0540177	0.14343	0.120613		0.0446591			0.0814287				0.203314	0.431563	-0.0515	0.1745
0610009O20Rik	0.706738	1	-0.814877	-0.48783	0.0151452	-0.171522	0.581682	-0.488961	0.810591	-0.469834	-0.372838	-0.312032	-0.164955	-0.18122	-0.204594	-0.0833194	-0.251366	-0.114774	0.0704605	-0.112285	-0.258099	0.00408608	-0.158041	-0.0833333	-0.35	-0.24462	-0.213333	-0.493378	-0.339554	-0.0801271	0.163379	-0.033	-0.228
0610010F05Rik	0.860539	0.83871	-0.488064	-0.272073	0.187142	0.0720618	0.546704	-0.453602	-1.42204	1.46911	0.300268	0.26584		-0.157066	0.392357	-0.146199	0.306934	0.135167	-0.0889512	-0.0348384	-0.233	-0.234702	-0.0404051			-0.0220314	0.473333			-0.425953	-0.862367	-0.3275	-0.377
0610010K14Rik	1.49192	1	-0.364834	-0.533677	0.762617	-0.211881	0.419345	0.413983	1.14515	0.366018	-0.181698	0.0838834	0.0325693	-0.359479	-0.766422	-0.182012	-0.189777	-0.128797	-0.202082	-0.0232336	0.157741	-0.341557	-0.121173	-0.33	0.0233333	-0.0566429	-0.06	-0.622479	-0.403366	-0.352905	-0.64637	-0.215	-0.5315
0610011F06Rik	1.58841	0.83871	-1.25951	-0.216266	0.139497	-0.888887	-0.0406597	-1.5428	0.375009	-0.825276	-0.460887	-0.223751		-0.201387	-0.365078	-0.111041	0.105549	-0.301242	-0.261808	-0.319048	-0.339298	0.282603	0.435728			-0.102779	-0.216667			-1.20296	-0.164281	0.116	-1.285
0610030E20Rik	0.730189	0.806452		-0.484911	-0.633497	0.0544027	-0.090775	-0.177334	-0.206117	-0.740283	-0.353342	0.0287721		-0.222076	-0.234046	-0.0695107	-0.130539	0.0715949	0.269721	0.0675737	-0.268498	0.192765	-0.0564852			-0.184466	-0.126667			-0.0507212	0.0129554	-0.0555	-0.179
0610037L13Rik	0.755595	1	-0.272783	-0.443251	-0.0308559	-0.0262676	-0.0204999	0.461927	0.449679	-0.149525	-0.160957	-0.0685749	0.22391	0.00202546	-0.0385296	-0.118873	0.0565401	-0.478341	-0.4014	0.0371253	0.224231	-0.0323626	-0.273177	0.0233333	-0.0466667	0.032033	0.136667	0.0110518	-0.123062	0.264645	-0.13797	0.035	-0.149
0610040J01Rik	0.589503	1	-1.09818	-0.537633	0	-2.87915	-2.80145	-3.94818	0.82	0.085	-0.314586	-0.296427	-0.523298	0.389127	-0.0957395	-0.209827	-0.231807	0.310765	-0.0293644	-0.805363	-0.605299	0.0111717	0.49036	-0.123333	-0.366667	0.0719973	0.03	-0.591515	-0.392098	-1.61944	0.152991	0.18	0.412
1110001J03Rik	1.06852	1	-1.27946	-0.422855	-0.217782	-0.532085	0.137452	-0.32901	1.585	-0.845	-0.240223	0.0676645	-0.208662	-0.114483	-0.303346	0.396987	0.854302	0.0306087	-0.197701	-0.181216	0.0117672	0.460984	0.0960366	-0.423333	-0.32	0.182515	-0.0933333	-0.460202	-1.02499	-0.288208	-0.473354	0.039	-0.455
1110002E22Rik	0.273756	0.354839		-0.700203	0.32234	-1.08542	-0.982564	0.354636	-0.567031	0.214076																				-1.41236	-0.930674	0.054	-1.391
1110002L01Rik	0.487746	0.741935		-0.365304	0.0633259	0.874267	0.572709	-0.174393	-0.805	0.4	0.803632	0.435		0.393072	0.0802313	0.11502	0.0525585	-0.510061	-0.0655113	0.0550495	-0.0841998	0.100855	-0.375111			0.664408	0.563333			0.775903	-0.106982
1110004E09Rik	0.67418	1	-0.590054	-0.599709	-0.0210172	-0.308094	0.665098	-0.487701	-0.160198	-0.0168219	-0.280603	-0.0892565	-0.0536876	-0.331261	0.00763791	0.0869787	0.154388	-0.26995	-0.107877	-0.308978	-0.0243686	-0.367925	0.0436894	-0.1	0.0733333	-0.631007	-0.246667	-0.415962	-0.414127	-0.273551	-0.402187	0.05	-0.438
1110004F10Rik	2.50069	1	-0.36183	-0.3723	-0.155757	-0.281763	0.23329	-0.69158	-2.62	-0.195	-0.0829917	-0.0885221	0.0235935	-0.0927263	0.0990282	0.186645	0.267024	-0.0337221	-0.234671	-0.0698765	0.0632156	-0.339153	0.0399506	0.443333	0.163333	0.118305	-0.14	-0.229996	-0.482711	-0.537131	-0.820442	-0.324	-0.264
1110007C09Rik	2.00344	1	-0.948053	-0.461707	-0.243693	-0.442612	-0.394289	0.979725	1.245	1.265	0.150254	0.273889	-0.0239095	-0.181722	-0.377222	-0.176995	-0.199234	0.0334353	-0.323706	-0.00559644	0.0195997	0.13141	-0.0129365	0.03	-0.0733333	-0.124815	-0.363333	0.0469903	1.04471	-0.96812	-0.293286	0.246	0.639
1110008F13Rik	3.84631	0.967742	-0.0431576	-0.34151	-0.0797358	-0.212767	0.863085	-0.441782	0.18998	-0.130837	0.0120472	-0.064011	-0.0316398	-0.0992138	-0.112831	0.104058	0.148349	0.217468	0.272668	-0.0315504	0.190083	-0.231119	-0.0550753	0.196667	-0.0933333	0.206562		0.0921509	0.256893	-0.0943022	-0.20893	0.138	-0.347
1110008L16Rik	0.954859	0.83871	-0.43339	0.18533	-0.00436519	-0.205225	0.453512	-2.2239	0.015	0.775	0.347772	-0.0992994		-0.171054	-0.0684615	0.0263528	0.244926	0.0682217	0.130356	-0.021347	0.236182	0.555573	0.00788302			0.00668502	0.00333333			0.0984244	0.0879138	0.0935	0.035
1110008P14Rik	1.43306	1	0.0355288	-0.0988262	0.143732	-0.371543	0.25093	-1.20922	0.693045	-0.323231	0.17793	0.276507	0.187845	0.0374736	-0.166442	0.0119419	0.806036	-0.226325	-0.0681591	0.0887868	0.161029	-0.301978	0.124427	0.1	0.14	-0.118372	-0.53	0.166617	0.640013	0.405846	0.370144	0.223	0.514
1110012L19Rik	0.808364	0.870968	-0.917808	-0.34034	0.283986	0.000794217	-0.03565	-0.54752	0.735	0.24	0.132208	0.282289	-0.0707559	0.36496	0.3335	0.283346	0.463492	-0.106729	-0.254843	-0.132751	0.757681	0.386702	0.125001			-0.0681049	-0.29			0.214383	0.432172	0.019	0.672
1110017D15Rik	0.130654	0.870968	0.481272	-0.0588937	0.158698	-0.222392	0.547488	-0.0339433	0.845	0.04	-0.0912383	-0.0632892	-0.0149748	-0.0658368	-0.117183	-0.10373	-0.169155	-0.0536795	-0.0900496	0.0812528	0.0318096	0.0489575	-0.0613573			0.0722908	0.206667			0.0801587	-0.140254	0.048	0.1565
1110025L11Rik		0.0645161																														-0.507	-0.225
1110032A03Rik	0.559289	1	-0.545498	1.4619	0.447619	0.317093	0.247249	-0.787605	0.356501	1.04846	-0.196101	0.490832	-0.0087294	0.0435544	-0.0843882	-0.106994	0.149989	0.241117	0.441959	0.0645529	0.423423	0.522198	0.893485	0.0233333	-0.186667	0.193617	-0.516667	0.200377	-0.125565	-0.114749	0.35103	0.4595	0.411
1110032F04Rik	0.246676	0.806452		0.202255	-0.268088	0.717066	-0.684595	0.214876	0.240588	-0.157487	0.114046	-0.157791		0.0354977	-0.0695321	-0.152665	-0.543515	0.116157	0.0195844	0.122412	0.103068	-0.122908	0.0449225			0.0849929	0.0666667			-0.188402	-0.227995	0.797	1.009
1110034G24Rik	0.263552	0.806452		-0.185542	-0.659885	-0.336468	0.0925338	-0.877874	0.640078	-1.94973	0.134314	0.416725		0.0822885	-0.0433527	0.125375	0.407393	0.336186	-0.200333	-0.0738249	0.200584	0.123688	0.1401			0.0450028	-0.0266667			0.302816	0.480303	0.113	0.4995
1110037F02Rik	0.888791	0.967742	-0.405786	-0.381207	-0.193363	-0.485607	0.326639	-0.0109447	-0.459968	0.287553	0.199511	0.244623		0.127758	0.283987	0.203856	0.268618	0.0807694	0.0473125	0.0702625	0.0628371	-0.265598	0.15424	0.23	0.41	0.124701	0.06	0.0363173	-0.114768	0.457828	0.374151	-0.16	0.3665
1110038F14Rik	0.937256	1	-0.150482	-0.394037	-0.194724	-0.301046	0.219611	0.114215	-1.335	-0.985	0.00462875	0.105161	0.0550502	0.021449	0.0769439	-0.0154599	0.0561239	-0.0383777	0.0400807	-0.032984	0.256093	0.0934712	-0.0797683	-0.226667	0.1	0.127235	-0.113333	-0.197857	-0.471559	0.00991488	-0.15362	0.024	0.177
1110051M20Rik	0.517831	1	0.0544875	0.092002	-0.120765	-0.551252	0.454521	0.759028	0.04	-0.395	0.210665	0.322145	-0.0655141	0.190942	0.290575	0.320904	0.152294	0.13297	0.110049	-0.0314679	-0.137089	0.41915	0.334288	0.393333	0.0433333	0.442755	-0.483333	0.226348	0.164248	0.414229	0.511116	0.0395	-0.0255
1110057P08Rik	0.0531868	0.387097									0.104332	0.0870824		0.174794	-1.59542	-0.0342808	-0.0832756	0.0488591	0.327224	0.0541257	-0.0169119		0.0538373			-0.0680713
1110059E24Rik	1.42937	1	-0.680135	-0.377379	-0.1742	-0.0823637	0.0958821	-0.408013	-0.755	1.065	-0.0530928	0.0502951	0.0326877	0.41369	0.371412	0.280618	0.679632	0.0694738	-0.144105	-0.295293	-0.168449	-0.338946	0.209068	0.0966667	0.02	-0.170127	-0.203333	-0.58078	-1.63706	-0.293059	-0.619274	-0.129	-0.517
1110059G10Rik	0.892372	1	-0.353588	-0.299765	-0.177433	-0.528306	0.230261	-0.676972	-1.7	0.515	-0.073739	0.4112	-0.0113296	-0.029618	-0.0385729	0.461762	0.515771	-0.31652	-0.0357306	0.167771	0.138326	0.216618	0.38475	-0.193333	-0.15	-0.139094	-0.06	-0.150182	0.270067	0.0905414	0.271636	-0.1245	0.4845
1110065P20Rik	1.64443	0.806452		-0.335418	0.0913695	-0.41157	0.565983	0.694507	1.625	0.13	-0.0625946	-0.175507		0.0242848	0.100909	-0.0670544	0.157571	0.019385	0.010704	0.0779532	0.135679	0.0856857	-0.0168407			0.223065	0.0666667			-0.0671639	-0.0898585	0.094	-0.19
1190002N15Rik	0.544728	0.967742		-0.189375	0.206577	-0.678868	-0.0823838	-0.519493	-0.520206	-0.29067	-0.381586	-0.125668	0.402005	-0.152153	-0.618495	-0.250672	-0.160533	-0.204654	-0.268855	-0.382171	-0.381415	-0.0981594	0.29664	-0.00666667	0.193333	-0.0232928	-0.456667	-0.106254	0.498609	-0.461288	-0.119818	0.3215	0.8565
1190003K10Rik	0.0232205	0.354839		0.275634	-0.485427	-0.0995357	-1	0.059695	0.35	-0.3																				-0.0579364	0.104483	0.024	0.82
1190005I06Rik	0.572888	1	0.361987	-0.116695	-0.586215	-2.97855	0.551453	-2.43415	1.215	0.795	0.218276	0.413626	0.908051	0.156146	0.0698765	-0.343329	-0.19099	0.113556	-0.0470643	0.304052	0.533844	-0.0717831	0.100807	0.206667	0.636667	0.215222	0.233333	0.735238	0.625157	1.78071	0.479374	0.139	1.197
1190007I07Rik	0.26012	0.516129									-0.448051	-0.088694		-0.445915	-0.0554856	-0.12626	-0.893098	0.190451	0.363065	-0.204614	-0.361043	-0.0797007	-0.192916			-0.244217	-0.0966667					-0.185	-0.475
1200014J11Rik	1.07165	1	-0.473049	-0.429662	-0.439161	-0.566066	-0.012179	-0.263545	-0.175004	-0.0230643	-0.096974	-0.15185	0.0129479	0.133617	0.113904	0.0939887	0.105822	-0.145995	-0.140938	0.146961	-0.103023	-0.0409771	0.117761	0.136667	0.0533333	0.0355192	-0.07	-0.127958	-0.0251763	-0.120615	-0.289326	-0.0916667	-0.0363333
1300017J02Rik	0.130096	1	0.388757	-1.02541	0.308807	-0.148863	0.712476	-0.0696733	0.145	-1.14	0.101076	-0.310495	0.0409565	0.296474	-0.0100465	0.0304334	-0.0780541	0.20668	-0.058618	0.216356	0.0868475	0.042314	0.0389415	-0.33	0.00666667	0.0694888	0.1	0.082082	-0.103907	0.118172	0.151493	0.054	0.395
1500002C15Rik	0.16066	0.741935		-0.994546	0.119258	-0.912537	1.41099	-0.312177	0.845	0.04	-0.260309	-0.088279		0.1187	0.127273	0.0131601	-0.0351117	-0.0468667	0.0928942	-0.165183	0.0283724		-0.738659			-0.0922947				-0.1552	-0.066834	-0.21	0.222
1500009C09Rik	0.194267	0.806452		-0.169925	0.485427	0.253757	-0.0324215	-0.4376	0.385	-0.655	0.522613	0.401736		0.118104	0.0407068	-0.00992788	-0.0230172	-0.0398148	0.206333	0.1913	0.181571	-0.0266944	-0.0535453			0.142068	0.24			-0.0601444	-0.370899	0.0335	-0.0755
1500009L16Rik	0.0272985	0.354839		-0.665944	0.271619	0.0151138	0.0995357	0.548734	0.100035	-0.0867111																				-0.0390166	0.0515212	-0.549	-0.728
1500011B03Rik	0.549079	0.806452		-0.249217	0.00466846	-0.924756	0.471921	0.0567664	1.12495	0.453031	-0.00372469	-0.0844319		0.137334	-0.250335	0.297058	0.0965816	0.113017	0.0757375	-0.222016	-0.0861842	0.129329	-0.0198113			0.401865	-0.0966667			0.0571484	-0.00709897	0.147	0.2535
1500011K16Rik	1.06132	0.83871	-0.130299	-0.390681	0.421249	-1.07817	0.443919	-0.394907	0.325	-0.19	-0.248526	-0.299115		-0.42801	-0.0880814	-0.123959	0.254483	0.00549353	-0.0669727	-0.150749	0.136397	-0.4673	-0.136601			-0.0286199	-0.06			-0.614296	-1.10723	0.091	-0.2115
1500015O10Rik	0.402663	1	0.436668	-1.14706	-1.25669	-0.751067	1.16129	3.1391	0.105161	-0.0864807	0.0243635	-0.0407135	0.0450399	-0.0802397	-0.271264	0.0637033	-0.372337	-0.310542	-0.239445	-0.0154722	0.087857	0.100973	0.104182	-0.123333	0.0633333	0.00786842	0.00666667	0.231618	0.0903779	-0.00966532	0.038346	-0.181	-0.42
1500035N22Rik	0.160907	0.741935		0.369926	0.418937	-0.660825	0.43345	0.0862917	0.895	0.09	-0.123705	-0.297071		0.160784	0.262735	-0.035609	-0.159952	-0.0795503	-0.0627976	0.145685	0.251343		0.0632547			-0.116965				-0.0191734	-0.276877	-0.486	0.143
1600002H07Rik	0.556085	0.83871	-0.897711	-0.629563	-0.332758	-0.404214	0.165884	-0.351642	0.515	-0.59	-0.282588	-0.420777		-0.0290811	-0.188647	0.0875718	0.134603	-0.334362	-0.420482	-0.499646	-0.462751	-0.30702	0.325146			-0.147209	0.04			-0.173492	-0.737987	0.095	0.472
1600002K03Rik	0.528783	0.870968	-0.414898	-0.324909	-1.35469	0.135766	0.242849	-0.332213	0.57	-0.95	-0.238275	-0.0989711	0.122039	0.0946065	-0.14708	-0.194953	-0.00183379	-0.369988	-0.172709	0.00674533	0.0800581	-0.0395606	0.00335173			-0.405563	-0.05			0.191888	0.192412	-0.183	-0.968
1600012H06Rik	0.975197	1	-0.1311	-0.148146	-0.207349	-0.391709	0.447155	0.45196	-1.78145	0.406127	0.462521	0.645968	-0.134678	-0.0982501	-0.095245	0.174285	0.0472303	0.359074	0.528974	0.241459	0.119337	0.211998	0.60904	-0.06	-0.186667	-0.30015	0.123333	0.298859	0.0956736	0.302922	0.9721	0.096	0.324
1600012P17Rik	0.128196	0.774194		0.541301	-0.257757	0	-0.452127	-0.028445	0.34	-0.39	-0.201187	-0.365431		0.0172144	-0.186209	0.0446205	-0.175265	-0.115573	0.0524191	-0.0731643	0.00156825		-0.0137495			-0.0463388	0.103333			0.0212116	-0.124258	0.019	0.263
1600014C10Rik	0.423283	1	-0.133595	-0.534247	0.303969	-0.337358	0.223508	-0.100584	0.77795	-0.257657	-0.200748	-0.187762	-0.212458	-1.30798	-0.470439	-1.52694	-1.2244	-0.00766527	-0.0134349	-0.0811129	-0.187878	0.0927995	0.27624	-0.0133333	-0.21	0.13647	-0.0533333	-0.169767	0.0165115	0.0811055	0.0662997	-0.463	0.691
1600014C23Rik	0.113409	0.741935		-2.41063	1.49381	2.2909	0.60514	-0.29938	0.61	-0.07	0.0878675	-0.25696		-0.166303	-0.236535	-0.0426056	-0.205605	0.101719	-0.056193	0.0631078	0.211788		-0.0832917			0.119149				0.101702	0.0298576	-0.223	0.23
1600014K23Rik	0.21552	0.806452		1.29749	1.70112	0.268006	0.0192791	-0.248565	0.785	-0.38	-0.0468502	-0.391089		-0.22017	-0.203664	-0.0492892	-0.378153	0.244106	0.230469	0.0576582	-0.00485354	0.00752531	0.0382951			0.120017	0.15			0.0849807	0.146671	-0.025	-0.521
1600015I10Rik	0.108774	1	-0.0118141	-0.217231	0.982926	-0.0652915	1.02554	0.0223733	0.49	0.615	0.148828	0.044753	-0.115904	-0.103083	0.0536452	-0.0758302	-0.156291	-0.0431987	-0.170848	-0.102674	-0.0444305	-0.0298262	0.0312777	0.1	0.11	0.20922	0.29	0.0524178	-0.00865038	0.171395	0.067106	0.194	0.47
1700001C02Rik	0.101998	0.870968	0.656042	0.101671	-0.466622	1.69151	-0.352513	0.0406374	0.628126	0.0448787	-0.0583059	-0.225059	-0.0189678	0.0638196	-0.19506	-0.0584384	-0.332807	-0.0427074	0.0880194	0.12624	0.169255	0.106693	0.041199			0.0246867	0.153333			-0.160722	-0.00305368	0.1075	-0.202
1700001C19Rik	0.274246	0.967742	0.578855	0.0853971	0.60999	0.167436	0.852356	0.0863798	0.636348	-0.35989	0.288749	0.381564	0.48378	0.106563	-0.113365	0.0793234	-0.316803	0.0471026	0.00208498	0.558872	0.608775	0.22828	0.176633	0.0433333	-0.0633333	0.194427		0.114239	-0.0274159	0.0796318	0.125703	0.066	-0.664
1700001F09Rik	0.174542	0.0322581											0.177689
1700001J03Rik	0.147347	0.548387									0.132301	-0.312058	-0.0019958	0.0098897	-0.0623336	-0.104134	-0.309203	0.0560752	-0.258157	0.0866258	-0.156176	-0.205812	0.0148753			0.128807	0.216667					-0.943	-0.245
1700001K19Rik	0.1113	0.967742	0.371818	-1.0607	0.926302	-0.200913	1.22239	-0.0929983	0.27	0.25	-0.1033	-0.154914		-0.172661	-0.23946	-0.33591	-0.261105	-0.0255116	0.0416959	0.0766721	0.132348	-0.0635647	0.0731073	0.396667	0.00333333	0.07763	-0.22	-0.0409633	-0.110255	-0.0121105	-0.17344	0.247	0.179
1700001L19Rik	0.0696469	0.806452		-0.367732	-0.0400774	-0.226276	1.16439	-0.153007	0.25	-0.25	0.0187359	-0.036959		0.256937	-0.143267	0.00552486	0.115861	0.202008	0.0969371	0.0922645	0.0540466	0.034138	0.0206703			-0.0125923	-0.143333			-0.19162	0.0306182	0.112	0.824
1700001O22Rik	0.239761	1	0.356595	1.96153	-1.12338	-0.0443941	0.306202	-0.320268	1.535	0.12	0.284434	-0.000322767	-0.0385357	-0.167962	-0.203236	-0.377058	-0.0369905	0.320399	0.307418	0.0599961	-0.145793	0.630126	0.0299495	0.243333	0.42	-0.294925	0.0633333	-0.023553	-0.124299	0.179396	0.804374	-0.323	-0.197
1700001P01Rik	0.0708331	0.870968	-0.445546	0.754888	0.180572	0.373458	0.646477	-0.279427	0.468854	-0.00892509	-0.233564	-0.209692	0.116379	-0.141536	-0.35386	0.0299591	0.345276	0.0400697	-0.0585354	-0.247291	-0.0497209	0.0678657	-0.00380578			-0.179503	0.04			0.328216	-0.00443938	0.243	0.047
1700003E16Rik	0.147336	0.806452		0.835535	-0.509253	0.304441	0.54374	0.03882	0.6	-0.355	-0.419691	0.0433297		0.0192242	0.0272306	0.150744	-0.158505	-0.394339	-0.0852121	0.123682	0.280661	-0.145924	0.122976			-0.0259323	-0.53			-0.113315	-0.140219	0.48	0.102
1700003E24Rik	0.0688662	0.83871		0.222392	0.816288	1.87447	0.0515303	0.0561583	0.28	0.175	0.0521941	-0.128587	0.0144072	-0.0262021	-0.291598	-0.123873	0.065576	0.0983578	0.0309181	-0.0543791	0.0639956	0.150125	0.0622087			0.0502299	0.02			-0.211552	-0.136981	-0.0735	0.157
1700003F12Rik	0.19869	0.83871		-1.10099	0.741324	-0.178881	0.621466	0.171165	0.436782	-0.259324	0.165066	-0.162639	0.0424715	-0.29568	-0.122049	0.0108887	-0.348931	0.180222	0.0398322	0.0401817	0.361224	0.0760747	-0.0761366			0.216287	-0.0133333			0.361929	0.9676	0.045	0.3195
1700003H04Rik	0.0277161	0.741935		0.576647	-0.0576268	0.461331	1.3322	-0.254053	0.548303	-0.280456	0.0686366	0.0319061		0.141286	0.150784	-0.0455967	0.153293	0.0489317	0.0896753	0.076001	0.287799	0.215093	-0.0343323			0.0371232	0.106667			-0.0215407	-0.107757
1700003M02Rik	0.0616175	0.870968	0.328867	-0.352516	0.283793	0.613645	-1.49837	0.134517	0.715	-0.365	-0.0882239	-0.0929584	-0.0293904	0.00872122	-0.0350466	-0.0290808	-0.0436508	-0.00761484	0.079727	-0.0583318	0.0286831	0.0138706	0.0194203			0.00973132	-0.256667			-0.0206923	-0.195743	-0.0285	-0.196
1700006A11Rik	0.0274747	0.806452		-0.6386	-0.557218	-0.887232	-1.03103	-0.148543	-0.01	0.095	-0.0649534	-0.0562582		-0.0625115	-0.0951956	-0.207596	0.146916	-0.00197855	0.0407331	-0.0305164	-0.12631	0.0108247	0.0882232			-0.0144003	-0.123333			0.00845671	0.0593048	0.004	0.038
1700006E09Rik	0.0294323	0.806452		1.58496	-2.78136	-2.23266	1.62449	-0.373552	0.065	0.06	-0.0811307	-0.0445143		-0.186956	-0.146509	-0.144509	0.379645	-0.0130992	0.225019	-0.0412308	-0.191453	-0.0485098	-0.0371305			0.0206666	0.106667			-0.0811734	0.0448753	0.913	1.063
1700007B14Rik	0.0287139	0.806452		-0.821403	-2.02554	-0.862496	-1.25154	0.0448133	0.51	-0.34	0.00324208	-0.120075		-0.0607273	-0.229542	0.192649	-0.00817836	-0.0568735	0.0253668	-0.160287	0.0966408	-0.192077	-0.00596655			0.106026	0.206667			0.143061	-0.063965	-0.837	0.554
1700007G11Rik	0.0428149	0.870968	0.536429	-0.923379	-0.514573	2.20163	2.36257	-0.03994	-0.23	0.42	-0.0831892	-0.0493427	0.0149292	0.371918	0.0615634	-0.121651	-0.112112	0.0184205	-0.00152864	-0.0228759	0.189437	-0.0628944	0.0710525			0.503024	-0.11			-0.197209	-0.170228	0.126	0.613
1700007K09Rik	0.110404	0.870968	0.273583	-0.346479	-0.100841	-0.0891524	0.357612	-0.107852	1.03	-0.495	-0.0681893	-0.113719	0.00765993	-0.0123783	-0.361633	-0.17722	-0.176744	0.111986	0.130026	0.191781	-0.0520277	-0.163065	0.191399			-0.00836007	-0.01			-0.00292397	0.158754	0.00866667	-0.0686667
1700007K13Rik	0.155607	0.83871	-1.63956	-0.420921	1.10388	-0.112401	-0.214033	-1.81181	-0.205	-0.365	-0.0822235	-0.00938686		-0.459137	-0.416776	-0.12998	-0.0959736	0.377169	0.146313	-0.109244	-0.186874	-0.0575037	0.0932337			-1.1158	-1.1			0.0950651	0.229189	-0.874	0.503
1700008O03Rik	0.125739	0.806452		0.571906	0.106915	-1.90689	-0.251539	-0.270905	0.535	-0.625	-0.24649	-0.152847		0.165235	-0.0506237	-0.272658	-0.0429444	-0.0353764	0.0821997	0.0798347	-0.110701	-0.0556136	0.0106837			0.137543	0.0133333			-0.184898	-0.284971	0.161333	0.877667
1700008P02Rik	0.0383096	0.806452		-0.581448	-0.593375	-0.391021	0.69105	0.0581033	0.225	-0.28	0.174393	-0.0581391		-0.00354768	-0.0912429	0.0384759	0.0857367	0.208753	-0.190573	0.10627	0.107764	-0.0713553	0.0744967			-0.0743142	-0.0433333			-0.0183549	-0.36596	0.362	0.08
1700009J07Rik	0.0414968	0.83871	0.282895	-0.263034	0.857981	-0.241008	0.459432	-0.11781	0.5	0.1	-0.181912	-0.105032		0.127254	-0.14333	-0.178691	-0.175703	-0.156034	0.0443598	0.203975	-0.0882992	0.00906468	0.0488347			0.0386138	0.0633333			-0.0762531	-0.0960678	0.662	-0.382
1700009N14Rik	0.0676841	0.806452		-1.69326	0.0729096	-1.06912	0.542898	0.776307	0.295	0.185	-0.137823	-0.0609544		-0.0302685	0.196533	0.207105	-0.170557	-0.0229915	0.0841127	-0.103458	0.207129	-0.0881344	0.0187695			0.203229	0.823333			0.788734	-0.267945	0.166	0.244
1700010B08Rik	0.105219	0.741935		1.15673	0.400903	0.982513	0.874469	-0.134315	0.495	-0.28	0.0326651	0.0545502		0.0767985	-0.0613199	-0.451548	0.0315854	0.302197	0.085461	-0.0320745	-0.192681		0.040954			0.0582322				0.234544	0.0860381	0.219	0.149
1700010D01Rik	0.0449536	0.483871									0.191603	-0.0602877	0.404045	0.315984	-0.293248	-0.307954	0.00845023	0.0520039	-0.259596	0.164623	0.269072		0.0695085			0.00517881						-0.356	0.027
1700010I14Rik	0.0946237	1	-0.0966017	0.0489658	0.828325	-0.632152	0.740731	-1.24947	0.220997	-0.116007	0.583418	-0.217408	-0.0800641	-0.0604546	-0.0845804	-0.0955438	-0.118582	0.167806	-0.301048	-0.213875	-0.107948	-0.0732394	0.227261	-0.07	0.106667	-0.0629211	-0.0233333	0.0194029	-0.00680546	0.0068133	-0.0667916	-0.056	-0.123
1700010L04Rik	0.0402191	0.741935		-1	0.993243	-0.383787	-0.324525	0.263025	0.54	-0.06	-0.0672857	-0.0135243		0.0352163	0.206982	-0.0621525	0.0437708	-0.112896	0.104486	0.0509549	-0.0633487		0.249736			0.053347				-0.0976048	-0.105863	0.414	0.3
1700010L13Rik	0.481778	0.451613									0.0302892	-0.361251		-0.0196558	-0.29892	0.0071111	-0.443283	0.0829969	-0.096998	0.097637	0.120823		0.0587704			0.150632						0.188	-0.059
1700011A15Rik	0.33834	1	0.562145	0.182864	2.86634	0.699919	1.238	-0.454065	1.065	-0.785	0.249867	-0.180544	0.0890438	-0.00482485	-0.0416665	-0.288904	-0.253207	-0.0681861	-0.0895337	-0.0521601	0.213685	0.0804772	0.0329604	-0.126667	-0.1	0.0569668	-0.0833333	0.143169	0.0028303	-0.425423	-0.267813	-0.136	0.003
1700011E24Rik	0.0500594	0.806452		-3.30743	-2.19377	2.39232	-2.82443	0.078475	0.035	0.19	-0.0959644	-0.0730045		0.116433	0.0892472	-0.333936	-0.0407028	-0.0293978	-0.00243145	0.126064	0.0222241	-0.146461	0.0623686			0.0133583	0.11			0.218575	0.320242	-0.207	-0.523
1700011H14Rik	0.185551	1	-0.288364	-0.0931094	-4.09605	-4.3229	-2.77335	-0.117317	0.04	0.23	-2.31331	-1.54545	-0.00376515	0.215017	-0.0106916	0.0956265	-0.289407	-0.255532	-0.269392	-0.950357	-0.903923	-0.0390906	1.73034	-0.05	0.306667	0.0882937	0.03	-0.434364	0.277498	-0.479751	-0.129647	-0.808	-0.738
1700011I03Rik	0.0349646	0.806452		-0.30117	-1.41504	-1.15528	1.3356	-0.223775	0.5	-0.22	0.0786667	-0.151113		0.0778986	0.0572222	-0.0883121	-0.0296121	0.119825	-0.0638567	0.00493772	0.164655	0.0608998	-0.128964			-0.089227	-0.0633333			-0.0925052	-0.0499024	-1.291	0.338
1700011L22Rik	0.0691584	0.806452		-1.05184	0.0759489	0.931287	0.672425	-0.048765	0.195	-0.045	-0.1634	-0.0879549		0.282824	-0.0864053	-0.233072	-0.369382	-0.0854481	0.242051	0.0555777	0.0940662	0.0280528	-0.0363227			0.0247958	-0.05			0.221898	-0.0281693	0.472	-0.012
1700011M02Rik	0.0234784	0.354839		-2.77897	0.947533	-1.08246	0	0.0810817	0.895	0.29																				-0.305725	0.0522261	0.068	-0.048
1700012A03Rik	0.0600356	0.870968	0.741384	0.150906	-0.0581811	-0.214505	1.20375	-0.381563	-0.015	-0.235	-0.098894	-0.152065	0.130892	0.00663206	0.188719	-0.309542	-0.107294	-0.0159007	0.1704	-0.101089	0.124497	-0.0995183	0.0480079			0.0768693	0.00333333			-0.0451008	0.0717632	0.054	0.365
1700012B07Rik	0.0619183	0.806452		0.111031	-0.328623	1.1635	-0.0951572	-0.11016	0.94	-0.155	-0.0846513	0.0752017		-0.0541659	-0.000256759	0.0994638	-0.0681713	-0.00392141	-0.0297614	-0.127759	0.0385533	0.0232424	0.0298836			0.0341768	0.0866667			-0.0573046	-0.142643	-0.641	0.0505
1700012B09Rik	0.0414548	0.870968	0.0175629	-0.040642	-0.160465	-0.652077	-0.782409	0.759862	0.325	-0.13	0.166739	-0.0845167	-0.125576	0.0784135	-0.02419	-0.0520339	-0.113066	0.0664833	0.0406574	0.0281541	-0.0410469	-0.000371376	0.0214656			-0.0419319	0.04			0.0432382	0.108282	0.522	-1.429
1700012L04Rik	0.116494	0.322581											-0.0492575	0.132802	-0.212826	-0.0429083	0.0300122					-0.0334996	-0.0376292			0.000563728						-0.513	-0.042
1700012P22Rik	0.0793997	0.806452		-0.701465	0.292826	-1.29204	-0.294382	-0.0827909	0.679202	-0.109017	0.0488385	-0.159287		0.600403	0.194266	-0.237741	1.6045	0.253979	-0.166715	0.0451306	-0.0457021	-0.0470664	0.00206318			0.015785	0.0666667			-0.151898	-0.237481	0.148	-0.214
1700013D24Rik	0.0854101	0.806452		0.291231	2.12433	1.19931	0.584963	-0.117382	0.475	-0.59	-0.0195156	-0.0873733		-0.0771051	0.0353616	-0.200375	0.204989	0.0815561	-0.0137309	-0.0023149	0.042942	-0.151986	-0.0548259			-0.055487	0.08			-0.0287514	0.100626	0.781	-0.226
1700013F07Rik	0.0851191	0.806452		-0.641062	2.0781	1.14233	0.543496	-0.269685	0.244189	-0.0635073	0.0218727	-0.204839		0.0816867	-0.0268419	-0.0179573	-0.205876	0.188158	0.0498057	-0.0337463	0.0154064	-0.0305984	0.0227462			0.0800483	0.07			0.0273081	0.000127961	-0.012	0.418
1700013G24Rik	0.0949894	0.870968	0.603734	-2.04891	0.0768936	-1.09954	0.629888	0.527967	0.4	-0.305	0.120933	-0.0130206	0.110147	0.0651145	-0.0568323	-0.166128	-0.443744	0.0326309	-0.0370337	-0.108851	0.196388	-0.0218099	0.0625615			0.0518436	0.0633333			-0.151785	-0.0350027	0.278	0.034
1700013H16Rik	0.0212321	0.741935		0.584963	3	1.926	0.485427	0.00872167	0.01	-0.4	-0.000971814	-0.00400948		-0.014814	-0.0475669	-0.0264668	-0.0295356	0.0183225	0.0167944	-0.0294515	-0.0611278		0.0142775			0.032712				0.0495551	-0.0287021	1.433	1.279
1700014D04Rik	0.0646202	0.451613									-0.0973625	0.0190443		0.125237	-0.356531	0.0154687	-0.534564	-0.049709	0.0606821	0.165662	0.205706		-0.0507227			-0.19294						-0.151	0.025
1700015E13Rik	0.0780107	0.83871		0.464668	0.0344884	-1.10362	1.73697	-0.0852433	0.445	-0.205	0.0253658	-0.0435955	0.00834164	0.0557926	-0.0233021	-0.0182657	-0.233734	0.115071	-0.0828826	-0.0757436	0.133719	0.0857618	0.0474049			0.0301801	-0.0933333			0.0411334	-0.0323977	-2.015	-0.976
1700015F17Rik	0.025802	0.354839		0.881095	0.39486	-0.08092	-0.862496	0.127848	-0.065	-0.19																				0.0459715	-0.0405411	0.469	0.178
1700015G11Rik	0.011564	0.354839		0.321928	-0.807355	-1.73697	-0.415037	-0.00413	-0.075	-0.535																				0.119788	0.00253773	0.122	0.865
1700016C15Rik	0.135292	0.83871		-1.26267	-2.01139	-2.11548	0.459432	-3.03794	0.955	1.285	-0.136924	-0.0890827	0.0154845	-0.362029	0.115297	-0.150763	-0.22344	0.242148	0.327408	-0.331873	-0.339779	0.207721	0.421413			-2.20678	-1.67667			-0.435402	1.02151	0.927	0.057
1700016D06Rik	0.132798	1	0.238025	-1.12928	0.14439	0.222392	-1.53605	-0.0838383	0.36	-0.53	0.087322	0.0582047	0.0496431	0.0705552	-0.140315	-0.0121033	-0.0478752	-0.0883987	-0.0427882	0.154419	-0.0372753	-0.10985	-0.0512462	0.21	-0.19	-0.0552434	-0.13	0.0567449	0.0267832	-0.188587	-0.196747	0.566	0.287
1700016H13Rik	0.0545242	0.83871	0.505314	1.88136	-1.65578	-1.09954	-1.53051	-0.140383	0.385	0.07	-0.00103156	-0.276943		0.0764859	-0.138273	-0.192871	0.00216031	-0.0377128	-0.106299	-0.0145148	-0.0108586	0.0173861	-0.0502275			0.0903598	0.0633333			0.0735139	-0.00772738	0.054	0.0425
1700016K19Rik	0.188407	0.83871	0.570397	1.09954	1.32895	-1.55117	1.10692	-1.26508	0.205	-0.145	-0.0455232	-0.274884		-0.00541093	0.243187	-0.110521	-0.422611	0.105546	0.105469	0.271338	0.0929955	0.0276834	-0.0426051			0.0705736	0.116667			0.0397711	0.154636	0.113	0.217
1700016P04Rik	0.0137065	0.354839		-0.866733	2.87447	0.736966	2.58496	-0.141335	0.23	-0.31																				-0.0828719	-0.100825	0.582	0.157
1700017B05Rik	0.910398	0.967742		-0.137476	0.0385216	0.0781075	0.605035	-0.224213	0.775447	-0.860941	0.312311	0.646045	-0.00688257	0.146874	0.196611	0.312977	-0.225746	-0.0869293	-0.0261074	0.439226	0.432067	0.400385	-0.160458	0.126667	-0.206667	0.338927	-0.253333	0.728997	0.808949	0.0353522	0.430888	0.045	1.11
1700017D01Rik	0.0204196	0.806452		-0.807355	0.893085	-4.14296	-1	0.0859717	0.145	0.05	-0.00567783	0.0468006		-0.0435917	0.0303483	0.0962744	-0.15004	-0.0217563	0.0553451	0.0143183	0.0192085	-0.0404952	0.07241			-0.0387542	-0.176667			0.268564	0.237774	0.411	-0.064
1700017N19Rik	0.0356884	0.83871		-0.206451	-0.222392	0.0780025	0.321928	-0.132175	0.48	0.085	0.0378718	0.0043527	-0.143422	-0.0327137	0.0341554	-0.0232726	-0.0616406	0.0911072	-0.149763	0.00125983	0.229525	0.0310029	-0.101649			0.0602423	0.04			0.016124	-0.0480992	-1.72	-1.687
1700018B08Rik	0.139605	0.83871	0.179315	3.13124	-0.68966	-1.1894	1.78499	-0.120327	1.21	0.21	0.149517	0.0478132		0.028361	-0.200649	0.0454096	-0.219863	0.090975	-0.119559	0.235031	0.306249	0.0178911	-0.0129562			-0.102988	0.143333			0.142314	-0.0380926	-0.505	-0.468
1700018C11Rik	0.0805158	0.870968	0.592083	-1.05889	-0.19878	-0.0210616	-0.5654	-0.0968483	0.65	-0.8	-0.12584	-0.100005	-0.0336074	0.0896587	-0.0301432	-0.225829	-0.290447	0.19657	0.0569424	0.127529	0.245099	0.0913797	-0.0694287			-0.12108	-0.0866667			0.0141082	-0.0448928	-0.031	-0.166
1700018F24Rik	0.0537775	0.870968	-0.258681	-1.45606	0.426265	0.0759489	-0.791413	-0.178502	0.225	0.2	-0.110592	0.0437767	-0.0581945	0.2859	-0.276928	-0.00556685	-0.131302	-0.221678	-0.0868906	0.324747	0.123972	-0.0247221	-0.0576604			-0.0272317	-0.01			-0.205873	-0.053395	0.036	0.053
1700019A02Rik	0.0241126	0.806452		-1.14622	-0.464668	-1.60666	0.180572	-0.144298	0.46	-0.43	-0.202515	0.0899355		0.0158328	0.195819	0.00135347	0.0773777	-0.0660701	0.169299	-0.186479	0.0685924	-0.118429	0.150944			0.00215136	-0.01			-0.147822	-0.0716057	-0.008	0.24
1700019B03Rik	0.0454342	0.83871	0.235844	-0.360256	-0.906891	0.845672	-1.95269	-0.0616767	0.095	-0.25	-0.0991347	-0.216154		0.0242235	0.0294509	0.0512407	-0.240172	-0.243064	-0.0163699	0.313283	0.110514	-0.00375677	0.0368668			-0.0448643	0.00666667			-0.0220273	-0.0615795	0.312	0.343
1700019D03Rik	0.0849852	0.870968	0.261856	-0.373357	-0.0719362	0.400095	1.00406	-0.61158	0.396307	-0.0559651	0.140409	4.84105e-05	-0.032829	0.136636	-0.501978	0.14844	-0.301511	0.129196	0.0446781	0.0287934	0.14287	-0.0680277	-0.0597634			-0.0373223	-0.153333			-0.0409435	-0.0168514	-0.032	-0.122
1700019G17Rik	0.197449	0.967742		-0.27693	-0.0596344	-0.1573	0.466783	-1.14874	0.129038	-0.164165	-0.140287	-0.251223	-0.0613657	-0.122179	-0.487274	-0.284387	-0.410984	-0.080896	-0.367268	-0.0836319	-0.130824	-0.245182	0.533232	0.0633333	0.0266667	-0.352475	-0.593333	0.0600928	-0.0130881	-0.107827	-0.0622513	0.067	-0.871
1700019L03Rik	0.247967	0.516129		-1.14543	1.11136	-1.66718	0.152003	0.0205333	0.315	-0.455			-0.0513786											0.0366667	-0.46			0.28342	0.13141	0.361196	0.0694678	0.394	-0.585
1700019N19Rik	0.171374	1	0.660939	3.06848	-0.485427	-2	3.54057	0.173992	0.73	0.555	-0.0406265	-0.0262677	0.0374229	0.192381	-0.0909683	-0.0427725	-0.375152	0.0965836	-0.0612093	0.134965	-0.122976	0.0716059	-0.100894	0.163333	-0.0833333	0.0114337	0.0833333	0.161604	-0.117387	0.102883	-0.00972795	0.023	-0.688
1700019O17Rik	0.178174	0.806452		-0.297998	-0.5025	3.28688	1.19265	-0.0389567	1	-0.145	0.0305213	-0.188187		0.0993652	-0.188263	0.0675395	-0.260923	-0.10587	0.0295027	-0.0187837	0.134068	0.135817	-0.00616511			0.014726	0.206667			0.185722	0.0651071	0.085	-0.031
1700020A23Rik	0.107855	0.806452		0.383823	1.9087	-0.771376	-0.674362	-0.127008	0.505	-0.475	0.261527	-0.113169		-0.0567163	-0.0559868	-0.112811	-0.105349	0.185563	-0.259796	-0.0589072	-0.0285194	4.85887e-05	-0.0313343			-0.00466634	-0.0366667			0.0901411	-0.172589	0.039	0.326
1700020D05Rik	0.1286	1	-0.0102593	0.944291	1.92892	0.513601	-3.0163	-0.204232	0.095	-0.105	0.0292738	-0.0487033	-0.0409465	0.0943909	-0.149937	-0.194385	-0.130824	0.0587959	0.0421715	-0.0158297	-0.139525	0.163914	0.00958359	-0.00333333	-0.02	0.0658658	-0.106667	0.17221	-0.0504214	-0.0378585	0.0794502	-0.255	0.081
1700020L24Rik	0.1555	0.870968	-0.496825	-2.36257	1.24576	-1.39232	0.520832	-0.963605	0.275	0.035	0.0395803	-0.450871	0.0437427	0.19863	-0.0742151	-0.131706	-0.21149	0.00158113	-0.0850146	0.180175	0.177004	-0.0360086	0.0170341			0.0382706	0.08			0.0143881	-0.107193	0.159	-0.381
1700020N01Rik	0.0785403	0.870968	0.452636	1.06311	0.121872	-0.411678	0.520603	0.133952	0.42	0.31	-0.0651178	-0.265161	0.115237	0.241381	-0.0188933	-0.184609	-0.0872217	0.181506	0.0795519	0.177227	0.143378	0.0899628	-0.0143871			-0.0526867	0.0533333			0.123864	-0.417203	0.154	-0.197
1700020N15Rik		0.0645161																														-0.019	-0.283
1700021F05Rik	1.20127	1	-0.571734	-0.361699	-0.173022	-0.560958	0.0152499	-0.190415	-1.07	1.02	-0.583877	-0.175793	-0.305524	-0.0901306	0.0512698	0.100452	0.490895	0.0126261	0.137002	-0.633683	0.0883363	-0.498996	-0.0323304	0.276667	0.176667	-0.17536	-0.0266667	-0.484491	-0.217869	-0.133024	0.0266314	-0.25	-0.722
1700021F07Rik	0.129541	0.83871	0.352255	0.169925	1.12553	1.05889	-1.43296	-0.00245333	0.33	-0.645	0.116613	-0.249282		0.261086	-0.0537103	-0.186745	-0.517517	0.172612	-0.00232915	0.0289624	0.171753	0.00901949	0.093851			0.115913	0.276667			-0.0814447	-0.248815	-0.146	0.383
1700021K19Rik	0.880807	0.870968	-0.29042	-0.11768	-0.604801	-0.529321	0.59428	-1.00784	-0.215	-0.67	-0.0804261	-0.0899547	-0.355778	-0.0881242	0.17801	-0.150047	-0.0815492	0.396647	0.397961	-0.0944598	0.0374044	0.0436901	0.0633587			-0.123575	-0.06			0.092627	0.351785	0.024	-0.4045
1700021P04Rik	0.0441035	0.741935		-0.380031	-0.162939	0.40439	-1.11189	0.124788	0.735	0.295	0.0092323	0.026934		0.128757	0.0636548	0.00509263	-0.1933	-0.13757	0.0571288	0.106888	0.145077		-0.000360655			-0.01667				-0.139004	-0.049077	0.484	-0.182
1700022I11Rik	0.0499102	0.516129									0.0149788	-0.154666		0.18574	-0.156698	-0.0407303	-0.290059	0.122827	0.0428573	0.172313	0.0513227	0.0356147	-0.0896621			0.0750519	-0.16					-0.1785	-0.1005
1700023F06Rik	0.20493	0.806452		0.758379	-0.920928	0.705887	0.699246	-1.07575	0.6	-0.205	0.180928	-0.267401		-0.112024	-0.272932	-0.0100657	-0.302527	0.201994	-0.209789	0.0824999	0.0695761	-0.023933	0.0247707			-0.0165047	-0.00666667			-0.141271	-0.0487521	-0.051	0.067
1700024B05Rik	0.02348	0.322581	-0.152758	-3.65294	0.788496	-0.847997	0.321928	0.360378	-0.06	-0.13																				-0.135615	-0.138702
1700024G13Rik	0.0979885	0.548387									-0.0519294	0.00645339	-0.109152	0.170626	0.0709281	-0.103997	-0.344857	0.112367	0.163682	-0.0447925	0.112664	-0.0711642	-0.104751			-0.0388864	-0.143333					0.182	0.539
1700024P04Rik	0.0484951	0.806452		0.210218	-1.07039	-0.0588937	-0.374396	0.186712	0.69	0.145	0.089807	-0.0742438		0.163134	-0.345812	0.132187	-0.0856071	0.0996839	-0.0945747	0.0762047	-0.0857544	-0.174839	-0.0745057			0.0153917	0.19			0.222581	0.158474	0.9805	0.241
1700024P16Rik	0.0730834	0.516129									0.0406386	0.0386866		-0.361473	-0.208981	-0.260752	-0.0728181	-0.121749	-0.103498	-0.0117595	-0.0071726	0.319893	0.0400917			-0.143435	0.0833333					-0.477	-2.255
1700025C18Rik		0.0645161																														-0.022	0.114
1700025F22Rik	0.0227097	0.870968	-0.223437	0.765535	2.32193	1.73697	-1.73697	0.0446567	0.395	0.055	0.0648176	0.0222486	-0.017435	0.055963	0.066301	-0.0196772	0.0322565	0.171446	-0.000601496	-0.0602555	-0.0751253	-0.0980511	-0.0167753			0.0387132	-0.03			0.290316	0.252262	0.091	-0.076
1700025G04Rik	1.62061	0.870968	-0.636375	-0.264206	0.354739	-0.181167	0.286787	-1.63107	-1.05716	0.312725	0.0586873	-0.0353224	-0.578081	0.112394	-0.341127	0.14869	-0.219843	0.837632	0.369816	-0.821336	-0.842654	-0.43883	0.327739			-0.391552	-0.13			-0.175281	0.0612653	-0.185	-0.364
1700026D08Rik	0.0584126	0.870968	0.445434	1.80177	0.182864	-2.18133	-2.6939	-0.3682	0.36	-0.225	0.128002	-0.181672	-0.072971	0.157343	-0.141001	-0.552298	-0.279977	0.148785	0.0159781	-0.119653	0.0289903	0.0102993	-0.059346			-0.0227452	-0.07			-0.184094	-0.224031	0.646	-0.066
1700026L06Rik	0.171606	0.83871		0.386675	0.64558	-0.505562	-0.0618653	0.855122	2.355	0.58	0.0668074	-0.0160292	0.0689879	0.217976	-0.142085	-0.0638797	-0.261389	0.0581022	-0.112276	0.0959555	-0.0481176	0.0114492	0.107257			0.0953711	0.0733333			-0.0668693	0.125682	0.068	0.264
1700028K03Rik	0.0678534	0.548387	0.290429								0.102747	0.173045	0.010846	-0.108578	0.0270528	-0.18696	-0.0145676	0.291124	-0.0287404	-0.105171	-0.0923844	-0.0912866	0.0284098			0.0556415						0.234333	-0.325667
1700028P14Rik	0.201051	1	-0.699237	0.392812	-1.54997	1.17201	0.401862	0.287057	0.035	0.25	0.201527	-0.133702	0.0630142	-0.0647468	-0.0225714	-0.21748	0.0204768	-0.153678	-0.204875	-0.0339202	-0.0963136	0.0115591	-0.0420598	-0.143333	-0.14	0.024733	-0.08	0.167681	0.0758469	-0.0367956	0.0129237	0.1515	0.2395
1700029F12Rik	0.071018	0.967742		1.46467	0.857981	-0.142019	0.621488	0.164887	0.96	0.495	-0.0247401	-0.163859	0.0012146	-0.034527	-0.330869	-0.177728	-0.18417	-0.0964129	-0.0626881	-0.118133	0.105822	0.14286	0.0727383	0.0466667	0.0133333	0.0134459	-0.0466667	0.156892	0.0259375	0.12783	0.0901394	0.619	0.717
1700029H14Rik	0.120916	1	0.227447	0.0611639	0.195635	-0.85561	1.078	0.393572	0.17	-0.765	0.00618404	-0.262758	0.0437431	0.198617	-0.21745	-0.207306	-0.389831	0.0941983	-0.0416961	0.102386	0.364492	-0.0760504	0.112952	0.0433333	-0.09	0.0502111	0.133333	0.0285797	-0.0679032	-0.0419872	-0.21646	-0.8735	-0.5125
1700029I15Rik	0.156162	0.870968	0.174606	-0.315454	-0.214628	-0.217936	-0.0525204	-0.444736	0.334953	-0.946074	0.175651	-0.196883	-0.292378	0.00402025	-0.327471	-0.384694	-0.336725	-0.0536553	-0.0219827	-0.0484629	0.0383446	0.115602	0.0353456			0.0486798	0.193333			0.0543848	0.283506	-0.0815	-0.471
1700029J07Rik	0.0929744	0.83871		-0.608734	0.374848	-0.00978102	1.42321	-1.27414	-0.12	0.27	-0.188394	-0.0571455	0.0109663	0.174038	-0.304894	-0.360753	-0.0405727	-0.123612	0.242827	-0.0948258	-0.129947	0.164273	0.0506283			-0.152232	-0.223333			-0.107052	-0.0836467	-0.215	0.196
1700029P11Rik	0.0960675	1	0.349982	1.40808	-0.337035	-0.442005	-1.7425	-0.222248	0.425	-0.165	-0.0566713	-0.0533923	-0.0919438	-0.13513	-0.094004	-0.165691	-0.15007	-0.0101353	-0.114317	0.258148	0.0254698	-0.00822276	-0.0650201	0.11	0.246667	-0.116313	-0.0466667	0.189155	-0.0906602	0.124145	0.0547643	0.033	-0.3
1700030J22Rik	0.13751	0.870968	-0.00918557	-0.341037	-0.347923	-0.415037	0.201634	0.101707	0.405	-0.065	0.0505306	0.0080788	0.250557	0.231887	-0.077126	-0.407216	-0.427953	0.0335261	0.111138	0.0736963	0.0830017	-0.138502	-0.00634373			-0.0213698	-0.256667			-0.0343559	-0.0150135	0.452	0.064
1700030K09Rik	0.655653	1	-0.699078	-0.471946	-0.373935	-0.0515303	0.637774	-0.431662	0.405	0.325	0.106659	-0.189133	-0.0931153	-0.181838	-0.355294	0.112459	0.170299	0.0172751	-0.160999	-0.182617	-0.128924	0.0508633	-0.0499837	0.0333333	0.0566667	0.0803774	-0.0166667	-0.00685278	-0.102594	-0.215908	-0.230857	0.06	-0.002
1700031F05Rik	0.115393	0.806452		-0.040642	-3.24793	0.0588937	0.856227	-0.358993	0.38	0.205	0.231336	-0.269472		-0.379649	-0.722756	-0.522464	0.740285	0.0994573	-0.14831	-0.189622	0.343199	-0.159403	-0.270582			-0.0830475	-0.196667			-0.0492516	-0.171192	0.475	-0.144
1700031M16Rik	0.0518938	0.516129									0.0283248	-0.192577		-0.0427086	-0.108327	0.222098	0.101045	0.161602	-0.034726	-0.0145967	0.215491	-0.00362488	0.132582			0.110833	-0.05					-0.078	-0.21
1700034E13Rik	0.0504803	0.870968	0.55883	-0.430197	0.79593	1.13402	-0.159199	0.13242	0.52	-0.04	0.0185764	0.154967	0.00582758	0.0585874	-0.130221	-0.113255	-0.315632	-0.0676606	0.0192126	0.398369	0.467246	-0.0409869	-0.00636245			-0.0207418	0.146667			0.047538	-0.0329084	0.422	0.295
1700034I23Rik	0.0821667	1	0.408324	-0.884523	4.34577	-4.52356	-0.584963	-0.0382267	0.1	-0.15	-0.0286594	0.122956	0.00788972	-0.0973655	-0.0737251	0.0706041	-0.146484	0.0855863	0.0790897	0.162268	0.00415672	0.0491693	-0.129495	-0.0633333	0.723333	-0.0137925	-0.126667	-0.0819124	-0.25006	0.0134752	-0.228545	-0.5	-0.947
1700034J05Rik	0.0612938	0.83871	0.257474	-0.339984	1.90809	-1.63898	0.401251	-0.141645	0.0590425	-0.0594729	0.231874	-0.0668682		0.00314734	0.0329805	-0.170671	-0.0363125	0.352883	0.0712891	0.200095	0.254225	-0.018035	-0.055123			0.0578023	0.123333			0.17502	-0.00981712	-2.249	-1.26
1700034O15Rik	0.0588931	0.870968	0.442437	-0.412647	0.555698	0.475139	2.45457	0.379137	0.405	-0.125	-0.0617078	-0.0469976	0.0650574	0.073764	0.0947669	-0.216323	0.030848	-0.157504	0.0854301	-0.143614	0.1186	0.137615	-0.0250995			0.0814147	0.14			0.113181	0.156958	-0.055	0.048
1700037C18Rik	0.208603	0.83871	0.0965887	-0.134611	1.03159	-0.352746	0.506681	-0.0678588	0.520312	-0.165182	-0.0442656	-0.179649	-0.16887	0.110514	0.0744233	-0.135463	-0.419455	0.118522	-0.0589726	0.103108	0.00824888	-0.0379312	-0.0855714			0.0453962				-0.290603	-0.206703	-0.05775	0.3215
1700037H04Rik	1.28483	1	-0.545717	-0.102359	0.0307557	-0.178639	0.406938	-0.314005	0.413334	-0.728906	-0.224233	-0.0913338	-0.121771	0.0185307	-0.308278	-0.0694189	0.0896455	-0.0949032	-0.219822	0.025401	-0.208844	-0.352635	0.132472	-0.0333333	0.05	-0.55152	0.0633333	-0.101369	-0.280341	-0.0751725	-0.0150855	0.2745	0.263
1700039E15Rik	0.183949	0.83871		2.41504	0.881214	1.17632	-0.487938	-0.379952	0.315	-0.83	-0.0143452	-0.0487379	-0.0491614	0.0898632	-0.0178175	0.122092	-0.053266	-0.170542	-0.107803	0.0596122	0.07924	-0.0311101	-0.0119895			0.02068	0.00666667			-0.2072	-0.174298	-0.62	-0.136
1700040L02Rik	0.0526758	0.870968	0.227645	-0.884523	1.54057	-4.93074	1.1375	-0.0232917	0.33	-0.045	-0.150101	-0.479274	-0.00109848	0.068803	0.0799248	-0.157112	-0.27432	0.0117114	-0.139619	-0.000360651	0.237835	-0.105635	0.0400789			0.0167657	0.0333333			-0.0681814	-0.159903	-0.229	-0.107
1700042G07Rik	0.0999031	0.354839		0.380272	0.382882	-0.685364	1.40738	0.0571517	0.9	-0.41																				0.0159605	0.0562339	-0.044	0.259
1700047G07Rik	0.203221	0.387097									-0.127379	-0.311417		-0.129637	-0.364619	-0.329334	-0.143583	0.194433	0.314979	-0.18087	0.113649		-0.127542			-0.0732642
1700047I17Rik2	7.54646	0.0967742																									-0.01					-0.1355	-0.192
1700049E17Rik1	0.139019	0.387097									0.165029	0.741079		0.00174704	-0.196649	-0.224306	0.217567	0.213824	-0.293971	-0.286092	-0.484388		-1.64609			0.0148232
1700049G17Rik	0.11615	0.83871		-0.376383	-0.324668	0.141378	0.506278	-0.641396	-0.434208	-0.260295	-0.311775	0.214388	0.220475	-0.31586	0.378953	-0.0449569	0.303069	-0.28219	0.229714	-0.0468347	-0.321825	0.148526	0.131022			0.164004	-0.09			-0.0488301	-0.114112	-0.568	-0.083
1700056E22Rik	0.217067	0.806452		-0.544321	0.633461	-0.661017	1.40576	0.224207	0.18	0.08	-0.148122	-0.0256795		0.129273	-0.134462	-0.0226216	-0.351203	-0.118205	0.156298	0.120976	0.181939	0.0938632	-0.291369			0.348457	-0.0733333			-0.272248	-0.0068121	-0.0135	-0.0715
1700057G04Rik	0.0608163	0.83871		-2.23919	0.783291	2.86454	-0.357261	-0.08598	0.11	-0.165	-0.311636	-0.136401	0.0554342	-0.0166363	-0.150925	-0.275019	0.0435507	-0.0642568	0.114559	-0.00270035	-0.0638042	-0.100226	0.0624921			-0.0599801	0.0366667			0.037313	-0.14287	-0.5	-1.025
1700061G19Rik	0.0682874	0.83871		-0.0928215	-0.473283	0.461512	0.191796	0.167004	0.7012	-0.0311969	-0.0934115	-0.0450606	0.104907	0.178661	-0.105532	-0.0733034	0.0805618	-0.0350144	0.0400021	0.0322401	-0.0513191	-0.117254	-0.059029			-0.0269749	-0.17			0.0226552	-0.0694185	-0.101	-0.694
1700063H04Rik	0.0488477	0.741935		1.98903	0.0874628	1.37851	-1.71621	-0.122813	0.085	0.245	0.20486	-0.0901104		-0.137403	-0.0108427	0.0912823	0.016244	0.1077	-0.135544	0.0189449	0.173008		-0.00187544			-0.016795				-0.155601	-0.0882168	-0.154	-0.388
1700064H15Rik		0.0645161																														-0.48	0.088
1700066B19Rik	0.129644	0.806452		0.451107	0.355175	-0.135409	0.288599	0.0190717	0.78	-0.095	-0.0319744	0.0218775		0.127646	-0.36584	0.159366	-0.308599	0.059155	-0.00333432	0.00685004	0.113381	0.0016456	-0.0811523			-0.0703991	0.106667			0.0680163	0.0435302	-0.114	-0.361
1700066M21Rik	0.459137	0.806452		-0.492264	0.129587	-0.736742	0.804771	-0.541013	-0.986874	1.50257	-0.214132	-0.252951		0.166467	-0.235738	-0.145583	-0.707643	0.185601	0.125302	0.124497	0.0558648	-0.0532158	-0.226607			-0.182738	-0.00333333			-0.379565	-0.407186	0.049	0.517
1700067K01Rik	0.100316	0.870968	0.273853	-0.373043	0.00352307	-1.62803	0.453433	0.190807	0.6	-0.4	0.104976	-0.345542	0.0800206	0.0434599	0.02763	-0.0161302	-0.10224	0.0975516	-0.175939	-0.182056	0.0861557	-0.235399	-0.129977			0.160779	0.296667			0.0151119	-0.188577	-0.018	0.007
1700067P10Rik	0.101114	1	-0.0164589	-0.185556	0.328054	-0.0687128	0.726982	-0.22136	0.48	-0.295	-0.0426721	-0.214462	-0.0897921	0.121285	-0.0317262	0.0508669	-0.0879043	-0.00944483	0.243946	0.263904	0.0746309	-0.0949368	-0.0927535	-0.02	-0.07	-0.0160104	0.02	-0.073895	-0.063753	-0.0433302	-0.143722	-0.064	0.361
1700069L16Rik	0.105475	0.806452		-0.245112	0.408085	0.0687128	0.636037	0.0463733	0.33	-0.75	-0.0823063	0.100712		0.273162	-0.148908	0.0217897	-0.117632	-0.0603608	0.0656313	-0.0183012	0.0611943	-0.0141027	0.023708			0.123291	-0.0333333			-0.0821645	-0.199119	0.0825	0.083
1700074I03Rik		0.0645161																														0.257	-1.164
1700074P13Rik	0.0632401	1	-0.325914	-0.616671	2.56768	-0.698998	1.11548	-0.049115	0.09	-0.415	0.0884717	-0.0264179	0.241532	-0.129538	-0.219182	0.0159049	0.0013023	-0.00923445	0.0466432	0.0565962	0.0789242	-0.101147	-0.0421075	-0.233333	-0.253333	0.0685598	0.0566667	-0.0760514	-0.126457	0.0819044	0.103757	0.326	-0.067
1700080E11Rik	0.192584	1	0.239653	-0.705257	2.4458	0.0210616	2.93336	0.218795	0.215	0.125	-0.00424021	-0.0338473	-0.0327173	-0.223958	-0.233858	-0.135342	-0.304033	-0.19773	-0.113578	-0.0552511	0.0329629	0.157758	0.0365874	-0.156667	0.186667	-0.00649955	0.0966667	-0.0263841	-0.130839	-0.0725081	0.0421441	-0.306	-0.762
1700080G18Rik	0.274672	0.741935		-0.39564	0.308369	-0.849787	0.276518	-0.144778	2.04	1.365	-0.0669085	0.0270956		-0.0856204	-0.113496	-0.0286762	0.158922	-0.107424	0.0978065	0.0625756	-0.0372257		-0.0110684			0.276711				-0.40106	0.0458188	0.235	-0.035
1700080O16Rik	0.0509773	0.806452		-0.610053	0.462972	-0.722188	-1.98138	-0.393728	0.355	0.155	0.03787	0.0556447		0.199432	-0.061149	-0.504676	-0.110867	-0.0158156	0.079547	-0.0806579	0.113742	0.15544	-0.093285			-0.0882274	0.183333			0.270159	-0.133588	0.036	0.094
1700084C01Rik	0.100615	0.548387									0.168709	-0.0395754	0.115674	-0.220962	-0.0475669	-0.0502553	-0.0873531	-0.0194528	-0.135385	-0.0274271	0.337558	-0.00908452	0.0411225			-0.131745	0.0366667					-0.043	-0.1
1700084M14Rik		0.0645161																														0.206	0.224
1700086D15Rik	0.0564978	0.709677		-3.02035	-2.2697	0.118644	0.597902	-0.499688	0.74	-0.21	-0.0601757	-0.139424		0.0670708	0	-0.140561	-0.22905	-0.0074117	0.0664874	0.0826451	0.132298		-0.00560221			-0.0849502	-0.153333			-0.106326	-0.0634975
1700088E04Rik	0.677224	0.580645	-0.260044	-0.529338	-0.437455	-0.393496	0.362759	-0.666447	0.875	-0.16			-0.204165											-0.2	-0.29		-0.23	-0.244138	-0.0818544	-0.0909414	0.535956	-0.365	-0.369
1700092M07Rik		0.0645161																														-0.071	-0.042
1700093K21Rik	0.120369	1	0.0972104	0.667425	-0.652077	-2.72792	3.49476	0.0489683	0.23	0.305	0.00571515	-0.162729	-0.0686816	-0.0588833	0.0252032	0.130642	-0.154252	-0.117577	0.0470745	0.111111	0.0644057	0.0164157	-0.0209476	-0.146667	0.05	0.0765126	0.176667	0.0786573	-0.122478	-0.21709	-0.20968	0.614	-0.104
1700094D03Rik	0.505618	0.967742	-1.63515	-0.486249	0.470642	-0.437691	0.0943781	-0.20961	0.804321	0.261052	-0.0408576	0.0548107		0.0874335	-0.0851751	-0.0634011	0.293368	-0.683174	0.121367	-0.266431	0.0239484	0.418759	0.0497207	0.0266667	0.41	-0.154302	-0.0566667	0.247968	0.407727	-0.00949961	-0.133655	-0.22	-0.212
1700101E01Rik	0.15835	0.516129									0.0355286	-0.260151		0.0776325	-0.137594	-0.0637434	-0.479695	-0.0376271	0.118807	0.0272517	0.101352	-0.0927989	0.0141706			-0.0698546	0.66					0.047	0.202
1700102P08Rik	0.197366	1	0.294152	-0.493588	0.563668	0.726982	-0.982298	-0.156797	0.095	-0.09	-0.203888	-0.119409	0.018565	-0.154341	-0.000763087	-0.110181	0.111328	-0.0821841	-0.0092669	0.0841811	-0.0419779	-0.0115974	-0.0632082	0.0633333	0.203333	-0.0510362	0.02	0.207063	0.0441897	-0.0237277	0.0133562	1.781	0.964
1700109H08Rik	0.0675558	0.387097		0.678072	-0.436295	0.389947	0.331206	-0.107283	-0.185	-0.3			0.0937519																	-0.00843334	-0.102065	-0.026	-0.445
1700112E06Rik	0.0681375	0.806452		-0.469078	0.509506	0.108808	0.206318	-1.12078	0.323065	-0.0588212	-0.107586	-0.233262		-0.00983728	-0.0787331	0.16229	0.0154556	0.0677516	0.0912966	0.0983706	-0.05575	0.10242	0.00425944			0.0939634	-0.406667			0.281896	0.0525664	0.273	-0.094
1700113H08Rik	0.0342451	0.806452		0.303781	0.179484	-1.05297	-0.254251	0.0727081	0.499457	-0.362987	-0.0374814	0.179925		0.00852758	0.00709057	-0.0290488	-0.18385	-0.0535308	0.0531252	-0.12023	-0.0721857	-0.035159	0.0949949			0.0121778	0.0333333			-0.0822927	-0.162487	0.234	0.299
1700122O11Rik	0.0659962	0.741935		-1.9957	2.20436	-1.54057	3.14405	0.60026	1.805	0.07	-0.159904	-0.0831271		-0.164897	-0.0241238	-0.115264	-0.344013	0.0481562	0.0116503	0.0640322	0.440475		-0.0627317			0.135728				-0.0521843	-0.0469375	-0.171	-0.786
1700123I01Rik	0.0961245	0.806452		-0.678072	-0.547488	-0.269058	-1.22239	0.105532	0.505	-0.195	0.182551	-0.0577409		-0.0140088	-0.133509	-0.0743088	0.0699638	0.293955	-0.0643564	-0.074831	0.143243	0.0303291	0.0483735			0.0790933	0.0166667			-0.00619149	-0.155325	0.202	0.361667
1700123K08Rik	0.28585	0.967742		-1.0152	1.01878	0.184425	3.20294	-0.16124	0.33	0.115	0.226732	-0.167305	0.00844239	0.235555	-0.0227266	-0.343891	-0.509317	0.31614	-0.0316945	0.11806	0.0576131	-0.0133146	0.00786828	0.05	0.0866667	0.0751067	-0.02	0.0794781	-0.122566	0.0536883	-0.208304	-0.244	0.376
1700123L14Rik	0.0748866	0.83871		-1.52655	-2.13972	3.68326	4	-0.04491	0.255	-0.125	-0.0159195	0.16717	-0.0273387	0.0468142	-0.223491	-0.0151457	-0.112839	-0.0820084	-0.0344888	-0.121465	0.201615	0.0371324	0.0474454			-0.0223675	0.03			-0.0179524	-0.0281262	-0.5255	-0.21
1700123O20Rik	1.36021	1	-0.26407	-0.174857	-0.330721	-0.176253	0.468675	-0.0664667	-1.11	0.205	0.0554645	0.20043	0.278454	0.202544	0.196986	-0.014451	0.258288	-0.37721	-0.105635	0.125775	0.197276	-0.118677	-0.0164993	0.146667	0.296667	0.229893	-0.0466667	0.0433255	0.178228	0.356464	0.111852	0.172	0.395
1700125H20Rik	0.0863205	0.83871	0.326538	-0.857981	-0.834941	-0.415037	0.36257	-0.06871	0.665	-0.165	-0.0454017	0.0158306		-0.0562655	-0.0945587	0.0366613	-0.153658	-0.0783851	-0.0545444	0.137954	0.086153	0.00106336	-0.0261043			-0.0421974	-0.01			0.0449159	-0.0247633	-0.391	-0.631
1700129C05Rik	0.186625	1	0.0906061	0.912224	0.738209	0.716207	-0.535719	-0.227962	0.55	-0.09	-0.325412	0.11242	0.0233404	-0.0662022	-0.0904851	0.00704023	0.0706542	-0.252778	0.154808	0.0421408	-0.0518406	0.0814143	0.121677	0.0633333	0.0966667	0.141768	0.163333	0.11791	0.0354299	0.122437	-0.202751	-0.887	0.17
1810009A15Rik	1.91699	1	-0.884321	-0.270979	-0.0373987	-0.381871	0.184034	0.0844833	-0.18	0.4	-0.205443	-0.0718696	0.508688	0.00607107	0.109113	0.191551	0.0607434	-0.288916	-0.169975	-0.185059	-0.0135239	-0.455593	-0.0140062	0.0833333	-0.0633333	0.040312	0.143333	-0.467413	-1.36874	-0.0966206	-0.717776	-0.113	-0.382
1810009J06Rik	0.0654725	0.516129									0.0274915	0.126892	-0.00282465	-0.238896	-0.162878	-0.384592	-0.0614468	-0.0798979	-0.0052446	-0.197622	0.14531	-0.0956274	0.0222226			-0.113308						-0.1365	-0.1295
1810009N02Rik	0.627861	0.419355		-0.324873	-0.109697	-0.308241	0.302769	-0.428925	0.715	-0.49			-0.226563														-0.213333			-0.0107064	0.0519104	-0.08	-0.19
1810011H11Rik	0.0543034	0.806452		-0.745186	0.450033	0.745954	0.291847	0.308566	0.122987	-0.0800262	0.0560179	-0.0896012		0.32176	-0.160627	0.0465537	-0.0880941	0.0569139	0.0382373	0.0702713	0.0115744	-0.113132	0.0256337			0.000116979	0			0.0576318	0.050832	0.031	0.161
1810011O10Rik	2.23617	1	-0.010376	0.470567	1.10309	2.52949	0.622787	-0.696201	-0.392067	0.698898	0.994497	1.31483	2.03465	0.384284	0.667442	0.275987	0.299414	-0.410603	0.474332	0.740358	0.643186	0.912909	-0.941088	0.04	0.0166667	0.967073	1.20667	0.728416	0.576801	-0.945846	-0.476943	0.3035	1.316
1810013L24Rik	1.77145	0.806452		-0.222701	-0.0525147	0.0391161	0.654351	-0.516796	-2.0935	-0.125002	0.381404	0.34001		0.0185441	-0.06854	-0.0986531	-0.1444	0.06622	0.076882	0.161645	0.0995389	0.128305	-0.406287			0.0116948	0.136667			0.511257	0.269727	0.174	0.549
1810022K09Rik	1.0355	0.806452		-0.347812	0.323033	0.00491626	0.357492	-0.238008	-0.632498	0.815317	0.0215764	0.099347		0.144153	-0.0311065	-0.120798	0.0304641	-0.101624	-0.0291709	-0.0297518	-0.0548067	0.0531292	-0.0813484			0.0859704	0.126667			0.183713	-0.165677	-0.1385	-0.262
1810024B03Rik	0.070047	0.548387	0.00899994								0.135729	-0.11792		0.500601	-0.239501	-0.0817131	-0.302653	0.110908	-0.145747	0.111868	0.122179	-0.220674	0.27096			0.07548	0.326667					0.27	0.378
1810026J23Rik	0.665751	0.967742	-0.352877	-0.187034	-0.434184	-0.671214	0.162921	-0.663884	-1.07748	-0.750588	-0.136692	-0.0772413	0.0954613	-0.0479392	0.139722	-0.133805	0.166762	0.0827501	0.136899	-0.100197	0.0933244		0.0636917	-0.0966667	-0.153333	0.369058	-0.0933333	0.133764	0.393384	-0.0949261	-0.22396	0.089	0.151
1810030O07Rik	0.930838	1	-0.317986	-0.166529	-0.20214	-0.514225	0.3174	0.0120938	-0.772997	0.280931	0.128225	0.478884	0.0532997	-0.0783089	0.147602	0.113315	0.089049	-0.236594	0.0861033	0.0932175	-0.0126102	0.196626	-0.149648	-0.08	-0.09	-0.127451	-0.0133333	0.0168271	-0.0928536	0.189037	0.304106	-0.008	0.417
1810032O08Rik	0.524979	0.967742	-0.869271	-0.371234	0.199007	0.36376	0.31894	-0.187259	2.4026	0.776734	0.237412	-0.0584406		-0.135522	-0.118541	-0.0859676	0.223975	-0.0487297	0.357298	-0.447481	-0.27975	0.269173	-0.60652	-0.33	-0.0533333	-0.0157768	-0.116667	-0.148053	-0.456259	0.19805	-0.648079	-0.4265	-0.6745
1810037I17Rik	4.07651	0.806452		-0.128075	-0.0907602	-0.15429	0.30043	0.192583	-0.67	0.41	-0.0877357	0.170176		-0.291242	-0.388456	0.226178	0.170503	-0.0945042	-0.232769	-0.15474	-0.219018	-0.0178055	0.411808			0.15779	0.22			-0.0525565	-0.778486	-0.0316667	-0.152667
1810041L15Rik	0.135443	0.806452		0.895692	-0.265197	0.195985	0.596317	0.276305	0.699985	-0.446247	-0.0634509	0.037879		0.241902	-0.183561	-0.141815	-0.300363	-0.0606573	0.0370079	-0.0411113	0.106165	-0.0824973	-0.0778082			-0.0490326	-0.286667			0.0147808	-0.121902	-0.2865	-0.096
1810043G02Rik	0.673833	1	-0.394417	-0.115332	-0.233948	-0.615575	0.603935	0.0720735	2.38826	0.871933	-0.358454	0.182151	-0.149243	-0.163168	0.125323	-0.0568629	-0.113973	-0.493146	-0.119955	0.231249	0.21239	0.158409	0.445637	-0.106667	-0.123333	-0.18398	-0.166667	-0.0293346	-0.0520099	-0.691045	-0.468864	-0.06	-0.359
1810043H04Rik	2.07908	0.354839		0.0597955	-0.270544	-0.391902	-0.027414	-0.388662	0.868463	-0.0600544																				-0.362842	-0.167186	-0.285	-1.081
1810046K07Rik	0.132508	0.806452		-2.07325	-1.41923	1.99262	3.17834	-0.005785	0.335	-0.17	0.240202	-0.109989		0.0216824	-0.248239	-0.187584	-0.123184	0.206515	0.114669	-0.0650159	0.0441227	-0.0489722	-0.0996657			0.0341398	0.0466667			-0.0350626	-0.0655291	-0.302	-1.033
1810055G02Rik	1.64078	1	0.118146	-0.229708	0.0837545	-0.358157	0.814772	1.43144	0.05	0.26	0.141818	0.219824	0.610906	0.123343	0.0114771	0.213339	0.00862774	-0.0337838	0.0912743	-0.02246	-0.0317215	-0.0431515	-0.400353	-0.193333	-0.0466667	0.623695	0.226667	0.114251	0.60966	0.321759	-0.608569	-0.174	-0.471
1810058N15Rik	0.120089	0.741935		-0.126141	-0.178501	1.20436	-1.078	-0.259523	0.575	-0.36	0.126568	-0.426864		0.509673	-0.13762	-0.22925	-0.0955835	0.22187	-0.105995	-0.145269	0.350018		0.0182775			-0.899117				-0.00891209	0.00811434	0.057	-0.965
1810062G17Rik	0.110549	0.741935		-0.437809	-1.03279	-0.351472	1.35755	0.559248	0.405	0.11	-0.25194	0.0933657		0.198911	0.050008	0.196884	-0.38258	0.491433	0.634776	-0.0414263	-0.131988		0.110625			0.0865107				0.0887625	-0.358357	0.226	-0.398
1810065E05Rik	0.170444	1	0.0299974	0.371559	-0.97059	-0.646363	0.903937	-0.46483	0.025	0.005	0.0382912	-0.138396	-0.0567109	0.0263862	-0.0978374	-0.201839	-0.0501893	0.047085	0.076367	0.157559	0.100884	0.0624191	-0.0945674	-0.14	-0.0166667	0.0396956	0.0533333	0.0459276	0.0126484	0.0492508	-0.0389674	-0.258	-0.616
2010001E11Rik	0.0712652	0.806452		-0.669851	0.304855	0.667425	0.459432	-0.31592	0.46	0.05	0.134297	-0.300026		0.18762	-0.117449	-0.2313	-0.413141	0.180538	-0.262594	0.104297	0.164494	0.04285	-0.0269413			-0.0204782	0.126667			-0.0596167	-0.0598882	1.367	1.062
2010003K11Rik	0.134654	0.967742	0.0808402	-0.942515	-2.78759	1.57719	-0.194378	-0.27828	0.6	0.445	0.073142	-0.0785096		0.160544	0.0214204	-0.157462	-0.00719449	0.254567	-0.126974	0.0309513	0.0648425	0.0610674	-0.0290535	-0.243333	-0.0166667	0.0499076	0.11	0.103448	-0.0243562	-0.0440717	-0.0190475	0.168	-0.294
2010005H15Rik	0.0380573	0.870968	-1.16128	2.2303	0.383329	-1.848	-2.34395	0.788575	0.145	-0.03	0.313402	0.241407	0.0322676	-0.214592	0.192218	-0.153338	0.084122	0.126295	0.207723	0.130764	-0.0526322	-0.0271436	-0.137447			-0.0180345	-0.17			-0.0013423	-0.420115	0.076	-0.075
2010106E10Rik	0.0695941	1	-0.231024	-0.14439	4.02237	-2.80735	-3.39232	0.03764	0.05	-0.11	0.0670654	0.126236	0.0392728	0.209671	-0.11319	-0.0434416	-0.0291373	0.0953772	0.0375261	-0.0497333	0.0697649	-0.0453355	0.196384	0.0133333	0.213333	0.0715149	0.04	0.135748	-0.0470311	-0.00847459	-0.0046308	0.042	0.236
2010107E04Rik	4.96434	1	-1.05785	-0.181515	0.0683563	-0.294843	0.239466	-0.636833	0.02	0.555	-0.247495	-0.00411738	-0.150955	0.0538163	0.276494	-0.0183224	0.583536	-0.32591	-0.286863	0.0618583	0.339905	-0.121248	0.601827	0.0766667	0.526667	-0.13656	0.2	-0.041473	0.0712539	0.0429182	0.0634203	-0.042	0.061
2010107G12Rik	0.0880149	0.870968	0.298191	-0.759567	-1.16636	1.85561	2.58496	-0.244323	0.64	0.445	0.0263596	0.304348	0.407723	0.262931	-0.151159	-0.0836835	0.0871596	-0.0711788	0.0173634	0.307779	0.395581	0.0213199	0.0147149			0.0695138	0.2			-0.0317814	-0.237016	0.486	0.769
2010107G23Rik	0.525813	1	-0.0546025	0.0492751	0.645335	0.358192	-0.127148	-3.74201	0.325	-1.2	-0.0591495	-0.204438	0.00707601	-0.228046	-0.725449	-0.299286	-0.308351	0.228106	-0.269854	-0.0867906	-0.0288967	-0.0526681	0.20227	0.09	-0.196667	-0.179963	-0.18	-0.240751	-0.637951	-0.975883	-0.302583	-0.426	-0.764
2010109A12Rik	0.051332	0.741935		-0.40162	0.263255	-0.0742013	1.93557	0.0364761	0.388563	-0.186936	-0.163701	-0.15077		0.179829	0.0271438	0.0074614	0.0308017	-0.0804814	0.0959123	-0.19296	0.0206275		0.112699			-0.00171125				-0.0661604	0.029075	0.132	-0.224
2010109I03Rik	0.257287	1	0.479772	1.65355	-1.21775	1.55639	-0.580097	0.28799	0.665	-0.31	0.195031	-0.0340654	-0.0668672	-0.169332	-0.91037	0.269502	-0.647969	0.106777	-0.260083	-0.102	-0.1073	-0.0233236	-0.0109062	0.13	-0.0333333	0.0480871	-0.07	-0.0806238	-0.00831123	-0.265056	-0.271508	0.231	0.501
2010111I01Rik	0.511316	1	-0.783348	-0.646919	-0.131454	-0.684711	1.21602	-0.855006	-0.0851171	-0.106984	0.405139	0.074638	0.277001	0.328862	0.293439	0.00153027	0.44481	0.177426	0.0265924	0.200659	0.255703	0.00699858	0.215414	-0.0966667	-0.21	-0.61769	-0.473333	0.474968	1.40155	0.240713	0.113797	-0.0615	0.336
2010300C02Rik	0.171849	0.83871	0.4335	-1.24735	-4.01792	-2.53172	0.0531113	-2.48438	0.11	0.225	-0.278564	-0.455569		-0.113147	-0.0980729	-0.277057	-0.559528	0.0878804	0.130258	0.204806	0.181313	-0.000232398	0.0891779			0.148399	0.126667			-0.233588	-0.0903192	0.171	-0.305
2010315B03Rik	0.492256	0.354839		-0.469461	-0.323742	-0.434293	0.00337157	-2.94316	-0.73	-0.03																				-0.462291	0.652714	-1.071	0.375
2200002D01Rik	2.63389	0.774194		0.123162	1.69114	-0.476957	0.306786	-0.168233	0.28	-0.26	-0.244593	-0.152333		0.0566135	0.015512	0.0604471	-0.0184171	-0.317108	-0.41294	-0.213259	-0.0620212	-0.160169	-0.146101			-0.206956				-1.46696	-0.783529	0.09	-0.021
2200002J24Rik	0.11161	0.83871	0.226305	0.75983	0.0746388	0.00213891	1.37914	-0.0356133	1.1	0.25	0.200154	-0.0457872		0.0438065	0.211414	-0.106248	-0.0487817	0.183579	-0.101531	-0.0116977	0.0841825	0.0066023	-0.105613			-0.0724127	0.123333			0.0640373	-0.352243	-0.591	-0.545
2210010C04Rik	0.147	1	0.071087	0.176533	1.4483	-0.167863	2.81572	-0.207414	0.894476	-0.277711	-0.232006	0.134523	0.0221372	-0.200115	-0.00298928	-0.095553	0.0192593	-0.0378646	-0.0777423	0.251938	0.0294271	-0.0627702	0.00557715	-0.143333	0.01	-0.0272705	0.0933333	0.049142	-0.0382044	-0.0967476	-0.0700506	0.541	-0.028
2210011C24Rik	0.555323	0.741935		-0.79864	-0.227471	-0.948691	-2.38827	0.216898	-0.26	-0.54	-0.912377	-1.38138		-0.347697	-0.143674	-0.521974	-0.735692	-0.0779812	0.0572294	-0.680582	-0.426088		0.328663			-0.397663				-0.983296	0.471159	0.081	-1.415
2210016F16Rik	0.549362	0.935484		-1.07028	-0.798344	-0.233113	0.155166	0.389849	0.0937879	-0.177508	-0.243541	-0.269219		0.0672576	0.00560685	-0.0552177	0.2912	-0.0605752	0.100827	0.148709	0.102168	-0.085133	-0.0832781	0.09	0.05	-0.479157	0.08	0.168741	-0.0941879	0.377754	0.116422	-0.934	-0.746
2210016L21Rik	1.04398	0.580645	-0.61651	-0.378866	-0.506549	-0.619693	0.127656	-0.817828	1.165	0.33			-0.201421											-0.03	0.0733333		-0.37	-0.0873157	0.0816568	-0.312701	0.195492	0.035	0.235
2210017I01Rik		0.0645161																														-0.098	-0.053
2210018M11Rik	0.90517	0.967742	0.0684971	-0.103317	-0.626035	0.343635	0.291519	-0.586936	-0.590008	0.296256	0.312388	0.0754174		-0.0115094	0.10707	-0.0145312	-0.107586	-0.49983	-0.417932	-0.00792816	-0.276714	0.0499972	-0.0513066	-0.26	-0.07	0.292348	0.206667	-0.0298773	-0.183279	0.219073	0.0872084	-0.174	-0.253
2210407C18Rik	0.0799063	1	-0.102276	-0.868755	-0.793362	-0.155651	0.839247	0.119938	0.37	-0.42	-0.0457153	-0.083313	-1.25248	-0.0341681	-0.368649	0.043527	-0.0441849	0.057049	0.0510424	0.259095	0.0819728	-0.167186	-0.142997	0.156667	0.213333	-0.044012	0.113333	0.11428	0.0300759	-0.0187261	-0.084075	0.054	-0.135
2210408I21Rik	0.122281	0.83871	-1.12917	0.221079	0.149078	-0.745683	2.12	-0.0466883	-0.325	0.13	0.316561	0.296404		0.156407	0.38243	0.252774	0.26712	-0.252479	-0.198596	-0.156152	-0.157958	0.324188	0.240727			-0.469525	-0.243333			0.00281477	-0.154661	-0.03	0.4445
2210418O10Rik	3.23388	0.0645161											-0.103497														0.0266667
2300002M23Rik	0.0942943	0.870968	0.950527	-0.341037	0.0458037	0.131245	1.16993	-0.0530083	0.435	-0.465	-0.324575	-0.431623	0.136737	0.0678714	-0.127439	-0.208657	-0.2471	-0.0501032	0.235831	-0.0979444	-0.0838201	-0.015227	0.110962			0.027346	0.0666667			0.0693778	0.121384	0.8	-0.01
2300003K06Rik		0.0645161																														0.145	-0.307
2300005B03Rik	0.282639	0.548387									-0.0412317	-0.11204	0.0112634	0.620942	-0.398041	1.41304	0.709634	-0.0386313	-0.193064	0.198894	0.0957469	0.00785609	-0.0245078			-0.0497099	-0.293333					0.143	-0.282
2300009A05Rik	0.360698	0.806452		-1.36753	-0.391022	1.14505	0.69692	-0.0940858	1.03925	1.10386	-0.0349641	-0.233282		-0.0739506	-0.0635895	-0.244868	0.170303	0.00405149	-0.130906	-0.19521	-0.0850966	-0.0161097	-0.00102038			-0.0773082	0.35			-0.202723	-0.195798	-0.039	-0.514
2310002L09Rik	0.0619136	0.870968	0.66201	-0.109973	3.01741	1.25771	1.88814	0.664136	0.424526	-0.057267	0.00367183	0.159993	-0.00679327	-0.014936	-0.0479425	-0.13535	-0.0378444	0.0622711	-0.0658509	0.168259	-0.0426395	-0.0785856	0.039903			-0.0703766	-0.136667			0.00212806	-0.0793043	0.3995	-0.2875
2310003L06Rik	0.0237651	0.451613									-0.0768675	-0.00922466		0.0294347	0.00482352	0.145739	-0.136223	-0.0469066	0.111138	0.0912754	0.0376593		0.08162			-0.0738937						0.805	1.015
2310007B03Rik	2.20675	0.870968	2.56097	-0.921711	-1.09516	1.24839	3.44186	-0.316292	-3.25	-1.48	3.01049	2.95741	1.04042	-0.535838	0.149201	-0.562725	0.300732	0.266405	-0.183291	2.74876	2.75652	0.0999756	1.49906			1.84526	1.4			1.12355	-0.999787	-0.598	-3.464
2310009B15Rik	0.416614	0.387097		-0.311573	-0.484447	0.270137	-0.308406	-0.634569	1.58718	0.843467																	-0.38			-0.428163	0.0149058	-0.0255	0.098
2310011J03Rik	1.03857	1	-0.566789	-0.0922896	-0.261289	-0.368525	0.298606	0.290958	-0.955	-2.125	-0.234842	0.00398716	9.6491e-05	-0.0311236	-0.266953	-0.100747	0.21014	-0.379632	-0.0734279	0.00819899	0.169817	-0.13964	0.0694391	0.02	-0.0866667	-0.211574	-0.0366667	-0.00848881	-0.16891	0.171558	-0.14751	-0.049	-0.912
2310022A10Rik	0.58763	1	-0.529249	-0.661822	-0.492914	-0.0786524	0.422148	0.223417	-0.295	-0.95	-0.229249	-0.195682	-0.0206482	0.164901	0.09017	0.217437	0.102269	-0.330401	-0.234436	-0.347411	-0.193192	-0.143774	0.473757	-0.0633333	0.09	-0.234551	-0.356667	-0.151522	-0.277238	-0.143166	-0.277951	-0.034	0.284
2310022B05Rik	2.02259	0.870968	0.0892962	0.141262	-0.579888	-0.798481	-0.152677	-0.206748	-1.1	-1.185	0.0675565	0.082078	-0.0783281	-0.0359222	-0.375631	-0.121403	-0.204696	-0.4743	-0.492073	0.0756157	-0.0597835	0.187007	0.212046			-0.409223	-0.49			0.275238	1.16605	0.243	0.977
2310030G06Rik	1.00903	1	0.115047	-0.212908	-0.388036	-0.446443	0.205606	-2.8856	-0.28	1.315	0.469675	0.417096	-0.00976721	0.226106	-0.0675456	0.338926	-0.120239	0.253021	0.44262	0.304677	0.256683	-0.133675	0.33552	-0.136667	-0.17	-0.404914	0.113333	0.259426	0.604553	0.0413938	0.0396662	0.173	-0.559
2310033P09Rik	0.539737	1	-0.729027	-0.395536	-0.222017	-0.116838	0.487511	-0.443846	-0.361374	-0.306943	-0.0621165	-0.193519	0.033268	-0.0551028	-0.0487624	-0.0603349	-0.0581804	-0.220949	-0.150864	0.0368425	-0.153829	-0.132041	-0.138819	0.0433333	-0.143333	-0.135949	0.00333333	-0.23603	-0.788783	0.171625	-0.328739	-0.126	-0.442
2310034C09Rik	0.0428334	1	0.394029	-3.75002	0.303392	-0.39402	1.67243	0.113257	0.43	0.25	-0.0186903	-0.0821401	0.0642136	0.00167399	-0.0033119	-0.0441001	-0.0128625	-0.127036	-0.214698	0.00570976	0.016948	-0.0338164	-0.0693167	-0.116667	0.203333	-0.053297	-0.0833333	-0.0081117	-0.0679515	0.0713453	-0.0610484	0.24	-0.073
2310035C23Rik	0.67653	0.870968	-0.319149	-0.476067	-0.0842059	-0.733739	0.346163	-0.345816	-0.187962	-0.321446	-0.109082	0.276463	0.0834586	0.115445	-0.116628	-0.0554587	0.284066	-0.00143587	0.186435	-0.0586888	-0.0878289	0.0631953	0.026836			0.0354778	0.106667			0.0586223	0.0862564	-0.175	0.156
2310036O22Rik	5.74224	1	-0.0910168	-0.120554	-0.225852	-0.021266	0.340646	-0.04017	0.07	0.075	-0.0838084	0.0270882	0.188941	-0.180207	-0.272255	-0.00127707	-0.00553027	-0.217203	-0.103121	-0.0460807	-0.0442	-0.197208	-0.10379	-0.19	-0.473333	0.227292	-0.0866667	0.0301679	0.0403123	0.108686	-0.124246	0.095	0.285
2310039H08Rik	1.93152	1	-0.732981	-0.487709	-0.176613	-0.876767	0.0125562	-0.448478	0.735	-0.505	-0.438335	0.0660107	-0.179767	-0.0731718	0.0442945	0.228709	0.264239	-0.412905	-0.43313	-0.22336	-0.137764	0.332617	-0.044034	-0.103333	0.0366667	-0.410559	-0.183333	-0.296685	-0.462886	-0.894891	-0.229256	-0.083	-0.383
2310047K21Rik	0.16186	0.354839		0.147419	-0.760049	-0.122445	0.43915	-1.57543	-1.645	2.385																				-0.858978	-0.197296	0.248	0.335
2310050C09Rik	0.350884	0.483871		-1.19265	-0.206451	-1.76553	1.71272	0.349665	0.635	-0.565														0.0466667	0.313333			-0.0920865	-0.00893485	0.0483	-0.234378	0.096	-0.083
2310057J18Rik	0.0712733	0.645161	-0.0130039								-0.0453523	-0.18637	-0.108739	-0.160762	-0.0101932	-0.0541989	0.127121	0.0670448	0.0162145	-0.0520499	0.00137594	-0.116023	0.0163359	-0.08	-0.196667	0.0368582	-0.00666667					-0.367	0.114
2310057M21Rik	0.873381	0.870968	-0.227825	-1.06235	-0.123734	0.0468639	1.69483	-0.381951	-0.00982419	-0.105842	0.155737	-0.00788632	-0.00338125	-0.00879325	-0.305646	0.058189	0.253734	0.239044	-0.0916782	0.0385103	-0.102847	0.255947	-0.465461			0.209588	0.0466667			0.0466208	-0.513695	-0.202	0.106
2310057N15Rik	0.0552816	1	-0.156835	0.515422	-0.14439	-1.73272	1.16993	-0.107283	0.135	0.175	-0.0318248	0.00429853	0.0468468	0.215952	0.0585891	0.0591012	0.138943	-0.161356	-0.0128177	-0.0357469	0.233262	-0.103347	0.106055	0.166667	0.21	0.0389475	0.0666667	0.272214	0.0215312	-0.00372708	-0.186328	0.189	0.025
2310061I04Rik	1.73178	0.935484		-0.310333	0.0609409	-0.322494	0.454554	-0.167652	1.66579	0.1558	-0.165373	-0.31017		-0.256152	-0.302168	-0.20203	-0.31448	-0.0227808	0.134687	-0.357441	-0.392691	-0.108744	0.0631823	0.263333	0.1	-0.288577	0.236667	-0.438377	-0.387563	-0.600569	-0.651292	-0.06	-0.256
2310061N02Rik	0.102922	0.806452		-1.94123	0.38529	0.246231	0.925269	0.328583	1.185	-0.35	-0.0365189	-0.00289953		-0.265365	-0.267336	-0.194265	-0.0695632	0.0191945	0.173067	0.25179	-0.0196138	-0.20104	0.0316506			-0.056222	-0.07			-0.0548098	-0.151928	0.322	0.429
2310067B10Rik	1.1313	1	-0.341808	0.350743	0.0980742	-0.986474	0.0662483	0.0732317	0.535	-0.75	-0.113564	-0.270909	-0.373176	-0.162923	-0.243215	-0.281173	-0.409213	0.16269	0.147263	-0.132081	-0.188035	0.294139	0.207365	-0.0766667	-0.206667	-0.068426	-0.05	-0.0720726	0.0311219	-0.128669	0.372395	0.184	-0.596
2310079G19Rik	0.127585	0.806452		0.0548839	-0.177032	-0.914482	0.214275	0.0349217	0.64	-0.135	0.0813415	-0.0572595		0.024564	-0.107971	-0.119448	-0.353731	0.112426	0.230418	0.299424	0.263871	0.0764794	-0.0654586			0.110917	0.106667			-0.0131137	-0.0489659	-0.088	0.121
2410002F23Rik	0.907904	0.870968	-0.498495	-0.288027	0.0144954	0.47899	0.461918	-0.58478	0.35	-0.71	0.236817	-0.0946994	0.531544	-0.00296398	-0.219238	-0.0897645	0.0862054	0.0865583	0.193533	-0.330243	-0.290906	0.0582985	-0.841804			0.588627	0.38			0.0438938	-0.924309	-0.338	-0.0085
2410004B18Rik	1.24467	1	-0.961623	-0.4116	-0.422161	-0.42203	0.0998771	-0.306622	0.06	0.755	-0.272143	-0.190726	0.0112622	0.0394234	-0.140741	0.101438	0.255589	0.175384	0.232019	-0.095011	-0.00672561	-0.105664	-0.107857	0.0133333	0.11	-0.0612025	-0.0966667	-0.387253	0.0195269	-0.179067	-0.804423	-0.085	-0.219
2410004P03Rik	0.144813	0.741935		-0.315042	-0.321219	-0.577976	0.796966	0.343287	0.325	-0.55	-0.086028	-0.128112		0.246324	-0.127518	0.0577209	-0.448921	0.03165	-0.137638	0.197092	0.156313		-0.0424072			0.025889				0.0892894	-0.0644381	-0.453	-0.935
2410015M20Rik	1.31831	1	-0.425831	-0.94372	-0.571202	-0.482587	-0.879803	-0.302258	0.153646	-0.419307	-0.240951	0.170085	-0.176983	-0.0369053	0.182136	0.0644053	0.517738	-0.305998	-0.0976432	-0.162113	0.370697	-0.0381978	0.284085	0.14	-0.116667	-0.117689	-0.0466667	-0.0559001	-0.301472	-0.026952	0.0393178	0.163	0.651
2410016O06Rik	0.550501	1	-0.385819	-0.00386782	-0.112114	0.143116	0.424305	-0.673548	-0.69	-2.06	0.0154981	-0.0320385	0.425616	0.0291811	-0.176216	-0.110325	-0.0100769	-0.106108	-0.224103	-0.0701704	-0.0267559	-0.0774404	-0.0947107	-0.17	-0.106667	0.0225895	0.0266667	-0.309311	-0.607236	-0.000741482	-0.212109	-0.082	-0.008
2410089E03Rik	0.532168	0.83871	-0.0889605	-0.14345	0.0325726	-0.175193	0.11988	-0.052855	0.187181	0.0752374	0.331719	0.573334		0.415675	0.360911	0.00794902	0.142983	0.0253181	0.125265	0.261554	0.0869437	0.0201538	0.0322812			0.0211095	-0.01			0.00176218	0.122044	-0.166	0.214
2410124H12Rik	0.063698	0.741935		1.25054	-0.415037	-0.314109	-1.88753	0.507117	0.485	0.205	-0.109189	-0.0698972		-0.0157178	-0.0674213	0.0247655	-0.160256	0.165157	0.0220593	-0.102433	0.0820882		-0.0481365			-0.0114748				-0.501299	-0.0420432	0.353	0.49
2410131K14Rik	0.467357	0.806452		-0.148968	-0.656995	-0.404008	0.159352	0.623627	-0.12422	-0.82129	-0.121149	-0.166366		-0.0570433	0.113353	-0.181495	0.271468	0.0494111	0.15088	-0.0179271	-0.186239	0.763027	-0.548796			0.154025	-0.08			0.090538	0.12388	0.086	-0.259
2410137M14Rik	0.119591	0.870968	0.309112	0	-0.0093987	-0.0135647	0.75945	0.0692133	0.385	-0.425	-0.0554141	0.0790724	0.0694109	-0.207334	0.232211	-0.377398	-0.267487	0.108601	0.0671078	0.168211	0.0918846	-0.12452	-0.0327243			-0.067219	0.103333			-0.132275	0.028626	0.429	-0.402
2410141K09Rik	0.040973	0.0967742	-0.0155516																													0.0705	-0.5515
2510002D24Rik	1.04133	0.935484		-0.306592	-0.101104	-1.0505	-0.0680332	-0.705335	0.485	0.77	-0.440364	0.0583739		-0.373555	-0.390661	-0.435241	-0.208268	-0.37124	-0.165701	-0.165149	-0.222378	-0.101536	0.293966	0.0366667	0.1	-0.920324	-0.14	-0.348011	-0.298617	-0.375965	0.255191	0.159	-0.591
2510009E07Rik	0.240764	1	0.129891	-1.32669	-1.21487	1.27838	0.917418	0.676036	0.612639	-0.487925	0.107096	-0.171644	-0.0719334	0.0218932	0.0490476	-0.142104	-0.264789	0.214704	-0.0565806	0.109208	0.00631237	0.0106358	-0.044774	-0.0566667	0.113333	0.105699	0.0633333	-0.0270643	-0.11312	-0.0144506	-0.170453	1.212	3.257
2510039O18Rik	1.74334	1	0.0900934	-0.206909	-0.102153	-0.39982	0.430591	1.11626	-0.35875	-1.9023	0.269354	0.223236	-0.111729	-0.0893167	-0.225558	0.0661028	0.0321145	0.20563	0.239483	0.265395	0.0451472	0.0322693	0.0701748	-0.11	-0.116667	0.0756571	-0.0633333	0.198743	0.388629	0.0565356	0.267984	-0.019	-0.508
2610001J05Rik	1.11115	0.967742	-0.332099	-0.16322	0.278297	-0.0543138	0.902852	0.250519	-0.699151	-0.27193	-0.119893	-0.00446439		0.0918933	0.506801	0.195162	0.257144	-0.035587	-0.0852132	-0.399192	-0.438947	-0.201986	-0.0907094	-0.223333	-0.00666667	-0.160256	0.15	-0.270566	-0.633733	-0.111598	-0.170826	-0.227	0.244
2610002M06Rik	0.57502	1	-0.764495	-0.516568	-0.177417	-0.224736	0.235073	-0.624663	-2.04333	-0.437241	0.101882	0.126002	-0.245814	-0.201033	0.260447	0.161326	0.182699	-0.359319	-0.211615	-0.0904629	-0.184814	0.172613	0.232024	0.33	0.633333	-0.442817	-0.186667	-0.171314	-0.0347516	0.150717	0.492243	-0.269	-0.0685
2610005M20Rik	0.0291645	0.354839		-1.87447	1.16183	1.76988	0.621488	-0.230752	0.55	0.19																				5e-10	-0.00271606	-0.763	-0.669
2610008E11Rik	0.447457	0.83871	-0.801407	-0.916084	-0.778703	-0.492418	-0.156814	-1.24387	-0.425	0.51	0.118078	0.219303		0.288716	0.285972	0.0630785	0.266619	-0.123483	0.090635	0.025049	-0.0163183	0.317318	0.433862			-0.657359	0.12			0.258365	0.624324	-0.196	0.939
2610015P09Rik	0.313457	0.903226		-0.52487	0.00642722	-0.496831	-0.464354	-0.311094	0.312088	0.034743	0.00114131	0.047575		-0.0604568	0.0895999	-0.0556716	-0.274768	0.0492855	0.0721517	0.0922095	-0.122151		-0.0492108	0.0166667	0.236667	-0.53988	0.00666667	-0.0467038	-0.194424	0.0202526	0.0295734	0.1155	-0.112
2610020H08Rik	0.100223	0.870968	-0.471556	-0.596396	-0.128177	0.57886	1.15876	-0.643997	-0.0829023	-0.0784051	-0.204016	0.0654018	-0.0695092	-0.08547	0.182409	-0.16744	0.302274	0.173426	-0.0551393	-0.263541	-0.228289	-0.144678	-0.187538			0.0133452	-0.126667			-0.10604	-0.228273	0.027	0.249
2610021A01Rik	0.356993	0.354839		-0.7601	0.467842	0.58334	0.818181	-1.63372	-1.6398	0.475571																				-0.00823643	-0.539569	-0.006	0.3
2610028H24Rik	0.139638	0.83871	0.234005	-0.21818	-1.05565	0.415037	0.584963	-0.01593	0.785	0.18	0.0437037	-0.0840938	0.0264009	0.0941268	-0.119999	-0.156798	-0.389378	-0.0796065	0.00826846	0.109196	0.268584	-0.0442592	-0.0419983			0.0832329				-0.00483656	-0.0948446	-0.2535	-0.7505
2610042L04Rik	0.159701	0.0967742											0.0119449																			-0.191	-0.265
2610044O15Rik8	0.316217	0.0322581																									0.27
2610301B20Rik	0.610121	1	-0.0386219	-0.0980115	-0.603293	-0.269116	3.36084	-0.265492	-0.33196	0.125377	0.253546	0.111556	0.10823	0.0434421	0.533328	0.195779	0.520331	-0.371362	-0.255709	0.362646	0.397717	0.0934776	0.0614019	0.106667	-0.0333333	-0.00192462	-0.09	0.589756	0.604857	-0.121593	-0.168183	-0.0385	-0.026
2610301H18Rik	0.031838	0.290323		-1.43792	1.2076	0.665061	1.05821	-0.114392	0.355	0.37																				0.0118841	0.00438142
2610305D13Rik	0.26935	0.83871		-0.785168	0.897221	-0.0256334	3.61738	0.740413	-0.88	0.625	0.579145	0.218528	0.0981902	-6.24524e-05	0.0284167	-0.0267553	-0.0364432	-0.939272	-0.797885	-0.233293	-0.273434	0.0888696	-1.35081			-0.0786811	0.343333			0.573798	-0.188841	-0.216	-0.913
2610318N02Rik	0.10531	0.870968	-0.490259	-0.7633	1.60266	-0.0919575	0.602036	-0.0981467	0.6	0.02	-0.278353	0.0312531	-0.044249	0.0740546	-0.0562991	-0.0133769	0.0415069	-0.132237	-0.176932	0.0944079	0.157127	-0.42961	0.216531			0.894187	-0.05			0.277554	-0.115797	0.01175	0.023
2610507B11Rik	3.00564	1	-0.28092	-0.0717152	0.0877404	-0.469874	0.694793	-0.617336	-1.34174	-0.16252	0.0366903	0.236577	0.0925823	-0.15467	0.00696861	-0.0847203	-0.0432787	0.0718738	-0.00816285	0.0527371	-0.137803	-0.143882	0.1553	-0.0433333	-0.0266667	0.0331834	-0.163333	-0.0587309	-0.20234	-0.330461	0.287249	-0.059	-0.024
2610524H06Rik	0.789622	1	-0.741182	-0.326554	-3.09822	-0.866759	0.00857898	-1.04148	0.94	-0.195	-0.561886	-0.0254206	0.0209719	0.870927	0.314095	1.37223	1.1626	0.0125041	0.183184	-0.237813	-0.221972	0.0548986	-0.116609	-0.15	0.236667	0.366872	-0.876667	-0.220819	0.21121	-1.43255	-1.42483	-0.128	-0.19
2610528A11Rik	0.228409	0.935484		-0.310788	-0.096676	2.06559	-0.673772	0.355068	0.3	0.42	-1.67637	-0.995603		0.502051	-0.27899	0.242656	1.35648	-1.33886	-0.0717568	0.108987	0.370482	-0.0647787	-0.014626	-0.26	-0.196667	0.0116632	-0.773333	-0.553899	-0.904017	-0.0099299	-0.0564072	-0.268	-0.979
2610528J11Rik	0.251638	1	0.573053	-0.628564	1.52356	2.6865	1.5025	-2.97009	0.42	-0.33	-0.0386799	0.062029	-0.214741	-1.07805	-1.19838	-0.683093	-0.547143	-0.0636524	-0.0276218	0.267253	0.160547	-0.0124578	-0.0112374	0.14	0.163333	-0.237537	-1.46667	-0.0111221	-0.0931501	0.0110772	0.03493	0.049	-0.848
2700029M09Rik	1.66582	0.935484		-0.45177	0.103896	-0.058616	0.136607	-0.551807	-1.6	1.46	-0.329794	-0.464808		-0.0716155	0.567575	0.160082	0.206889	-0.344984	-0.447835	-0.343117	-0.302216	-0.712544	-0.205288	0.0366667	-0.406667	0.0430055	0.0966667	-0.895439	-0.668185	-0.042223	-0.795081	-0.116	-0.03
2700049A03Rik	0.56624	0.806452		-0.9562	-0.326928	-0.601842	0.513444	-1.29673	-0.0229973	-0.116152	-0.361062	-0.0743606		0.0593025	0.14912	0.180073	-0.0756906	-0.0803304	0.173884	-0.159174	-0.419773	-0.283552	0.468537			-0.176292	-0.196667			0.02881	-0.0067452	0.084	0.287
2700060E02Rik	4.36974	0.83871		-0.104078	0.166998	0.010754	0.331757	0.0253302	0.651723	1.70195	-0.0831032	0.0715602	0.128908	-0.227297	-0.377471	0.10335	0.0652454	0.0326349	-0.00904524	-0.0335131	-0.0623204	-0.13382	0.0202508			-0.116316	0.00666667			0.288952	0.235067	-0.024	-0.262
2700062C07Rik	0.633943	0.83871		-0.355005	-0.0488469	-0.391779	0.125308	-0.846838	0.87	1.05	0.102392	0.17078	0.144036	-0.328635	-0.0180432	0.01451	-0.0277428	-0.0727489	-0.0183362	-0.0619621	-0.0469724	-0.114024	-0.304286			-0.0377019	0.0333333			0.4504	-0.215002	0.051	-0.247
2700079J08Rik	0.930439	0.354839		0.135098	-0.423369	-0.182917	-0.0337488	0.091875	-0.885	-0.51																				0.208192	0.191711	0.249	-0.689
2700081O15Rik	0.490139	0.870968	0.400898	-0.104288	-1.0183	0.377879	0.619871	0.760658	-1.45	-1.555	0.482743	0.160738	0.0659576	0.0989803	0.190786	-0.0133994	-0.20908	-0.0219722	-0.156461	0.373783	0.360692	0.357121	0.236829			0.727054	0.153333			0.605201	0.458797	-0.124	0.25
2700094K13Rik	1.93458	1	-0.453937	-0.478921	-0.0469187	-0.330771	0.623297	0.664237	-0.515	-0.76	-0.0542322	-0.231331	0.810973	-0.0163092	0.270737	0.334266	0.65208	-0.238648	-0.134025	0.00958648	-0.0305261	-0.50453	-0.0442958	0.206667	0.226667	0.027776	-0.06	-0.629239	-1.15449	0.107254	-1.43016	0.105	0.526
2700097O09Rik	0.417119	1	-1.14068	-0.803629	-0.0179547	-0.266623	0.162559	-1.33408	-0.305	1.09	-0.358773	-0.0450973	0.0103611	0.177405	-0.0134489	0.186937	0.14286	-0.167399	0.125545	-0.187093	-0.0857534	-0.13486	-0.147959	-0.156667	-0.22	-0.0734807	-0.21	-0.400762	-0.622155	0.00654316	-0.418203	0.071	-0.137
2810004N23Rik	0.857523	1	-0.436659	-0.361574	0.0586977	-0.143707	0.437085	-1.08126	-1.56692	-0.646494	0.0470456	-0.0318086	0.212535	0.0131169	0.0724911	0.0663417	0.12604	-0.0130757	-0.0340616	-0.426279	-0.4503	-0.245431	-0.372073	-0.0866667	0.153333	0.326091	0.28	-0.277155	-0.793031	-0.226701	-0.420386	0.052	0.063
2810006K23Rik	0.153384	0.870968	-0.474285	-0.917538	2.04669	2.52725	-0.777608	-0.509792	0.315	-0.475	-0.213612	0.0713961	0.00232086	-0.114129	0.0836812	0.0922032	-0.0712313	-0.114984	0.141543	-0.222719	-0.358745	-0.132124	0.214499			0.110552	0.0666667			-0.00647664	-0.134673	-0.01	0.3185
2810021J22Rik	0.175089	0.870968	-0.28622	-0.759154	-0.423179	-0.242108	0.223945	-1.15939	-0.97	-0.185	-0.250747	-0.320844	-0.121329	-0.0562372	0.0937993	-0.25953	-0.0128077	0.0665523	0.152889	-0.0222884	-0.0508741	0.202114	0.00293736			-0.0848355	0.18			0.277429	0.261924	-0.38325	0.08975
2810403A07Rik	1.56025	1	-0.490023	0.547591	-0.297797	0.153076	0.697825	-1.28695	-0.894256	0.455584	0.0435222	0.0598954	0.129035	-0.147967	-0.12135	-0.262707	-0.0617859	0.22089	0.461353	0.0224529	-0.0962411	0.280303	-0.137444	-0.183333	0.243333	-0.0781105	0.206667	0.00660485	0.114859	-0.554415	-0.445965	-0.133	0.0445
2810408A11Rik	0.270034	0.870968	-0.465954	0.291073	-0.734088	-0.110173	0.671409	-1.2513	-0.1631	0.458613	0.00399883	-0.236897	0.00906457	-0.0641013	0.13416	-0.0546639	0.517462	0.165669	0.330288	0.272318	0.189289	0.00556185	0.0467578			-0.127186	0.54			-0.54606	-0.246843	-0.0845	0.051
2810416G20Rik	0.21495	0.774194		-0.43736	-2.34241	-0.878029	0.405251	-0.745756	0.288809	1.74984	-0.11231	0.0449372	-0.0510408	-0.129305	-0.0240777	0.0971065	-0.0924067	-0.128848	0.348892	0.146814	0.399691		0.0676114			-0.893704				-0.510161	-0.176907	0.399	1.3635
2810417H13Rik	1.79785	1	-0.844572	-0.443425	1.42369	0.263482	0.468081	-0.202928	-0.850788	0.181824	-0.884462	-0.926556	-0.506347	0.394284	2.86088	0.803267	0.833696	-0.813432	-2.13842	-0.682323	-0.47805	-1.0555	0.584213	0.0966667	0.126667	0.05461	-0.32	-0.838791	-0.924707	-0.586071	-0.828336	0.1085	0.2595
2810428I15Rik	1.65202	0.967742		-0.28424	-0.380074	-0.444897	-0.102194	-0.177055	0.03	-1.37	-0.311294	0.177441	-0.196564	-0.184971	0.00528962	-0.183271	0.0279268	-0.0751298	0.0205142	0.148572	0.170488	-0.243185	0.0625725	-0.0533333	-0.166667	-0.0692527	-0.296667	0.0809311	0.268814	-0.428237	0.174495	0.025	0.096
2810459M11Rik	0.107088	0.935484		-0.533707	-0.0603195	-0.369538	1.01338	0.0869183	0.9	-0.79	0.0744737	0.0128632		-0.0515811	-0.137984	-0.307049	-0.282172	0.12027	-0.0542954	0.021873	0.134037	-0.100914	-0.0275318	-0.36	0.00666667	0.0717097	0.01	0.114809	-0.0362856	0.0783401	-0.0704181	-0.192	-1.033
2810474O19Rik	1.08684	0.935484		-0.396995	0.275851	0.166025	0.220834	-0.389367	-1.6993	1.10218	0.424573	0.642184		0.136088	0.37779	0.0724682	0.111088	-0.0645957	-0.0151081	-0.0122614	-0.0188154	0.428213	-0.21514	0.1	-0.00666667	0.159099	0.283333	0.345291	0.626327	0.0953332	0.986611	0.0015	0.6725
2900011O08Rik	0.228391	1	0.141361	-0.227874	-0.254421	0.241609	0.893975	0.02978	0.82	0.01	-0.209673	-0.367379	-0.00122661	-0.0836238	-0.0671048	-0.0249214	-0.21263	-0.162727	0.0910132	0.0116742	0.076321	0.0758986	-0.0248637	-0.0166667	0.113333	0.0457274	0.1	0.173642	-0.110692	0.122066	0.213668	0.311	1.246
2900026A02Rik	0.914653	0.870968	-0.329859	-0.0773197	-0.0692653	-0.585933	-0.025628	-0.764144	-0.180016	-0.58	0.259632	-0.0132281	0.0739053	-0.115024	-0.440303	-0.129845	-0.846784	-0.183133	-0.210307	-0.00922074	-0.311558	0.0352016	0.688171			-0.0774552	-0.156667			0.0718446	0.339703	-0.065	-0.438
2900073C17Rik	0.171807	0.354839		-0.0940757	-0.261908	-2.90385	-1.56182	0.609622	0.19	-0.58																				0.110792	0.528139	-0.014	-0.191
2900092C05Rik	0.0306913	0.83871		1.91754	1.89155	-0.533432	3.60288	-0.137002	0.6	0.195	-0.143793	-0.025291	0.0100521	0.0184153	-0.340869	-0.0661906	0.122291	-0.236926	-0.162334	0.010333	-0.0569914	-0.0896221	0.0581822			-0.0365519	-0.133333			-0.19122	-0.283855	0.36	1.092
3010026O09Rik	0.470328	1	-0.430835	-0.649915	0.00673108	-1.37276	0.124758	-0.490283	0.0641895	-0.523508	-0.35435	-0.1946	-0.320378	-0.0230083	0.00840465	0.0353615	-0.0645798	-0.304153	-0.261993	-0.40351	-0.407254	0.304987	0.242686	0.17	0.48	-0.0893022	-0.356667	-0.539992	-0.917445	0.149067	0.00555668	-0.106	0.55
3010085J16Rik	0.0395534	0.451613									-0.0351899	0.120304		0.0561303	-0.071125	-0.118393	-0.129991	0.028774	0.0763433	-0.371455	-0.122442	-0.064118	0.00131797			-0.0692278	-0.163333
3021401N23Rik	0.0523407	0.354839		-1.2149	0.510831	-0.379192	-0.407601	-0.15309	0.55	0.14																				0.237256	0.834731	-0.126	-0.053
3110001I22Rik	0.28648	0.387097		-0.12009	-0.274799	0.158754	-0.0052612	-1.3772	-1.21	0.72			-0.00976519																	0.152695	-0.0580947	0.172	0.847
3110002H16Rik	1.05545	0.967742	-0.033165	-0.694532	0.0486695	0.132983	-0.0775699	0.350564	-0.186696	0.196779	0.334959	0.531827		-0.107545	-0.35602	-0.0310921	0.0584528	0.00691166	0.181327	0.44246	0.320732	0.0689177	-0.35074	-0.206667	0.0833333	0.435376	0.45	0.347786	0.476387	0.217319	0.00548332	-0.008	-0.206
3110009E18Rik	0.393746	1	-1.0658	-0.302717	-0.5171	-0.573547	0.10171	-1.23102	-0.92	-0.175	0.206161	0.101661	-0.0880142	-0.324093	-0.482368	-0.143376	-0.154292	0.0159663	-0.0918028	-0.106552	-0.208643	0.00151655	-0.041047	-0.293333	0.0466667	-0.183292	-0.00666667	-0.272379	-0.324811	-0.298056	0.178271	-0.021	-0.0886667
3110021N24Rik	0.100491	0.290323		0.139206	-0.181728	-0.758027	-0.516346	-0.0854833	-0.055	-0.3																				-0.257472	-0.0861802
3110035E14Rik	0.0634557	0.870968	0.419665	0.722821	0.243623	1.19114	1.18242	-0.050455	0.26	0.095	-0.20858	-0.00808006	-0.0389694	0.0931448	0.103887	-0.113616	-0.253467	-0.278579	-0.296381	-0.0800432	0.227093	0.0761977	-0.00835861			0.0421144	-0.0866667			-0.197773	-0.130644	2.27	1.32
3110039M20Rik	0.723841	0.322581		0.754244	0.449113	-1.67499	-0.061719	2.58314	-2.31	0.415																	0.16			1.2939	2.1844
3110040M04Rik	0.188199	0.806452		0.542898	1.16294	-2.1964	-0.174679	0.0331933	0.27	0.46	0.174461	-0.0145729		0.0805843	-0.296152	-0.0343245	0.0287082	-0.282335	-0.0532191	0.288851	0.323154	0.166787	-0.0238359			0.131982	0.39			0.194189	-0.204446	0.077	0.059
3110040N11Rik	0.618584	1	-0.793503	-1.33979	0.537795	-0.586235	0.644646	-1.43567	-0.96	-0.165	-0.153095	-0.054113	-0.132104	-0.0749844	0.0296072	0.118715	0.197565	0.0678021	0.0346401	-0.0790142	-0.0795195	0.0102637	0.329258	0.06	-0.08	-0.0218354	-0.0966667	-0.063652	0.287973	-0.359128	-0.567832	-0.081	-0.095
3110043O21Rik	0.612272	0.967742	-0.523532	-0.214149	0.6931	0.777536	0.274038	-0.119057	-1.475	0.64	0.615361	1.08709		-0.196896	-0.0480527	-0.00028727	0.32608	-0.26746	0.066636	0.492679	0.417501	-0.0114946	-1.50392	0.283333	-0.17	0.360065	0.25	0.417887	0.222525	0.304837	-0.0822484	0.025	-0.788
3110052M02Rik	0.282165	0.83871	-1.03477	-1.05101	-1.20821	-0.435986	0.426314	-0.0243217	-0.288582	0.162616	0.125351	0.378131		-0.283539	-0.297249	0.202419	0.160487	-0.484738	-0.181461	-0.0104283	-0.16136	0.251596	-0.112058			-0.188288	0.243333			-0.200327	0.0284235	0.272	0.9
3110057O12Rik	0.153654	0.870968	-0.441074	-0.465708	-0.105952	0.296344	0.387108	-0.221823	0.21649	0.102845	-0.411342	-0.320854	-0.221887	0.327059	0.623379	0.00391523	0.328332	-0.0484258	0.230404	-0.308472	-0.258514	0.276936	0.542751			0.134849	-0.406667			-0.102213	0.089451	0.1925	0.5
3110062M04Rik	0.317227	0.580645	-0.689161								-0.610631	-0.271548	-0.0611582	0.0079195	0.159734	0.122303	0.0804294	-0.435849	-0.203599	-0.0768664	-0.0465567	-0.107166	-0.0544362			0.062913	-0.0433333					0.058	0.00533333
3110079O15Rik	0.317544	0.935484		1.12591	1.0658	1.18442	-0.629252	-1.00693	1.155	-0.505	-0.0767324	0.0926877		0.156826	-0.255217	-0.165428	-0.252795	0.0697702	0.0291293	0.0287518	0.113715	0.0380811	-0.00124318	-0.0966667	0.05	0.0353699	0.02	0.0879884	0.00777806	-0.0788851	-0.168859	-0.229	-0.712
3110082I17Rik	1.011	0.870968	0.0119933	-0.200195	0.337457	-0.457905	0.355191	0.331758	-1.29	-0.7	0.0309332	0.0576502	0.602819	-0.0603063	0.149947	-0.0528856	0.181767	-0.00430281	-0.13806	-0.00949498	0.259385	-0.651513	-0.0915894			0.154721	0.143333			0.0321755	-0.725285	0.027	-0.12
3110082J24Rik	0.194525	0.451613									-0.0428652	-0.0465667		0.0229764	-0.251988	-0.102429	-0.330085	-0.0654576	-0.181156	0.133412	0.205133	0.00957106	0.00575808			0.120653	0.0366667
3300002I08Rik	0.137025	0.870968	0.218951	-0.381491	0.174088	-0.410246	0.058522	-0.207248	0.36	0.785	0.150886	-0.105711	0.0326134	0.0030723	0.225182	-0.180383	-0.0617586	0.0147989	-0.0770123	-0.123798	0.0690525	0.159119	0.0251781			0.00677592	0.0366667			-0.0326433	-0.362978	-0.064	0.691
3425401B19Rik	0.10286	0.451613									0.0934528	-0.241847		-0.0398034	-0.0729534	-0.180288	-0.111433	0.0163905	-0.0493344	0.150326	0.145019		-0.0374928			-0.0534304						0.241	0.093
3632451O06Rik	0.0470952	1	0.264833	-1.49304	-2.20163	-0.715023	-1.08746	1.32316	0.36	-0.63	-0.286886	-0.309706	0.100957	-0.136757	0.36203	0.506058	-0.102204	-0.178416	0.181504	0.180603	0.0735116	0.0704879	-0.0594515	0.27	-0.34	0.0645387	-0.0266667	0.112189	-0.0521229	-0.136968	0.156665	1.938	1.38
3830403N18Rik	0.0811208	0.870968	-0.277051	-1.42959	-1.52982	-3.8314	0.638326	-0.286212	0.085	0.205	-0.147507	0.434546	0.0567452	-0.632576	0.246594	0.517727	0.0901714	0.273566	0.873559	-0.00524032	0.285518	-0.00189103	0.4228			0.0265552	0.69			0.0436324	-0.0860894	-0.7	0.141
3830406C13Rik	0.514846	1	-0.414766	-0.491019	-0.305836	-0.832155	0.470476	-1.62031	-1.36812	0.734775	0.0491105	0.0587696	-0.0804844	-0.13051	-0.223176	0.0162613	-0.0920543	0.049749	0.239466	-0.186068	-0.210311	-0.0257544	0.148961	0.22	0.146667	-0.229723	-0.153333	-0.0745321	0.106446	0.840756	1.10451	-0.236333	-0.206
3830417A13Rik	0.0562894	0.870968	0.0562309	-1.06333	0.290551	-0.49041	0.160257	-1.48031	0.66	0.44	-0.0960137	-0.0593253	0.0174417	0.223667	0.0314843	0.134162	-0.145196	-0.00194553	0.0849272	0.0956321	-0.00584238	-0.00865201	0.0672304			0.0444637	0.116667			0.185438	0.0376015	-0.231	0.226
4430402I18Rik	0.0785037	0.870968	0.140344	-0.540568	1.96683	-1.22239	0.798366	-0.309295	0.39	-0.56	-0.570268	-0.0167421	0.152689	0.100403	-0.0397921	-0.0489802	-0.134272	-0.460434	0.0101682	-0.0854692	0.0841852	0.257094	-0.102714			-0.0683827	-0.326667			-0.0387642	-0.0607293	0.744	0.594
4632428N05Rik	0.366059	0.967742	0.58788	0.09501	0.858451	-1.39136	0.00512779	0.502392	0.650027	-0.4508	0.190057	-0.204249		-0.0281317	0.504654	0.453655	0.241985	0.183639	-0.258911	0.146333	-0.0409886	-0.0413273	0.0182065	-0.146667	-0.0133333	-0.461597	-1.08333	-0.0184903	-0.0384906	0.149778	1.09601	0.024	0.796
4732456N10Rik	0.227405	0.580645	0.345111								0.241175	-0.320105	-0.0755947	-0.0163255	0.0776862	-0.258539	-0.216936	-0.00349258	-0.147566	0.133571	0.23834	0.0388985	-0.163032			0.0351526	0.05					1.216	0.529
4833413E03Rik	0.128456	0.290323		-0.18513	-0.337242	-0.478429	-0.562036	-0.278675	0.775	-0.325																				0.137461	0.213971
4833420G17Rik	0.449894	1	-0.30302	-0.207859	-0.33968	0.166479	0.490859	-0.601961	-0.359138	-0.0194574	0.0949683	0.0232004	-0.0285717	0.156052	0.102742	-0.00487958	-0.0895896	0.011524	0.106201	0.0345916	-0.142207	0.223485	-0.0563206	0.14	-0.173333	-0.141999	0.14	0.187679	0.146653	0.200616	0.477619	0.191	0.9095
4833423E24Rik	0.989303	0.83871		0.196629	-0.464147	0.543315	0.972594	-0.142413	0.225	-0.335	0.0439944	-0.205704	-0.143035	-0.398924	-1.55665	-0.322974	-0.111156	-0.0652334	-0.24495	-0.118391	-0.128869	0.0761922	-0.253565			-0.0319441	-0.0133333			0.0269349	-0.117806	-0.971	0.027
4833427G06Rik	0.0529011	0.870968	-0.0755503	-0.928839	2.69268	0.98388	-0.187221	-0.0204483	0.1	-0.05	0.120333	-0.0224532	0.0277427	0.320844	-0.0724766	0.00648201	-0.0827206	0.109168	-0.0222825	0.0789188	0.0764206	0.0410414	-0.000878994			-0.190066	-0.496667			1.12994	1.89065	-2.226	-1.47
4833439L19Rik	2.55146	1	0.0728469	-0.359687	0.22294	-0.0556672	0.525387	-0.344725	1.05935	1.35661	0.253022	0.0886981	0.160275	-0.0997561	-0.3302	-0.150295	-0.155344	0.188999	0.214697	0.116119	0.127333	0.306595	-0.0387296	-0.1	-0.1	0.133374	0.21	0.0805875	0.310224	0.0560873	0.0260883	0.1005	0.205
4921501E09Rik	0.0717585	0.870968	0.307007	-1.21501	1.52655	-1.07138	0.395929	0.314178	0.28	6.40685e-16	-0.219262	-0.142815	-0.068612	0.16355	-0.234531	-0.0918521	0.0379161	-0.000676376	0.0638568	-0.0444503	0.130521	-0.0116865	0.00164373			-0.116629	-0.0866667			0.0123396	0.17287	0.093	0.286
4921504E06Rik	0.0441915	0.870968	-0.0183809	-1.0546	-0.625879	0.578936	0.270471	-0.092282	0.21728	-0.357331	-0.0491576	-0.0467747	0.0243513	-0.103003	-0.194721	0.0223766	-0.354562	-0.00394734	0.0455878	0.00824782	0.0494939	0.0550016	0.0451141			0.06812	-0.0366667			-0.0830756	0.0478523	0.138	-0.009
4921506M07Rik	0.0619241	0.83871		0.754888	1.27302	0.0848889	-2.15528	-0.0405767	0.8	-0.56	-0.0704039	0.0530437	-0.0261053	-0.0613976	-0.0823248	-0.151767	-0.105496	-0.0908555	0.0136191	0.0536475	-0.156421	0.474044	0.0273244			0.0840788	0.0766667			0.00156331	0.0598893	1.677	1.861
4921507P07Rik	0.12576	0.870968	-1.32474	-0.99629	-0.0272215	-0.440146	0.914531	-0.87538	1.3	0.32	-0.399073	-0.410545	-0.352517	0.0614278	-0.409521	-0.139242	-0.498285	-0.112859	0.0924104	-0.384535	-0.315544	0.0809831	-0.0549377			-0.696909	-0.45			-0.259881	-0.187236	-0.039	-0.748
4921509C19Rik	0.103361	0.580645	-1.10332								0.122288	0.0674135	0.17663	-0.230563	-0.424898	-0.205633	-0.190554	0.226012	-0.0452347	0.221349	-0.053898	-0.196376	0.055463			-0.0111495	-0.0133333					-0.546	1.018
4921511C20Rik	0.0352655	0.580645	0.0414926								-0.0195489	0.219343	-0.00216619	0.0956406	-0.0692236	0.0429825	0.350867	-0.0416744	-0.0122923	0.0436875	0.092789	0.0276109	0.0384899			-0.00694338	0.33					-0.133	-0.009
4921511H03Rik	0.0918849	0.870968	-0.227582	-2.79008	-2.99354	-0.521285	3.77761	0.296723	1.03	-0.325	-0.0790063	0.0739047	0.0248139	-0.128144	-0.262958	-0.0151669	-0.0648713	-0.199449	-0.117497	0.0830858	-0.0189543	-0.0439501	0.10856			-0.0562282	0.0266667			-0.346589	0.0596607	-0.114	-0.06
4921517D22Rik	0.0865692	0.870968	0.148843	-0.137942	3.12823	1.08901	-0.0214531	0.062705	0.76	-0.575	-0.0136649	-0.39713	-0.0830954	0.00888902	0.0293476	-0.149075	-0.36575	0.0808706	0.0720787	0.208997	0.310314	0.0218361	-0.0906466			-0.0615398	0.07			0.0090487	-0.18803	0.061	-0.288
4921522P10Rik	0.0531313	0.709677	0.243854	-0.0780025	0.14439	2	0.758992	0.120727	0.33	-0.3	-0.130308	0.12435		0.115976	-0.0672452	0.141934	-0.240124	0.00956231	0.0365571	0.11694	0.075396		-0.0251215			0.0666955				-0.308668	-0.188879
4921524J17Rik	0.803382	0.870968	-0.0496694	-0.587476	0.0418312	-0.220747	0.693759	-0.472522	-1.53	0.755	-0.0575	0.136094	0.145498	0.0472847	-0.0974863	-0.119445	-0.235676	-0.0820377	0.0661854	-0.0458284	-0.0799366	-0.0664191	-0.0587397			0.0459796	0.513333			0.373538	-0.299462	-0.133	-0.272
4921524L21Rik	0.0363243	0.83871	0.124097	-2.19265	0.961526	-0.387023	1.05889	0.113637	0.305	0.05	-0.294025	-0.25155		-0.169361	-0.00508564	0.0478872	-0.123982	-0.0724003	0.127562	-0.0467232	0.0958487	0.0364049	0.0586355			-0.0778465	0.166667			-0.0214303	-0.0698477	1.326	1.542
4921528I07Rik	0.0767924	0.741935		-0.428047	-0.100047	-1.10073	0.557358	0.16853	0.175	-0.095	-0.28857	-0.178479		-0.175496	-0.222665	-0.237652	-0.157076	-0.00867491	-0.0571626	0.0207745	-0.232742		-0.0392712			0.067393				-0.105867	-0.109551	0.129	0.101
4921530L21Rik	0.127278	1	0.167624	0.823122	0.652077	0.770518	1.18442	-0.0848783	0.195	-0.14	0.0425733	-0.177744	0.0464916	0.0455437	0.118281	-0.0977317	-0.0676892	0.0368894	0.0423525	0.173843	0.110753	-0.09443	0.0410336	-0.16	-0.186667	-0.0488003	0.0966667	0.0546064	0.0363898	-0.064908	0.298186	0.089	0.455
4921536K21Rik	0.112839	1	-0.772544	-1.88683	-0.0168738	0.577767	-0.0995357	0.1241	0.12	-0.135	-0.102681	-0.23229	-0.159671	0.405951	-0.14457	0.025113	-0.335712	0.0060344	-0.0362845	-0.122877	-0.00862078	-0.14409	-0.222122	-0.03	0.1	0.118302	-0.0966667	0.143739	0.0491631	0.0584047	-0.140617	0.062	-0.559
4921539E11Rik	0.0379296	0.806452		-0.706269	0.290342	-0.662965	3.38247	-0.127662	0.08	-0.07	-0.0633449	0.00834099		-0.123492	0.0217984	-0.00427133	-0.219116	-0.0332831	0.0347364	-0.0833257	0.0361929	0.0279338	0.089314			0.0668866	-0.04			0.0654851	0.131896	-0.578	0.6985
4921539H07Rik	0.0488911	0.354839		-0.592122	-0.482152	0.21864	1.66742	-0.000573333	0.415	-0.065																				-0.0689061	-0.185962	-0.054021	-0.309736
4922502D21Rik	0.0883371	1	0.127346	-1.83872	-2.86507	1.34792	2.85086	-0.117465	0.45	-0.1	-0.258489	-0.0968174	-0.0857567	-0.0986341	-0.0463045	0.0647649	-0.105277	-0.0593185	0.220559	0.111794	0.088757	-0.0560951	-0.0930549	0.0633333	-0.05	0.00948905	0.0666667	0.0787483	0.0934193	-0.107509	-0.0803353	1.122	-0.153
4930402F06Rik	0.0307109	0.806452		0.0369942	-2.41028	0.0458037	-1.75845	-0.145292	0.395	0	-0.083471	0.0548416		0.0947369	-0.171541	0.0607205	-0.196049	0.0890883	0.023573	-0.0174434	0.131059	0.0726155	0.065142			-0.0945923	-0.146667			-0.0537944	-0.00267029	1.469	0.853
4930402H24Rik	0.722255	0.83871		0.105217	-0.178249	-0.00164076	0.823656	0.453468	-0.303202	0.372323	0.461262	0.793483	-0.381693	-0.0346363	0.0516108	-0.181038	0.390488	0.107625	0.407082	1.01014	0.746432	0.789294	0.49328			0.222084	0.586667			0.4171	0.569154	-0.32975	-0.32875
4930402K13Rik	0.0497416	0.741935		0.49304	0	0.514573	3.29278	-0.13006	-0.035	-0.46	0.0452007	0.0199392		0.005276	-0.343001	-0.0359843	-0.118789	0.0859033	0.0677087	0.0906722	0.240484		-0.0105819			0.0828567				-0.130264	-0.217551	0.329	-0.29
4930404H24Rik		0.0645161																														-0.046	0.008
4930404N11Rik	0.219898	0.83871		-0.500266	-0.0212811	0.211616	0.209458	0.102334	0.764629	-0.267529	-0.0296848	-0.253979	-0.0918303	-0.0345436	-0.188008	-0.133514	-0.57403	-0.0326908	-0.105186	-0.0262372	0.282607	-0.0522129	0.0741456			-0.0686393	0.0966667			0.0234299	-0.066272	-0.175	0.016
4930407I10Rik	0.0942349	0.806452		0.976153	-2.48308	-1.95247	0.139725	0.232313	0.44	-0.205	-0.240123	-0.339296		0.0799098	0.0244072	-0.12979	-0.542656	-0.00957453	0.174883	0.116883	0.137611	0.000816815	-0.0138627			0.0199458	0.17			-0.029079	-0.0759699	0.059	-0.108
4930412O13Rik	0.143112	0.806452		-1.46632	-0.176878	0.862496	0.395929	-0.274492	0.295	0.06	0.124825	-0.130347		-0.00544851	-0.177957	-0.276765	0.181527	0.091373	-0.0569638	0.0249439	0.19023	0.309995	0.0609552			-0.523635	0.186667			0.093315	-0.0696524	0.067	0.003
4930415F15Rik	0.0673044	0.806452		-1.28688	0.573647	0.678072	0.632067	0.138437	0.43	-0.37	0.147777	-0.000457389		0.04369	0.0598011	-0.124246	-0.188882	0.0135718	-0.0436589	-0.0744402	-0.0344638	0.114161	0.0502614			0.0853061	0.02			0.101369	0.0370328	-0.333	-0.863
4930415L06Rik	0.17564	0.548387									-0.155584	-0.168743	-0.10331	-0.294287	-0.0685806	0.316948	-0.137656	-0.0323409	-0.0461809	-0.00988945	0.012712	-0.00901841	-0.0421517			-0.0412004	0.0333333					-0.514	-0.242
4930415O20Rik	0.0481024	0.83871	0.0475768	-0.712304	0.522298	-0.243604	0.975338	-2.03769	0.36	-0.075	-0.0428454	0.00919066		-0.151862	-0.141642	0.148718	-0.101189	-0.0727378	-0.077424	-0.027518	-0.0526937	0.0360831	-0.0380912			0.040011	0.0533333			0.0572572	-0.171248	0.02	-0.49
4930423O20Rik	0.0222398	0.677419		-1.09798	-1.13863	0.0282199	-1.13407	0.227787	0.0748576	-0.269853	-0.0371824	0.0890579		0.151801	-0.0593931	0.0452803	0.0898322	-0.0550469	-0.021658	-0.0781148	0.0345495		0.0407377			0.0134443				-0.0298281	-0.0477607
4930425F17Rik	0.0614009	0.677419		-0.899061	0.00250148	-0.17638	2.20658	0.124251	0.322675	0.0878366	0.0407734	-0.0676796		0.0872629	-0.123603	-0.0882963	0.0391672	-0.123574	-0.0933887	-0.0228995	0.0506623		0.0639911			0.099889				0.0991015	-0.00531888
4930427A07Rik	0.914858	1	-0.683441	-0.373185	-0.273585	-0.119019	0.964799	-1.72248	-1.1643	-1.49168	-0.779731	-0.502353	0.582247	0.0101331	0.123449	0.0146325	-0.174196	-0.362595	-0.319576	-0.0870333	0.00675374	-0.583077	0.452358	-0.00666667	0.11	-0.611419	-0.336667	-0.237942	-0.217246	-0.164631	-1.10137	-0.007	0.095
4930428B01Rik	0.232626	0.290323		-0.345937	-0.102004	-0.0379851	-0.0992771	0.120368	-1	-0.38																				-0.0498893	-0.653361
4930430A15Rik	0.0379903	1	0.0481682	-2.1375	-0.0943274	-1.08246	1.8625	-0.125062	0.56	0.44	0.0591351	-0.0783843	0.0941879	0.0619937	0.0266008	0.00165744	0.0321725	0.0198559	-0.00522845	-0.0284068	0.0591653	-0.102439	0.029728	-0.176667	-0.32	-0.0534953	0.0933333	-0.224034	-0.0864175	-0.0263536	-0.110143	0.261	0.0255
4930430F08Rik	1.10894	0.935484	-0.584283	-0.6608	0.104131	-0.426551	-0.237846	-0.631124	-0.572857	0.280014	-0.107882	-0.260033		-0.211722	-0.334114	-0.123007	-0.0182786	-0.0560036	0.0037768	-0.123251	-0.123131	-0.072578	0.158819	0.0866667	0.0266667	0.0366466		-0.196784	-0.121333	0.090997	0.13965	-0.365	-0.387
4930432K21Rik	0.132916	0.870968	0.415869	-0.726821	-0.26586	0.640004	-1.24793	-0.366303	0.275	-0.715	0.0267638	-0.265159	-0.0554021	-0.142185	-0.389059	-0.291032	-0.631307	0.0612639	-0.251923	-0.0303344	0.0842332	0.129818	0.243288			0.243802	0.0766667			-0.133491	-0.536163	0.121	0.259
4930432M17Rik	0.0666407	0.483871									6.31295e-05	0.163323	-0.038353	0.196426	-0.15411	-0.342577	0.260728	-0.0934692	-0.07995	-0.110142	0.0982145		-0.00527844			-0.0036547						-0.017	-0.111
4930433I11Rik	0.0529097	0.580645	0.0488106								-0.0405397	-0.0162736	0.00281576	-0.0387016	-0.203052	0.00136191	0.179134	-0.185859	-0.265215	0.210668	-0.0479661	-0.0251867	0.037363			0.0273558	0.11					0.095	-0.447
4930435E12Rik	0.0421638	0.806452		-0.306224	0.186769	-0.227177	0.959358	-0.051125	0.415	0.065	0.0976844	-0.0204346		-0.116181	0.0431835	-0.0742232	-0.101558	0.105658	-0.029342	0.0308222	0.212143	-0.231678	-0.115297			0.140569	-0.0766667			0.130275	-0.201758	0.189	0.101
4930438A08Rik	0.313824	0.774194		-0.586038	-0.724939	-0.287751	-0.0557426	-0.396462	0.79	-0.3	-0.0768267	-0.0247222		0.157659	-1.58052	0.20559	-0.991205	-0.104078	0.132628	0.309015	0.272425		-0.132784			0.739048	-0.02			0.104005	0.132989	-0.477	-0.177
4930444G20Rik	0.12452	0.806452		0.199628	-0.665707	-0.881078	-0.31999	0.259972	0.605	0.2	0.486895	0.339773		0.376765	-0.00347945	-0.178773	-0.0104146	0.101969	-0.218038	0.196042	-0.15884	0.00228092	-0.0265334			0.10225	0.116667			0.0205824	0.00989413	1.934	0.388
4930444P10Rik	0.021599	0.354839		-1.11548	0.628031	-0.129283	3.73909	0.0657733	0.315	-0.365																				-0.321872	-0.161787	0.032	0.027
4930447A16Rik	0.0774005	0.741935		0.340229	0.116324	0.797371	0.576451	0.440832	0.64	-0.415	0.0942323	0.027977		-0.0259514	-0.210779	-0.271494	-0.117764	2.7085e-06	-0.0187392	0.0179075	-0.362577		-0.0101074			-0.0708657				-0.029072	-0.332367	-0.938	0.898
4930447C04Rik	0.0261912	0.870968	-0.0904908	0.275529	0.258656	0.176419	2.0941	-0.119488	0.142319	-0.140028	-0.111378	0.00876405	-0.0706781	0.0911324	-0.063459	-0.0515694	0.203332	-0.0826501	0.0691528	0.0199393	0.088258	0.140991	-0.00981425			-0.0174229	0.02			-0.113699	0.068013	-0.143	-0.085
4930447F04Rik	0.021119	0.741935		1.87447	-0.415037	2.63227	0.378512	-0.074665	0.12	-0.44	0.0369762	-0.0992175		0.0475056	0.0828549	0.0982457	0.064363	0.0713286	-0.0298102	0.0635661	-0.0238558		-0.00731127			0.0264725				0.132809	0.0651743	1.349	2.246
4930449A18Rik	0.0548321	0.741935		-0.941583	1.69032	-0.462478	3.09085	0.049245	0.34	0.095	-0.0440528	0.00127119		-1.45056	-0.89902	-0.138148	0.0594351	-0.196674	0.194025	-0.062928	0.478214		-0.0835716			0.0128872				-0.00174975	-0.165952	-0.74	0.549
4930449I04Rik	0.241408	0.741935		0.2754	0.15462	-0.963121	0.945401	-0.336073	0.223303	-0.186604	0.0615729	-0.154046		0.0451099	-0.00447064	-0.134556	-0.608783	0.108718	-0.211382	0.0358847	0.0995826	-0.0308073	-0.0356344			0.0456928	0.166667			-0.192363	-0.0412102
4930449I24Rik	0.0576038	0.548387									-0.276535	-0.0497402	-0.0620211	0.477091	-0.000731846	0.201954	0.132336	-0.311758	-0.0870701	0.0998962	0.16626	0.0917696	0.0162335			-0.0247752	0.13					0.2995	0.1545
4930451E06Rik	0.0569773	0.290323		0.986145	-2.87644	1.02146	-0.527858	0.125036	0.594043	0.383507																				0.178774	-0.224457
4930451G09Rik	0.152462	0.677419		-0.461462	0.0163018	0.49778	0.0754408	-1.01816	-0.0473939	-0.0201989	-0.204093	-0.0273258		-0.0255472	-0.0852662	-0.175634	-0.120546	-0.0132339	-0.0401526	-0.0660106	0.0754517		-0.0581325			-0.0989633				-0.0248694	0.0105235
4930451I11Rik	0.372605	0.870968	0.633323	-0.584963	-0.454129	0.758992	0.793909	-0.173795	0.51	-0.325	-0.139496	-0.644914	0.0303509	0.158192	-0.0318759	-0.154936	-0.560876	0.0338524	-0.0256008	-0.0257831	0.128813	0.0277141	-0.0881728			0.1723	0.09			-0.0686078	-0.407246	-0.279	-0.662
4930452B06Rik	0.0639699	0.870968	0.26382	-0.504859	-0.20464	0.957754	0.549728	0.611467	0.260229	0.0655665	-0.0254775	-0.151058	0.0954687	0.126414	-0.202308	-0.0541045	-0.279881	-0.00731995	-0.02109	0.0194546	0.133897	-0.0133115	0.0103309			-0.549979	0.0333333			-0.177719	-0.217358	0.311	0.009
4930453N24Rik	0.829427	0.83871		-0.693197	0.150708	-0.267574	1.74175	-0.461157	-0.34515	1.22451	0.253495	0.194263	0.312913	-0.320109	-0.268797	0.204123	0.30539	-0.58637	-0.319811	-0.175817	-0.178212	-0.220917	-0.114038			0.237898	-0.02			0.0231409	-0.238596	0.044	0.217
4930455H04Rik	0.0203564	0.354839		3.10852	-0.0588937	-1.47805	-0.152003	-0.233488	0.285	-0.505																				-0.057193	-0.208988	0.882	0.01
4930466F19Rik	0.0940139	0.709677		-0.540568	1.60486	-1.41504	0.70044	0.0156817	0.375	0.34	-0.157619	-0.0697404		0.445118	0.807187	0.0171319	0.383875	-0.167192	-0.0216599	0.0043054	0.0576423		0.0816469			-0.0554454	-0.04			0.226151	-0.138939
4930467E23Rik	0.068598	0.419355									0.0448979	0.0619462		0.0880141	-0.519469	-0.0774478	0.82244	0.0841237	-0.0189518	0.016382	0.0286935	0.171615	0.0194646			0.22352
4930470F04Rik		0.0645161																														-0.347	-0.096
4930470P17Rik	0.123903	1	0.0594737	-0.0119975	-1.79105	-0.487187	-1.07754	0.105407	0.99	-0.62	0.223058	-0.120452	0.0297523	-0.0272761	-0.169902	-0.273547	-0.517389	0.431722	0.171761	0.0720077	0.112967	0.203358	-0.0415682	0.316667	0.52	-0.0638308	-0.00333333	0.0188837	-0.173141	-0.0901525	-0.0914328	0.036	-0.198
4930474N05Rik	0.073595	0.83871	0.0985538	-0.494073	0.501588	-0.0178333	-0.112894	0.257537	0.86	-0.16	0.253803	0.0526811		-0.0849406	-0.0631431	0.041238	-0.256532	0.162986	-0.111563	-0.0432565	-0.0102513	-0.171903	0.0343861			-0.0903987	-0.0366667			0.0687413	-0.00792766	-0.874	-1.51
4930480E11Rik	0.0322226	0.806452		0.0418202	-2.64386	0.169925	-2.1375	0.127663	0.23	0.34	0.0785336	-0.0375343		0.151609	-0.182786	-0.0848837	-0.0171767	0.148684	-0.00938849	-0.0814511	0.038517	0.0550658	-0.0487081			-0.0795164	0.143333			0.0433502	-0.121229	0.011	0.427
4930481A15Rik	0.0227396	0.354839		-0.199309	-1.21057	1.02385	0.485427	0.0875833	0.195	0.03																				0.167819	0.0660872	0.006	-0.286
4930486L24Rik	0.437121	0.870968	0.232788	0.662215	1.59615	1.0546	0.610173	-1.50207	-1.09	0.265	1.38349	1.60539	0.613129	-0.0251809	0.112037	-0.191036	-0.445345	-0.13804	-0.144799	1.18677	1.2665	-0.185401	-0.0103496			-0.203754	0.41			1.11686	2.32692	-0.841	-0.922
4930500A05Rik	0.0184034	0.354839		0.174029	0.0703893	-3.30986	0.341037	-0.0948217	0.065	0.065																				0.0254947	-0.0417799	-1.604	0.61
4930502E18Rik	0.0681253	0.83871		1.68182	-2.03684	3.28787	1.0902	0.247003	0.275	-0.03	0.350437	0.030919	0.10943	0.29132	0.0867138	-0.110753	-0.0725086	0.279008	0.720236	0.277921	0.0174433	0.110005	0.033712			0.013549	0.27			-0.0322466	-0.0956297	-0.561	-0.67
4930503B20Rik	0.0535782	0.870968	-0.328055	0.918035	-0.207979	-0.336936	0.242196	0.0379418	0.344286	-0.418513	0.0806427	-0.0920401	-0.0795306	0.0983598	0.0282836	-0.248918	-0.00439822	0.146568	-0.0120263	0.053289	0.0855901	-0.0718937	-0.00151277			0.0170271	0.0166667			0.0803358	0.0182413	-0.241	-0.495
4930503E14Rik	0.111365	0.806452		0.309047	-1.11211	0.462972	3.70044	0.134932	0.385	-0.005	0.274523	0.434291	0.0373377	-0.0234123	-0.290252	-0.0840589	0.305338	-0.0346107	-0.292912	-0.24889	-0.365398	0.0913789	-1.24463			0.0330789				0.122257	0.0135338	-0.358	-0.049
4930503L19Rik	0.483267	0.870968	-0.398037	-0.324513	-0.310961	0.263561	0.377762	-1.03046	-1.39621	1.26342	0.0185093	-0.0250024	-0.00468659	0.0931737	1.34337	-0.0850648	0.642634	0.23896	0.118006	0.049543	0.139852	-0.676646	-0.927911			-0.251143	0.716667			-0.121102	-0.642125	-0.003	0.244
4930504O13Rik	0.160857	0.870968	0.456176	-0.222392	0.297822	-0.0507374	0.679508	0.224797	0.795	-0.995	-0.0914327	-0.157481	0.017704	0.112471	0.00845576	-0.191802	-0.238243	0.123719	0.12337	0.103564	-0.0703851	-0.20165	0.0448764			0.0357979	0.0966667			-0.124373	-0.127677	0.253	0.36
4930505A04Rik	0.0423212	0.83871	0.116613	-2.23816	-0.212994	1.03747	-0.633872	0.0523733	0.275	0.16	-0.259921	-0.138556		0.200574	0.158095	-0.222521	-0.219664	-0.0961557	0.125118	-0.127556	0.238124	-0.0513468	0.0827928			0.00603732	-0.0333333			0.0978199	0.046131	-0.21	-0.107
4930512M02Rik		0.0645161																														0.25	-0.429
4930513O06Rik	0.0269629	0.741935		0.0193653	-0.0740006	0.321928	1.69004	-0.0407133	0.17	0.22	-0.120748	0.138362		0.0492192	-0.0654802	-0.124882	-0.143898	-0.0598213	0.0791377	0.0808168	-0.035363		0.039651			-0.012096				0.0982976	-0.0212895	-1.003	0.036
4930516K23Rik	0.0515524	0.290323		-0.793549	-0.282099	0.59309	0.394972	0.292178	0.27	0.395																				-0.0612712	-0.101918
4930517N10Rik	0.042888	0.741935		-0.400931	-0.952553	-2.21632	0.666576	0.309945	0.485	-0.35	-0.0041259	-0.0214933		-0.153408	-0.0297844	-0.145091	0.102153	-0.0234785	-0.0980723	0.0776186	-0.0291015	-0.014342	0.0397655			0.0609923	-0.00666667			0.0988154	0.0696485
4930519G04Rik	0.0721526	0.870968	-0.0335494	2.17926	0.696813	-0.852307	-0.372227	-0.248509	0.337242	-0.133287	0.0168511	-0.0177569	0.053613	0.121661	-0.202994	-0.0383053	-0.0909176	0.0138342	-0.0331716	0.0811033	0.0417772	0.08026	0.0502374			0.0573948	0.196667			0.0196894	-0.0414143	-0.112	-1.043
4930519P11Rik	0.0588556	0.354839		-1.603	-1.28204	-0.357744	2.10434	0.0231667	0.205	-0.375																				0.0236216	-0.124506	0.036	-0.003
4930522H14Rik	0.0440354	0.870968	-0.110035	-2.18161	-0.513739	-0.876011	1.47805	-0.101637	0.275	-0.23	-0.167784	0.12123	0.173488	0.0274644	-0.354267	-0.0986915	-0.231861	-0.120071	0.10985	-0.0829341	0.161602	-0.204822	-0.0284949			-0.0476754	0.0366667			-0.126435	0.0793397	2.561	1.945
4930522L14Rik	1.87854	0.516129									-0.247009	-0.0758323		-0.328179	-0.104584	0.20991	0.00447423	-0.705116	-0.317504	-0.270357	-0.127654	-0.0111951	0.0735646			-0.368373	-0.0633333					0.321	-0.011
4930523C07Rik	0.678316	0.806452		0.947159	0.150274	0.187443	0.0764714	0.247439	-0.404413	-0.0475232	0.0347525	-0.0733626		0.393656	0.126454	0.0247555	-0.208011	-0.0393986	-0.0212501	-0.552634	-0.619096	0.33709	-0.113913			-1.4806	-1.09667			-0.119045	0.0453549	0.172	0.253
4930524B15Rik	0.0696694	1	0.872661	-0.509014	1.56768	0.0501858	2.50462	0.222907	0.035	-0.21	0.109969	0.136146	0.0638187	-0.0172632	-0.228876	-0.0303584	-0.395839	0.0752492	-0.204795	0.115047	-0.0389292	0.0385496	-0.0423204	0.00333333	0.18	-0.0940335	0.12	0.221066	0.0461273	-0.00668573	0.115262	1.495	0.816
4930524J08Rik	0.245316	0.677419		-0.434403	-1.32466	-0.558783	0.479993	-0.108565	-0.02	-0.44	-0.13072	-0.21731		0.0990857	0.141948	-0.232055	0.0347817	0.0794525	-0.130299	-0.15796	-0.0333338		-0.0165887			0.0818004				0.0113757	-0.442481
4930524N10Rik	0.0271227	0.677419		-0.0874628	0.106915	-0.584963	0.63743	-0.588183	0.04	-0.055	-0.126117	0.16998		-0.0586522	-0.644856	0.000997618	-0.0940596	0.268472	0.0349031	0.272086	-0.0816885		0.241442			0.0447836				0.0924518	-0.163475
4930534H18Rik	0.021949	0.354839		0.247928	-1.29956	1.71823	-2.47805	0.0443317	0.195	-0.07																				0.0491335	-0.220139	-0.018	-0.836
4930535I16Rik	0.0712794	0.354839		-0.17404	-1.3056	-0.2838	-0.850427	0.162603	0.321665	0.167136																				0.0665476	0.249312	-0.62	-0.461
4930538K18Rik	0.0864825	0.870968	0.0531596	-0.0289514	-2.89308	-0.88789	0.38807	0.264695	0.58	-0.08	0.171254	0.289779	-0.0466656	0.147046	0.310888	0.422267	0.418612	0.040998	-0.0913662	-0.0416473	0.244862	0.21606	0.041343			0.0987652	0.133333			-0.0477836	0.215244	0.106	0.728
4930539E08Rik	0.150296	0.870968	0.365461	0.955606	2.46447	-0.38448	1.5396	-0.399017	0.66	0.075	0.190478	-0.155962	-0.93475	0.0332189	0.0132165	-0.237267	-0.286252	0.193585	0.0358397	0.0569959	0.162589	-0.0575693	0.125495			-0.00677794	0.0433333			-0.201005	-0.18108	0.195	0.323
4930544D05Rik		0.0645161																														-0.039	0.313
4930544G11Rik	0.0765154	1	0.0786304	0.721284	-1.22913	-1.53343	2.96347	0.120248	0.51	-0.505	-0.162707	-0.0575819	0.0433183	0.0985172	-0.085044	0.27179	-0.515649	-0.330761	-0.0730441	0.0781339	0.113074	-0.0064182	-0.0413368	0.0333333	0.213333	0.171066	0.0466667	0.341639	0.233354	-0.0176396	-0.17139	-0.438	-0.404
4930548F15Rik	0.122116	0.354839		-0.453071	0.392434	1.15781	0.473109	0.154425	0.858303	-0.0879288																				0.12561	-0.00907009	-0.013	-0.05
4930548H24Rik	0.0754262	0.870968	0.164799	-1.09795	-0.330605	-1.02	0.0987492	0.231577	0.61	0.695	0.00140188	-0.291365	0.0193672	0.108833	-0.131326	-0.0874202	-0.157947	0.0706365	-0.0773102	-0.0549445	-0.186679	-0.0471534	0.0250335			0.00173863	0.0166667			-0.0788617	-0.47594	-0.059	-0.875
4930549C01Rik	0.141579	1	0.831019	0.409028	-0.532925	-0.477434	0.257798	0.124237	0.145	-0.14	0.101648	-0.456389	0.00625325	0.15385	-0.217405	-0.248239	-0.478151	0.249369	0.0638229	0.0111078	0.0351361	0.112961	-0.0307281	0.276667	-0.143333	0.0624549	0.106667	-0.04937	-0.172162	0.0225868	-0.161484	-1.665	-1.467
4930550C14Rik	0.0754749	0.870968	0	0.584963	-0.415037	-1.22239	0.192645	-0.224713	0.2	0.04	-0.015096	0.0430486	0.0116271	0.735451	-0.101635	1.22281	0.252405	-0.0417686	0.116888	-0.207641	-0.146955	-0.023172	-0.044286			0.0750947	-0.0166667			0.055747	-0.0473666	0.016	0.655
4930550L24Rik	0.0647214	0.967742		0.14671	0.0706191	-0.132836	0.31895	-0.175277	-0.03	-0.2	-0.041454	-0.0131327	-0.00200351	0.199025	-0.0292566	-0.157852	-0.0290868	0.00278547	-0.044324	0.000823866	0.338113	0.0342206	0.013863	0.05	-0.343333	-0.0313821	0.0466667	0.178909	-0.0772294	0.221193	0.206737	-0.914	-1.34
4930553M12Rik	0.101019	0.677419		-1.04541	-0.674854	-0.0641382	2.81348	-0.0136282	0.251084	-0.645497	-0.287377	-0.310828		-0.0176894	-0.0872565	-0.191036	-0.213461	-0.170052	0.0119162	0.120898	0.248737		0.125036			-0.11729				-0.0748696	-0.111326
4930555F03Rik	0.0894761	0.290323		-0.839227	0.483424	-0.629509	0.561165	-0.366765	0.665	-0.515																				-0.0439081	-0.167617
4930555G01Rik	0.0659288	0.548387									-0.212134	-0.0320993	-0.110704	0.0357874	0.693614	-0.160282	0.939122	-0.183667	0.147642	0.188593	0.379496	-0.045254	0			0.0579243	0.276667					-0.0695	0.6245
4930556J24Rik	0.0280947	0.354839		-0.263034	2.04731	0.713696	2.32193	-0.160982	0.465	-0.39																				0.0158112	0.196774	-0.187	0.222
4930557A04Rik	0.047849	0.741935		2.35693	0	-2.39232	-1.30117	0.121803	0.29	-0.125	0.0220245	-0.463885		-0.289457	-0.186472	-0.377655	-0.167603	-0.0899274	0.065674	-0.0540416	0.0448462		0.0172914			0.152095				0.0106204	-0.214431	0.305	0.272
4930558K02Rik	0.105332	0.387097		-0.906891	0	-1.2809	-0.551726	-0.289957	0.775	0.09																	-0.0633333			0.023716	-0.0478337	-0.205	-0.088
4930562C15Rik	0.0754643	0.806452		-0.970069	0.506765	1.97388	2.36382	0.0265771	0.794301	0.124044	0.137917	-0.229952		0.13864	0.0125237	-0.205435	-0.238616	0.186978	0.0653851	0.0873953	0.00521931	-0.0261431	-0.0426511			-0.0631904	0.263333			0.0662392	0.0774072	0.7235	0.2815
4930562F07Rik	0.105334	0.741935		-0.00178883	0.358497	-0.932096	0.494197	-0.112932	0.365	-0.205	-0.114337	-0.128508		-0.0240159	0.0805296	0.0728914	-0.278188	0.0449672	-0.0484773	-0.0726441	-0.374776		-0.178269			-0.264432				0.0964022	-0.0279341	0.64	1.023
4930563D23Rik	0.0822526	0.870968	-0.219008	1.34577	0.184425	-0.886343	-1.40828	-0.373805	0.825	0.24	-0.147335	-0.122985	-0.00283465	-0.0748058	-0.0345051	-0.11137	-0.35839	0.0731688	-0.0241209	-0.11151	-0.0321023	-0.101124	0.0342734			-0.0750019	0.113333			0.0521493	-0.14126	0.2755	0.519
4930563M21Rik	0.0366431	0.580645	-0.0502851								0.0152928	0.00151648	-0.0199587	0.0626976	-0.0351069	0.0133889	0.195948	-0.101551	0.0527685	0.17782	0.21683	0.0619223	-0.0203714			-0.0570912	-0.1					0.103	-0.167
4930564C03Rik	0.0905297	0.741935		-0.0727563	1.09085	0.575312	-2	-0.383482	0.01	-0.375	0.207278	0.0947626		0.347468	0.0253823	-0.207905	-0.377243	0.0216223	-0.0791484	0.327424	-0.0939823		-0.143065			-0.125344				-0.0823593	-0.0329473	-0.253	-1.278
4930564D02Rik	0.0720586	0.741935		-0.0614005	0.494765	-0.395929	0.691878	-0.0417917	0.375	-0.505	0.0791074	-0.0153462		0.195919	0.052472	0.172498	0.00649352	0.2351	0.246888	0.00432533	0.153786		-0.0485777			0.165167				-0.10278	-0.142948	0.026	0.201
4930567H17Rik	0.030691	0.516129									-0.0374072	0.03674		-0.18477	-0.0656879	-0.242667	-0.178607	-0.0248744	0.090814	0.110032	0.143823	0.0609274	0.0118754			0.0729256	0.0266667					-0.215	0.28
4930568B11Rik		0.0645161																														0.4	-0.074
4930568D16Rik	0.0351237	0.741935		-0.431716	0.0361597	-1.31366	1.58496	-0.216202	1.09	0.31	0.0294874	0.168688		-0.181283	0.0716754	-0.0220034	-0.175118	0.073771	0.0669141	0.0955014	0.0634876		0.0434128			-0.00850277				0.102203	-0.153687	-0.27	-0.006
4930571K23Rik	0.0991969	0.806452		0.569973	0.0536601	-0.919476	-0.321428	-0.203008	0.095	-0.605	-0.191984	-0.202957		0.352811	-0.265068	-0.301167	-0.291693	-0.00572976	0.0460197	-0.0409037	0.0196299	-0.0266421	0.0462816			0.0815841	0.01			-0.106159	0.00898361	-0.274	0.699
4930578C19Rik	0.053294	0.870968	0.255542	-0.941106	-0.741364	2.16993	2.2303	-0.0841417	0.43	-0.16	0.110148	-0.0960704	-0.00466	0.00655672	-0.132368	-0.121902	-0.0400454	0.0655211	0.118574	0.064328	0.0257402	-0.0992478	0.00242723			0.108923	-0.04			-0.187416	-0.139617	0.782	0.455
4930578G10Rik	0.0361483	0.709677		-1.70722	1.37346	-1.86477	-0.408963	0.040665	0.365	-0.695	-0.0804959	0.119707		0.190429	-0.0767524	0.10023	-0.0724693	0.119781	-0.0996888	0.035814	0.00637764		0.068059			-0.0148251	-0.0333333			-0.0121989	0.0974586
4930578I06Rik	0.0757345	0.870968	0.900772	1.3265	1.96557	0.347923	-1.45943	0.525825	0.23	-0.15	0.0901688	-0.132014	-0.00840329	0.183786	-0.0734039	0.105406	-0.381745	0.0516596	0.0497824	0.0469262	0.197113	-0.0646841	-0.107365			0.0433125	-0.183333			0.208323	0.0961612	-0.293	-0.071
4930579F01Rik	0.0587723	0.806452		-0.893085	1.70044	-0.308122	1	-0.0670683	0.485	-0.05	0.0911831	-0.0341585		0.262731	-0.158717	-0.154728	-0.102133	-0.226573	-0.182868	0.118742	-0.0144226	-0.110123	0.0161932			0.127863	0.123333			0.00642443	-0.100051	0.085	-0.594
4930579G24Rik	0.991412	0.806452		-1.10394	-0.194224	-0.372393	0.473531	-0.744258	-2.275	0.49	-0.312228	-0.258204		0.253285	0.599415	0.0584186	-0.244714	0.249363	-0.202542	-0.356139	-0.210277	-0.430973	0.436094			0.0258506	-0.123333			0.150324	-1.55647	-0.1705	0.3875
4930583I09Rik	0.0774867	0.741935		-0.0230836	-0.191141	-0.0713388	0.407302	-0.773465	0.61	0.215	-0.0483804	-0.0783925		0.123401	-0.0549271	-0.00555461	-0.156502	0.138933	0.0843084	0.0263942	-0.00583168		0.140461			0.0134444				0.0887396	-0.0356441	0.772	-0.026
4930590J08Rik	0.124146	0.580645	0.350225								-0.027584	-0.157724	-0.0569895	-0.103783	-0.0209292	-0.199949	-0.185779	-0.00626829	0.163394	0.00794264	0.204798	-0.0139484	-0.0202521			-0.00564831	0.0166667					0.269	-0.361
4930595D18Rik	0.0713254	0.354839		-0.259387	-1.41619	-0.0396271	-0.296049	-0.121607	-0.15	0.125																				0.0143726	0.0176738	-0.553	-1.551
4930595M18Rik	0.0369248	0.580645	0.483232								-0.0890231	0.0794631	0.0973908	-0.108652	0.0531995	0.137549	-0.0400096	-0.0797	-0.0575635	-0.0254495	0.0149173	0.036182	-0.108735			-0.0540143	0.0133333					0.968	-0.356
4930596D02Rik	0.0806099	0.548387									0.19284	-0.297996	-0.10783	0.10913	0.270544	-0.396444	-0.167393	0.291575	-0.244379	0.160857	0.223402	0.0775301	-0.0739163			0.0801367	0.01					0.083	-0.206
4930597O21Rik		0.0645161																														0.024	0.232
4931400O07Rik	0.025253	0.741935		2.40682	0.560715	1.558	2.64386	-0.049605	-0.065	-0.085	-0.0140989	-0.0570698		0.0168822	-0.0224259	-0.17418	-0.302351	-0.0449636	-0.0677193	0.211948	0.00674729		0.025542			-0.0310292				-0.077847	0.172111	0.399	0.4
4931406B18Rik	0.0828918	0.870968	0.51294	-0.807355	-0.109624	1	-0.760812	-0.0484083	0.585	-0.445	0.0801834	-0.245743	-0.0406725	-0.0301448	-0.207166	0.00101702	0.00945283	0.19714	-0.0179405	0.018914	0.139315	-0.101458	-0.0445132			0.159276	-0.03			0.134967	-0.272907	-1.057	-1.113
4931406C07Rik	1.22649	1	-0.727573	-0.382711	-0.55803	-0.655407	0.36104	-3.64999	-2.30375	0.81567	0.18508	0.213923	-0.477459	0.0449194	0.0971668	0.371602	0.103	0.158624	0.202665	-0.210431	-0.220179	0.494079	0.180694	-1.28137e-15	0.07	0.452259	0.0366667	-0.237979	0.0786977	-0.585396	-0.0667732	-0.168	0.826
4931406P16Rik	1.18007	0.870968	0.768299	0.0614411	0.0645405	-0.0199988	0.734121	-1.26232	-1.7373	0.166254	1.02026	0.924923	0.580644	0.0307936	0.0831587	0.0304489	-0.0589155	0.318285	0.141102	0.527035	0.341584	0.313927	0.0237157			-0.122693	0.256667			0.675406	0.407123	0.255667	-0.254333
4931408C20Rik	0.0482001	0.548387									0.213139	-0.107672	-0.00801703	0.0406648	-0.00463735	-0.15152	0.0398384	-0.00569959	-0.225197	-0.0368829	0.130366	-0.0195895	0.0799213			-0.0826808	0.0866667					0.093	0.717
4931409K22Rik	0.0816799	0.580645	0.345515								0.0589714	-0.0206571	0.0730003	-0.0427678	0.0929644	0.137891	-0.0741385	-0.0907268	0.0205799	-0.0895645	-0.0232317	-0.126654	-0.0560287			-0.00719368	-0.0366667					0.545	0.477
4931414P19Rik	0.186552	0.870968	-0.624068	-0.157778	-0.123439	-0.373433	0.310652	-0.595507	0.175	-0.455	0.350448	0.318663	-0.0561973	0.0300429	0.17362	0.0709003	-0.0458424	-0.187404	-0.0327639	0.0551752	-0.0301125	0.0929446	0.414522			-0.0449157	0.06			-0.121067	0.248504	0.955	1.45
4931417E11Rik	0.152529	1	0.993708	0.4825	-1.58005	-1.19868	-0.00547513	0.293615	0.8	-0.465	0.0870842	0.107532	0.163538	0.0272392	-0.378495	-0.234657	-0.0937646	0.12378	-0.130536	0.0734549	0.261397	-0.139335	0.0200302	0.18	-0.0766667	0.0788397	-0.0766667	0.00371505	-0.0597224	0.264128	-0.0990157	-0.002	0.561
4931422A03Rik	0.0758209	0.0967742	-0.26902																													-0.029	0.172
4931423N10Rik	0.0215108	0.806452		0.584963	1.65896	-0.263034	0.652077	-0.291782	0.265	0.105	-0.0153743	0.0737436		-0.0954838	0.0856757	0.181276	0.0156398	0.0549798	-0.0139614	0.218712	-0.0356157	-0.0098379	0.121199			0.0639682	-0.09			-0.126022	0.0543	0.006	0.8205
4931428F04Rik	0.193493	0.806452	0.0964863	-0.0341072	0.0653361	-0.844496	1.6538	0.180141	0.0317664	0.104192	0.080584	-0.139661		-0.0746344	0.218656	0.0947996	-0.182213	-0.29919	-0.135398	0.298417	0.30726	0.0620232	0.309965			0.505511				0.11252	-0.0109924	-0.164	-0.07
4931428L18Rik	0.0726092	0.419355	0.60898	0.0927231	0.627092	-0.0225749	0.746511	0.128425	0.556099	0.249568			0.110493																	-0.0101653	-0.0882893	-0.256	0.317
4931429I11Rik	0.0685795	0.806452		2.43812	2.47644	2.2123	3.15295	0.379272	0.395	0.075	0.0637981	-0.131024		0.121111	-0.0357468	-0.0566611	-0.152197	-0.0183616	-0.00629352	0.020635	0.225556	0.00806682	0.08009			-0.050251	0.0633333			-0.0351799	-0.0851778	0.439	-0.046
4931429L15Rik	0.141814	0.83871	0.257642	-0.905773	-0.161134	-0.473721	0.735613	0.069935	0.96	0.075	0.226982	-0.0484493		0.238292	-0.1566	-0.0936904	-0.324249	0.00467655	-0.107453	-0.0738415	0.0672092	-0.0138947	-0.0584715			-0.0132793	0.246667			-0.0467775	-0.130513	1.683	1.693
4931431F19Rik	0.0606237	0.741935		0.0473057	1.10692	-0.748461	2.63227	-0.414253	0.275	0.04	-0.0255668	0.0502215		0.13134	-0.167872	-0.0566296	-0.00473288	0.157609	0.0684451	0.0628092	0.0900355		-0.0365714			0.0625564				-0.0201268	0.00434947	0.226	-0.172
4931440F15Rik	0.0942433	0.548387									-0.00478711	-0.277088	0.0125781	0.370329	-0.201568	-0.0846995	-0.278628	-0.0668768	0.018044	-0.0425287	-0.0512329	-0.0726507	0.0109411			0.0637461	-0.0466667					-0.563	0.395
4931440P22Rik	0.28543	0.516129									-0.118265	0.133079		0.142971	-0.155798	-0.0394525	-0.39265	0.00580265	0.256348	0.145766	0.144847	0.121275	-0.0453432			0.0839971	-0.186667					-0.064	-0.0945
4932411E22Rik	0.101917	0.580645	0.193992								-0.0333935	0.0808117	0.0525142	-0.0236912	-0.377154	-0.0255124	-0.199958	-0.234248	-0.0864268	0.145435	0.0116115	-0.04878	-0.0495857			-0.0522322	0.143333					-0.179	-0.096
4932411N23Rik	0.0375226	0.548387									0.131473	0.0476641	-0.0813504	-0.0483478	-0.151163	-0.192677	-0.095145	0.0134847	0.0590741	0.0851776	-0.0293958	-0.0436864	-0.0579236			-0.0337477	-0.133333					0.2655	1.1925
4932414N04Rik	0.0355291	0.870968	0.225041	1.13191	-0.798366	-1	-1.23133	-0.161445	0.14	0.335	0.111833	-0.0936504	-0.0617016	0.0163136	-0.110979	-0.0816849	0.0461806	0.237989	-0.00239957	-0.122831	0.173187	0.074966	0.0198991			-0.10732	0.116667			0.0532061	0.333361	0.268	0.569
4932418E24Rik	0.129599	0.870968	0.244004	-2.36217	0.466423	-0.607683	1.86911	0.164533	1.25	0.365	0.0968072	-0.201624	0.101725	0.246022	0.294274	-0.143204	-0.370803	0.160344	0.0348273	0.14479	0.0765529	0.273046	-0.0112005			-0.0649272	0.0966667			-0.00969362	-0.15782	0.31	0.52
4932429P05Rik		0.0645161																														0.985	0.639
4932431P20Rik	0.144346	0.741935		-0.222997	0.280693	-0.255022	1.14833	0.041368	-0.209041	-0.250198	0.155655	-0.221163		-0.0438964	-0.06006	-0.0718602	-0.0398186	0.0242093	-0.0756641	-0.0966198	-0.0412462		-0.083059			0.197914				-0.0179276	-0.2649	0.238	0.338
4932438A13Rik	0.710652	0.967742	-0.416281	-0.917044	1.7995	-0.52022	-0.0821505	-0.535659	0.00819098	0.212411	-0.123676	0.153285		0.315301	0.290507	0.0172808	0.203462	-0.130973	0.0582203	0.260571	0.0185458	0.287271	0.169256	0.0633333	0.33	-0.217755	0.07	0.0769254	0.308086	-0.0551379	0.332886	-0.01425	0.1615
4932438H23Rik	0.0988478	1	0.361322	-0.428943	-0.559743	-0.535826	-0.484079	0.14069	0.99	-0.59	-0.0739554	-0.0541859	0.100176	-0.0558655	0.120857	-0.17544	0.0155177	0.0591559	-0.109716	-0.0357749	0.0860493	-0.121247	-0.0260821	-0.123333	-0.363333	0.0418287	0.23	0.0777997	0.0884898	0.0188479	-0.166826	1.679	0.691
4932442E05Rik	0.0189561	0.290323		-0.31034	1.36923	0.0721498	-0.0524674	0.246838	0.305	-0.435																				-0.151634	0.0168997
4932443I19Rik		0.0645161																														0.473	1.532
4933400A11Rik	0.0513727	1	-0.848207	-1.19265	0	0.321928	-2.9386	-0.144363	0.2	-0.28	-0.125424	0.10333	0.0339495	-0.0422532	-0.0540917	-0.134967	0.0519041	-0.154542	-0.056644	0.188581	0.00779178	-0.0855189	0.0869541	0.12	-0.08	-0.0291075	0.0133333	-0.0567469	-0.0707636	0.0557415	-0.183332	-1.266	-1.338
4933402D24Rik	0.0685077	0.741935		-0.0476967	1.18688	-2.49719	0.905363	-0.169493	0.515	-0.465	0.143649	0.0796302		0.127076	-0.0078591	-0.0961499	-0.0848878	0.0494154	-0.13463	0.191187	2.07441e-05		-0.0358597			-0.0239152				-0.292955	-0.221911	0.007	0.497
4933402E13Rik	0.0367597	0.806452		-2.56986	3.49185	3.14296	-0.400538	-0.3032	0.11	-0.1	0.0939306	-0.00234164		0.170075	-0.262438	0.00167677	-0.0590891	0.111893	0.16355	-0.0757408	-0.00300108	-0.0851874	0.0858474			-0.0894901	0.03			0.0266742	-0.141292	0.459	0.466
4933402J07Rik	0.0550222	0.870968	0.171243	-0.0614005	-0.106915	-0.137504	0.387023	-0.191322	0.565	0.245	0.0332198	0.107169	-0.0529758	0.152719	0.0177678	-0.18792	-0.246541	0.0438708	0.096326	-0.0880502	-0.0176029	0.0368137	0.0754219			-0.00467921	0.1			0.0321708	-0.10552	0.3815	0.2795
4933402N03Rik	0.0809322	0.83871		-1.72455	0.768517	-1.30117	0.616491	-0.11829	-0.185	0.31	-0.118548	-0.14254	0.0392788	0.0246099	-0.026701	-0.419437	-0.282848	-0.00928513	0.0992935	-0.0174508	-0.0621129	-0.273653	-0.0195698			-0.0505352	0.04			-0.176131	-0.275529	0.3185	-0.109
4933402N22Rik	0.0561293	0.483871									0.117298	-0.176192		0.015011	-0.0350987	-0.124778	0.141856	-0.0202108	-0.0145321	0.157243	0.0880744	0.0629394	-0.019853			0.523221						0.387667	0.529667
4933402P03Rik	0.131018	0.580645	0.622253								0.00838475	-0.343575	0.10762	0.107369	-0.263665	-0.244571	-0.518787	0.00125494	-0.244127	0.147542	0.220826	0.103926	-0.126525			0.0786436	0.03					0.047	-0.165
4933403O08Rik	0.0163828	0.354839		-0.540568	-0.616671	-0.563901	1	-0.109133	-0.21	0.11																				-0.0530111	-0.14971	1.467	1.134
4933405L10Rik	0.130465	0.806452		-1.03562	0.0845335	0.743225	0.0605415	0.172075	0.505	-0.085	0.142559	-0.153681		0.0757165	-0.149791	-0.00217849	-0.181371	0.110715	-0.193701	0.144775	0.0921219	-0.0911662	0.00906575			-0.0492999	-0.0333333			0.193156	0.135451	-0.001	-0.043
4933405O20Rik	0.0765164	0.83871		-0.0297473	-0.376148	-0.148099	0.621488	0.297385	0.865	-0.09	-0.0430183	-0.127005	-0.0909848	0.0710448	-0.0204336	0.155624	0.125755	0.230089	0.197606	-0.213023	-0.000798686	-0.191952	-0.0120911			0.0035578	0.103333			-0.0142772	0.217973	-0.249	-2.183
4933406J08Rik	0.0681355	0.806452		-0.423337	0.469958	0.611521	0.668549	0.0995867	0.38	0.015	0.0644632	-0.0236507		-0.0779989	0.0272873	-0.0198575	-0.0434611	0.0159108	-0.0125779	0.0794678	0.0134514	0.0164825	0.0261468			-0.0567791	-0.0766667			0.348781	0.229836	-0.164	0.275
4933406M09Rik	0.0591959	0.580645	-0.16856								0.007632	-0.132192	-0.000689769	0.0434987	-0.28162	-0.319956	-0.153066	0.176007	0.0189581	0.05766	0.157471	-0.163844	-0.0774959			-0.0308785	0.113333					-0.489	0.528
4933407L21Rik	0.0874208	0.741935		-2.61108	0.33985	-1.81943	1.1565	0.0189683	0.915	0.015	-0.0640249	-0.0975447		0.0618662	-0.221119	-0.202543	-0.0489669	0.04687	0.00188092	0.0957992	0.321423		-0.0062872			0.0221544				0.0312684	-0.0941751	-0.686	-0.472
4933408B17Rik	0.0364428	0.516129									-0.202347	0.172314		-0.14191	0.232309	-0.0444509	0.215867	-0.16499	0.117715	-0.129527	-0.251401	-0.104518	-0.0089956			0.0722641	0.02					-0.652	-0.012
4933409G03Rik	0.0460972	0.580645	0.358912								0.200359	0.00759465	0.0022046	0.0942791	-0.219166	0.0370807	-0.538229	0.110553	-0.0482383	-0.00923738	0.0475639	0.0244309	-0.0040259			0.0188699	0.0333333					0.771	-0.008
4933411G06Rik	0.0477651	0.83871		-0.711226	0.00660273	-0.233957	0.846843	0.210467	0.75	0.155	0.138948	0.0220475	0.152642	-0.16547	-0.175982	-0.0691632	-0.124853	0.151755	-0.0448878	0.128845	0.0569181		-0.0305752			-0.0667364		-0.0969019	-0.16316	-0.220985	-0.232081	0.2295	-0.549
4933411K16Rik	0.190357	0.83871	0.31601	-0.611435	0.257158	-0.377885	0.0931094	-0.255628	0.24	0.395	1.18276	1.41901		0.253823	-0.02038	0.0792447	-0.27494	-0.216845	-0.263859	0.505542	0.389031	0.00818202	-0.00570936			0.192723	0.4			0.158827	0.0861158	0.286	0.121
4933412E24Rik	0.0820624	0.806452		-0.289507	-0.746243	0.294447	-1.67653	0.276808	0.85	-0.32	0.107907	-0.140941		0.0550163	-0.273956	-0.263014	-0.40035	0.263338	0.00756775	0.166491	0.145485	-0.108126	-0.0752263			0.0971678	0.19			-0.0186012	-0.174597	0.679	0.066
4933413G19Rik	0.42628	0.387097		0.487266	-0.0513012	1.52878	-1.47275	0.02724	0.85	-0.235																	0.00333333			0.0502255	-0.0537348	0.201	-0.3965
4933414I15Rik	0.114065	0.419355	0.369865								-0.0087892	-0.214406		0.0794327	-0.0457336	-0.340342	-0.23958	0.0240415	-0.219303	0.084995	0.0478942		-0.0530653			-0.0633284
4933415F23Rik	0.231412	1	0.679847	0.157541	0.222392	-0.447459	1.89812	-0.0183117	0.26	0.165	-0.0333211	-0.0752566	-0.110405	-0.0562876	-0.00276312	-0.117776	-0.173853	-0.0391774	-0.0891055	0.0556131	0.251236	-0.0527916	-0.038625	-0.163333	-0.0366667	0.0112567	0.00666667	-0.234055	-0.145269	-0.102646	-0.063357	-0.3175	-1.263
4933416C03Rik	0.0528887	0.83871		0	-0.469485	-1.96347	0.415037	-0.206543	0.12	-0.485	-0.0147608	-0.158919	0.172704	0.219969	-0.0833636	-0.204205	-0.148386	0.109926	0.0308775	0.122777	-0.0109746	-0.0894163	-0.0622879			-0.023385	-0.116667			0.125434	0.0973862	-0.445	-0.218
4933417A18Rik	0.0885976	0.967742	0.258696	-0.0848889	1.25376	-0.29956	-0.662965	-0.207942	0.215	-0.205	0.0479018	-0.305904	0.0646353	0.00890216	-0.210884	-0.0564964	-0.326215	-0.0097928	0.00982397	0.113387	0.0757105	0.095122	0.0218183	-0.04	-0.41	0.0586193		-0.24515	-0.208179	-0.0338602	-0.0344989	0.604	0.823
4933421I07Rik	0.150556	1	0.281753	-1.23349	-0.302563	0.214125	0.0874628	-0.199118	0.46	-0.365	0.180811	-0.322716	-0.0471458	0.154129	-0.340105	-0.0690455	-0.153981	0.0207662	-0.0668261	-0.0633958	0.275396	-0.0094438	0.0761428	0.00333333	-0.0666667	0.196366	0.14	0.127361	-0.171143	-0.228633	-0.0369241	0.2	0.064
4933425L06Rik	0.0950192	1	0.264146	-2.51271	0.691878	-1.20163	1.58496	-0.289943	-0.085	-0.195	0.0144481	0.21439	0.0331329	0.0822029	0.0823949	0.100859	-0.0152628	-0.0228219	-0.140306	0.0820355	0.0118796	0.161636	-0.0940901	0.0766667	-0.153333	-0.0692495	0.213333	-0.0499481	-0.0837551	-0.258082	-0.329813	0.167	-0.228
4933427D06Rik	0.0685985	0.870968	0.350239	-0.469772	-0.655193	-0.48135	0.674496	0.102564	0.280864	-0.0124765	0.195849	-0.0528311	-0.0878436	0.133067	-0.0310263	0.0988829	-0.346259	0.167205	0.0443511	0.041356	0.0615987	0.0455942	0.0271159			0.104894	-0.07			0.0424142	-0.081703	-0.089	-0.006
4933427D14Rik	0.524345	0.870968	-0.46309	-0.169457	-0.273971	0.277332	0.431157	-0.399923	-0.545	0.395	0.102692	0.0121768	0.362924	0.11673	0.179645	-0.0102408	0.0926048	-0.133998	0.00727174	0.131563	0.0217789	-0.0744904	-0.160932			-0.343803	-0.02			-0.108404	-0.409996	-1.0225	-0.0465
4933427G17Rik	0.0763723	0.741935		-0.894103	0.370308	-0.843704	0.321928	-0.299099	0.306048	-0.45	0.0287007	-0.113873		0.066258	0.222539	-0.144316	-0.0617533	0.0621574	0.00845507	0.179399	0.145131		-0.0949226			0.120517				0.213727	0.242645	-0.051	0.048
4933427I04Rik	0.0809233	0.387097									-0.169143	-0.0973752		0.230947	-0.323626	-0.241863	-0.0851178	0.36164	0.211517	0.0340702	0.132015		-0.0498881			-0.00538846
4933427I18Rik	0.0618199	0.0967742																									0.0266667					0.383	-1.591
4933428G20Rik	0.442816	0.516129	-0.124918	-0.525682	-0.239007	-1.5656	2.92811	0.160423	0.335	0.005			-0.142199											-0.01	-0.146667		0.02	0.136647	0.132832	-0.103577	0.0946532
4933428M09Rik	0.111672	0.774194		-0.365649	-0.950418	2.56953	3.58081	0.126115	0.925	-0.08	0.0593451	-0.271706		0.100882	0.184272	-0.103577	-0.0937408	-0.0451019	-0.0411098	0.0233072	0.0577031		0.0231597			0.0108685	-0.03			-0.0398972	-0.282578	-0.3	-0.5555
4933430I17Rik	0.0728615	0.870968	0.199299	-2.40551	-0.265142	-0.505235	-2.3468	-0.087835	0.26	0.04	0.153645	0.121226	0.0919406	0.289844	0.0816822	0.00285516	-0.393473	0.0828037	-0.147685	-0.0270955	0.0480083	-0.00958043	0.0214676			0.0442068	0.156667			-0.13163	-0.083976	0.005	0.399
4933433C11Rik	0.115612	0.806452		0.0107264	-0.0103419	-2.22239	0.465664	-0.311168	0.685	-0.48	-0.134474	0.0177082		-0.183116	-0.190964	-0.0770049	-0.130155	-0.118716	0.0965148	0.0646226	-0.0696874	0.0365261	0.136735			0.00947769	0.0733333			-0.0331059	0.0123036	-0.476	-0.329
4933434E20Rik	1.67354	1	-0.453319	-0.305938	-0.366383	-0.17087	0.223931	-0.658118	0.0390794	1.52379	-0.174165	-0.0626536	0.164527	-0.0697313	-0.107849	-0.00401504	0.0970541	0.0146296	0.264456	-0.35171	-0.0901012	-0.196671	-0.0217354	0.0466667	0.23	-0.173906	0.06	-0.0631385	0.373866	-0.0848961	0.0318036	0.043	0.0906667
4933436I01Rik	0.0918185	1	0.326508	1.98351	-0.415037	-0.706269	-0.756729	-0.028935	-0.01	-0.135	-0.0368784	0.0596766	0.0197701	-0.0164589	-0.140584	-0.0653419	0.0789715	-0.0669334	-0.0498092	-0.0979913	0.149148	-0.0254029	0.0945084	0.17	-0.24	0.0816994	0.0166667	0.0186634	-0.0454859	-0.100152	-0.0175418	0.153	-0.144
4933440N22Rik	0.0439534	0.354839		-0.514573	2.10852	-0.472068	-0.296718	0.107815	-0.205	0.135																				-0.0295081	0.440784	0.431	0.15
5031410I06Rik	0.167244	0.548387	-0.21572								0.492811	-0.172915	0.083034	-0.012732	-0.234584	-0.143726	0.241172	0.0812976	-0.0894462	-0.21584	-0.162676	-0.0630246	0.0559278			3.45496						-0.115	-0.045
5031414D18Rik	0.110996	0.580645	-0.582006								-0.296785	-0.282719	-0.0253696	-0.142085	-0.102725	-0.169004	-0.571493	-0.120357	-0.0959418	-0.26455	-0.141855	-0.155106	0.00887011			0.0485487	0.03					0.545	1.9
5031439G07Rik	2.03996	0.935484		-0.132696	-0.156649	-0.275976	0.752024	0.409899	-1.64476	-1.96555	0.0384441	0.242765		-0.0729302	-0.0490307	0.123819	-0.123079	-0.0475915	0.089152	0.166644	0.156816	-0.143007	0.273393	0.156667	0.03	0.0320273	-0.2	0.280604	0.219861	-0.0698715	-0.024298	-0.032	0.173
5330417C22Rik	0.175713	0.967742		-0.205732	0.666106	-0.782453	-0.0570997	-0.682494	0.351115	0.109631	-0.016672	-0.185184	-0.254419	-0.0351549	0.145514	-0.0191473	-0.0457676	0.189438	0.152182	-0.0111753	-0.0842659	-0.0489955	-0.0568568	0.13	0.0666667	0.0126342	-0.0966667	-0.0388323	-0.0861229	-0.10452	-0.056692	0.1035	0.1715
5430401F13Rik	0.0414398	0.451613									-0.11385	-0.0242966		-0.157033	0.119074	-0.0152772	0.281944	-0.0429574	0.0319518	0.0497828	0.13729		-0.10437			0.0976302						0.226	0.289
5430402E10Rik	0.0232964	0.290323		-0.111031	0.0489096	1.1375	1.39855	-0.29645	0.125	0.09																				0.0150853	0.0164876
5430403G16Rik		0.0645161																														-0.018	0.101
5430419D17Rik	0.20162	0.870968	0.03706	-0.376474	-2.24598	-0.644076	0.725378	-0.00743333	0.55	0.28	-0.240855	0.123378	-0.0560259	-0.00754419	-0.288587	-0.0224775	-0.0622372	-0.193123	0.100483	0.134084	0.146	0.999744	0.00756069			0.067236	0.0733333			-0.07621	0.00986075	-0.015	0.209
5430421N21Rik	0.886278	0.451613		0.421604	-0.480391	-0.386355	0.325576	-0.19063	0.615	-0.135														0.0333333	-0.263333		0.0533333	0.09853	0.024237	-0.0862582	-0.19504
5430427G11Rik	0.118376	0.354839		0.208947	-0.50178	-0.880185	-0.235943	-0.376613	0.4	0.56																				0.010005	-0.0496714	-0.733	-1.366
5430427O19Rik	0.033343	0.806452		0.397335	-0.192645	-0.913585	1.38904	1.38098	0.065	0.365	0.00584619	-0.148052		-0.704314	0.264621	-0.405516	0.0340029	-0.0375601	0.00500204	0.178821	0.00019789	-0.0899398	-0.0715183			-0.144965	0.02			-0.128494	0.0759248	0.635	0.5385
5530400C23Rik	0.0298325	0.741935		0.303392	1.58496	-1.10692	-1.09433	-0.0225117	0.255	-0.415	0.0626546	0.13383		0.414394	-0.253964	-0.316266	-0.167492	-0.0248498	0.094356	-0.123272	0.0868335		0.181418			-0.101365				0.125569	-0.0398371	0.057	-1.594
5530401A14Rik	0.0460396	0.354839		0.135777	0.369573	-0.0824622	0.594744	-0.309615	0.05	-0.16																				0.0141284	-0.185786	-0.4925	-0.146
5730407I07Rik	0.058732	0.741935		-0.841142	-0.377824	-1.50974	0.607564	0.11447	0.84241	0.0893044	0.00534088	-0.0871823		0.13103	-0.141724	-0.0107899	-0.0860587	-0.0776383	-0.128465	-0.0240789	-0.165597		0.605283			-0.017617				0.100422	0.156568	0.577	-1.29
5730409E04Rik	0.230931	0.83871		-0.429349	0.736966	-0.646363	-1.14543	-0.411352	0.695	0.205	-0.0720915	-0.401365	-0.124195	-0.0965967	-0.0125351	0.061146	-0.0823466	0.0442556	0.0466874	0.173649	0.0964148	0.072271	-0.0445286			-0.107101	0.14			-0.0489736	-0.167578	-0.247	-0.261
5730455P16Rik	0.467262	0.83871	-0.861076	-0.437521	0.068351	-0.63395	0.199076	-0.871844	-0.932067	-0.199557	0.00606636	0.0111712		0.242485	0.0108721	0.26836	0.197748	-0.326256	-0.315757	-0.235789	-0.240117	-0.0193839	-0.199147			-0.222009	-0.0266667			-0.0449115	-0.00320609	-0.099	0.13
5730471H19Rik	0.144848	0.806452		0.289507	-0.879274	-2.0752	-0.129792	0.532045	-0.005	-0.055	0.157158	-0.0555567		-0.282611	-0.0873913	-0.137766	-0.113727	0.0103097	-0.121573	-0.488837	-0.48619	-0.158393	-0.127799			0.120127	0.176667			1.09361	1.15921	-0.098	1.48
5730507C01Rik	0.191385	0.806452		-0.282934	-0.463043	-0.456638	0.533979	-0.272453	-0.58	-0.195	-0.392101	-0.075963		-0.176878	-0.254929	-0.00739459	-0.118004	-0.217695	-0.164787	0.270571	-0.326409	-0.204273	0.0911504			0.00583832	0.0233333			0.363627	-0.549799	-0.508	1.139
5730508B09Rik	0.576276	0.870968	-1.99649	-0.875258	-0.470645	-1.16852	-0.288339	-0.866689	-1.14499	1.35541	-0.249966	-0.276355	0.00891212	-0.202845	-0.32149	-0.162641	-0.0998862	0.180042	0.115255	-0.512513	-0.409036	0.00860245	-0.0597329			-0.164785	-0.406667			-2.11729	-1.0082	0.217	-0.563
5730522E02Rik	0.217697	0.806452		-1.04924	0.0638465	1.523	0.767957	-0.31975	0.275	-0.23	-0.0563748	-0.218485		0.173409	-0.0319331	-0.119165	-0.292944	0.133443	0.0923667	0.0653121	0.283134	0.029788	0.0354777			-0.0177384	0.0766667			-0.223011	-0.282666	0.558	0.492
5730559C18Rik	1.37658	0.83871	0.469761	-0.0776393	0.10387	1.02997	0.960465	-0.512399	0.0136939	0.229784	0.553106	0.680612		0.0995177	0.0175371	0.105468	0.013829	-0.252451	-0.013445	0.759367	0.74701	-0.0675789	0.238839			1.10484	0.796667			-0.197547	-0.415548	0.009	-0.318
5730585A16Rik	0.0266025	0.451613									-0.209009	-0.00616234		0.0875783	-0.0939783	-0.0125821	0.102051	-0.173692	-0.0929928	-0.0466129	0.0746697		0.110233			-0.0278808						0.212	0.024
5830411N06Rik	0.133318	0.806452		-0.127419	0.410346	0.131406	0.339378	0.105275	1.295	-0.14	0.0133037	-0.285089		0.179034	-0.317769	-0.271072	-0.127388	0.355558	-0.0498146	-0.0288022	-0.0110909	0.0320058	-0.0156618			0.00761643	0.0633333			-0.0547006	-0.324097	0.232333	0.421667
5830415F09Rik	0.347285	0.83871		-0.390177	-0.230019	-0.172151	0.558633	0.109187	0.5	-1.175	0.247259	-0.0821832	0.00532273	0.156616	-0.00716789	-0.189996	-0.143216	0.0180062	-0.109545	-0.108358	0.229932	-0.0344584	-0.000501423			-0.206804	-0.25			0.115505	-0.377144	-0.0615	0.0315
5830419E12Rik		0.0645161																														-0.211	0.633
5830472F04Rik	0.137243	0.387097									0.0509362	-0.0218655		0.0334023	-0.284956	-0.0695667	-0.382459	-0.0303803	-0.0997053	-0.331414	-0.453229		-0.120279			-0.0246768
5830473C10Rik	0.0481322	0.451613									0.203384	0.0698766		0.276084	-0.0575598	0.0602259	-0.439329	-0.00994222	0.0563366	-0.0620302	0.0743119		0.515862			0.14405						0.0145	0.5195
6030419C18Rik	0.217652	0.870968	0.0958024	-0.402098	0.807355	0.584963	0.607683	0.0700117	0.475	-0.195	-0.0675504	-0.256602	0.268404	0.0368718	-0.0277487	-0.219345	-0.284251	0.170404	0.194878	0.155871	0.211145	-0.0175403	0.0206429			-0.141825	0.38			-0.0800545	-0.160277	-0.282	0.3275
6030458C11Rik	0.529987	1	-0.549131	-0.553913	-0.290039	-0.51661	-0.13395	-0.559094	-0.334439	0.0282153	0.155987	0.211655	0.0232648	0.10582	0.241384	0.26488	0.123018	0.153733	0.163085	-0.190363	-0.179949	0.0305233	-0.0183498	0.123333	0.14	0.179211	0.156667	-0.0734096	-0.0637985	0.361101	-0.251653	-0.344	-0.375
6030468B19Rik	0.140949	0.806452		0.150243	0.256775	-0.188445	0.563429	0.196423	0.855	-0.235	0.247669	0.07022		0.180481	-0.504855	-0.171742	-0.402027	0.235938	0.138333	0.173982	0.220524	0.0149013	0.0137796			0.179895	-0.0166667			-0.0169322	-0.0864518	-0.021	-0.287
6030498E09Rik	0.0398779	0.870968	0.539667	-0.0995357	0.277853	-0.736966	-0.924899	-0.0459967	0.505	-0.3	0.0166033	0.0899885	0.0131548	0.00774363	-0.375489	-0.388105	0.154661	0.160066	-0.0190645	0.0872605	0.317361	0.388207	-0.208939			-0.119371	0.06			0.323963	0.159927	0.482	0.0715
6330403A02Rik	0.14291	0.516129									-0.0317077	-0.0706561		0.037128	-0.168097	-0.136422	-0.415755	-0.0194958	-0.0633756	-0.0268183	0.137196	0.0285293	-0.0626304			0.0646412	0.103333					0.0673333	0.166667
6330408A02Rik	0.237247	0.967742		-0.410472	-0.384482	0.618321	1.03905	-0.208915	0.403392	0.0670357	0.13281	0.0119406	-0.12729	0.0611479	0.00637072	-0.325173	-0.234571	0.112544	-0.0809818	-0.189211	-0.0643686	-0.0495813	0.313488	-0.193333	-0.243333	-0.137131	0.206667	0.11478	-0.0105739	0.080078	0.129942	0.489667	0.0916667
6330409D20Rik	0.0765362	0.741935		0.62121	-0.24503	1.44667	0.267502	0.126645	0.6112	0.41367	-0.214083	0.075057		0.0253244	-0.0258058	-0.0215936	0.0261441	-0.0197043	0.206967	0.0283333	-0.00965054		-0.00459527			-0.175403				0.0312409	0.0822407	-0.049	-0.086
6330416G13Rik	0.295087	1	0.664545	0.70118	-0.412325	0.759999	1.42651	0.365864	0.119907	-0.23367	0.153837	0.152959	0.144182	0.13518	0.486567	-0.0229086	0.686205	0.0340282	0.00455465	0.476071	0.584361	-0.125616	-0.0149538	0.00666667	0.133333	1.36984	1.45	0.105027	-0.00149016	1.07823	0.774409	-0.0423333	0.0163333
6330444E15Rik	0.0555645	0.419355	0.77783								-0.0558214	-0.0157085		0.128893	0.0339612	0.0791143	-0.342845	0.0480356	-0.00748192	0.108572	0.247496		-0.0475321			-0.0316531
6430531B16Rik	0.0907957	0.83871		-0.61808	0.623938	0.61891	2.53417	0.0181517	0.255	-0.175	-0.0897872	-0.0783233	-0.20173	0.116391	-0.25309	0.042443	-0.0793807	-0.0775151	0.235974	0.148191	0.121637	-0.0794603	0.0664104			-0.0468804	0.106667			0.0384691	-0.0870321	0.101	0.0085
6430548M08Rik	0.393361	1	-0.498966	-1.49697	-0.660501	-0.763127	0.172159	0.154384	0.737644	-0.183483	0.150243	-0.110632	-0.0412829	0.0271261	-0.413819	0.0962918	0.0798783	0.0145931	-0.0689969	0.108901	0.234696	0.155418	0.0394175	-0.286667	-0.0366667	-0.384922	0.183333	0.040301	0.0262425	0.112557	0.0426613	-0.27	-0.569333
6430550D23Rik	0.1419	0.516129									-0.142473	-0.403464		0.0505102	-0.0705452	-0.305718	-0.263321	0.111617	0.421457	0.0191233	-0.0466154	-0.0434463	0.140094			0.122674	-0.0366667					0.6075	0.0885
6430571L13Rik	0.0772877	0.83871		0.677005	0.0363658	0.192667	0.631781	-0.155407	0.261001	-0.498857	-0.172716	-0.0313796	0.0126452	-0.136565	-0.0800422	-0.161517	0.0052786	-0.0501615	0.0227453	0.155704	0.199952	0.10882	-0.00188132			-0.0307105	0.0166667			0.0148287	-0.0167129	-0.63	0.133
6430573F11Rik	0.119558	0.870968	0.631519	-2.00891	-1.67077	-1.31358	-1.05001	-0.92937	0.257502	0.241247	0.0124402	-0.179152	-0.107274	0.210998	-0.0738004	0.333387	0.0829013	0.126827	-0.114283	-0.0132808	0.114909	-0.0474844	-0.00255245			-0.03145	0.0966667			0.0986357	0.120963	-0.464	0.093
6530402D11Rik	0.101372	0.451613									0.0215058	0.0104014		0.123575	-0.124148	0.10919	-0.287351	0.170817	-0.0419243	0.0532519	-0.000859557	0.0561092	0.0426254			0.104973	0.0366667
6530409C15Rik	0.0844774	0.354839		-0.925146	0.296493	-3.66425	1.51873	-0.104008	0.685	-1.005																				-0.0322821	0.0731359	3.092	2.993
6720473M11Rik		0.0645161																														0.063	0.008
6720489N17Rik	0.251169	0.806452		-1.19767	-0.393484	0.0529603	-0.0723786	-0.612693	0.0301518	-0.150288	-0.485348	-0.674048		-0.735099	0.236967	0.667163	0.364943	-0.653843	-1.18133	-0.62581	-0.547781	-0.33052	0.106556			-0.647658	0.17			0.238713	0.197702	-0.003	0.7335
6820408C15Rik	0.108245	0.870968	0.301109	-0.635039	0.241008	0.0187366	1.64981	0.159533	-0.05	-0.76	0.265314	-0.104049	0.0709161	0.0815631	0.0196881	-0.114571	-0.0819479	0.318078	0.0393156	0.0146272	0.109788	-0.0528921	0.0580018			0.0593018	0.0733333			0.192025	0.0705168	0.643	0.549
7030419G21Rik		0.0645161																														-0.001	0.156
7420426K07Rik	0.144519	0.548387									0.175715	-0.236237	-0.103924	0.0607801	-0.056661	-0.299355	-0.360767	0.0830469	0.0351802	0.141397	0.0127168	0.143716	0.049212			0.0349574	0.0233333					0.064	0.465
7420461P10Rik	0.0324811	0.0322581																									0.19
8030411F24Rik	0.0642428	1	0.301812	-0.0437214	0.21205	-0.218001	-0.404696	0.0927667	0.2	-0.735	0.0849245	0.142125	0.134847	0.27132	-0.216614	0.111464	-0.0731743	-0.0026381	-0.0887549	-0.216833	0.0802768	0.137078	0.120643	-0.136667	0.303333	0.00970079	-0.0433333	0.0947611	-0.00958466	0.110387	-0.0637798	0.292	-0.254
8030423J24Rik	0.093675	0.741935		0.316027	0.154723	-0.357157	-0.0216951	0.119562	0.91	0.25	0.0253016	-0.0265171		0.24342	0.198404	-0.159715	-0.0603638	-0.0102054	0.0384696	0.153622	0.049101		-0.023585			0.144944				-0.182416	-0.337938	1.62	1.839
8030462N17Rik	0.388631	0.870968	-0.124472	2.65803	2.56682	0.796467	-0.309783	0.134765	0.46	0.095	0.381167	0.372885	0.02562	0.0121275	0.134748	0.0815158	0.321872	-0.122033	-0.268584	0.177717	0.144663	-0.113461	-0.507096			0.129497	0.333333			0.125866	0.220572	0.069	-0.0955
8030474K03Rik	0.0857452	0.774194		0.358855	-0.619728	0.78182	2.66513	0.24541	0.77	-0.465	-0.0915348	0.0815409		0.271935	0.106265	0.0530046	-0.067788	-0.172493	-0.16074	-0.043853	-0.148783		0.0540452			0.153022	0.29			0.0704379	0.0343313	-0.03	0.379
8430408G22Rik	0.513088	0.870968	0.418906	0.0471132	-0.0907236	0.671415	-2.66234	-1.00663	1.1667	0.564529	-1.69086	-0.919721	-3.35945	-0.376693	-0.914691	-0.126864	-0.726736	-1.02935	-0.148752	-0.90188	-0.987459	1.78625	2.43488			-0.472877	-0.536667			0.0695145	0.77916	-0.31	0.899
8430419L09Rik	0.4736	1	-0.304916	-0.760501	0.0710347	-0.510149	0.311223	0.133313	0.0887321	-0.860017	-0.291151	-0.398018	-0.00604999	-0.0702619	-0.24916	-0.212517	-0.0815092	-0.0341201	-0.0248443	-0.246582	-0.416584	0.00174475	0.557715	0.0266667	-0.0766667	0.0283859	0.163333	-0.0932561	0.247012	0.105613	-0.125506	0.00633333	0.0633333
8430423G03Rik		0.0645161																														0.429	0.248
9030025P20Rik	0.590242	0.129032	-1.13642										-0.122702																			0.157	-0.483
9030617O03Rik	0.793457	1	-1.14724	-0.357427	1.43921	0.00131513	-0.188626	0.495128	-0.725	0.155	-0.161358	-0.0516634	-0.0713591	0.139325	0.377434	0.356221	0.118511	0.716034	0.0757847	-0.494015	-0.51575	0.200167	0.0215879	-0.22	0.1	-1.55574	0.243333	-0.34406	0.203193	-0.0171962	1.13037	-0.0875	-0.0405
9030624G23Rik	0.865691	0.387097									-0.299256	-0.341175		0.0502702	0.286582	0.422143	0.107072	-0.277497	-0.0583337	0.0218052	0.040458		0.00102426			-0.220111
9030624J02Rik	1.15716	1	-0.112877	-0.269625	-0.153439	-0.807919	0.627383	-0.401082	0.0523545	0.275747	0.062207	0.172896	-0.200179	0.0902312	0.20203	0.0701819	0.142105	0.0890361	-0.0198169	0.21231	0.13727	0.0117167	0.359188	-0.0833333	-0.25	-0.0316176	0.0133333	0.368987	0.356524	0.0911598	0.434417	-0.063	-0.100333
9130008F23Rik	0.286746	0.870968	0.404834	-0.541354	0.307324	-0.17536	0.230039	0.952572	-0.48	-0.31	0.292216	0.445901	-0.00636941	-0.127638	0.282641	-0.128141	-0.205211	-0.250304	0.0967924	0.00595334	0.121213	0.0946072	-0.194118			-0.312244	0.28			0.638452	-0.764419	-0.046	-0.846
9130011E15Rik	0.406726	0.870968	-0.573046	-0.228557	-0.682403	-0.355916	-0.0495496	-0.142237	0.07	-0.14	-0.195591	-0.155363	0.0899832	0.164842	-0.113078	-0.0380364	0.0341018	-0.314912	-0.211466	0.0931951	0.0620687	0.18329	-0.0910921			-0.0464882	-0.103333			-0.243132	-0.0383418	0.358	0.0995
9130019O22Rik	0.21307	0.870968	0.209377	0.967909	0.15372	-0.00252087	0.673687	-0.501168	0.298126	0.171575	-0.0280711	-0.083104	0.00398591	-0.0687582	-0.0740388	-0.193576	0.0133889	0.132702	0.259564	-0.0186574	0.0881154	-0.0441821	0.0886333			0.106526	0.08			-0.0734251	0.0229796	-0.0876667	-0.126
9130023H24Rik	0.56836	0.806452		-0.911568	-0.347003	-0.470079	0.404993	-1.68113	-0.945	0.365	0.119233	0.165463		-0.0313141	-0.112546	-0.0601467	-0.0156554	-0.257088	-0.137734	0.0688584	-0.171015	0.153584	0.165073			-0.454071	-0.216667			0.0693631	0.214303	0.168	-0.068
9130204L05Rik	0.0165814	0.354839		0.347923	0.0506261	0.206451	0.321928	-0.069695	0.225	0.11																				-0.0634093	-0.116352	1.799	1.325
9130230L23Rik	0.0657394	0.548387	0.276078								-0.00711471	-0.0851093		-0.135298	-0.371949	-0.262416	-0.0316746	-0.0635798	-0.0655662	-0.359235	-0.105965	-0.0150821	-0.0472272			-0.148098	-0.0733333					-0.94	-1.667
9130401M01Rik	1.56979	1	-0.237926	-0.0854538	0.492834	0.077921	0.551324	-0.163837	0.27	0.595	0.195266	-0.0907546	0.109746	-0.184413	0.064825	0.144657	0.238128	0.0807155	-0.15996	-0.22544	0.0109242	-0.237433	-0.121658	-0.0766667	0.143333	0.256211	0.17	-0.525761	-0.648368	-0.067152	-0.496745	-0.0695	-0.1895
9130409I23Rik	0.0531443	0.83871		0.388772	1.1375	3.90689	-1.15754	-0.00137	0.17	-0.4	-0.0894078	-0.0158972	-0.00207152	-0.255891	0.240761	-0.167863	0.0517349	0.17019	0.0760611	-0.084623	-0.113336	0.047574	0.0580767			0.091306	-0.14			-0.129356	0.100586	-1.268	-0.639
9230102O04Rik		0.0645161																														0.05	0.006
9230104L09Rik	0.0754255	0.870968	-0.112811	-2.66504	-1.48328	-0.282693	3.01424	-0.63891	0.285	-0.405	-0.125433	-0.504603	-0.410863	0.0867393	-0.335919	-0.111541	-0.266743	0.506812	-0.00708076	-0.0499134	0.127143	0.130639	0.098273			-1.57197	0.03			0.0705576	-0.0270197	0.146	-0.328
9230110C19Rik	0.192891	0.870968	-0.216936	-0.509139	0.0243704	-1.03986	-0.0350292	-1.24128	-0.395	-0.13	-0.0470324	0.270683	0.213343	-0.293944	0.0817143	-0.142857	-0.315485	-0.549403	-0.221578	0.0304262	-0.295346	0.218747	0.443483			0.678779	-0.483333			0.476845	0.454197	-0.129	-0.14
9230110F15Rik	0.0326388	0.806452		1.365	0.0740006	-3.34792	-2.848	0.209942	0.22	-0.365	0.160193	-0.311652		0.21036	-0.137042	-0.0229143	-0.316242	0.120332	-0.164877	-0.162424	-0.0600217	-0.0853709	0.0330116			-0.210177	0.463333			0.021433	0.00414884	-1.395	-1.321
9230112D13Rik	0.0592182	0.741935		0.194447	0.00287104	1.365	0.899933	0.180907	0.695	0.335	0.0859947	-0.28961		-0.0751348	-0.00582166	-0.263382	-0.188124	0.162842	0.0614956	0.126844	-0.0848501		-0.0428243			0.0572747				-0.00109553	0.0800955	-0.411	-0.061
9230113P08Rik	0.022294	0.419355									0.08503	0.00921355		-0.0056481	-0.208594	0.0761311	-0.0720685	0.0121311	0.0131591	-0.0112689	-0.0801757	-0.031058	0.120014			0.0804214
9330159F19Rik	0.127597	0.806452		0.108706	-0.447614	0.386114	0.3751	0.0120951	-0.262013	0.241606	0.557645	-0.0969775		-0.145028	0.0951234	0.0210274	-0.575145	-0.265786	-0.203572	0.402281	0.00627019	0.136314	0.180586			-1.06883	-0.0566667			0.301833	-0.293654	-0.681	-1.432
9330159N05Rik		0.0645161																														-1.281	-1.458
9330171B17Rik	0.054363	0.677419		1.52356	-0.847997	0.584963	0.70044	-0.030615	0.37	-0.255	0.0363772	-0.0293328		-0.199417	-0.409811	-0.335712	-0.259413	-0.0467747	-0.0752948	-0.0908276	0.198709		0.044163			0.0943667				0.188628	-0.0433578
9330182L06Rik	0.0481392	0.870968	-0.0980507	-1	3.10434	0	0	-0.843915	0.265	0.02	-0.0651492	-0.00248935	-0.0724216	0.195271	-0.202089	-0.021474	-0.219402	-0.172266	-0.0772759	0.116202	0.131591	-0.00805101	-0.0393101			-0.0119417	-0.07			-0.0159551	0.15282	-0.122	-0.1295
9430007A20Rik	0.172784	0.580645	-0.0592424								-0.0514236	0.209279	0.00438856	-0.279448	-0.167601	0.960378	0.689104	-0.0283289	0.106963	0.0872323	-0.045495	-0.123647	-0.069842			0.00204521	3.20343e-16					0.294	-0.096
9430015G10Rik	0.592974	1	-0.439098	-0.561238	-0.251539	0.24088	-0.0381963	-0.158378	-0.33	-0.475	-0.0907646	-0.509751	0.0651956	-0.0408655	0.0704169	-0.161135	0.0315418	0.0456458	-0.112728	-0.341531	-0.215919	-0.191118	-0.216767	-0.19	-0.243333	0.0924984	0.0633333	-0.443735	-0.544852	-0.197313	-1.01233	-0.1215	0.0745
9430016H08Rik	0.677596	0.967742	-0.593735	-0.965032	0.38025	-0.908425	0.743603	-0.704191	0.0159614	0.931427	0.175274	0.0867796		-0.0601581	-0.0198364	0.0673241	0.568563	0.311863	0.230313	-0.0840147	-0.0425636	-0.260312	-0.142361	0.0333333	-0.01	0.0117131	-0.12	-0.0882159	0.170621	0.0461191	0.0698765	-0.171	-0.268
9430020K01Rik	0.903665	0.806452		-0.047872	0.266021	0.247269	0.685192	1.21913	-0.817309	0.0235241	0.351027	0.560548		0.230785	0.675256	0.242418	0.181526	0.544316	0.353774	0.28109	0.284069	0.298028	0.0766911			1.49633	1.31			0.481393	0.660907	-0.279	0.466
9430038I01Rik	0.286515	0.806452		-0.185571	-0.286904	-0.81231	0.0646818	-0.202443	0.367849	0.276195	-0.159615	-0.0352479		-0.11481	0.0739804	-0.014509	0.0385874	-0.106087	-0.000416295	-0.145783	-0.019463	-0.196858	-0.0165517			-0.14772	-0.413333			-0.103459	-0.0468641	-0.301667	0.101333
9430069I07Rik	0.107029	0.806452		0.185556	-0.885541	-1.94006	0.186701	-0.246782	0.94	0.255	0.0674504	-0.371234		0.158412	-0.0833848	0.00111863	-0.0983374	-0.0173735	-0.139661	-0.108413	0.207338	-0.0630068	0.0289513			0.222371	0.376667			-0.142837	-0.194256	-0.0695	0.143
9530002B09Rik	0.185599	1	0.572994	-2.0607	-1.72991	1.66802	1.66297	-0.00689	0.175	0.77	-0.100911	-0.241269	-0.0938183	0.0244919	-0.0695252	-0.153418	-0.107726	-0.0730031	0.105265	-0.107081	0.310094	-0.0989037	-0.0169738	-0.0166667	-0.196667	0.00129875	-0.0366667	0.0241301	0.0915845	-0.0102468	0.0807462	-0.214	-0.412
9530003J23Rik	0.0429559	0.870968	0.0827008	-1.49596	-0.63743	0.447459	1.51457	-0.0120117	0.14	-0.345	-0.133239	-0.167948	-0.00946671	0.136124	0.0189706	-0.23013	-0.217025	-0.0249566	0.0973141	0.0802783	0.529086	0.0172517	0.0194423			-0.0490742	0.0833333			0.108587	0.207014	1.388	2.294
9530020O07Rik	0.152421	0.741935		-0.135515	0.437758	-0.348275	-0.470079	-0.0829383	0.695	0.255	0.0393843	0.141635		0.437592	-0.0491892	-0.0373557	-0.194222	0.262289	0.121821	-0.00124482	0.0683258		0.0129789			-0.186807				-0.0158808	0.0872667	-0.3645	-1.343
9530053A07Rik	0.275691	0.548387									-0.00708392	-0.402519	-0.011881	0.083526	-0.0317117	0.127095	0.1774	0.0834207	0.121751	-0.00580154	0.104537	-0.029648	-0.0480748			0.108056	0.07					0.335	-0.012
9530068E07Rik	3.50235	1	0.192003	-0.252852	-0.353302	-0.0425273	0.128436	-0.0288459	-0.339559	0.115462	0.47444	0.420249	0.240352	0.0619721	0.0720589	0.240181	0.00717428	1.01438	1.12369	0.0443912	-0.0179662	0.141301	0.368225	0.156667	-0.45	0.0591502	-0.00666667	0.281912	0.465479	0.153706	0.227914	-0.078	0.745
9530077C05Rik	0.0939529	0.419355	-0.411052	-0.390981	0.202339	-0.249689	0.749547	0.0218949	0.159568	0.440922			-0.130942																	-0.132208	-0.281005	-0.1465	0.2105
9630041A04Rik	0.113176	0.483871	0.105974								0.0831441	-0.255427		0.114205	-0.153341	-0.288174	0.0105293	0.260846	-0.000981701	0.0917459	-0.00780231		0.0792209			-0.0417601						-0.1745	-0.212
9830107B12Rik	0.0416409	0.548387	0.259145								-0.0336434	-0.282361		-0.120446	-0.126798	-0.375799	-0.428779	-0.0406038	-0.118285	0.0143132	0.237737	0.0555556	-0.0834443			-0.00560404	0.09					0.04	0.02
9830147E19Rik		0.0645161																														-0.4105	-0.1705
9930012K11Rik	0.317556	0.83871	-1.19009	-0.124153	0.0196734	0.0477326	0.595313	1.7264	-0.81	-0.375	-0.150043	-0.44854		-0.184902	-0.347412	0.0901933	-0.0969162	0.215672	-0.0854969	-0.0820655	-0.127012	0.18549	0.262724			-0.305257	0.316667			0.466331	0.622598	0.339	1.192
9930021J03Rik	1.05355	0.870968	-0.197565	1.0796	0.47244	0.212661	0.741038	-0.218608	1.345	-0.02	-0.131611	-0.281142	0.021548	0.0609187	0.00315207	0.0474645	-0.0713975	0.611746	0.686623	-0.186613	-0.254113	0.118258	-0.0045114			0.149318	0.0366667			0.149263	0.050107	-0.137667	-0.0996667
9930022D16Rik	0.0846221	0.419355	0.285614								-0.0221858	-0.195886		0.0773866	0.0289461	-0.188786	-0.516177	0.0754382	0.0231711	-0.0109809	0.0919055		0.0140093			0.030085
9930111J21Rik1	0.415168	0.129032											0.539122														0.7					-0.378	0.05
9930111J21Rik2	0.332225	0.483871									2.40736	1.95229		-0.143754	0.201803	-0.124914	0.3211	0.202397	0.376423	0.930555	0.763774	0.523124	-1.19113			1.38377						-0.175	-0.805
a	0.189842	1	0.500809	-0.158045	0.158931	0.709607	0.785572	0.296373	0.825	-0.32	0.112524	-0.15083	0.0248015	0.0965209	-0.196424	-0.0812572	-0.34982	0.263938	-0.0925059	-0.0196123	0.277463	0.0646151	-0.181451	-0.0166667	-0.186667	0.003746	0.0866667	0.0416646	-0.0120656	0.2709	0.18133	0.898	1.085
A030003K21Rik	0.0813467	0.387097		2.58331	-0.584963	-0.171953	1.85086	0.14997	0.455	-0.65			0.0372427																	0.0213156	0.00492215	-0.283	0.318
A030005L19Rik	0.0662253	0.387097		-0.508256	-2.60204	-0.280736	-0.650971	-0.287498	0.5	0.225			-0.108289																	0.274712	0.117767	0.206	0.133
A030014E15Rik	0.0426092	0.354839		0.23804	-0.636976	-0.275365	1.43063	0.144575	0.36	-0.14																				-0.0759132	-0.208338	0.098	0.221
A130010J15Rik	0.255281	0.870968	-1.1406	-0.525261	0.0329494	-0.310434	0.301143	-1.59034	-1.69002	0.0960086	-0.200581	0.0020081	-0.057855	-0.0484584	0.0938174	0.0188631	0.181953	-0.193966	-0.0715707	-0.185255	-0.217665	-0.142654	-0.0244747			-0.0790737	-0.136667			-0.127116	0.0839227	0.015	0.499
A1bg	0.0581155	0.548387									-0.0097079	-0.143375	-0.00352727	-0.101901	-0.0534838	0.0264945	-0.0688464	0.0520648	0.134806	0.0651435	0.103909	0.129874	-0.167836			-0.00425437	0.02					0.109	-0.668
A1cf	0.0563581	0.83871	-0.0801618	0.559527	-0.347691	-0.693299	-0.6822	-0.324117	0.345	0.335	-0.0538948	-0.0550084		-0.0193889	-0.00519528	0.0235449	-0.00788163	-0.000856495	-0.01274	-0.29384	-0.322599	-0.15116	0.0333023			-0.0178838	-0.09			-0.18165	-0.323795	-0.051	0.338
A230046K03Rik	1.39366	0.935484		-0.4098	-0.241617	-0.236294	1.74598	-0.43695	-1.57212	0.523455	-0.117117	0.115663		0.258326	0.305121	-0.00642438	0.257273	-0.156869	0.187034	-0.102383	-0.0385233	-0.20812	0.0941118	-0.0966667	0.233333	-0.312884	0.383333	0.0215329	-0.078323	0.362386	0.0704494	-0.263	0.051
A230050P20Rik	0.181848	1	0.409768	0.028289	0.0243967	-1.02608	0.0960269	-0.596775	0.49	-0.015	-0.0867854	-0.324447	0.0702791	0.19882	0.650028	0.104804	-0.102777	-0.0259586	-0.12917	-0.0149749	0.148421	0.0139898	0.00827469	-0.486667	-0.243333	-0.0313751	0.0466667	0.0895846	0.127842	0.0284572	0.139202	0.27	0.987
A230065H16Rik	0.145201	0.354839		0.262568	-0.0937301	-0.1668	-0.121406	0.322597	0.5	0.135																				0.0323827	-0.176124	0.024	0.336
A230083G16Rik	0.0789049	0.483871	0.0621899								-0.155248	-0.13451		0.0664125	0.0723274	0.0298928	-0.562974	0.200042	0.192074	0.104798	0.311888		0.0444265			-0.00931523						-0.319	-1.841
A2m	0.562679	0.967742	0.127224	-0.321928	1.8255	-1.926	0.70044	1.42343	0.17	-0.085	0.109009	-0.253591		-0.0620437	0.0376487	-0.339195	-0.28007	0.0622669	-0.11738	-0.00717233	0.248909	0.00896051	0.0835149	0.203333	0.2	0.00538875	0.1	-0.0472301	-0.0411678	-0.0718131	0.0578322	-0.07	-0.097
A330008L17Rik	0.0700795	0.387097	0.607	-0.941098	-0.686725	0.356144	0.366666	-0.0925126	0.00115393	0.035																				0.0435067	0.111095	0.709	0.905
A330050F15Rik	0.0854018	0.354839		-0.40683	0.0724311	1.24665	1.65918	-0.0337703	0.388282	-0.718238																				0.108137	-0.0800224	0.284	-0.065
A330070K13Rik	0.102791	0.419355	0.635549								0.269057	-0.0835683		0.256298	-0.0152443	-0.199072	-0.285003	0.529068	-0.221733	0.0631716	0.311821		0.0128168			0.0257437
A330084C13Rik	0.0876586	0.741935		-2.0813	-0.543335	-0.640458	-0.410088	-0.0595967	0.76	0.35	-0.074443	-0.405728		0.219293	0.12176	0.131162	-0.0514541	0.210952	-0.0104117	0.013362	-0.0249585		0.0298048			-0.0521985				0.052844	0.0666468	0.872	-0.224
A3galt2	0.107521	0.580645	-0.286487								0.0739348	0.018051	0.0366276	0.177241	-0.313409	-0.240681	-0.381153	0.183762	-0.180462	0.0782078	0.0706844	0.131305	0.082499			0.041686	0.223333					0.0575	-0.276
A430005L14Rik	0.638198	1	-0.764133	-0.522027	-0.203059	-0.181162	0.00955304	0.344973	-0.245	-0.615	0.271848	-0.129371	0.119048	-0.184562	-0.105001	0.227225	0.491419	0.106693	-0.160325	-0.149392	0.107904	-0.464302	-0.209335	-0.136667	-0.416667	-0.0855972	-0.2	-0.481088	-0.345575	-0.263278	-0.391376	0.063	0.104
A430033K04Rik	0.366733	0.83871	-0.473191	-0.276505	-0.637772	0.0225586	0.291558	-0.547902	0.0588832	0.0799064	-0.0404471	-0.361971		-0.247595	-0.0749058	0.122299	-0.000319417	0.0740954	-0.188406	-0.0880772	0.0592279	-0.000475629	0.384331			-0.484751	-0.346667			-0.310608	-0.237907	0.172	-0.405333
A430078G23Rik	0.154537	0.548387									-0.112538	-0.242828	0.148352	0.177217	-0.217588	-0.105778	-0.207699	0.113334	0.114096	0.18155	0.222478	-0.0292684	-0.035922			0.028857	0.06					0.176	0.1345
A430093F15Rik	0.0820073	0.83871	0.602746	1.17264	-0.214366	-0.00998409	0.465455	0.147748	0.21	0.25	0.0496052	-0.0306833		0.189979	0.102802	-0.0482554	-0.145661	0.0146586	-0.0954326	0.106995	0.049744	0.0289973	-0.0784814			0.0569866	0.393333			0.107661	0.037317	0.24	0.046
A430105I19Rik	0.631729	0.548387	0.167727								1.0381	0.279982		-0.00382244	-0.276107	0.0187701	-0.428478	-0.0809576	-0.141829	0.29892	0.39548	0.149169	0.282269			-0.857889	-0.443333					-0.117	0.254
A4galt	0.215747	1	0.451337	1.53343	-0.879706	0	0.222392	4.10012	0.19	0.16	-0.273846	-0.169414	-0.108178	-0.22649	-0.752686	-0.263475	-0.757035	-0.0537182	0.125639	0.148662	0.0768104	1.00134	0.0143039	0.0433333	0.07	-0.0297184	0.0633333	0.0334467	-0.0213472	-0.153032	-0.214136	-0.023	-0.616
A4gnt	0.111544	0.83871		0.486878	0.0977368	0.121599	0.00930774	0.25902	0.59	-0.39	-0.0633033	-0.0538583	0.0303546	0.270102	-0.263894	-0.0746253	-0.2123	0.0496482	-0.0632992	-0.140359	0.117825	0.0331313	-0.0256406			-0.0499458	-0.00666667			0.0984313	-0.0567257	0.117	0.093
A530016L24Rik	0.194535	1	-0.0482648	-0.565648	0.88029	0.0767485	1.71303	-0.245381	1.31085	0.0281338	-0.504853	-0.55503	-0.0547481	0.123711	0.0946925	-0.19335	-0.363207	0.0793783	0.0904552	-0.20699	-0.255703	-0.017219	0.00839113	0.0633333	0.183333	-0.0372802	0.11	-0.0718823	-0.224948	-0.174677	-0.169326	0.299	0.286
A530032D15Rik	0.32336	0.548387									-0.063039	-0.0112504	0.064937	0.111811	0.0795042	0.0383812	-0.287959	0.159643	0.0150044	-0.274997	-0.163418	0.214751	0.130408			0.0217261	-0.466667					-0.1925	-0.047
A530064D06Rik	0.0537071	0.580645	0.417585								-0.0323634	0.110185	0.0798842	-0.0243381	0.17955	-0.589871	-0.236085	-0.0448859	0.132415	0.137481	-0.0295982	-0.178303	0.0439918			-0.224273	0.533333					-0.222	0.309
A530099J19Rik	0.0599741	0.580645	-0.241401								0.0154227	-0.0766051	-0.0612508	0.0785683	-0.261147	-0.129949	0.0705872	0.0687192	-0.0848034	0.00499202	0.160287	-0.0185871	0.0938029			0.0977286	-0.02					0.574	-0.072
A630001G21Rik	0.09324	0.83871	0.496736	0.00864755	1.77181	-0.771925	-1.91374	-0.0694667	0.45	-0.055	0.0922456	0.0841669		-0.100165	0.178808	-0.255648	-0.152792	0.245675	0.162303	-0.0692127	0.165802	0.0131822	-0.00862461			0.174075	-0.41			0.0966604	-0.151942	-0.0035	0.3095
A630010A05Rik	0.0255826	0.516129									0.0202048	0.0362638		-0.0794527	-0.229774	-0.0630506	0.245443	-0.105377	-0.0595972	-0.129636	0.049773	-0.0543203	0.234685			-0.0795273	0.0433333					0.504	0.721
A630023A22Rik	0.0925844	0.354839		1.75789	1.70652	-0.262076	0.837447	-0.188435	0.78	-0.085																				-0.221354	-0.267965	-0.694	-0.973
A630033H20Rik	0.0355826	0.870968	-0.612706	-0.697437	0.658963	-0.0892673	-1.90689	0.877612	0.26	-0.21	0.0106635	0.051359	-0.0617509	-0.579894	0.284004	0.131311	0.234215	0.0132435	-0.0102911	0.214064	0.191379	-0.0149349	0.00435975			0.268836	-1.10667			0.0524511	0.0528076	0.068	0.3115
A630073D07Rik		0.0645161																														0.091	-0.306
A630076J17Rik		0.0645161																														-0.766	0.274
A630095E13Rik	0.34097	0.83871		-0.317962	4.56333	1.24066	0.398483	-0.46998	1.03	1.975	1.42314	0.448729	0.00736272	0.0751049	-0.0686741	-0.0618845	0.137492	-0.205097	0.289796	0.249316	0.524553	0.612447	-0.852206			1.9939	1.49667			0.434982	-0.920333	-0.1	-1.42
A630095N17Rik		0.0645161																														0.126	-0.59
A730017C20Rik	0.105389	0.870968	0.727094	-0.961116	-0.637337	-0.368154	1.30972	-0.0227907	0.165343	-0.213915	0.0561708	-0.207514	0.0487878	-0.0844567	-0.0558607	-0.024921	-0.0533068	0.0340988	0.176403	0.0486499	0.209021	-0.159675	-0.0597515			0.00757973	-0.06			-0.118791	-0.088805	-0.419	0.247
A730045E13Rik	0.0777065	0.483871	0.1985								-0.145713	-0.0710543		0.216492	-0.102604	0.0603061	-0.239125	-0.0182291	-0.154084	0.104194	0.059211		0.0795386			-0.0377627						0.028	-0.109
A730049H05Rik	0.0473009	0.0967742	-0.0560799																													0.161	-0.569
A830005F24Rik	0.0820603	0.741935		-2.38003	-0.573735	0.537266	0.736966	-0.333173	0.3	-0.12	-0.0339736	0.0224651		0.213191	0.00409109	-0.220347	-0.177361	0.0497595	0.0777421	0.329738	0.204867		-0.0268504			-0.0941804				0.0244513	-0.00714397	0.233	0.347
A830010M20Rik	0.0854974	0.387097		0.932206	-0.0849178	-0.596555	0.856678	-0.347809	0.0837019	0.185882																	-0.04			-0.211581	-0.0708151	-0.2315	-0.3675
A830018L16Rik	0.0544655	0.870968	0.169876	-3.8134	-1.91754	-2.23133	-0.167295	-1.83978	0.43	-0.165	0.0202856	0.117732	0.22738	0.282932	0.0798063	-0.0561087	-0.136568	0.0966655	-0.072359	0.0378577	0.0478906	-0.208214	0.00231776			-0.0369106	-0.0833333			-0.284319	-0.263245	0.5385	0.522
A830021K08Rik	0.141667	0.806452		-0.691878	-0.125531	-1.18057	0.215729	0.36199	0.24	-0.08	-0.0151987	-0.250397		0.123314	-0.393315	-0.381832	-0.45303	-0.0895062	-0.117452	-0.0111337	0.193127	-0.0593609	0.0316722			0.255063	0.18			-0.305819	-0.505594	-0.226	0.171
A830031A19Rik	0.224349	0.419355	0.462371								-0.133575	-0.481586		-0.0389727	-0.114349	-0.0234174	-0.205541	0.195435	0.0380724	0.070758	0.00806143		-0.0695195			0.000564587
A830080D01Rik	0.772833	0.83871		-0.043534	-0.2164	0.221749	0.0499252	-1.14463	-1.48	0.505	0.147535	0.161519	0.131441	-0.0677477	-0.0970845	0.0345299	0.0199348	0.247719	0.0939588	0.384125	0.227316	-0.139369	-0.958781			0.281026	0.323333			0.324129	0.312609	0.069	0.177
A930004D18Rik	0.237881	0.806452		0.337232	-0.0598438	-0.263306	0.650057	-0.379632	-0.0575979	-0.0633128	0.368483	0.0267366		0.128426	0.213065	0.231119	-0.00435368	0.502127	-0.247625	-0.234598	-0.354888	-0.329141	0.294069			-0.416571	-0.0433333			0.000661697	-0.0719258	0.674	-0.349
A930009A15Rik	0.0484091	0.354839		-0.647178	-1.17075	-0.265189	-0.271596	0.0794567	0.625	0.08																				-0.0320631	-0.15486	0.992	-0.19
A930011G23Rik	0.176456	0.806452		-2.17991	0	0.157101	0.278859	0.304762	0.685	0.26	-0.0704671	0.0734853		-0.121897	-0.064268	-0.267853	-0.427204	-0.0554726	0.0201526	0.0466477	-0.0293781	0.0584497	0.00194558			-0.0705129	0.12			0.201157	-0.194103	0.277	0.098
A930017K11Rik		0.0645161																														0.144	0.078
A930018P22Rik	0.20726	1	0.346541	0.443003	-0.00792692	0.289507	0.0161197	0.07435	0.375	-0.545	-0.125551	-0.0581106	-0.137677	0.307262	-0.145055	-0.165529	-0.548897	0.0587968	-0.164129	-0.0372668	-0.0886579	-0.0834221	0.0577527	0.206667	0.0366667	0.0144313	-0.1	0.0245651	-0.123321	0.0299326	-0.141859	0.054	0.124
A930033H14Rik	0.137502	0.387097	0.369739	-0.107549	-0.722846	-0.6568	0.071224	0.23834	0.184756	-0.287778																				-0.128563	-0.168368	-0.157	-0.156
AA386476	0.341229	0.677419		-0.781531	-0.313846	0.636824	-0.723331	-0.149307	0.18	-0.12	0.0517028	-0.302472		0.130249	-0.0944906	-0.158396	-0.390106	0.0870291	-0.078211	0.0690159	0.0708802		-0.0101064			0.0582242				-0.537204	-0.73522
AA415398	0.11236	0.870968	-0.35694	0.136007	0.519778	-0.460071	-0.398918	0.04761	-0.01	-0.37	0.122874	0.0189731	-0.245449	0.0684663	-0.28683	0.139933	0.056068	0.13888	-0.0392828	-0.117653	0.0605427	0.403821	0.0653837			0.111199	0.116667			-0.0694866	0.114284	0.035	0.098
AA467197	0.245914	0.870968	0.941486	-0.711968	3.89401	-2.20945	0.161751	7.06453	0.215	-0.185	0.032722	0.00288566	0.128422	0.454346	-0.0420303	-0.119121	0.828335	0.0221786	0.0464402	0.154237	0.170712	0.0068622	-0.0471506			1.79401	0.746667			0.472321	0.302891	0.61	0.465
AA792892	0.176805	0.0967742											0.077488																			0.066	0.447
AA986860	0.316582	0.870968	-0.55501	-0.264595	0.194322	-0.369986	0.367653	-0.239719	0.160017	-0.128219	0.0455116	-0.527342	-0.171195	0.230127	-0.456754	0.0316709	0.153357	0.41109	-0.291078	-0.0545833	-0.326834	-0.508344	0.123968			-0.7819	-0.783333			-0.565336	-0.400388	-0.032	0.322
Aaas	2.39883	1	-0.421898	-0.425376	0.389613	0.125733	0.225245	-0.213395	-0.605	-1.46	-0.374098	-0.275267	0.0926168	0.089313	0.387444	0.145925	0.177085	-0.158319	-0.278495	-0.195651	-0.204818	-0.59646	-0.0980759	0.11	0.296667	-0.177012	0.0966667	-0.742178	-1.29346	0.0327864	-0.598258	-0.041	0.071
Aacs	1.31552	1	-0.296591	-0.33079	0.184414	-0.55626	0.386733	-0.452881	0.156411	-0.372593	-0.391672	-0.112558	-0.666724	-0.101595	-0.190673	-0.181817	0.394676	-0.0702127	-0.65575	-0.0664411	-0.0125743	-0.235221	0.348632	-0.106667	-0.286667	-0.324572	0.0333333	-0.16481	0.150498	0.0114	-0.221132	-0.037	-0.69
Aadac	0.340218	1	0.110728	1.14543	-0.0740006	-0.314109	1.07477	-0.974567	0.275	-0.11	0.0376156	-0.0508487	0.0617946	0.0780325	1.4408	0.00723443	0.842401	-0.0626979	0.0696261	-0.154084	-0.0114862	-0.0653786	0.180301	-0.26	-0.186667	0.0188463	-0.163333	0.0554463	0.0363976	-0.0834596	-0.0993609	-0.16	-0.41
Aadacl2	0.647621	0.516129									0.0518151	-0.0792104		0.0823117	-2.18144	-0.062847	0.000222903	0.0698159	-0.031544	0.105428	0.0346614	-0.0912312	-0.0230473			-0.126763	-0.0133333					-0.202	0.309
Aadacl3		0.0645161																														0.198	-0.1145
Aadat	0.133576	1	-0.124953	1.37851	1.99366	-0.228106	-0.125531	0.17426	0.44	-0.07	-0.634357	-0.273594	-0.0451578	-0.00938771	-0.187104	-0.17626	-0.291191	-0.337909	0.161408	-0.258676	-0.409173	-0.000690351	0.0695118	-0.08	0.0433333	0.18247	0.22	0.182934	0.120984	0.0392261	-0.0746205	-0.716	-0.663
Aaed1	1.25656	1	0.4032	-0.281376	0.0725673	0.276952	0.453101	0.296474	0.43422	2.15395	0.16545	0.887377	0.506604	0.0440692	-0.167347	0.155771	0.0619488	-0.201975	-0.00193788	0.350333	0.365247	0.668272	-0.227759	-0.0166667	0.0466667	-0.213211	0.00666667	0.199059	0.137202	-0.0598197	0.321743	0.2395	0.1145
Aagab	0.489235	1	-0.822974	-0.371621	-0.408261	-0.261666	-0.372192	0.119474	-0.838918	-0.0364111	-0.351622	-0.013927	-0.156562	-0.0405576	-0.0993235	0.046586	0.0515362	-0.238355	-0.0196598	-0.123107	-0.0528027	-0.0297351	-0.0564234	-0.0233333	0.0566667	-0.0797076	0.0366667	-0.189522	-0.287143	-0.175677	-0.011058	-0.046	0.307
Aak1	0.866994	1	-0.712734	-0.728428	-0.339914	0.654649	0.228761	-0.787512	0.0214171	-0.201956	-0.0135128	0.136021	-0.133237	0.0632021	-0.0593823	-0.0570531	-0.150795	0.0918484	0.168117	-0.0464072	-0.271738	0.282602	0.080457	0.0766667	0.0233333	0.0541072	-0.143333	0.0234758	-0.219976	0.0271368	-0.0756905	-0.118	-0.02425
Aamdc	0.311109	1	-0.392473	-0.322939	-0.341876	-0.087594	0.556074	-0.246863	-1.21	-0.91	-0.058791	0.446329	-0.534512	0.159712	0.0208766	0.432669	0.0561597	0.16529	0.0957881	-0.256022	0.0818999	-0.0606777	0.426951	0.0166667	-0.423333	0.290412	0.14	0.0242798	0.0171125	-0.0047698	0.682251	0.155	0.4455
Aamp	3.68459	1	-0.120138	-0.25277	-0.408659	-0.373241	0.105022	-0.081005	-0.99	-2.5	0.0245288	0.181856	0.190627	0.0993617	0.142717	0.0170815	0.244736	-0.229574	-0.274053	0.0545536	0.15978	-0.153769	0.139588	-0.133333	-0.136667	0.109208	-0.0666667	0.252919	0.338179	-0.0764146	0.111815	0.105	-0.237
Aanat	0.148225	1	0.588713	-1.34104	0.0962153	1.37954	2.07696	0.160065	0.165	-0.625	0.157226	-0.35945	0.0234085	0.178517	-0.267488	-0.0875981	-0.464585	0.216948	-0.218799	0.0269119	0.252929	-0.0409499	0.0582881	-0.0633333	-0.17	0.00914393	0.163333	0.0798024	-0.0833148	-0.134982	-0.172669	0.016	-0.1275
Aar2	0.674924	1	-0.425726	0.382655	-0.357007	0.208889	0.518988	-0.433572	-0.152719	-0.881742	-0.0543548	-0.0548499	0.0365772	0.0250982	-0.202735	-0.019605	0.0430876	0.0567877	0.0453391	0.0501048	0.128704	0.00233132	0.184174	0.0633333	0.0433333	0.0219975	-0.09	-0.109814	0.0136496	0.0238394	0.0344147	0.118	-0.078
Aard	0.209712	1	0.424448	-0.308122	-2.90689	-0.605721	-0.796467	0.399468	0.465	0.405	0.141131	-0.138604	-0.0230177	0.191833	-0.182172	-0.0928694	-0.0468503	0.233643	0.0110482	0.307118	-0.027721	0.115252	0.0411635	0.193333	-0.0233333	0.0445859	-0.00333333	0.0631878	0.23561	-0.167631	0.06902	-0.014	0.053
Aars	2.90849	1	-0.134758	-0.450917	0.185099	-0.378807	0.247037	-0.385386	-0.211146	-0.798715	-0.186369	-0.153327	0.4445	0.0164335	0.16648	0.107338	0.0906728	-0.141386	0.0567523	-0.115852	-0.15463	-0.431261	-0.579535	0.0266667	0.123333	0.351119	0.183333	-0.466422	-0.259934	0.323172	0.0269418	0.143	-0.2435
Aars2	0.436981	0.870968	-0.315435	-0.211545	0.277172	-0.899168	0.971869	-0.0887767	0.44	-0.415	0.216608	0.432246	0.195935	0.186166	-0.0221775	-0.0404721	-0.0569247	0.0212396	0.0708081	0.207001	0.216043	-0.178754	0.00120197			-0.0740861	0.2			0.0772946	0.0343492	-0.12	0.1
Aarsd1	1.07871	1	-0.862983	-0.41575	-0.0468532	-0.906148	0.680527	-0.379317	0.875	-1.2	-0.417799	-0.403345	0.058614	0.0680588	0.12611	0.166054	0.177968	-0.14701	-0.437304	-0.299865	-0.0788336	-0.356652	-0.161319	-0.0633333	0.06	-0.301626	-0.236667	-0.483997	-0.577653	-0.649032	-1.05004	-0.048	0.081
Aasdh	0.356372	0.870968	-0.693708	-0.382107	-0.0433282	0.251182	-0.0805378	-1.85394	-0.670007	0.170716	0.170312	0.2558	-0.24567	0.139108	-0.0657986	-0.223931	0.0389041	-0.00735532	-0.136593	-0.115451	-0.0544408	-0.0421998	-0.0562372			-0.214807	0.196667			0.0146183	0.319388	0.0295	-0.025
Aasdhppt	1.29972	0.870968	-0.632801	-0.318704	0.319782	-0.0970485	0.510292	-1.2544	-2.23535	-0.222287	-0.026217	-0.229075	0.00271038	-0.177065	-0.257973	-0.0728596	0.12502	0.064565	-0.0888016	-0.221812	-0.169277	-0.250296	-0.510182			0.333737	0.143333			-0.643971	-0.854923	-0.1565	-0.484
Aass	0.0977054	1	0.131038	-0.180154	-0.469485	1.24101	-5.14568	-2.50537	-0.465	-0.145	-0.202675	-0.195104	0.0503317	0.0823318	0.0476702	-0.286528	-0.0568262	0.177076	-0.0261763	-0.240453	-0.643243	-0.00330638	0.205924	0.02	-0.0666667	-0.0187167	-0.516667	-0.260085	-0.146065	-0.232235	0.114453	-0.038	0.444
Aatf	1.40166	1	-0.367319	-0.0683569	0.523777	0.339283	0.468751	-0.122668	-1.075	0.395	0.259475	0.00520342	0.544298	-0.057608	0.0601522	-0.0744061	0.0436311	-0.0139016	-0.0752955	-0.205098	-0.106822	-0.0833808	-0.717921	0.21	0.0833333	0.204971	0.25	-0.243616	-0.163978	-0.439694	-0.69541	-0.207	-0.874
Aatk	0.244224	1	0.561089	-0.882643	-0.0507881	-0.881621	0.672286	-0.243062	0.43	-0.03	0.0663929	-0.272838	-0.0974901	0.0326138	-0.130278	-0.327126	-0.561198	0.293443	0.0501724	0.0316854	0.220983	0.0125347	-0.00898958	0.156667	0.336667	0.03758	0.23	0.176772	0.0896724	-0.0442092	-0.108272	0.181	0.152
AB010352	0.123495	0.451613									0.424506	0.313024		-0.488942	-0.158589	0.38203	0.268725	-0.461777	-0.428521	-0.133086	-0.417924	0.420149	0.27428			-0.203219	0.373333
AB041806	0.123406	0.709677		0.347427	-1.18161	-0.87092	0.683104	-0.343128	0.325	-0.135	0.0314867	-0.333515		0.266734	-0.0103281	-0.140864	-0.362387	0.134931	-0.0771365	0.00937855	0.0759002		0.0472611			0.0928051	0.133333			-0.0859771	0.0844955
AB124611	0.11393	0.870968	0.452041	0.331039	1.19855	-3.72489	0.584963	2.45728	0.4	0.02	0.00255947	0.010142	0.0217558	-0.0347315	0.0242704	-0.239327	-0.393195	0.229659	0.0341395	0.048404	0.2051	-0.0344921	0.0429859			0.0464713	-0.23			0.0472856	0.396012	-0.1965	-0.1415
Abat	0.289669	1	0.29691	-0.0995357	0.241008	0.765535	0.514573	0.609245	-0.005	0.29	0.0836652	-0.195395	-0.00622095	0.0944114	0.549674	-0.0492997	0.0465455	-0.0426031	-0.174894	0.0390678	-0.0174407	1.61977	-0.033287	0.07	-0.01	-0.1254	0.1	0.123545	0.00238722	-0.24891	-0.294615	-0.229	-0.7965
Abca1	0.417777	1	0.159737	-0.494575	-1.12213	-0.441614	-1.01987	0.565082	0.31536	0.119922	-0.2298	0.00112452	0.0267542	0.634194	0.548522	0.366673	0.295771	0.00781024	0.203181	-0.0887197	-0.150784	0.124203	0.00126795	0.31	-0.116667	-0.322953	-1.61333	-0.0220625	-0.0339111	-0.0221399	4.33607	-0.38	0.182
Abca12	0.901411	0.870968	0.225111	0.0421695	0.269987	-0.318561	0.0144415	-0.0128133	0.905	0.175	-0.0556105	-0.0893006	-0.0443099	0.0983568	-1.25906	-0.132489	-0.359296	0.112693	0.099272	-0.0090232	0.0547264	-0.0434903	-0.668833			-0.137466	-0.01			-0.143344	-0.126426	-0.055	0.446
Abca13	0.0469231	0.870968	0.200526	-0.149137	-2.81969	0.489923	1.085	0.112489	0.286247	-0.246071	-0.132913	-0.213521	-0.0134988	0.109998	-0.0913741	-0.0242926	-0.11452	0.078442	0.0937583	0.0617885	-0.0377496	-0.00599618	-0.0393039			-0.0788655	0.05			-0.0952062	-0.123141	-0.8635	-0.386
Abca14	0.0678021	0.870968	-0.0175311	-0.255702	-0.682518	1.59826	2.08873	-0.233472	0.075	-0.355	0.0774316	-0.200849	0.137856	-0.0482132	-0.222845	-0.0905619	-0.0598161	0.107141	-0.159065	0.0757565	-0.116296	0.00532003	0.0306014			-0.0573405	0.0466667			-0.19295	-0.116469	-0.3485	-0.61
Abca15	0.0605091	0.580645	0.26506								0.0399148	-0.0885661	-0.0311587	0.274932	-0.0009026	-0.191821	-0.209401	0.0738944	-0.0454608	0.0333289	0.177571	0.00490495	0.00211485			0.0871694	-0.106667					0.0865	0.0215
Abca16	0.0312015	0.870968	0.029441	0.0524674	0.359896	0.106915	0.847997	-0.345667	0.375	-0.31	-0.182687	0.101415	-0.0446627	0.0726466	-0.200338	-0.141707	0.0581974	-0.103425	-0.0822974	0.0863379	0.122612	-0.0690356	0.0180387			-0.0213778	-0.0633333			-0.0207959	0.0518621	0.086	0.62
Abca17	0.107364	0.548387									0.0632029	-0.122714	0.0443018	0.169083	-0.194387	-0.168345	0.00567403	-0.0137289	-0.104628	-0.00381966	0.0750971	-0.020024	-0.0471862			-0.0347639	0.00333333					0.125	-0.313
Abca2	0.59912	1	-0.493668	1.24507	-0.876005	-2.38886	-1.22363	-0.311783	0.635	-0.77	0.298098	0.560363	-0.236136	-0.439504	-0.508018	-0.497548	-0.163123	0.39304	0.352655	-0.196016	-0.318178	1.16417	0.39791	0.12	-0.26	-0.193657	-0.243333	0.203835	-0.0230195	-0.373862	0.381884	0.134	0.0745
Abca3	1.01786	1	-0.755947	0.679525	-0.577182	-0.516249	0.145266	-0.904163	0.192428	-0.776332	-0.0665113	0.257427	-0.423971	-0.271857	-0.379608	-0.440444	-0.316639	0.197106	0.158273	-0.239283	-0.329697	0.101943	0.244085	-0.04	-0.156667	-0.36254	-0.176667	0.0411802	-0.553396	-0.755942	0.0627349	0.107	-0.813
Abca4	0.197926	1	0.247202	0.819428	1.14975	-4.08746	0.540568	-0.161418	0.715	-0.395	-0.130557	-0.414723	0.151513	0.0725888	-0.121846	-0.0858285	-0.546991	0.0656001	0.142024	-0.142495	0.0699126	0.0249957	-0.0627361	0.106667	0.0266667	-0.0924836	0.0433333	-0.885138	-0.814796	-0.430898	-0.115454	-0.4095	-0.718
Abca5	0.935282	0.870968	-0.472645	-1.28728	-0.169018	-1.13634	0.109129	-0.241563	0.0375346	0.0852555	-0.0679904	0.225586	0.188482	-0.0530947	-0.778784	-0.349834	-1.19194	0.00779649	-0.112192	0.244258	0.156595	0.117543	-0.024615			0.0643006	0.51			-0.204456	0.327211	-0.964	-0.033
Abca6	0.0495184	0.870968	-0.0975588	-0.162553	-3.63227	-0.600393	0.0931094	0.128398	0.67	0.1	-0.404752	-0.430328	0.0220175	-0.138812	-0.103852	0.00559926	-0.0382313	-0.20103	-0.0489173	-0.0925694	-0.0710313	0.0126964	-0.0962411			0.0755669	-0.0633333			0.005023	-0.191274	-1.575	-0.046
Abca7	0.826201	1	-0.615253	-0.307076	-0.197295	-0.831063	0.0874475	0.128162	0.67	-0.875	-0.156654	0.264681	-0.0645724	-0.00623656	-0.232775	-0.194907	-0.174169	-0.167748	-0.0557664	-0.134619	-0.0861964	0.190662	-0.0700698	0.0766667	0.113333	-0.647153	0.0566667	0.141809	0.022866	-0.334594	0.821631	-0.074	-0.444
Abca8a	0.063855	1	-0.0140079	-0.847997	-0.06286	0.192645	1.29459	2.40488	0.725	-0.12	-0.00214272	-0.00201998	-0.0393856	-0.0154634	0.0158445	0.0763988	0.0213859	0.0139323	-0.027182	-0.11187	0.0548264	0.134237	0.0765757	0.0266667	-0.0766667	0.0178552	-0.483333	-0.0192488	-0.0352676	-0.0716903	-0.16717	-0.061	0.072
Abca8b	0.0681467	1	0.0349473	-0.184425	-0.65936	-0.439571	-1	-1.04384	-0.105	-0.42	0.00907462	-0.142241	-0.110425	0.0611294	-0.0375722	-0.172376	-0.14642	0.389982	0.0330119	-0.319994	-0.164557	0.0197687	-0.174518	0.136667	-0.04	-0.106951	-1.54667	-0.192768	-0.219783	0.145054	-0.0684776	-0.474	-0.254
Abca9	0.0698925	0.870968	0.217428	0.655635	-0.677083	0.760323	1.96301	2.02712	0.453455	-0.0534856	-0.196902	-0.179539	0.0135754	-0.0167782	-0.159209	-0.220741	-0.279427	0.0080423	-0.0419981	-0.0303559	0.162317	0.000186395	-0.0274919			-0.00990639	-0.383333			0.119081	0.0844653	-0.401	-0.799
Abcb10	0.524528	1	-0.371048	-0.101912	0.327362	0.596043	0.452257	-0.47177	0.103567	0.0696821	-0.125778	0.2503	-0.127275	-0.24996	0.00646326	-0.0940734	0.210812	0.066843	0.0800856	0.0416845	0.0555504	-0.387015	0.346083	0.113333	0.0966667	-0.0367518	-0.0766667	0.0976855	0.244338	-0.455707	-0.601448	0.016	-0.184
Abcb11	0.0741801	1	0.135193	1.29177	-0.263034	0.87245	0.13952	0.445267	0.55	0.24	0.0282616	-0.163689	-0.0417744	0.0913203	-0.34506	-0.200171	-0.342141	-0.0181012	-0.105425	0.249502	0.17506	0.0281487	-0.075938	0.126667	-0.243333	-0.203405	-0.07	-0.0479446	-0.0175432	-0.00137353	-0.15983	1.302	1.327
Abcb1a	0.626849	1	-0.824953	3.12928	1.04555	1.89187	1.90425	4.15141	-1.52093	0.0666959	-0.891981	-0.549223	-0.0347671	0.133299	-0.228462	0.170354	-0.156192	0.044167	-0.428618	0.00882072	-0.0970723	-0.574558	0.111833	-0.14	-0.246667	0.114223	0.516667	0.716567	1.19096	-0.575358	-1.33079	0.128	0.002
Abcb1b	0.923909	1	-0.405493	-1.27776	0.43897	-0.668018	0.0903283	3.40998	-0.027109	-0.0973002	0.398395	0.966165	-0.697028	0.0922926	0.29583	0.571096	0.336188	-0.551739	-1.29059	0.0106991	0.0280759	-0.874325	0.0182713	0.0933333	-0.276667	0.0950477	0.553333	0.101531	0.390424	1.23416	0.540615	-0.296	-0.887
Abcb4	0.215416	1	0.0383501	-0.480962	-0.463947	0.440421	0.308765	0.531143	0.675	-0.56	0.273665	-0.113563	-0.267063	-0.0971047	-0.0941991	-0.122597	-0.405368	-0.0737432	-0.251236	0.107565	0.0506975	-0.0595151	0.0921582	0.0766667	0.0166667	0.177321	-0.193333	0.187388	0.0877367	0.10162	-0.0688658	0.0245	-0.1545
Abcb5	0.0497817	0.516129									-0.0950294	-0.067748		0.176406	0.0446815	-0.0795846	-0.196459	0.0430186	0.0196445	0.0619729	-0.0428238	0.303515	0.0441021			0.0223364	-0.0466667					-0.493333	-0.329333
Abcb6	0.816172	1	-0.964497	-0.391248	-0.609784	-0.783738	0.425005	-0.798802	0.25	-1.76	-0.57645	-0.109936	-0.246022	0.0133463	0.122493	-0.163099	0.244721	0.119097	-0.0517634	-0.00554481	0.0653075	0.142402	0.0313228	-0.193333	-0.0833333	-0.0977067	0.156667	-0.0719002	0.190441	-0.186155	0.0194101	-0.127	0.28
Abcb7	1.39858	0.935484		-0.529497	-0.300131	-0.819686	0.285137	-1.84897	-0.234011	1.02554	-0.241334	-0.134188		-0.0310308	0.298941	-0.171241	0.282778	-0.186439	-0.365113	-0.068116	-0.165577	-0.0429371	0.0166538	0.0633333	0.166667	-0.25255	-0.38	-0.270766	0.219167	-0.325598	-0.196728	-0.109	-0.4725
Abcb8	0.746747	1	-0.458511	-0.210792	-0.210206	-0.725309	0.664267	-0.13528	-0.233274	-1.12491	-0.0287488	0.153088	0.104333	0.00154737	0.168999	0.0816251	0.277122	-0.0186456	-0.210865	0.0386943	0.0564661	0.0146505	-0.208659	-0.04	-0.17	-0.333537	-0.09	-0.0724961	-0.242995	-0.251932	0.225109	-0.304667	-0.737333
Abcb9	0.308585	1	0.189653	0.753983	0.197662	-0.183764	2.10838	-0.0202456	1.03806	-0.141335	0.0549691	-0.337948	-0.150483	0.273592	-0.0170452	-0.10589	-0.126456	-0.0112621	0.19396	0.0238428	0.00875388	-0.0772218	-0.0883139	0.153333	0.0966667	-0.240639	-0.0133333	0	0.000321561	0.0670692	-0.0926579	-0.093	0.356
Abcc1	2.34725	1	0.296561	-0.176139	0.265466	-0.0676528	0.856107	0.240298	-0.105516	0.211094	0.364611	0.0733561	-0.0670983	0.199324	0.351895	-0.107078	0.309853	-0.452453	-0.60462	-0.288408	-0.266884	-0.109689	-0.562211	-0.163333	-0.24	-0.267263	0.213333	-0.194249	-0.460413	0.636857	0.778893	-0.299	-0.411
Abcc10	0.356631	1	-0.161401	-1.7417	-0.48947	0.435859	-0.970102	-0.00664229	-0.138335	-0.633444	-0.0207476	-0.294784	-0.274016	0.0962981	-0.183391	-0.384201	-0.246882	0.00885485	-0.0118323	-0.295881	-0.174589	0.197686	0.00483751	-0.196667	0.406667	-0.075383	0.0766667	-0.00556226	-0.0693145	-0.0584115	0.174976	0.043	-0.187
Abcc12	0.0974271	0.870968	0.435826	-0.220636	-0.498529	0.757529	0.721699	0.155499	0.789321	0.0839907	0.175126	-0.0412119	0.0857629	0.0592593	-0.0712247	-0.197008	-0.254874	0.297307	-0.0784257	0.181278	0.150941	0.0431354	0.0516517			-0.0457016	0.01			0.104442	0.0733537	-0.162667	0.354333
Abcc2	0.315496	1	-0.171532	-0.495957	-2.89812	-0.89439	1.29956	-0.243913	0.185	0.325	-2.21112	-0.571594	-0.029074	0.16797	-0.076332	-0.213871	-0.0714959	-0.0728897	0.242347	-0.9279	-1.11533	0.354526	0.523938	0.22	0.0766667	-0.0814393	-0.0166667	-0.0559227	-0.160756	-0.236851	0.339409	0.542	0.638
Abcc3	1.04114	1	-2.00416	-0.624491	-0.35973	-4.10434	0.0288643	1.59225	0.04	-0.63	-0.892053	-0.298599	-1.52871	-0.990479	-0.921385	-0.580861	-0.795357	-0.276418	-0.378987	-0.764129	-0.683105	0.103003	-0.100773	0.17	0.336667	-0.0278133	-1.68667	-0.899459	-0.946119	-1.31277	1.35015	0.727	0.708
Abcc4	2.04986	0.806452		-0.33516	0.0894707	0.23094	0.121554	3.99977	-0.295	1.555	0.0444425	-0.444408		0.0272823	-0.0919467	-0.298083	0.023732	0.0489274	0.178896	-0.621512	-0.739174	0.179565	-0.0798359			0.443249	0.43			-0.0126987	-0.213654	0.075	-0.318
Abcc5	0.918018	1	-0.678228	-0.0174533	-0.0912663	-0.335908	-0.103237	0.137513	0.461492	0.143346	-0.147309	-0.317405	-0.0675465	-0.0216678	0.0273556	-0.169079	-0.123634	0.0608165	0.139139	-0.401754	-0.44762	-0.10526	0.388738	-0.01	0.03	0.180987	0.363333	0.0106572	0.177894	-0.0602677	0.525282	-0.14425	0.255
Abcc6	0.243015	1	0.359883	0.115477	1.49643	1.44626	-2.84435	0.167305	0.315	-0.52	-0.0575298	-0.552646	-0.337081	0.180566	0.186996	-0.0772405	-0.00548682	0.116348	-0.0275833	0.0161427	-0.0459754	0.065571	0.193843	0.393333	0.283333	-0.0839499	-0.0133333	0.228498	0.072369	0.116597	-0.327234	-0.121	-0.297
Abcc8	0.276138	0.967742		-0.758924	0.414467	-0.401741	3.08657	0.0451077	0.458853	-0.250846	-0.0600994	-0.304015	-0.138921	0.0486213	-0.0405694	0.00316348	-0.318234	0.167383	-0.0896026	-0.0393288	0.099527	0.0641306	0.0383708	-0.00333333	0.246667	0.0243139	0.21	-0.00918223	0.0412231	0.139717	-0.0696637	0.2675	0.157
Abcc9	0.107629	1	0.152741	-0.781135	0.389925	-1.16966	0.801387	2.59	0.293372	-0.274443	0.00349534	-0.207484	0.0305547	0.106061	0.0636986	-0.00261	-0.258035	0.015555	0.0617114	-0.0735261	-0.0288318	0.224385	-0.0895875	-0.0233333	0.0433333	0.0630753	-0.03	0.0827978	-0.181611	-0.085471	-0.0770854	-0.069	-0.425
Abcd1	0.403779	1	-1.12146	-0.609286	-0.274913	-1.02565	0.232113	0.121017	0.68	-0.945	-0.421316	0.428554	-0.957317	-0.111598	-0.0248559	-0.119223	-0.0372301	-0.173545	-0.207472	-0.0498163	-0.11135	0.875623	0.628728	0.123333	0.346667	-0.354637	-0.98	-0.0972736	-0.117403	0.0298188	0.421393	0.781	0.2485
Abcd2	0.153288	1	-0.203239	0.527081	0.253358	2.85724	1.66705	0.839073	0.343778	0.0957423	0.0795694	-0.193123	0.0545424	0.0624676	0.0422184	0.117779	-0.152283	0.0809403	-0.0271694	-0.0103542	0.187513	-0.0979208	-0.0428982	0.00333333	-0.293333	-0.0807617	-0.34	-0.140639	-0.0548966	0.025373	-0.0917997	0.469	-0.152
Abcd3	1.80318	0.967742	-1.4156	0.0761933	-0.113241	-0.676141	0.804364	-0.86852	-0.339754	0.557355	-0.859911	-0.883509	-0.923701	-0.167367	-0.161133	-0.080707	0.205911	0.158208	0.365474	-0.347443	-0.41579		-0.0302166	0.01	0.173333	0.356809	-0.31	-0.52251	-0.301284	-0.616094	-0.40112	-0.033	0.523
Abcd4	0.540097	1	-0.250197	0.251942	0.333995	-0.140986	0.231638	0.613453	0.134189	0.0670582	0.0210765	0.196365	0.122403	0.0984227	-0.127007	-0.168146	-0.158388	-0.0832714	-0.268527	0.209992	0.199634	0.0082364	-0.130601	-0.233333	0.04	-0.378539	0.25	0.189233	-0.0192425	0.00408567	0.499016	0.171	0.767
Abce1	3.96315	1	-0.162979	-0.661371	0.0311669	-0.269046	0.529518	0.331814	-0.767632	0.97786	-0.138972	-0.25409	0.0848664	-0.088647	0.134728	0.00223069	0.26145	-0.0253784	-0.0603526	-0.077259	-0.148886	-0.209153	-0.584441	-0.02	-0.11	0.147528	0.23	-0.448261	-0.284	0.145395	-0.897891	0.009	-0.672
Abcf1	1.5604	1	-0.257942	-0.0853298	0.566455	-0.307578	0.444469	-0.131083	-0.58896	-0.286521	-0.156475	-0.0165438	0.277854	0.0645525	0.0671188	0.10852	-0.0183356	-0.268937	-0.151249	-0.0514039	-0.0300441	-0.365807	0.0732875	0.01	0.17	-0.245187	-0.0533333	0.00266486	-0.194266	-0.0175773	-0.0322775	0.1545	0.03
Abcf2	2.14489	1	-0.352802	-0.64473	0.322267	-0.431862	0.646457	-0.279711	0.0211381	0.167513	-0.064086	-0.122888	0.532267	-0.276631	0.144316	-0.0328694	0.227514	-0.185711	-0.151214	0.00596979	-0.0163667	-0.545559	-0.536684	0.39	-0.0966667	0.0988038	0.01	-0.284023	-0.393445	0.0559249	-0.209912	0.027	-0.58
Abcf3	0.816086	1	-0.646578	-0.407356	-0.1886	-0.620504	-0.0484339	-0.752552	0.664302	-0.328885	-0.189596	-0.0404916	-0.187259	-0.158155	-0.15729	0.011495	0.408046	-0.0870909	-0.0484991	0.205542	0.189025	-0.0605154	0.113363	0.0266667	-0.08	0.0829166	-0.153333	-0.00990833	0.02007	0.0939174	0.363007	0.133	0.048
Abcg1	0.452891	1	0.598446	0.000205084	-0.222185	-0.990543	0.52286	2.07858	0.341464	0.052896	0.0955493	-0.248782	0.031457	0.348989	0.0203135	0.140754	0.575753	0.09404	0.0723827	0.234331	0.104021	0.0481686	0.031087	0.04	-0.0166667	0.76284	0.12	0.0170866	-0.0372458	-0.229061	-0.121429	0.091	2.562
Abcg2	0.715379	1	-1.16193	-0.871888	0.282255	-0.581557	0.560386	-2.34138	-2.79	0.035	0.295396	0.115813	0.0520811	0.080339	0.758241	0.542159	0.449465	-0.0122838	-0.496109	-0.316825	-0.212341	-0.107734	0.148672	-0.0633333	-0.34	1.29513	-0.106667	-0.0667699	-0.174139	-0.685318	-1.50271	-1.274	-0.933
Abcg3	0.125153	1	0.00274612	1.58005	0.213152	-0.0215332	-0.0373817	2.02242	0.429993	-0.332857	0.00828814	-0.108622	-0.0972531	-0.199651	0.0369792	0.000320838	-0.200261	-0.10395	-0.134196	0.193702	0.157692	-0.0585496	-0.0253784	0.46	0.0533333	0.0778415	0.123333	0.0127411	0.0270525	0.0874817	-0.0194375	-0.043	-0.076
Abcg4	0.269286	1	0.174405	-0.152418	0.170509	-0.370472	0.476022	-0.466832	0.546882	-0.309408	0.0228637	-0.00137473	0.0965353	0.275118	-0.446758	0.222971	-0.360585	-0.039136	-0.0545249	0.119056	0.112406	-0.0602876	-0.0220196	-0.0266667	-0.13	-0.0914587	0.11	-0.0962177	-0.0861528	-0.0400535	0.0101071	-0.0793333	-0.241
Abcg5	0.123152	1	0.257351	1.58496	-3.65025	-1.02714	2.0614	-0.0309167	0.055	-0.29	0.167408	-0.260169	-1.89988	0.0972795	-0.140042	-0.202422	-0.265082	0.27657	-0.0279245	-0.113584	0.0735745	-0.105529	0.0351684	-0.136667	-0.21	-0.0313186	0.04	0.249776	0.00686063	0.121408	-0.204184	0.087	0.505
Abcg8	0.204972	1	0.249341	0.379825	0.151644	0.603311	0.102061	-0.0333383	0.505	-1.045	-0.126936	-0.287893	-1.49498	-0.0774136	-0.0620781	0.00459947	-0.551478	0.0393004	-0.109609	-0.267381	0.0346471	-0.0305718	0.030266	0.0733333	-0.0566667	-0.0897197	0.333333	0.108119	0.0105629	0.0498617	-0.0004704	1.343	1.219
Abhd1	0.714359	1	-0.219914	-0.141277	-0.428797	-0.159931	0.375932	-1.11462	0.435	-0.56	-0.258791	0.7179	-0.0373634	-0.346627	-0.511591	-0.138282	-0.0222459	-0.233311	-0.104912	0.316911	0.180865	0.397365	-0.0260945	0.266667	-0.01	-0.199863	-0.00333333	0.137751	-0.156936	0.0490088	0.275601	0.334	0.429
Abhd10	0.477904	1	-1.02759	-0.403149	-0.295601	-0.1005	-0.00106899	-0.642991	-0.618178	0.0455215	-0.044382	-0.113472	-0.029627	-0.256796	0.00699409	0.178168	0.0851721	0.137782	-0.0261495	-0.227707	-0.295005	-0.466286	-0.333572	0.0433333	0.12	0.242874	0.0233333	-0.80655	-0.958046	-0.0485286	-0.203457	0.161	0.2865
Abhd11	1.34194	0.870968	-0.328663	-0.532587	0.32608	-0.142125	0.0741938	-1.23951	0.285	-1.13	0.00252978	0.00355385	0.0222006	-0.0102408	-0.129852	-0.0249782	-0.0739568	-0.230792	0.0368554	-0.135938	-0.0499388	-0.130132	-0.101816			-0.0923894	-0.263333			0.0465479	-0.373908	-0.112	-0.2915
Abhd12	1.6167	1	-0.637386	-0.123462	0.124586	-0.174673	0.478728	-0.0146193	-0.0100151	-0.429827	0.263973	0.686201	0.242776	0.0908189	-0.0594576	0.0666384	0.422226	-0.345315	-0.0943923	0.0884882	-0.0204754	-0.0237273	-0.128469	-0.133333	-0.0233333	0.291547	-0.166667	0.00590409	0.337183	-0.743528	-0.00844476	0.289	0.223
Abhd12b	0.137189	0.451613									0.0509552	-0.0192119		0.285048	-0.338351	-0.247828	0.985633	-0.0242328	0.0518536	-0.0665587	0.154105		-0.0191343			0.0194349						0.084	0.162
Abhd13	1.11528	0.83871	-0.0327451	-0.229525	-0.284278	-0.19818	0.668201	-1.21209	-1.28653	-0.0536371	0.0289154	0.113518		-0.139225	-0.195906	-0.233192	0.0622693	0.101003	0.29341	0.0575368	-0.12889	-0.146125	0.049897			-0.0698108	-0.0133333			0.00492741	0.0588956	0.012	-0.453
Abhd14a	0.773275	1	-0.366726	-0.23351	-0.0195037	0.127517	0.326861	-0.0400763	1.33695	-0.359664	-0.0294696	0.40432	0.198223	-0.168983	-0.142189	0.0577089	-0.145391	-0.0766314	-0.0126532	0.201553	0.143214	-0.00335091	-0.00765795	-0.00666667	0.0733333	0.20391	0.22	-0.0904993	-0.236545	-0.138427	-0.104955	-0.153	-0.692
Abhd14b	1.06345	0.967742		-0.891437	-1.30642	-1.06369	-0.798748	-1.27705	1.9	0.605	-0.568467	0.222913	-0.463199	-0.164128	0.0753562	0.200572	0.228981	-0.477534	-0.583849	0.057727	-0.338475	0.353796	0.291973	0.0566667	0.0333333	-0.191533	-0.856667	-0.125503	0.267007	-0.441911	1.06544	-0.212	-0.155
Abhd15	0.199192	1	0.334608	-0.658409	-0.7526	-0.507582	0.573047	0.139844	0.210363	-0.336275	-0.128694	-0.311627	0.0590392	0.084395	-0.00249602	-0.171551	-0.205698	-0.0598769	-0.114461	0.0347142	0.0821753	0.26761	0.0316249	-0.0933333	0.0766667	0.0457442	0.00333333	0.00289042	0.0344726	-0.0926552	-0.127067	-0.0786667	-0.122
Abhd16a	1.05863	0.935484	-0.359261	-0.0310759	-0.397248	-0.752251	0.64515	-0.137313	0.825078	-0.56819	0.0224001	0.183362	-0.558737	-0.158888	-0.321379	-0.244878	0.00359096	0.0997868	0.0228182	0.0818294	0.100416	-0.0308346	0.10781	-0.1	-0.0966667	-0.101767	0.03			0.0234099	0.460418	0.012	0.56
Abhd16b	0.0871249	0.83871	-0.107324	0.167842	-1.0638	-0.135777	-0.605721	-0.279578	0.335	0.21	-0.114908	-0.0520599		0.0686104	-0.0609893	0.160035	0.160657	-0.10947	0.134855	-0.0627233	-0.194824	-0.0460835	-0.0773528			-0.14505	-0.136667			-0.0725152	-0.121571	0.624	0.393
Abhd17a	1.46476	1	0.217201	-0.255399	-0.0837766	-0.296964	0.490888	0.236402	0.750022	-0.52293	0.249706	0.241831	0.196783	-0.0836125	0.11961	0.00779129	0.185097	-0.0414808	0.102022	0.473523	0.45312	-0.057434	0.442967	0.04	0.18	-0.0495121	0.126667	0.733475	0.980703	0.205882	-0.145111	0.148	-0.5215
Abhd17b	1.42487	0.870968	-0.512771	-0.627222	-0.420289	-0.394757	1.12195	-0.446918	-0.476367	0.434729	-0.143739	-0.00661444	-0.022483	-0.103027	-0.0519858	0.0707179	0.205809	0.289282	0.242859	-0.133062	-0.237635	-0.0152349	-0.061216			-0.0355974	1.60171e-15			-0.31395	-0.477894	-0.158	-0.468
Abhd17c	2.45299	1	-0.173263	-0.322625	-0.402564	0.0747702	0.0497143	-1.39509	-0.41	1.645	0.135363	0.573518	-0.196145	0.089202	-0.0134847	-0.138691	0.0933214	0.348342	0.593662	-0.0238948	-0.254016	-0.0942313	0.00573574	-0.0866667	0.33	0.126486	0.226667	0.325176	0.587769	0.136834	0.136781	-0.238	-0.021
Abhd2	3.035	1	-0.686781	-0.075011	1.86457	0.0807156	0.24105	-0.966874	-0.629091	-0.450009	-0.333329	0.0033702	0.0934275	0.383952	0.506024	-0.0366508	0.494652	-0.158721	0.0568595	-0.115435	-0.107815	0.249592	-0.297812	0.176667	-0.05	0.155119	-0.0533333	-0.218176	0.379428	-0.689847	-0.38242	0.299	-0.018
Abhd3	0.172447	1	0.0505831	0.372983	0.810572	-1.83984	2.66903	-2.41391	-0.39	0.045	-0.0543603	-0.268786	0.0677966	-0.384751	-0.950327	-0.345717	-0.257008	0.269642	0.217387	0.0633624	-0.0167978	0.0691319	0.115681	-0.11	-0.44	0.714969	-0.42	-0.0523062	0.213125	-0.272108	-0.149829	1.601	-0.261
Abhd4	2.57816	1	-0.128284	-0.202562	-0.114383	0.0110539	-0.179033	0.248946	0.212606	-0.931662	0.0463183	0.568748	-0.758593	0.0742361	0.0777302	0.0860135	0.117977	0.257312	0.359297	0.173502	0.0742288	0.856669	0.547017	0.156667	-0.2	-0.1403	0.143333	0.389587	0.547111	0.899212	2.55067	0.374	0.858
Abhd5	1.3083	1	-0.0862101	-0.621376	-0.325026	-0.36989	0.516554	0.155992	0.171274	0.857878	-0.10129	0.180885	0.278139	-0.00243423	-0.306841	-0.0363295	0.267967	0.259666	0.321655	0.394639	0.48695	-0.185049	-0.0783139	0.0633333	0.24	0.370306	-0.243333	0.371776	0.658736	0.00331653	0.111723	0.377667	1.064
Abhd6	1.03322	1	-1.34354	-0.341256	-0.254577	-0.730753	0.508775	-1.09903	-0.943846	-0.0884557	-0.333926	-0.525104	-0.208939	-0.363812	-0.601153	-0.108672	0.310897	-0.281209	-0.531956	-0.276367	-0.454634	-0.29539	-0.0788265	-0.456667	-0.206667	-0.189307	-0.386667	-0.464187	-0.10278	-1.34132	-1.10129	-0.0475	-0.27
Abhd8	0.505886	1	-0.904581	-0.309726	-0.318313	-0.245432	0.362845	0.54336	0.685	-0.33	-0.548506	-0.330919	-0.124751	0.0703307	-0.159514	0.295098	0.191522	-0.682144	-0.617471	-0.211591	-0.201742	-0.053825	0.512148	-0.473333	-0.0266667	0.399	-0.56	-0.386976	0.386359	-0.433923	-0.480174	0.451	0.75
Abi1	2.79087	0.967742		-0.537001	-0.0652783	-0.19742	0.730878	-0.504962	-0.964248	0.226444	0.324869	0.422963	-0.0381602	-0.0110125	-0.156507	0.000570552	-0.0224865	-0.0340984	-0.0125938	0.325706	-0.000524832	0.0966983	-0.0978709	0.05	0.00666667	-0.429987	0.04	0.157607	0.397175	-0.0812375	-0.137495	-0.16	-0.081
Abi2	0.79873	0.870968	-0.646418	-0.371283	0.465556	0.19873	0.346744	-0.0986217	-0.51397	0.370292	-0.562105	-0.466702	-0.139577	0.0404294	0.339126	0.021922	0.216107	-0.117139	-0.705783	-0.69505	-0.633869	-0.348532	-0.381898			0.201279	-0.06			0.00812048	0.0128172	-0.2765	0.3895
Abi3	0.317519	0.870968	-0.794621	-0.264813	0.258415	-1.41531	1.09201	-0.152586	0.433576	-0.554259	-1.00353	-1.2121	-1.46414	-0.298354	0.118246	-0.335531	-0.023615	-0.726105	-0.525248	-0.480298	-0.580244	-0.00667914	-0.0291941			-0.191783	0.0133333			-0.0352236	-0.19538	0.034	1.33
Abi3bp	0.308475	1	0.184875	-1.48429	-2.5244	-3.55151	1.1964	5.81837	0.0254085	-0.226921	-0.229368	-0.148904	-0.0821348	-0.308004	0.209114	0.552653	-0.817237	-0.0102948	-0.0414323	0.019579	-0.0516826	-0.00460767	-0.082111	0.0133333	0.113333	0.143953	-0.673333	0.107205	0.0234645	-0.0252113	-0.0381593	1.192	-0.018
Abl1	1.22711	1	0.272071	0.342417	-0.0432383	0.156574	0.40046	-0.0946061	-0.0684342	-0.707665	0.776897	0.555927	0.0595373	0.275058	0.297209	0.200638	0.00277167	0.390313	0.196468	0.364836	0.236643	0.269388	0.390973	-0.0433333	-0.206667	-0.0208969	0.36	0.51809	0.176404	-0.0045624	-0.0597956	0.1005	0.776
Abl2	0.88649	0.806452		-0.499864	0.409213	-0.075836	0.403946	0.450657	-0.822518	-0.409875	0.44774	0.0661724		0.186985	0.209463	0.0345487	-0.131977	-0.241642	-0.210981	0.144773	0.203448	0.0245133	-0.578645			-0.0297043	0.15			0.00232649	-0.0655529	-0.152	-0.06
Ablim1	0.975182	1	-0.861843	-0.536152	-0.500677	-0.910617	-0.951347	-0.745492	0.0157533	-0.113932	0.0633308	-0.313301	-0.0495162	-0.163039	-0.192752	-0.213975	-0.0763256	0.497527	-0.741668	-0.375513	-0.375809	-0.0541169	0.343112	-0.186667	-0.0233333	-1.36603	-0.07	-0.603638	0.59627	0.945479	2.21484	0.204333	0.0233333
Ablim2	0.200115	0.870968	0.277493	0.0234318	-0.118367	0.42544	0.613172	0.29565	0.552217	-0.0650218	0.0601365	-0.313681	-0.642059	-0.142899	-0.357145	-0.389135	-0.54376	0.0765473	-0.0548111	0.0661934	0.159084	-0.00747166	0.00899029			-0.0142175	-0.236667			-0.0397007	-0.145963	-0.024	0.198
Ablim3	0.174588	0.870968	-0.17557	-1.9542	1.49099	-0.966833	-1.10335	0.447485	0.085	-0.285	0.0570207	-0.313846	0.0364873	-0.478912	-0.788413	-0.222574	-0.817163	-0.0115035	0.0167087	-0.13298	0.0681077	0.0179562	-0.0630317			0.0724824	0.05			0.270765	3.66695	0.181	-0.522
Abo	0.287153	1	-0.407452	2.0458	-0.846195	-0.0614005	1.58496	0.43122	0.76	0.11	0.222409	0.0991103	0.0126372	0.220801	-0.134801	-0.0199732	-0.15814	0.415397	-0.227688	0.102752	0.0934389	-0.141369	0.109892	0.133333	0.03	0.0486021	-0.00666667	0.0208913	-0.140614	-0.122389	-0.160219	0.234	1.267
Abr	1.69018	1	0.753229	0.151408	-0.0823104	0.600157	0.765706	0.547912	-0.44	-0.06	1.04768	1.27313	0.139947	-0.0295022	-0.21568	-0.0202734	-0.324768	-0.0144708	0.0475016	0.97128	0.867705	0.102925	0.381326	-0.226667	-0.243333	0.413284	0.386667	1.1009	0.570019	0.480968	0.485257	0.187	-0.46
Abra	0.0679866	0.870968	0.582854	-0.748128	1.73697	-3.02975	-0.277534	0.49706	0.29	-0.325	0.0246076	0.218352	-0.120852	0.0964194	-0.097507	-0.136577	-0.156604	-0.0104903	-0.19147	-0.246923	-0.25791	-0.0868557	0.00180685			0.0633254	0.08			0.195184	0.0969754	0.824	0.973
Abracl	2.54149	0.935484		-0.200632	-0.0938495	-0.00462715	0.700899	0.694817	-1	1.155	0.578939	0.27003		0.259042	0.131074	0.243635	0.329241	0.00580551	-0.160315	0.0878777	0.111384	-0.224266	0.42163	-0.0666667	0.0133333	-0.0196811	0.163333	0.348186	0.252719	0.919725	0.127288	-0.415	-0.6395
Abt1	0.813028	1	-0.553745	-0.189415	-0.105316	-0.108176	0.167103	-0.638205	-0.7	-0.02	-0.0942772	-0.1045	0.180155	0.0764661	-0.227288	-0.147149	-0.162874	-0.132249	-0.176483	-0.0305321	0.0465181	-0.120717	-0.158136	0.06	0.04	-0.323917	-0.13	-0.137324	-0.227308	0.0568304	-0.599629	-2.145	-0.125
Abtb1	0.516014	1	0.0290711	-0.0819875	-0.969657	-0.268096	0.072101	-0.502542	0.66	-1.545	0.169242	0.286193	-0.148242	0.150137	-0.0193744	-0.0846074	-0.0173622	-0.894168	-0.488651	0.333659	0.543633	0.400968	0.501672	0.146667	-0.04	0.274433	0.106667	0.261923	0.308419	0.020463	0.540262	0.211	0.812
Abtb2	0.827172	0.83871	1.45646	0.732168	1.2943	2.02169	0.636283	-0.875969	-0.923077	-0.780131	1.62898	1.81389		-0.0965866	-0.491274	-0.0608877	-0.403833	0.750385	0.320909	1.19284	1.26115	0.0369006	-0.623147			0.265544	0.946667			0.681632	0.214721	0.078	-1.072
Acaa1a	0.81172	1	-0.525845	0.254009	0.146248	-0.3737	0.290392	-1.00133	0.510866	-1.10867	-0.11965	0.123991	-0.369281	0.0538302	-0.104125	0.0585404	0.0778832	0.144927	0.00104522	0.0740617	0.0744696	-0.0137856	0.144011	-0.5	-0.313333	-0.212009	-0.203333	0.0488058	0.167798	-0.679934	0.24282	0.095	0.464
Acaa1b	0.0827553	0.967742	0.537287	0.5115	-0.70044	0.186701	-4.21049	0.116103	-1.91	-0.09	-0.092292	0.0377123		0.169949	0.00515446	-0.159927	-0.442599	0.00877101	0.113415	-0.0941052	0.309836	0.218301	0.158432	0.05	-0.0333333	0.0412349	-0.226667	-0.385833	-0.0251075	-0.812712	0.591799	0.139	-0.263
Acaa2	2.1225	1	-0.955669	-0.586861	-0.571077	-0.697044	0.285895	0.635122	-0.301415	-0.874026	0.0364366	-0.296052	-1.3779	-0.0943006	-0.00471035	-0.193064	-0.018428	0.121481	-0.44602	-0.562996	-0.536518	0.0940539	0.725344	-0.0633333	0.143333	-0.274781	-0.45	-0.19946	-0.139691	-0.696738	0.354905	0.15	0.215
Acaca	1.04015	0.870968	-0.401264	-0.248618	0.310419	-0.596762	0.533646	-1.11555	-0.364968	-0.118694	0.204946	0.0884773	0.0552673	0.138168	0.462067	-0.108265	0.298936	0.303345	-0.0241887	-0.218413	-0.230996	-0.412212	0.370421			-0.272126	-0.03			-0.123394	-0.324028	-0.74675	-0.65275
Acacb	0.182949	0.967742	0.290991	0.824887	0.367686	1.16251	0.0317089	-0.618229	0.353127	-0.371818	0.114943	-0.080424		-0.34985	-0.687212	-0.121433	0.104718	0.0210593	0.0205972	-0.0241551	0.144669	-0.0716439	-0.0141922	0.00666667	-0.0633333	0.0156401	-0.113333	-0.144766	-0.22279	-0.125951	-0.237455	-0.0525	-0.242
Acad10	0.238068	1	0.00549312	-0.744885	0.718035	-0.486849	0.899784	-0.32505	0.760202	-0.511434	-0.0883973	0.179908	-0.185844	-0.0200241	0.193919	-0.0351038	-0.141796	0.0448133	0.480626	0.149318	0.0730946	0.253317	0.261934	0.116667	0.24	0.0352855	0.0233333	0.145972	0.0595725	0.0809803	0.281975	-0.056	-0.264
Acad11	0.925453	0.967742	-0.763624	-0.431205	0.181862	-0.40518	0.101294	-2.35643	-1.41273	0.409937	0.0154174	0.296351		0.177554	0.0586946	0.108839	0.166344	0.436871	0.490393	0.2304	0.0764164	0.397821	0.555138	-0.02	0.03	0.128876	0.0866667	0.228733	0.258058	0.293503	0.900035	0.057	0.787
Acad12	0.130505	0.83871		-0.527336	-0.18083	-0.71419	-0.00862601	0.131522	1.28	-0.505	-0.194589	0.0154385	-0.402435	-0.111841	0.275227	-0.236443	-0.232937	-0.0234571	0.488768	0.392838	-0.0618307	0.377299	0.38382			0.242886	0.0333333			0.221068	0.215923	0.017	0.739
Acad8	0.612552	1	-0.784212	-0.561308	0.148497	-0.390072	-0.15992	-1.20935	-0.826147	-0.0304979	-0.329711	-0.0671161	-0.032997	0.294327	0.173729	-0.0023961	0.359428	-0.0900212	-0.176963	-0.140559	-0.117226	0.1465	0.169961	-0.276667	-0.03	0.376395	-0.233333	-0.146261	0.0148216	-0.0957965	-0.186779	0.017	0.563
Acad9	1.2257	1	-0.636925	-0.236931	-0.0613056	-0.331979	0.467827	-0.556651	-0.915677	0.379312	-0.272136	-0.065012	0.189243	-0.242284	0.0076261	-0.288412	0.221425	0.200994	0.0645951	-0.00426274	-0.0757457	-0.425255	0.162623	0.0733333	-0.0266667	-0.125663	-0.19	-0.187953	-0.0268831	-0.186307	-0.110056	0.167	-0.406
Acadl	2.26159	1	-0.552619	-0.636646	-0.0814631	-0.0994226	-0.361591	-0.395141	-0.287067	0.748608	-0.0274868	0.254621	-0.0825031	-0.376324	0.0609823	-0.381476	-0.207586	0.0940363	0.115626	0.24408	0.0862843	-0.0779542	0.117137	0.15	-0.34	-0.212977	-0.39	0.10602	0.284955	-0.202339	0.148536	0.071	0.299
Acadm	2.93129	1	-0.938055	-0.0241577	-0.721887	-0.953177	0.101572	-0.43947	-0.845	1.015	-0.622879	-0.211967	-0.745333	-0.0661749	-0.0765274	-0.231541	-0.0368347	0.166537	0.422764	-0.464645	-0.396569	0.486428	0.464658	0.22	0.183333	-0.485727	-0.516667	-0.327732	-0.256883	-0.677953	0.934409	0.042	0.564
Acads	1.79906	1	-0.0434894	0.075401	0.0904039	0.056259	0.571077	-0.047475	0.29	-1.805	0.265084	0.34999	-0.0869077	0.00682698	0.127413	-0.0713214	0.0929227	0.443804	0.371842	0.215695	0.268925	0.237268	0.379427	-0.203333	0.266667	0.1898	0.133333	0.515428	0.64	-0.254945	0.125956	0.203	-1.167
Acadsb	0.806482	1	-0.45027	-0.267309	-0.0850779	-0.45343	0.0515867	-1.15163	-0.83	0.055	-0.106338	-0.295894	-0.39897	-0.0714742	-0.117537	0.173475	0.307375	-0.190948	-0.551436	-0.150317	-0.313976	0.565998	0.120701	0.113333	-0.266667	-0.00420753	-0.18	0.0757941	0.376399	0.110394	1.05732	0.0535	0.23
Acadvl	1.78681	0.967742	-0.341769	0.0310738	0.140889	-0.766972	0.322877	-0.775703	-0.845	-0.485	0.0775262	0.532817	-0.348961	-0.0164958	0.0505737	-0.0341705	0.245442	-0.168496	-0.209523	0.26201	0.337434	0.0510891	0.108147	0.186667	0.22	0.467551		0.744557	0.548491	0.200499	0.665394	-0.1	0.334
Acan	0.160861	1	-1.18387	0.831462	-0.0842901	-0.530138	-0.0116818	0.450917	0.82	-0.505	0.149959	-0.095922	-0.347508	0.300585	0.0102789	-0.474902	-0.0313388	0.111872	-0.040719	-0.15594	-0.00797112	-0.134679	-0.529179	-0.216667	0.11	-0.426888	0.176667	0.102063	-0.19417	-0.240996	-0.34573	-0.245	-0.286
Acap1	0.195815	0.870968	0.3745	-0.379836	0.118504	-0.269129	0.365934	0.423574	0.651472	-0.325161	0.356848	0.00716895	-0.166597	-0.211025	0.645076	-0.230373	0.232762	0.0663239	-0.317582	0.0437467	0.203604	-0.0955765	0.0452523			-0.746951	1.22667			0.154555	-0.00841106	0.173	-1.455
Acap2	1.46141	0.806452		-0.952797	-0.700225	-0.429137	-0.28539	-0.192454	-0.574726	0.00517673	-0.0950435	0.0473956		0.173886	0.240795	-0.0344638	0.027915	-0.117528	0.0448889	-0.29687	-0.243955	0.159813	-0.204625			-0.462963	-0.13			0.0615624	0.486133	0.202	0.631
Acap3	0.516137	0.870968	-0.500464	-0.809984	-2.33771	-0.431007	0.416143	0.258487	0.695	-0.78	0.25028	0.200339	-0.0638577	0.0438285	-0.0139003	0.166861	0.173033	0.0201472	-0.240031	0.0180922	0.0270194	-0.144282	0.27807			0.176297	-0.17			0.0369973	0.00642347	0.009	0.308
Acat1	1.90758	1	-1.04641	-0.398542	-0.477535	-1.12471	-0.019542	-1.70633	-1.71495	0.582251	-0.55669	-0.170351	0.0260634	-0.353477	-0.0120532	-0.141793	0.150026	0.00258467	-0.796001	0.221375	0.140948	-0.00727498	0.332139	0.07	-0.0666667	-0.511462	-0.546667	-0.368652	0.359844	-0.723253	-0.0821471	0.002	0.563
Acat2	3.48376	0.967742		-0.281643	0.140655	-0.342065	0.372978	-2.01343	-1.86	0.155	-0.47477	-0.122436	-0.3545	-0.221022	-0.0409085	-0.211401	0.060521	-0.0176018	-0.643354	0.121787	0.241341	-0.243901	0.680255	0.26	0.413333	-0.928675	-0.0266667	-0.712109	-0.395101	-0.247963	-1.10046	0.207	-0.483
Acat3	0.105071	0.580645	0.0463219								0.531332	1.5632	0.367838	-0.0566738	-0.0466091	-0.323454	0.0251554	0.0732037	0.145536	1.09218	1.14236	0.0636943	0.50076			0.0123302	0.00333333					0.203	-0.193
Acbd3	1.33823	1	0.0405767	-0.240898	0.103471	-0.430112	0.481318	-1.08555	-1.76483	-0.0282873	0.201287	-0.0269142	0.107337	0.0431776	-0.113486	-0.201592	0.00716533	0.35929	0.295574	0.375649	0.163198	0.120953	-0.089253	0.106667	0.15	0.230331	0.303333	0.198594	0.167821	0.368814	-0.0805403	-0.074	0.337
Acbd4	0.451008	0.870968	-0.131955	-0.413707	0.191925	-0.31128	-0.00242675	-0.40758	0.398853	-1.18469	0.189984	0.301915	-0.704323	-0.172121	-0.311429	-0.0737051	0.158389	-0.0584553	0.182841	0.133448	-0.135239	0.298018	-0.106741			-0.0894089	0.196667			0.00933997	0.449546	0.104	-0.1535
Acbd5	0.75954	0.870968	-0.990889	0.13788	-0.387938	-0.77382	0.59679	-0.417442	-0.340352	-0.0943903	-0.640274	-0.0976664	0.0475878	0.322426	0.0845128	0.121905	0.100008	-0.38884	-0.0110635	-0.327782	-0.279767	0.0823925	0.309063			-0.952755	0.0466667			-0.255615	0.222068	0.123	0.376
Acbd6	0.992202	1	-0.573742	-0.267689	0.0147138	-0.519204	0.362934	-1.11547	1.44555	0.248135	-0.0869792	0.0700477	0.129265	-0.18461	-0.0208512	0.0673569	0.280094	0.0493556	0.131097	-0.11609	0.00735046	-0.059956	-0.12474	-0.06	0.0533333	-0.166432	-0.0833333	-0.0802023	-0.0271483	-0.0194499	0.199145	-0.159	-0.431
Acbd7	0.043692	0.806452		-1.18194	-0.0574283	-1.29341	0.330645	0.135773	0.055	0.195	-0.0892723	-0.129126		0.144957	0.149743	-0.0582677	-0.0475141	-0.163018	0.0147038	-0.0728294	0.145931	0.00215496	0.0121914			-0.00169825	-0.06			0.0959269	-0.0633128	-0.501	-0.731
Accs	0.410528	0.870968	-0.386673	0.229535	0.179311	-0.36139	0.0629683	-0.540283	0.64	-0.865	0.396264	0.265571	0.374396	0.0310524	0.232446	-0.0018259	0.0196476	-0.140258	-0.137471	0.423294	0.380341	0.314553	0.480384			0.194535	-0.266667			2.385e-07	5e-10	0.179	0.726
Accsl	0.0720349	0.806452		-1.02857	0.0824622	-2.33628	1.63005	-0.168828	0.585	0.12	0.0993197	0.173768		-0.131466	0.786183	-0.112334	0.695781	0.0763841	-0.0522508	0.431007	0.434197	0.0219357	0.0238395			0.217029	-0.0833333			0.134372	-0.0867611	0.159	1.237
Acd	1.26205	1	-0.74209	-0.263505	-0.313097	-0.48569	-0.0111301	-0.495928	1.645	0.6	-0.140645	0.0904914	-0.0822933	-0.241094	-0.13759	-0.120399	-0.0159945	-0.29779	-0.192706	0.159312	-0.126585	-0.0344618	-0.0140473	-0.16	-0.17	0.162011	-0.04	-0.204795	-0.308711	0.075345	0.187934	0.164	0.369
Ace	0.231683	1	0.557587	0.0530836	0.409104	0.0611115	0.494396	1.1004	0.716951	-0.123551	0.00951426	-0.142428	-0.0422675	-0.179044	0.593067	-0.21597	0.220999	0.257112	0.0277164	0.188458	0.0351625	-0.0347571	-0.0132975	-0.0866667	0.00666667	-0.454662	-0.04	0.0865075	-0.0390867	0.185594	0.0555513	0.157	0.128
Ace2	0.355393	1	-0.0358824	-1.04239	0.550098	0.443201	-1.03082	-0.108812	0.359672	-0.336986	-1.37985	-2.39131	0.0960139	-0.181084	-2.11507	-0.0780571	0.348247	0.981578	-0.0970265	-1.02856	-1.18012	0.0509274	1.01088	0.1	-0.0366667	0.0797264	-0.06	0.06573	-0.0478905	0.0576113	0.152864	0.493	-1.838
Acer1	0.661277	1	1.06364	0	0.857981	2.48938	1.2578	-0.121916	0.279457	-0.0605609	-0.088984	-0.269156	-0.0486384	-0.179132	-2.18317	-0.136508	0.323696	-0.0396843	-0.0998949	0.08659	0.0284599	-0.156398	0.0539906	0.0766667	0.196667	-0.0323366	0.103333	0.0641998	-0.207217	-0.071893	-0.0367866	-0.224	0.147
Acer2	0.14132	0.967742	0.278656	-0.522207	-0.278802	-0.613182	0.162406	0.558909	0.383126	-0.00645403	0.166017	-0.051302		0.103938	0.239794	-0.00351533	0.0306972	0.226404	-0.0912392	0.0029893	0.18281	0.0076826	0.0579447	0.0133333	0.123333	-0.26831	0.03	0.0507488	-0.0967588	0.0340067	-0.0628747	0.167	0.149
Acer3	1.32142	0.870968	-0.87434	0.0637491	0.335179	-0.219167	-0.112484	-0.845974	-0.807122	0.254633	-0.776334	-0.66443	-0.259479	-0.0859814	-0.37127	0.178901	0.101733	-1.06413	-0.758978	-1.15335	-0.999846	-0.346862	0.216172			-0.282167	-0.58			-1.26955	-0.19151	-0.061	-0.902
Ache	0.256491	1	-0.13772	-1.06413	-0.389947	1.90442	2.1973	0.23644	0.62	-0.505	0.234951	-0.185305	-0.672084	-0.0656677	-1.13565	-0.0520578	0.0614889	-0.135356	-0.0716792	0.0874968	0.0124679	0.195786	0.0705933	-0.07	0.233333	-0.0548053	-0.0566667	0.00509191	-0.126279	-0.040729	-0.120524	0.1775	0.114
Acin1	1.35025	1	-0.392532	-0.416651	-0.396524	-0.363943	0.478598	-0.00500619	-0.60977	-0.0202807	0.0681221	-0.176998	0.00577073	0.0774009	0.283959	0.0285212	0.0572827	-0.0874762	-0.151087	-0.0947645	0.0146689	-0.147783	-0.114203	0.18	-0.00666667	0.162865	0.0933333	-0.155839	-0.236605	0.151834	-0.287019	0.0665	0.331
Ackr1	0.153009	1	0.0937415	-0.377012	0.877763	-0.0565835	0.826114	0.618808	1.22	-0.18	0.170018	-0.181653	-0.0593957	0.22755	-0.437802	0.0552719	-0.0261501	0.056718	0.0485929	0.0169946	0.150933	-0.093017	0.016009	-0.05	0.06	-0.0221574	0.07	-0.047982	-0.0235744	0.0179625	-0.0621214	-0.054	0.183
Ackr3	0.563709	1	1.08617	0.367705	-1.73813	2.81794	1.02484	5.92824	-2.99	0.135	0.0418384	0.105409	-0.0116161	0.139158	-0.311863	0.476042	-0.294737	0.115326	-0.0738785	0.994044	1.19619	-0.242706	-1.00976	-0.0233333	0.0633333	0.283539	0.0833333	1.30687	0.817523	0.319629	-0.61768	-0.168	-0.257
Ackr4	0.220117	1	0.466861	0.151853	-1.38369	0.0155154	-0.25126	-0.37894	-0.0809636	0.0314232	-0.165208	-0.0412337	-0.0183501	-0.13078	0.019859	-0.329884	-0.236134	0.106617	0.0322499	-0.148206	0.0985075	-0.0723878	0.0612415	0.00333333	-0.0466667	0.00950416	0.0633333	0.370568	0.128865	-0.0221288	-0.0381348	0.782	0.4475
Acly	3.65486	1	0.110611	2.74818	1.51467	-0.205221	1.99186	-0.00590496	-0.335784	0.396825	0.0546689	0.129074	0.140869	-0.130433	0.0229937	-0.113607	0.10734	0.105005	0.027838	0.0109724	0.00818824	-0.311848	0.419829	-0.0566667	0.0933333	-0.306917	0.226667	0.175068	0.201103	0.0708813	-0.147618	-0.2315	-0.572
Acmsd	0.0539925	0.516129									0.101605	-0.0142543		0.0910868	-0.323416	-0.0737572	-0.209246	0.19906	-0.0560005	-0.0663344	-0.118713	0.00962411	-0.0982966			-0.0867287	0.15					-0.265	-0.443
Acnat1	0.588954	0.516129									-2.59223	-2.3713		0.243426	-0.475158	0.0922691	0.217065	0.431004	0.541002	-1.45478	-1.77037	0.0717088	0.195974			-0.14267	0.16					0.087	-0.033
Acnat2	0.14077	1	-2.65735	1.16993	-2.70695	0.311944	0	-0.19811	0.235	-0.02	-0.418374	-0.431266	-0.0264141	-0.202271	0.139425	0.0578611	-0.329519	0.192036	0.0428056	-0.841304	-1.22777	-0.299173	-0.367258	-0.103333	-0.116667	0.0485307	0.16	-0.20722	-0.368058	-0.292271	-0.239026	-0.1845	0.187
Aco1	1.76964	1	-0.270613	-0.0969828	-0.0132287	-0.485396	0.436666	-0.210044	0.57215	0.427197	-0.230649	-0.0551367	-0.00723474	0.0622759	0.515606	0.326644	0.64134	0.191044	0.182298	0.0145648	0.0963333	-0.0442352	0.120097	-0.0633333	-0.17	-0.174918	-0.1	-0.0172947	0.280128	-0.197125	-0.147256	-0.036	-0.114
Aco2	5.54364	1	-0.402571	-0.344553	-0.242642	-0.554504	0.324004	-0.0709772	0.814079	1.23773	-0.0667721	-0.0977682	-0.366624	-0.174787	0.121263	-0.217875	0.129238	0.261185	0.196199	-0.0155826	-0.0963498	0.11453	0.0554229	0.0233333	-0.07	-0.00706736	-0.163333	-0.155645	-0.079934	-0.160214	0.600986	0.108	0.373
Acot1	0.87077	1	-1.33856	-0.196229	-1.27335	0.170704	0.323765	-3.49187	0.28	0.415	0.166771	-0.0858673	-0.784324	-0.180105	-0.42976	-0.454156	0.0518873	0.144454	0.251147	-0.0751056	-0.324371	0.472935	0.23119	0.11	0.16	-0.12514	0.17	-0.192755	-0.526341	-0.405025	1.78419	-0.74	1.688
Acot10	0.55204	0.580645	0.403012								0.266293	0.119051	0.112405	0.128282	0.127343	0.514991	0.264739	0.0537694	0.160853	0.22819	0.271759	-0.375162	-0.461926			-0.122917	0.106667					0.164	0.519
Acot11	0.275739	1	0.545215	-0.321356	0.533324	-0.219109	0.226492	0.498663	0.801247	0.0120578	-0.0310553	-0.0287498	-0.0528798	-0.063551	0.138346	-0.232668	-0.411908	0.081271	-0.0835441	0.0435289	0.0617603	-0.00551508	0.00400117	0.343333	-0.0266667	0.0546031	0.126667	0.156719	0.0860727	0.0976295	-0.157893	-0.131	0.217
Acot12	0.145007	1	0.457135	0.502745	-0.669869	0.497436	2.39871	0.0376568	0.634706	-0.142783	-0.0504896	0.0936564	-0.0684667	0.0296826	-0.170369	-0.0702056	-0.21944	-0.0401879	-0.0905225	0.298367	0.0528556	-0.0372387	0.0441131	0.156667	0.18	0.0727459	0.00333333	-0.0165982	-0.0719213	0.0681876	-0.0674585	0.266	0.703
Acot13	1.89326	1	-0.422956	-0.25555	-0.820552	-0.610665	0.0831523	-1.16822	-1.155	1.12	0.0566893	0.332797	-0.117866	-0.240401	-0.0944394	-0.0349255	0.19135	-0.31486	-0.270117	-0.163458	0.079664	0.0660729	0.525988	0.0366667	-0.04	-0.227297	0.1	0.449071	0.0244425	0.489972	1.28283	0.03	0.253
Acot2	1.2098	1	-0.371897	-0.610136	-0.0704736	0.0150164	0.237024	-1.75585	0.851861	0.689544	-0.37286	0.00442897	-0.166669	-0.198897	-0.163966	-0.230028	-0.264051	-0.00258967	0.506093	-0.57638	-0.930135	0.876939	-0.504033	-0.02	-0.05	-0.359051	-0.376667	-0.187347	-0.26317	-0.342391	0.390301	-0.472	0.363
Acot3	0.190732	1	-0.195912	-0.482152	-1.97303	-0.215729	-2.21184	0.819218	0.44	-0.26	-0.191724	0.0206605	-0.0281239	0.163056	0.472859	0.0915747	-0.145181	0.0138045	0.161559	0.0912851	0.040987	0.176806	-0.0740325	-0.0166667	0.126667	0.0122767	0.07	0.00314303	-0.0460567	0.0356665	-0.0773518	0.3715	-1.0525
Acot4	0.0799162	1	0.336079	0.698711	0.757728	1.32144	1.57877	0.476514	0.242866	-0.136351	-0.047123	0.0992464	-0.0604628	0.211182	-0.0252089	0.166708	-0.0491137	0.0759672	-0.142521	-0.0861082	-0.0702075	-0.132313	-0.0116823	-0.19	0.29	0.0509968	0.15	0.265509	-0.0401359	-0.0895802	-0.136097	0.171	-0.485
Acot5	0.284294	0.967742	0.208271	0.163499	0.459432	-1.20163	0.830075	-0.150053	0.52	-0.29	0.0559929	-0.162943		-0.0310925	-0.225526	0.00376965	0.14244	0.0117814	-0.0961694	0.117993	0.0279663	-0.130129	-0.151476	0.0366667	-0.07	-0.392159	0.0233333	0.110515	0.0239654	0.208969	0.172472	0.025	0.0125
Acot6	0.151956	0.870968	1.29703	-0.0616817	-0.000860734	-0.15309	0.619867	-0.451273	0.664119	-0.710649	-0.0904327	-0.123058	-0.0249843	0.0103872	0.379954	0.120488	0.123247	-0.0378235	0.0113359	-0.0766597	0.142483	0.32791	0.0192114			-0.17951	-0.3			0.0751816	-0.0828193	-0.05	-0.064
Acot7	3.69427	1	0.00602145	-0.224012	0.795794	-0.0613922	0.587557	2.38585	0.745	-0.25	0.276759	0.163676	-0.282998	0.105177	0.407476	-0.0503801	0.922346	-0.295713	-0.451883	0.263946	0.326929	-0.184339	-0.194695	-0.246667	-0.133333	0.169856	0.113333	0.296275	0.630554	0.191429	-0.544528	-0.04	-0.297
Acot8	0.758928	1	-0.716042	-0.425575	-0.101955	-0.261761	0.178177	-0.795753	1.29	-1.43	0.0226651	0.111297	-0.0360344	0.0716685	0.298221	-0.182208	0.278321	0.0118023	0.0122976	-0.0819403	0.0897083	0.140415	0.047882	-0.07	-0.0733333	0.0304172	-0.176667	0.124123	0.0626832	0.230208	0.156324	0.2145	-0.055
Acot9	3.50094	1	-0.049351	-0.259226	0.426055	0.009896	0.451978	0.648172	-2.025	0.435	0.439041	-0.0921	6.947e-05	0.43927	0.311332	0.157644	0.217023	0.129809	0.0663667	0.281807	0.529959	-0.404389	-0.471954	-0.0333333	0.12	-0.00766441	0.113333	0.550614	0.651439	0.493114	-0.0863872	0.281	0.321
Acox1	1.68253	1	-0.562077	-0.0694481	-0.155502	-0.492889	-0.180754	0.146779	-0.187885	0.226226	-0.347526	0.0820728	-0.084025	0.0225976	-0.134096	0.0632623	0.5515	0.0539357	0.0908065	0.0140513	-0.0922815	0.437086	0.499681	-0.0166667	0.27	-0.201948	-0.0833333	0.193149	0.797874	-0.102377	0.522049	-0.144	0.531
Acox2	0.770166	1	1.41611	-0.494649	0.436344	-1.2764	0.381243	-6.35309	2.135	1.37	0.907191	0.772708	-0.445478	-0.369697	-0.78919	-0.0486278	0.00741236	0.0640898	0.0161455	1.73955	1.40749	-0.00759784	-0.449777	0.203333	0	-1.06551	-2.8	1.69153	1.46422	-0.0232775	1.19551	-0.016	-1.115
Acox3	0.251966	1	-0.23278	-0.46951	0.0183097	0.52801	-0.132738	0.0518113	0.63742	-0.00561302	0.474413	0.338832	0.00610941	0.104678	-0.274038	-0.112581	-0.322917	0.141889	-0.00506468	0.369323	0.223497	0.134743	0.321362	-0.0166667	0.0866667	-0.0396821	0.0333333	0.0797911	0.216218	0.0208289	0.286024	0.0143333	-0.088
Acoxl	0.122466	0.870968	0.31292	0.665581	-1.53605	1.72348	0.683526	0.293382	0.76	-0.54	0.0847414	-0.18127	0.0505031	-0.826183	-0.933407	-0.155808	0.20333	0.0779669	-0.0392524	-0.0796687	0.248829	0.0346253	0.0201243			-0.0490111	-0.02			0.193271	0.0467298	0.1305	0.161
Acp1	1.55955	1	-0.340511	-0.118177	0.416337	-0.374443	0.557918	-0.650318	-0.670348	0.43557	0.0191697	-0.216905	0.0313235	0.0913131	0.393914	0.180858	0.216114	0.0547262	-0.0788183	-0.0927317	0.0236278	-0.283202	-0.210348	-0.0233333	0.146667	-0.0705936	-0.0566667	-0.0385322	-0.233211	-0.24561	-0.553407	0.0946	0.0614
Acp2	0.886974	0.967742	-0.0402031	-0.187284	-0.281577	-0.146126	0.112184	0.192627	0.506281	0.98808	0.374492	0.797119	-0.0452932	-0.109751	-0.0544924	0.0837329	0.124833	0.116285	0.242315	0.167869	0.0199387	0.288763	-0.0226425	0.0566667	0.0433333	-0.258439		0.267288	0.34414	0.26511	1.2322	0.062	0.3365
Acp5	0.552528	1	0.151269	-0.639237	0.667425	-2.34958	0.661198	2.90855	0.75	0.17	-0.108897	-0.222588	0.0288524	0.190456	0.0775527	0.227691	0.00955769	0.0237822	-0.00512135	0.123221	0.0639255	-0.086419	-0.0296219	0.256667	0.226667	-0.437726	0.0633333	0.123534	-0.0883267	-0.116735	-0.275943	0.0915	0.6225
Acp6	1.09662	1	0.243378	-0.707311	0.134227	1.46736	-0.206377	-0.411316	0.161949	-0.477086	0.609959	0.480954	-0.0855466	-0.344268	-0.249435	-0.206136	-0.108531	-0.0424246	0.200118	0.611124	0.445527	0.342934	-0.422908	0.22	0.28	1.81611	0.113333	0.581746	0.540346	-0.202409	-0.240423	0.068	-0.238
Acpp	1.25959	1	0.376497	0.712122	0.128339	0.423891	-0.300293	3.03598	0.499699	0.125273	0.346041	0.33149	0.0887161	0.0674005	-0.0301675	0.0432712	-0.0684079	0.229411	-0.0287015	0.155497	-0.117972	0.204921	-0.0757515	0.03	-0.196667	1.73258	1.84	0.0149215	0.0447366	0.047948	-0.22502	0.9845	1.146
Acpt	0.231701	0.451613									0.0785592	-0.166374		0.113676	-0.358671	-0.00535398	-0.412784	0.0449235	0.0416982	0.00559123	0.211193		0.052292			0.0171137						0.742	1.024
Acr	0.559438	1	0.565118	-0.0431147	0.504956	-0.219507	0.230101	-0.026375	0.78	-0.32	-0.117918	-0.278339	0.0833461	0.212805	-0.365689	-0.13928	-0.181594	-0.00205515	-0.000520079	-0.0708931	0.0887729	0.00894656	-0.0122326	-0.213333	0.236667	0.223369	0.00333333	0.126192	-0.123854	0.0904448	-0.181753	0.046	0.156
Acrbp	0.329626	1	-0.0735302	-0.976858	-1.00104	0.0373877	0.8177	0.0145007	0.575027	-0.0612747	0.0256272	-0.117169	-0.0424586	-0.199083	-0.269846	-0.290694	-0.250964	0.0845835	-0.00697178	-0.0747285	-0.149948	0.24179	0.0579377	0.1	0.183333	0.00464185	0.0433333	-0.0893479	-0.125532	-0.0787194	-0.151176	0.161	0.303667
Acrv1	0.0719356	1	0.272872	-0.508409	0.323973	-0.446647	0.716607	0.130658	0.365	-0.105	-0.138189	0.00202796	-0.0398689	0.0571367	-0.110078	-0.0934613	0.211894	0.0113884	-0.0824025	0.0135227	0.219017	0.190449	0.145687	-0.03	-0.16	0.0492457	-1.60171e-16	-0.0312905	-0.142761	0.0778918	-0.422406	-0.033	-0.273
Acsbg1	1.79768	1	0.494957	2.41949	5.0787	5.34717	3.89711	3.96925	0.27	-1.07	1.16862	1.53696	0.154864	-0.257861	-0.173183	-0.253325	-0.440287	-0.461869	0.151492	0.765197	0.712379	0.0441969	-1.98798	-0.36	-0.166667	0.74773	1.72667	0.656733	0.353878	0.22733	-0.82939	-0.1	-0.275
Acsbg2	0.0684064	0.83871		-0.906891	-0.514573	-0.50696	1.22239	-0.12552	0.635	0.28	0.183029	-0.000705641	-0.0814817	0.000735393	0.0508311	-0.13594	-0.168044	0.00435214	-0.170334	-0.0269606	0.224968	-0.0725007	0.0322834			-0.0773511	0.12			-0.239971	0.0121617	0.049	0.212
Acsf2	0.715465	0.83871	-0.699655	-0.185032	-0.180646	-2.73596	1.8134	0.035015	0.655	-0.355	-0.124397	-0.171676		-0.104242	0.514851	0.640388	0.107478	0.17932	-0.212129	-0.337934	-0.394679	0.970138	0.286937			1.00181	0.3			0.0370376	0.168717	-0.202	0.551
Acsf3	0.423099	0.967742	-0.631986	-0.164325	-0.223923	-0.903908	0.331747	-0.403233	0.375	-0.79	-0.177367	-0.0255364		0.0622566	0.139693	0.203387	0.259921	0.206308	0.161893	-0.0104306	-0.0131135	-0.0691845	-0.0401376	-0.203333	0.166667	-0.0024983	-0.153333	-0.0539975	-0.123485	-0.226089	-0.0169189	0.128	0.023
Acsl1	1.30868	1	-1.6509	-0.428604	-0.493985	-0.468949	-0.212094	0.30766	-0.175252	0.137402	-0.788353	-0.340716	-0.415409	-0.161346	-1.22626	-0.159746	-0.0587361	0.106224	0.102951	-0.792505	-0.890706	0.414577	0.301539	0.01	-0.0333333	-0.291999	-1.02667	-0.481298	-0.398819	-0.497363	0.380756	0.1505	0.229
Acsl3	1.22941	0.83871	0.378921	0.823193	0.0791022	0.85488	1.22727	-2.85398	-1.36279	0.834119	0.209113	0.802059	-0.23542	-0.063133	0.236335	0.14639	-0.0384799	0.360229	0.276894	0.942634	0.837272	-0.376499	0.258809			0.0930242				-0.911735	-0.320075	-0.015	0.02
Acsl4	2.8644	1	0.104541	-0.234074	0.529223	-0.298227	0.50777	-2.35018	0.46151	1.38086	-0.493133	-0.643011	-0.116354	0.365777	1.19241	0.272269	0.247543	0.409794	0.249276	-0.546807	-0.57211	0.0718519	0.0627144	-0.156667	0.0666667	-0.0966147	0.146667	-1.04903	-1.15452	0.477502	0.285524	-0.078	0.526
Acsl5	4.79238	1	-0.512587	-0.528494	-0.438684	-0.538375	0.0663479	-1.4038	-1.885	0.54	-0.425359	0.0838057	-1.09229	-0.352965	-0.0767986	-0.177062	0.00660741	0.0395305	-0.18086	-0.201459	-0.222642	-0.698333	-0.362526	0.133333	-0.11	-0.700071	-0.583333	-0.691011	-0.607952	-0.882608	-0.452083	-0.096	-1.069
Acsl6	0.163471	1	0.18994	-0.190139	1.1224	2.84496	1.2716	3.2828	0.236632	0.0749929	-0.00131349	-0.0737582	0.0988601	0.203285	-0.249241	-0.251832	-0.234424	0.0793982	0.0126432	0.055896	0.0289024	0.0248781	-0.0273408	-0.12	0.0266667	0.935464	0.0466667	0.250532	0.218196	-0.0972433	-0.209312	-0.083	-0.5605
Acsm1	0.124704	1	0.388891	0.425219	0.480166	-0.373178	0	-0.0368217	0.26	-0.28	0.198934	-0.0490946	0.142991	0.0889231	-0.167594	-0.19343	-0.156248	0.196858	-0.230953	-0.0216234	0.111558	-0.0197195	-0.0147234	-0.156667	-0.0766667	0.00341085	-0.00666667	-0.0282322	-0.145361	-0.0918517	-0.430013	0.1495	-0.435
Acsm2	0.113961	0.967742	0.361322	0.0946762	0.78235	-0.0485329	0.820489	0.0698698	0.357416	0.0095596	0.0789922	-0.0536799		0.0727838	-0.172453	-0.0524745	-0.113944	0.113092	-0.0424938	0.118962	0.198969	0.189069	0.113495	0.02	-0.06	0.0354252	0.0266667	0.00954243	0.0123837	0.00801952	-0.091274	0.008	-0.219
Acsm3	0.655281	0.967742	-0.00762851	-0.215013	0.225767	1.56704	1.03953	-0.254325	0.18	-0.13	0.0126349	-0.154429	-0.0713873	-0.274276	-0.748487	-0.187737	-0.162412	0.0785404	-0.0565784	-0.148453	0.0943503	-0.112311	-0.00572532	0.31	0.45	-0.010326		0.0698047	-0.100434	-0.0226319	-0.080689	-0.660667	-0.61
Acsm4	0.0957215	0.548387	0.558151								0.0643376	-0.0462132		-0.0909606	-0.130289	-0.305111	-0.244879	0.152207	0.0949997	0.0677243	0.279193	-0.0163461	-0.0756027			0.143516	0.00333333					0.022	-0.373
Acsm5	0.0673112	0.870968	0.527321	-3.10014	0	0.552541	0.696608	-0.213198	0.115	-0.41	-0.0570273	-0.182116	-0.031241	0.0660821	-0.0933982	-0.0160851	-0.265923	0.111251	0.0412737	-0.0895405	0.0256983	0.00911047	-0.0391057			-0.0174923	0.103333			-0.133373	-0.104329	0.666	-0.736
Acss1	0.123174	1	-0.0843907	0.849871	0.899887	-0.87725	0.456834	-0.447144	0.155041	0.0317302	-0.052505	-0.187064	-0.107045	-0.209437	0.104997	-0.219513	0.317901	0.172301	0.136106	0.0512322	-0.0255517	0.0932635	-0.0093723	0.0433333	0.03	-0.00731773	-0.0333333	0.12437	0.09	0.0493039	-0.0537859	0.159	0.315
Acss2	0.409287	0.967742	-0.863829	0.0483382	0.381804	-1.5142	1.43881	-0.842473	0.340592	-0.194551	-1.51701	-0.821253		0.0975004	-0.550757	0.362759	0.419118	-0.122661	-0.567157	-0.465929	-0.224248	0.294952	0.252994	-0.07	-0.0966667	-0.805426	-0.12	0.0575715	0.0570348	0.0427626	0.700056	0.25	-0.0525
Acss3	0.0828548	0.580645	0.310109								0.0666889	-0.0839277	0.0183443	0.0809786	-0.279581	-0.0839927	0.0503553	0.0613643	-0.176394	0.02054	0.100228	-0.0334655	-0.00861483			-0.0197687	-0.54					0.137	0.258
Acta1	0.585481	1	0.317689	0.398512	-2.36773	0.507231	1.03539	5.22314	-0.05	-1.06	1.8045	0.300691	0.0255742	-0.229339	-0.248715	-0.176203	-0.274597	0.234506	1.00792	0.269904	0.214021	-0.301562	0.0574236	-0.273333	-0.0966667	-0.463786	0.663333	0.880457	1.01072	2.366	-0.262136	0.1	-0.175
Acta2	0.561684	1	1.89144	-0.0904574	-0.182622	1.80441	1.81761	2.13132	0.467949	0.125434	1.77531	0.14581	1.0631	-0.0151585	2.89016	0.266881	1.30944	-0.0989902	0.259991	0.447947	0.154363	-0.312599	-0.12329	0.01	0.14	0.255479	1.52	0.25063	0.024469	3.4585	-0.263782	0.065	-0.023
Actb	26.1548	1	0.0981423	-0.117682	0.139852	-0.0886146	0.158457	0.291448	-0.265643	-0.436039	0.176556	0.0729617	0.184827	-0.0272442	0.0011765	-0.00490124	-0.00476329	0.0178178	0.00355483	0.0154232	-9.34598e-05	0.00251722	0.00317961	-0.06	0.1	0.0713774	0.143333	0.177107	0.0960112	0.146359	-0.207089	0.599	1.268
Actbl2	0.0912582	0.580645	0.214517								0.0747073	-0.0286881	0.0206974	0.0123288	0.113764	-0.255989	-0.127028	0.13289	0.102788	-0.0212492	0.0661133	0.0220343	-0.0124168			-0.117803	0.0533333					0.145	-0.126
Actc1	0.253088	0.967742		-1.33466	2.81399	0.384962	0.945867	0.460212	0.43	0.215	0.208318	-0.237876	-0.0168046	-0.0145999	0.0130361	-0.0823613	-0.210145	0.146707	0.0584724	0.116672	0.198623	-0.103215	0.0474826	-0.0733333	0.243333	0.157801	0.206667	0.0561926	-0.072241	0.476167	0.026248	-0.316	-0.402
Actg1	23.0445	0.83871		-0.0733311	0.121724	0.0232667	0.198187	-0.0671667	0.095	-0.09	0.2399	0.0668491	0.121257	0.0198097	0.181688	0.0114048	0.110511	0.193728	0.215574	0.0500982	0.0161074	-0.0126561	-0.0311294			0.130878	0.18			0.246402	-0.0890131	-0.0628	0.1212
Actg2	0.13981	1	0.0529194	0.602829	1.20087	2.13171	1.89077	1.37428	0.645	-0.7	0.490189	0.0676588	-0.131477	-0.160467	-0.0335793	-0.0531472	-0.218484	-0.071426	-0.396401	0.102729	0.0919749	-0.202857	-0.0894042	0.136667	0.32	0.151067	0.876667	-0.0492645	-0.134041	1.1645	-0.0769854	0.148	0.363
Actl10	0.24243	0.806452		0.154424	0.0398927	-0.786596	0.15763	0.419218	0.935	-0.52	0.0850374	-0.28286		0.0835434	-0.0658752	-0.0296191	0.0212297	0.234308	-0.0242427	0.152824	0.0725753	-0.0774514	-0.0573357			0.201247	0.13			-0.12162	-0.0393851	-0.03	-0.151
Actl11	0.0827317	1	0.710904	-0.222392	-0.50696	0.275634	1	0.0151767	1.1	-0.13	0.142843	-0.302977	0.0224106	0.329898	-0.343311	0.122272	-0.141046	-0.0676966	-0.20135	0.0292083	0.283676	0.0768383	0.0367249	0.13	0.146667	0.0583988	0.156667	0.10735	-0.189193	-0.0380905	0.0101578	-0.045	-0.156
Actl6a	3.06476	1	-0.275856	-0.305512	-0.0941998	-0.325569	0.369732	-0.654139	-0.30248	0.533632	-0.0538557	-0.357745	0.222604	-0.220788	0.16657	0.0433148	0.146155	-0.0587434	-0.108725	-0.115121	-0.200413	-0.387406	-0.155726	-0.236667	-0.136667	-0.111928	0.03	-0.381951	-0.462517	-0.427286	-0.736046	-0.049	0.384
Actl6b	0.194892	0.967742	0.27163	-0.451379	-0.204358	0.732808	2.72583	0.12092	0.775	0.02	-0.133334	-0.155778		-0.00902164	-0.124429	0.0238751	-0.235938	-0.19616	-0.0325027	0.0548864	0.064859	0.0415671	0.0059294	0.183333	0.0766667	0.0629865	-0.01	0.0316505	-0.134155	-0.0385442	-0.248792	-0.043	-0.207
Actl7a	0.177854	1	-0.371257	-0.066769	0.0333586	-1.22925	2.08678	0.0500483	0.585	-0.385	-0.0681809	-0.281295	0.0227265	0.0458314	-0.0748602	-0.136087	-0.179887	-0.10289	0.196652	0.0116539	-0.0519517	-0.0452001	0.0320684	0.176667	0.333333	0.112337	0.06	-0.0249771	-0.154848	-0.0612085	-0.107301	0.256	0.241
Actl7b	0.186103	1	0.245687	-0.357401	0.686634	-0.0884805	0.133267	0.331003	0.725	-0.23	0.157324	-0.129131	-0.00405721	0.104041	-0.0920354	-0.203624	-0.241162	0.0428552	0.000890202	-0.0953011	0.0794843	-0.0824314	0.0208594	-0.0733333	0.356667	0.105511	0.21	0.00852948	-0.0519186	0.0161679	-0.0619526	-0.041	0.019
Actl9	0.0908288	0.870968	0.245755	-1.19155	0.291639	-0.386056	1.72572	-0.114912	0.312606	-0.166902	0.24905	-0.247811	-0.0673351	0.351599	-0.0107635	0.0753921	-0.341685	0.145114	-0.179379	0.181416	0.246766	0.004151	-0.0380809			0.00456018	0.126667			-0.0545204	-0.11998	0.517	-0.181
Actn1	2.86669	1	0.693687	0.283235	0.143364	0.206053	1.30885	0.237942	-1.17894	0.54513	1.3869	0.874766	0.977113	0.35476	0.00286089	0.0938445	-0.106567	0.34484	0.147413	0.361933	0.340714	-0.0207723	-0.0554262	0.04	-0.15	0.00751092	0.296667	0.54906	0.342033	1.05019	-0.304613	0.146	0.006
Actn2	0.123296	1	0.259584	-0.442518	0.649093	-0.415037	0.499571	1.18133	0.515	-0.315	0.0687485	-0.146618	-0.0341511	-0.0535769	0.202576	-0.149077	-0.308635	0.130718	0.107531	0.137091	0.243543	-0.0436308	-0.0282887	-0.03	0.0266667	-0.0251265	0.126667	-0.0411251	-0.0542569	0.225203	-0.0765066	-1.015	-0.279
Actn3	0.192083	1	0.368314	-0.459432	-0.979069	1.63227	1.3203	2.38346	0.635	-0.57	0.133588	-0.0492323	0.0414037	0.20239	-0.0460424	-0.132975	-0.101506	0.0214064	0.117473	0.0313084	0.301775	-0.0258517	0.135617	-0.476667	-0.2	0.393066	0.213333	0.0314557	-0.0770653	-0.0393333	-0.00585437	-0.302	-0.326
Actn4	8.42689	1	0.0382023	-0.154495	-0.188162	-0.35931	0.230056	-1.17692	-0.315	0.6	0.249086	-0.0525358	-0.190039	-0.0347665	0.171596	-0.0979847	0.0302257	0.383481	0.301903	0.152963	0.105829	-0.102925	0.292752	-0.0233333	-0.00666667	0.00025247	0.02	0.178078	-0.034375	0.108711	0.0730915	0.042	0.243
Actr10	1.82623	1	-0.34177	-0.273149	-0.451955	-0.406187	0.215634	-0.869329	0.0154245	-0.168436	0.01536	-0.071636	-0.0542217	-0.159812	-0.145085	0.0622097	0.168399	0.0558111	0.110658	0.0891466	0.006713	-0.0786689	-0.267061	0.0433333	0.06	-0.0324124	0.03	-0.118143	0.0367804	0.22793	0.186719	0.055	0.326
Actr1a	2.81203	1	0.107235	-0.609445	0.278521	-0.507411	1.2314	0.472965	0.0586491	-0.432731	0.116264	0.0723531	0.0640012	-0.204036	-0.13081	0.168988	0.28087	-0.200919	-0.122629	0.260296	0.130843	-0.181001	0.564228	0.36	0.203333	0.145981	0.206667	0.379705	0.551999	0.314377	-0.00389137	-0.083	-0.465
Actr1b	1.39947	1	0.0998783	-0.0510158	-0.061524	0.35919	0.0796278	0.235719	-0.144146	0.0401894	0.21662	0.248871	0.304898	0.0886328	0.221812	0.223669	0.388287	-0.18728	-0.189402	0.367544	0.357471	-0.0243382	0.0880407	-0.0833333	-0.0533333	0.433826	0.196667	0.0533477	-0.186695	0.045183	-0.142336	0.118	0.071
Actr2	4.91597	1	-0.0751441	-1.00922	-0.425851	-0.534103	0.0712377	-0.0348893	-0.120785	1.398	0.151855	0.097005	-0.0834457	0.0152265	0.20265	0.105336	0.180971	-0.0437643	-0.000585295	0.0567054	-0.0327016	-0.157003	0.0842316	-0.223333	0.143333	-0.00979755	0	0.08067	0.0244152	-0.0104646	-0.0833952	-0.188	-0.053
Actr3	6.14317	0.967742		-0.182595	0.115888	-0.144899	0.820562	0.242784	-1.05821	0.503546	0.13962	0.0415438	-0.505516	0.0105667	0.0321957	0.0163202	0.129887	0.0648054	0.0406358	-0.0364537	0.0497361	-0.268469	0.0539966	-0.133333	0.116667	0.285051	0.273333	-0.111547	-0.0901774	0.0617458	-0.151981	-0.203	0.517
Actr3b	0.0887056	0.870968	0.449445	-0.332575	0.469485	-0.115477	0.401662	-3.13109	-0.08	-0.44	-0.153478	-0.0831625	0.0156673	0.0193086	-0.181091	-0.213337	-0.287949	0.0152999	0.0921573	0.0216745	0.239706	-0.0788654	0.0171378			0.321095	0.356667			1.69094	1.03984	-0.031	-0.323
Actr5	0.254418	0.870968	-0.530322	-0.325356	0.65711	-0.427433	-0.0983826	-0.219446	-0.102134	-0.424487	-0.291645	-0.0862374	-0.057809	-0.0258186	-0.105736	-0.0564636	0.000960402	-0.0932482	0.0228892	-0.122663	-0.127338	0.0812828	0.0470674			-0.276927	0.136667			-0.225876	-0.214968	0.129	-0.076
Actr6	0.527713	1	-0.868856	-0.281187	0.262924	-0.127696	0.48568	-0.801983	-1.945	-0.005	-0.0545321	0.406891	0.0431245	-0.114186	0.00664114	0.117671	0.240382	0.533127	0.70794	-0.0621452	-0.293158	-0.0667914	-0.142949	-0.05	0.0366667	0.032256	0.316667	-0.232407	-0.598333	0.0219607	-0.562758	-0.238	0.059
Actr8	1.07172	1	-0.360296	-0.269899	-0.353555	-0.338757	0.271398	0.04491	-0.98	0.435	-0.140232	-0.0279812	-0.166795	0.0119013	-0.159298	-0.0882916	0.0153543	-0.421483	-0.192098	-0.0476602	-0.00491131	0.139403	0.151965	0.18	-0.246667	0.0609986	-0.01	-0.0707746	0.0119319	-0.0577064	-0.0631208	0.269	0.315
Actrt1	0.105628	1	-0.471164	-0.12597	-2.53605	0.0418202	0.960592	0.501642	0.395	-0.205	-0.0831385	-0.221891	-0.00988708	-0.0126318	-0.22662	0.220893	0.190269	-0.0212752	-0.0134239	0.0841323	0.187769	-0.0601759	0.0875344	-0.126667	-0.0733333	0.109473	0.143333	-0.0955198	0.00610775	0.0524399	0.109162	1.526	2.056
Actrt2	0.117834	1	0.676052	0.823596	0.969626	1.10109	0.543935	-0.108288	0.2	-0.08	-0.0270199	-0.212182	0.0179291	0.151475	-0.133983	-0.342656	-0.167585	0.107175	-0.0299191	0.0424747	0.119433	0.0372499	-0.116337	-0.156667	-0.02	0.164764	0.0433333	-0.0432583	-0.0538092	0.105537	-0.0315926	0.214	-0.188
Actrt3	0.141597	0.870968	0.318922	0.233145	-0.40243	0.45043	1.35122	0.252486	0.803626	-0.346928	-0.00723804	-0.204412	0.071285	0.376225	-0.19641	-0.161166	-0.374321	0.0290014	-0.158915	0.0960282	0.0808159	-0.0234895	-0.00884951			0.175012	0.25			0.143179	-0.00147852	-0.649	-0.401
Acvr1	1.12819	1	1.1528	0.166167	-0.0690275	1.45302	1.07388	0.216206	-0.687891	0.130384	1.48165	1.68618	1.19044	0.285064	0.151102	0.0370682	0.255961	0.144038	0.275571	1.24044	1.1521	-0.0209732	-0.113513	-0.15	-0.243333	0.633976	0.63	1.39458	1.36497	0.532178	0.332634	0.165	0.462
Acvr1b	0.873255	1	-0.732782	-0.190904	-0.341845	-0.790018	0.528557	-0.287403	0.485263	-0.247118	-0.191565	0.00982396	0.059372	-0.0332488	0.149572	-0.229423	0.00209423	0.00139156	0.62853	0.332132	0.0620486	0.101952	0.494993	-0.22	0.72	-0.412613	0.15	0.112322	0.00253622	-0.2102	-0.0297494	0.201	0.2585
Acvr1c	0.162125	0.967742		-1.06443	-0.572741	0.856172	0.642076	-0.0745611	0.00579982	-0.104276	0.0721906	-0.0503959	0.0518574	0.0956694	0.00460628	0.0884972	-0.0312184	0.0882661	0.00745905	0.02145	0.155916	0.0823445	0.0332709	0.216667	0.01	0.0944028	-0.0133333	-0.0233977	0.021071	-0.0190767	-0.0378519	-0.5915	-1.305
Acvr2a	0.772011	1	-1.07531	-0.171293	-0.866878	-0.486673	0.076205	-0.918177	-1.29895	0.044267	-0.248286	-0.0073862	-0.166032	0.0302318	0.271088	-0.0373351	-0.139628	0.240538	0.320988	-0.381437	-0.419141	0.278992	0.124786	0.0766667	-0.09	-0.2304	-0.0933333	-0.102596	0.240001	-0.0731643	0.342618	-0.025	0.004
Acvr2b	0.490274	1	0.0545081	-0.239414	-0.81305	0.844024	0.617654	-0.376981	0.213818	-0.935192	-0.109719	0.108373	0.0671619	0.0484114	-0.237054	0.107053	-0.284029	0.0211457	0.0592873	0.0751145	0.15182	0.0590851	0.131802	-0.166667	-0.1	0.0461545	0.19	-0.115511	-0.00677425	-0.377136	-0.165765	0.244	0.642
Acvrl1	0.188498	1	0.512838	-0.244338	-0.335102	2.00817	0.370282	1.2397	0.0749849	-0.271727	0.0513639	-0.136569	0.00593375	0.279662	-0.185942	0.0237053	0.101419	0.0773248	-0.0630998	0.105851	0.0989004	-0.0570888	-0.0199496	-0.133333	0.04	0.190674	0.25	0.292514	0.0871256	0.181956	-0.0858881	0.063	-0.013
Acy1	0.514988	1	-0.811568	-0.185955	0.22348	-0.775778	0.294127	-0.360698	0.075	-2.135	-0.218805	0.201469	0.29987	-0.0818718	-0.0839128	0.146238	0.103172	-0.186059	-0.288774	-0.00242564	0.149601	-0.09387	-0.0756404	-0.01	-0.0266667	0.0364823	-0.21	-0.248581	-0.464602	-0.402671	-0.24205	-0.038	-0.168
Acy3	0.570641	1	-0.877216	0.9141	-0.204568	-0.962968	0.178706	-0.0661267	-0.195	-1.205	-0.096473	0.391741	-0.535529	-0.254432	-0.406294	-0.367118	-0.538465	0.0413314	0.040202	-0.124074	-0.253902	0.283569	0.389869	-0.183333	0.55	0.259673	-0.383333	0.202412	-0.258377	-0.874359	-0.117152	0.057	0.522
Acyp1	0.568021	1	-1.39025	-0.712579	-0.0086635	-0.564691	0.0694409	-0.549669	-0.310458	0.491111	-0.307286	-0.100362	-0.0657051	0.133394	-0.0313489	0.168393	0.159174	-0.17503	-0.00221059	-0.242935	0.0145629	0.022311	0.36381	-0.0366667	0.183333	-0.217453	0.00333333	0.0022388	-0.215975	0.333667	1.12108	-0.00075	0.1315
Acyp2	0.404535	1	-0.393719	-0.44382	0.222793	-1.17667	-0.116576	-0.551048	-0.665	0.28	-0.294894	-0.270158	0.194667	0.416506	0.146593	-0.084607	0.134727	-0.09599	-0.115041	-0.0321523	0.0625376	0.0123267	-0.0205055	0.09	-0.0766667	0.202429	-0.316667	-0.0998644	0.0354143	0.0730319	-1.09114	-0.2105	0.118
Ada	0.413463	1	0.131178	-0.387612	0.503805	0.174302	1.43786	1.582	-0.76	0.135	-0.12143	-0.227033	0.171374	0.276169	0.542129	0.30392	0.645111	-0.0843827	-0.66839	0.197798	0.142418	-0.35952	0.0191576	-0.116667	-0.263333	0.526169	-0.223333	0.347006	0.263183	0.661304	-0.605541	-0.128	0.225
Adad1	0.068602	0.967742	0.0320387	-2.92057	-0.271673	4.1964	-3.54844	-0.278052	0.13	-0.25	-0.0138831	-0.022724		0.170684	-0.134127	-0.230278	-0.016787	-0.0423816	0.0656693	0.00223989	0.0246995	-0.0361181	-0.0481315	0.273333	0.286667	-0.0501599	-0.06	-0.0504154	-0.0394668	0.00117338	0.0118514	0.0135	0.126
Adad2	0.176725	0.806452		-0.0296917	-0.0968615	0.0282337	0.890693	-0.534102	0.815	-0.475	-0.0806543	-0.22133		-0.0968276	-0.228683	-0.41497	-0.537967	-0.0847176	-0.11088	0.089431	0.0721069	-0.018685	-0.0440003			0.0841271	-0.00666667			-0.0688999	-0.328166	-0.558	0.681
Adal	0.348731	0.870968	-0.722378	-0.300406	-0.329032	-0.161939	0.434459	-1.13488	-1.33365	0.507399	-0.166018	0.128639	0.00939145	0.228282	0.326244	0.385194	0.197276	0.00265343	0.21809	-0.288524	-0.121282	-0.123738	-0.174253			-0.121855	-0.206667			-0.393721	-0.293049	0.276	0.746
Adam10	2.22437	1	0.26588	-0.214841	-0.103463	-0.234086	0.237716	-0.337064	-0.965748	0.0485497	0.294144	0.508532	0.135356	0.328295	0.664696	0.381825	0.459445	0.248582	0.236516	0.285288	0.222824	0.232244	0.104703	-0.0466667	0.103333	0.0712829	-0.14	0.274737	0.28701	-0.033772	0.0997505	0.069	0.861
Adam11	0.291267	1	0.366705	-0.637049	-0.18793	0.285421	0.889543	0.00434647	0.79465	-0.24866	-0.0557141	-0.317144	-0.0151777	-0.0632286	-0.209672	-0.0766173	-0.0972274	0.0647083	0.00191704	0.00309015	0.140276	0.04716	-0.0109188	0.243333	0.0366667	0.0391746	-0.0166667	0.123005	-0.038163	0.124298	-0.0440978	0.2245	-0.1175
Adam12	0.411196	1	2.69991	0.880588	3.86992	1.09511	2.24758	1.98354	-0.166607	-0.0381022	0.24757	0.010854	0.847839	0.203224	-0.253408	0.0469371	-0.282306	0.10372	-0.0263058	1.08475	0.974391	-0.0638387	0.317905	0.13	0.216667	0.868831	1.29667	0.866141	0.495657	1.63294	-1.27154	-0.4	-0.803333
Adam15	0.798995	1	0.202144	0.0984152	0.0747019	-0.397529	0.502678	0.73733	0.410055	-0.878041	0.225318	0.159445	-0.189577	0.0197771	-0.390981	-0.199506	-0.243303	-0.0605198	0.111447	0.235654	0.231966	0.118555	0.050042	0.0533333	0.0966667	0.72458	-0.09	0.267888	0.189063	0.257294	0.141266	0.136	0.349
Adam17	1.30093	0.967742		-0.356682	-0.0238861	-0.342493	0.0564721	-0.963755	-0.875289	0.228142	-0.240923	-0.133816	-0.311577	-0.125264	0.000663228	-0.16378	0.0130064	-0.702877	-0.670338	-0.382954	-0.261147	-0.126847	0.0707743	0.0966667	0.32	-0.618418	-0.3	-0.246063	-0.414009	0.0373459	0.62605	0.1725	0.35
Adam18	0.0430769	0.935484		-1.06413	-3.16993	-3.22882	0.947533	0.008725	0.025	0.155	-0.0138323	0.156693		-0.173818	0.00472639	-0.0077839	-0.0368892	-0.135324	-0.0505743	-0.110622	-0.0682284	-0.0632075	-0.0506401	0.0366667	-0.05	0.00259054	0.0866667	0.15	-0.113318	-0.201899	-0.19522	-0.076	0.163
Adam19	0.16601	1	0.31918	0.151436	-0.354262	-0.209598	0.804416	5.18532	0.69331	0.0734385	0.222644	-0.352477	0.19274	-0.108489	0.110796	-0.143151	-0.232016	0.279891	0.0248207	0.20405	0.1734	-0.0433204	0.00317074	-0.26	-0.0733333	0.0651509	2.25	0.160869	-0.051576	0.0822525	-0.0453808	-0.188	-0.004
Adam1a	0.179508	0.967742	-0.227675	0.602961	0.199508	0.332841	0.0555535	-0.239046	0.948382	0.248427	0.126993	0.259085		-0.287153	-0.358195	0.1001	0.180979	0.211523	0.0860027	-0.17594	-0.13174	0.147569	-0.0189095	0.193333	0.303333	-0.160544	-0.13	-0.0600164	0.116361	0.106867	-0.0420757	0.184	-0.19
Adam1b	0.225613	1	0.264041	0.564078	0.445038	0.538119	0.743523	-0.0702283	0.592351	-0.360454	-0.00662854	-0.290534	0.0624046	-0.0954652	0.0853013	-0.252544	-0.197645	0.221689	-0.0329266	0.109387	-0.0156308	-0.0713843	-0.00156087	0.0533333	0.0266667	0.0407464	-0.01	0.0596253	-0.0621673	0.0577017	-0.0624515	-1.096	0.024
Adam2	0.0748595	1	0.270264	-0.482152	1	-0.691878	-0.433349	0.0801917	0.24	-0.18	-0.100562	0.0322315	0.0609998	0.0100615	-0.00552441	-0.0639261	-0.281874	-0.0501398	0.0192356	-0.0250501	0.28301	-0.0457143	0.0058587	0.05	0.243333	0.097411	0.01	0.110228	-0.0502724	-0.0497141	-0.261262	0.186	0.171
Adam20	0.0458785	0.516129									0.0623003	0.0977382		-0.00494391	-0.330181	-0.427755	-0.361821	0.103971	0.0395684	0.264563	0.0726004	-0.142599	-0.0946379			-0.0418539	0.113333					1.018	0.364
Adam21	0.60564	1	0.209019	-0.791892	-0.746714	0.301656	-0.328623	-0.173423	0.375	-0.075	-0.172825	-0.251829	0.11533	0.245855	-0.280185	-0.233574	-0.152527	-0.171345	0.0433584	0.00724239	-0.0490915	-0.00363479	0.00472041	0.02	-0.123333	0.0062067	0.196667	0.181096	0.156064	-0.0232804	-0.133567	0.307	0.338
Adam22	0.0828795	1	0.238086	-0.813297	1.70274	-0.36451	1.21971	0.360929	0.895202	-0.000121277	0.0890367	-0.188046	0.0229269	0.0376691	-0.0293776	-0.192375	-0.229419	0.0317536	-0.0575378	-0.098064	0.175653	-0.502599	-0.0331246	0.103333	0.386667	0.09423	0.146667	-0.0163468	-0.0185742	-0.103027	-0.0986483	-0.513667	0.397333
Adam23	0.138022	1	-0.832651	0.290384	0.23644	-0.668982	0.235628	0.541076	0.0489443	-0.199063	-0.0705296	-0.223045	-0.0309846	0.0335089	0.362416	0.130255	-0.0239755	-0.0670338	-0.0613346	-0.539596	-0.454226	-0.115079	0.0386455	-0.06	-0.00666667	0.0062318	-0.00333333	-0.00162094	-0.127178	-0.383192	-0.174933	0.26075	-0.474
Adam24	0.277933	1	0.215996	1.2115	-0.331206	-1.56009	1.35755	-0.035645	0.55	-0.015	0.112824	0.010576	-0.0600168	0.184281	0.150248	-0.0320399	-0.0743944	-0.054889	-0.0903354	-0.14304	0.0745398	0.0388516	0.0294153	0.256667	0.273333	-0.0503373	0.08	0.038206	-0.0852028	0.0800023	-0.0348045	-0.287	-1.493
Adam25	0.0408488	0.967742	0.130377	-2.35364	2	-0.527247	5.67243	-0.0100633	-0.01	-0.245	-0.0760648	0.0687494	0.107581	-0.00275645	0.0683869	0.0498412	-0.0993724	-0.0500181	0.140811	-0.0935211	0.0203225	0.0325904	-2.16789e-05	0.08	0.156667	0.0191194		0.142036	0.0723987	-0.0523289	-0.0134952	0.756	0.491
Adam26a	0.0308476	1	-0.0678174	0.302563	1.86507	-1.05889	0.70044	-0.119275	0.21	-0.42	0.00535539	0.192107	0.0108624	0.0230674	-0.114312	-0.0711038	0.0578772	-0.046167	-0.141797	0.0946419	0.0297745	-0.0139722	-0.116211	-0.166667	0.103333	0.0231003	-0.0966667	0.0682247	0.0180145	-0.256426	-0.239795	-0.0475	-0.486
Adam26b	0.0227059	0.548387	-0.561082								-0.292099	0.0894906		-0.132914	-0.0707108	-0.0168395	0.0232887	-0.260095	-0.12343	0.159656	0.0250053	-0.370911	0.0611192			-0.0752126	0.00666667					0.087	-0.454
Adam28	0.145911	1	0.0635553	0.249762	-0.126039	0.643962	1.12902	-0.0683655	0.585009	-0.310156	0.0846086	-0.0144788	0.0352501	0.177362	-0.353006	-0.250582	-0.159825	0.017597	0.0271643	-0.0583462	0.385254	0.0735636	-0.0139828	0.156667	-0.0733333	0.0508556	0.163333	0.0853343	0.00662765	-0.0279581	0.0122408	0.3545	-0.4165
Adam29	0.0350582	0.580645	-0.0955664								-0.0713602	0.0897845	-0.0153025	0.109722	-0.169021	-0.082871	-0.0255067	-0.0100721	-0.0868285	-0.0539846	-0.0894218	-0.0304858	-0.0340859			0.105582	-0.0433333					0.745	0.964
Adam3	0.0762607	1	0.264844	0.0888093	1.51069	2.47947	0.669851	0.0475617	0.415	0.015	0.119753	-0.164711	0.0656358	-0.0377503	-0.174766	0.0813425	-0.12921	-0.0363173	-0.0087346	-0.140741	0.1486	-0.10893	-0.0432722	0.05	0.316667	0.140266	0.196667	-0.00764384	0.0426733	-0.0251191	0.0685457	0.066	-0.1185
Adam30	0.0753554	0.580645	0.0314733								-0.126775	0.151887	0.0915993	0.068511	-0.0634941	0.232679	-0.000374465	-0.0607636	-0.0814311	-0.0967823	0.0606223	0.127773	0.00229977			0.120636	-0.0233333					0.308	0.378
Adam32	0.0487735	0.870968	0.209855	0.169925	-1.28951	1.63743	1.55873	0.05548	-0.02	-0.235	-0.0258959	0.133653	-0.805522	0.195167	0.00657671	0.152438	-0.115829	0.0233483	-0.0630268	-0.060291	0.0183529	0.00616505	0.0164227			0.0298503	-0.0266667			0.212486	0.182615	-0.166	-0.079
Adam33	0.236808	1	0.382716	0.0622108	0.322989	0.56217	1.30106	0.377272	0.436882	-0.361173	0.0897231	-0.187831	-0.0475611	0.147888	-0.203064	-0.130826	-0.156688	0.0872034	0.0283369	0.00880358	0.0247832	0.00690819	0.0717213	0.0333333	-0.0566667	0.0612115	-0.07	0.127213	-0.0483602	0.171145	0.0628826	-0.218333	-0.298333
Adam34	0.0471251	0.935484	0.0834371	0.2367	-0.778644	0.525723	0.197446	-0.136682	0.865	0.31	0.0322873	0.00760455		-0.0382994	-0.239906	-0.0733436	-0.0542408	-0.00959865	0.0462765	-0.107224	0.0789286	0.0552809	0.0805386	-0.303333	0.183333	-0.0431145		-0.173068	-0.0313342	0.0152966	-0.0307547	-0.202	0.515
Adam39	0.0355443	0.548387									0.0400418	0.159542	-0.0194661	-0.302334	0.0832005	0.280384	-0.0109953	0.00162754	0.0473536	-0.113302	0.0622263	-0.0837883	-0.000403323			-0.0688966	-0.0933333					0.148	0.518
Adam4	0.140825	0.870968	-0.587731	-0.593299	-0.0612324	0.147133	0.618886	0.275598	0	-0.34	0.181579	-0.112102	-0.137143	0.330187	0.24641	-0.401148	0.0568295	0.242806	0.157964	-0.212899	-0.0941734	-0.00377473	0.0491037			0.00356301	0.0533333			-0.165747	-0.180475	-0.214	-0.521
Adam5	0.0676631	0.967742		-2.54689	-2.45317	2.38827	-2.15528	0.05017	0.24	-0.02	0.0966011	0.0569942	0.088165	0.0491182	-0.105799	-0.0553442	0.192194	0.0944628	0.0572846	0.0155421	-0.140191	0.00316615	0.182603	-0.213333	-0.0666667	-0.275341	-0.05	0.0697419	0.0872367	0.133174	0.196474	0.1155	0.3325
Adam6a	0.0447893	0.870968	-0.13566	-0.417853	2.31194	0.222392	0.847997	0.081705	0.13	0.09	0.146468	0.0123507	0.0154219	0.107914	-0.0660232	-0.0429928	0.0907218	0.00572493	-0.0479129	0.0281143	0.00516048	0.117827	0.0469926			-0.0984176	-0.02			-0.0145346	-0.0917984	-0.646	0.19
Adam6b	0.0305154	0.806452	0.468421	-0.602036	-0.447459	-0.777608	-0.678072	-0.56929	0.77	-0.405	-0.0339421	-0.185399		-0.184057	0.0382567	-0.0185119	0.00929181	-0.0264409	-0.0410211	0.098538	0.0367677	0.000474037	0.0396983			-0.0227146				-0.125644	-0.100077	0.045	0.238
Adam7	0.103488	1	0.195229	-1.92785	1.85361	0.469485	-0.874469	0.157033	1.13	0.035	-0.0680334	-0.125691	0.115099	0.0329505	-0.15849	-0.275106	0.0692073	-0.123234	-0.0292619	0.0486875	0.000580821	0.0687092	-0.0117009	0.196667	-0.0933333	0.0118346	0.0733333	0.0940388	0.0137019	0.097405	-0.161902	-0.519	0.141
Adam8	0.746584	1	1.28075	-0.420167	-0.232611	0.723341	-0.166754	3.1108	-1.26	-0.225	1.8562	1.56342	0.216981	0.811164	0.162388	0.961063	0.0407284	0.339985	-0.0516204	1.27672	1.46098	-0.328529	-0.954463	-0.07	-0.176667	-0.926892	-0.356667	0.997755	0.912346	-0.922434	-2.46036	0.428	-0.985
Adam9	3.97979	1	-0.30389	-0.259684	-0.443768	-0.524463	0.247367	-1.32143	-1.81	0.71	0.205843	0.407307	-0.209905	0.0620911	-0.0604564	-0.0374155	-0.100126	2.11456	2.21191	-0.11693	-0.209622	-0.0565843	-0.196005	0.0466667	0.04	-0.427557	0.05	-0.541625	0.127418	0.358936	0.528251	0.089	0.176
Adamdec1	0.103585	1	0.167133	-0.0938082	-0.960316	1.5639	0.159576	1.4074	0.665	-0.25	0.0528008	0.0438085	-0.0528294	-0.0173035	0.054439	-0.151951	0.185657	-0.0695316	0.00173488	-0.0466923	0.0898602	0.0477704	0.135003	0.183333	0.246667	-0.0342181	-0.06	0.103849	0.0339041	-0.0909767	-0.032968	-0.3025	-0.1115
Adamts1	0.863051	1	-0.695916	-0.612365	-2.23113	-1.23096	-1.67572	1.57677	-1.56	-0.3	-0.130968	-0.573839	-0.0239252	0.213031	1.09726	-0.174139	0.479351	0.193592	0.156857	-0.30719	-0.471429	-0.181492	-0.081196	-0.0566667	0.103333	-0.782231	-0.443333	0.0795422	-0.0275959	0.213006	2.56226	-0.738	-0.783
Adamts10	0.346916	0.967742	-0.0628907	-0.378734	1.54759	-0.141214	0.780662	0.283852	0.529985	0.218074	0.321306	-0.00991998		0.0622131	0.00651624	-0.295752	0.0121459	-0.105456	-0.225584	0.00732254	-0.0151364	0.057124	0.0705723	0.193333	-0.05	0.173269	0.4	0.143028	-0.0875702	0.318514	0.213195	0.342	0.1225
Adamts12	0.107217	0.870968	0.626171	0.209558	-0.0821129	3.00152	0.590549	1.3967	0.010078	-0.132172	0.0155039	-0.123632	0.0026113	-0.0511469	0.0121638	-0.0551814	-0.267062	0.0428718	0.131583	0.240003	0.197375	0.0588317	-0.00410818			0.094805	0.456667			0.690721	0.504139	0.2785	0.577
Adamts13	0.146852	0.580645	0.344912								0.0946894	-0.299449	0.0799971	0.158892	-0.0290069	-0.111552	-0.296833	0.25814	-0.00989839	-0.0380562	0.0743315	0.516648	-0.0672796			0.0746697	0.01					0.2505	-0.2125
Adamts14	0.488207	0.516129									0.0121612	-0.230321		0.0154755	-0.425412	-0.243586	-0.94088	-0.0128688	-0.034645	0.103899	0.171523	0.0618932	-0.0257643			-0.468566	2.15					0.3535	0.601
Adamts15	0.177607	0.967742		-0.112475	0.309783	-0.311944	-0.324022	-0.1142	0.355	0.39	0.0676264	-0.168064	-1.28655	0.1507	0.0735095	-0.286918	-0.370763	0.105366	-0.124719	-0.5529	-0.478466	-0.0139225	0.062135	0.203333	-0.0633333	-0.138618	0.11	-0.161399	0.166915	-0.273506	0.601867	-0.16	-0.077
Adamts16	0.150737	0.870968	0.454343	-0.758664	-0.976758	-0.0944321	1.82825	1.5121	0.933833	0.00799797	0.23632	-0.227043	0.3821	-0.0922176	-0.216087	0.00514301	-0.334989	0.230538	0.710626	0.296914	0.310804	0.0835901	0.0466185			-0.0590172	0.193333			0.754298	-0.103328	0.0445	0.148
Adamts17	0.241412	0.548387									0.0850797	-0.141751	-0.0141965	0.0504904	0.0518254	0.103743	0.0269871	0.0204195	-0.00863494	0.0721306	0.0653164	-0.0441011	0.0241663			0.0465835	0.156667					0.2045	0.114
Adamts18	0.0982226	0.870968	0.302364	0.209056	0.43533	-0.220235	0.0476148	-0.142909	0.291982	0.0391654	-0.114407	-0.164794	-0.170525	0.249452	0.14805	-0.0334748	-0.182382	0.0161958	0.05987	-0.0619028	0.0551245	0.168768	0.0134949			0.0475633	0.0433333			0.0563233	-0.0793469	-0.5285	-0.178
Adamts19	0.0728695	0.870968	0.258426	-0.237039	-0.547488	-0.485427	0.710493	-0.00306167	0.13	-0.18	0.246606	-0.0567115	0.0612731	0.129025	-0.483361	-0.00433951	-0.194378	0.11132	-0.131651	0.208422	0.122987	0.0168325	-0.0690171			0.0976004	0.106667			-0.112293	0.0158874	0.343	0.381
Adamts2	0.214833	0.870968	0.241246	-0.763742	0.113891	0.520033	-0.437739	2.41538	0.340735	-0.0184451	0.119047	-0.212289	-0.0181403	0.195065	-0.106737	-0.00409937	-0.186863	0.128325	-0.164588	0.099833	0.0639019	-0.00859067	0.0161126			-0.0165604	-0.0466667			1.66263	2.57581	0.021	0.099
Adamts20	0.0691775	0.870968	0.44782	-2.07039	-0.521953	-1.72247	0.415037	0.446025	-0.1	0.075	0.117494	-0.174057	-0.076124	-0.0200619	0.0578985	-0.156703	-0.407192	0.259529	0.0364138	0.138728	0.114511	-0.0284982	-0.0666259			0.0303725	-0.0533333			0.110188	0.0378022	-0.547	-0.215
Adamts3	0.0787964	0.83871		-0.110991	0.853637	0.875784	-0.407031	-1.58235	0.373127	-0.532839	-0.0158731	-0.112421	-0.0482711	0.0713751	0.655514	0.0961984	-0.0421492	0.0295008	-0.0207892	0.0431321	0.119884	-0.0314933	0.0372737			0.0287777	0.0166667			0.0625292	0.028144	-0.1345	0.067
Adamts4	0.50372	1	0.657363	1.2443	-0.887871	-0.182935	1.39059	1.31671	0.139581	-0.345168	1.54997	0.139327	0.147853	-0.0413233	-0.034505	-0.263353	-0.415772	-0.0558959	-0.805964	0.277522	0.539671	-0.140974	0.0127641	-0.35	-0.213333	1.13402	2.85667	0.272183	0.189507	0.896157	0.215075	-0.7425	1.116
Adamts5	0.419372	1	0.440313	-1.31144	-0.604523	-1.72491	-0.18823	0.710991	0.0729281	-0.493962	0.0910158	-0.0498894	-0.277879	0.506792	0.769765	-0.266984	0.0451092	0.045843	-0.015857	0.213451	0.167206	0.144062	-0.119892	-0.0266667	-0.11	-0.0118207	-2.37	0.0372517	0.0940989	1.98648	2.81311	0.1335	0.0235
Adamts6	0.249994	0.806452		-0.60949	0.177213	3.73597	0.972437	1.74209	-0.29334	0.862652	2.29135	2.31943		-0.367683	0.123659	0.0688056	0.0655747	-0.0107681	0.87774	1.46193	1.43072	0.258818	-0.447854			1.25375	2.77667			1.62552	0.923877	0.936	0.81
Adamts7	0.298158	1	1.64069	0.0102683	2.28735	0.483535	0.698619	1.64276	-0.035	-0.02	0.452608	-0.107092	0.928145	0.338064	0.280224	-0.0602531	-0.261038	0.196411	0.22943	0.95032	0.866913	-0.056445	0.0412293	0.0966667	-0.203333	0.353763	1.95	0.0520955	-0.156407	1.55397	1.40354	-0.059	1.892
Adamts8	0.259637	1	0.446576	-0.554119	2.2878	-1.30406	-0.70044	0.296763	0.475	0.2	0.0294994	-0.319314	-0.0360038	0.0288383	-0.307658	0.0205915	-0.243845	0.0414084	-0.0429555	0.0834691	0.16553	0.0343949	0.0446841	0.19	0.19	0.176766	0.32	0.0888463	0.0382595	0.216397	0.0259573	0.343	-0.324
Adamts9	0.231341	0.806452		1.49378	-0.0746892	-1.16172	-0.870335	0.960527	0.43452	-0.158585	-0.0603565	-0.219067		0.551351	1.28851	0.180638	0.926769	0.096334	-0.0127954	-0.738441	-0.689778	0.439486	0.694074			0.0247223	-1.90667			-0.265926	-0.0922616	0.3215	3.062
Adamtsl1	0.0963024	0.83871	0.30223	1.26723	0.00517251	-1.68059	1.74005	1.49263	0.623836	0.275187	0.0401165	-0.17318		-0.0488454	-0.0486468	-0.0855064	-0.0954438	0.17517	-0.059648	-0.0477472	0.0603754	-0.0779079	-0.0680252			-0.0500521	0.07			-0.0438156	-0.000315976	-0.0646667	-0.097
Adamtsl2	0.158324	0.870968	0.357263	-0.351472	-0.0919225	-0.701776	0.92785	0.0283833	0.92	-0.07	0.141027	0.00831015	0.00609946	0.172943	-0.258421	0.01011	-0.104446	0.240518	-0.118798	0.315288	0.348223	0.0575563	0.0262535			0.0319667	0.16			-0.0409441	-0.121193	0.009	0.379
Adamtsl3	0.202192	0.774194		0.291176	0.648771	0.892715	0.644594	-0.775775	0.2	-0.15	0.0515282	-0.00263819		0.0978299	-0.243584	-0.165191	-0.124551	0.0823949	-0.0704773	0.548317	0.322615		-0.0266119			0.752529	1.22			2.79945	2.62732	0.579	0.88
Adamtsl4	0.588222	1	-0.359749	0.0530771	-0.864202	-2.03391	0.098286	1.02472	-0.1	-0.48	0.328361	0.36483	-1.32423	0.0322174	-1.05292	0.0811334	-0.698762	-0.0326956	-0.67633	-0.261942	-0.30234	0.0618314	0.215361	-0.01	0.163333	-0.405877	-1.62	-0.0869648	-0.229393	0.479806	2.222	0.047	0.503
Adamtsl5	0.447809	1	-0.728144	-0.161816	-0.164447	-0.279097	0.568049	2.12213	1.06	-0.35	-0.152831	0.184345	0.091151	0.086312	-0.0339868	0.42465	-0.0470462	-0.0796366	-0.117209	-0.171922	-0.140774	0.296813	-0.0493821	-0.12	0.26	0.375022	0.263333	-0.103876	-0.106719	-0.431558	-0.104591	0.081	0.358
Adap1	0.35732	0.870968	-2.09003	0.208502	0.311708	-2.12347	0.248123	0.339557	1.215	-0.325	-2.26734	-1.64774	-0.702615	-0.029756	-0.0651515	-0.149497	-0.239339	0.280266	0.169545	-1.47757	-1.73727	-0.0523465	0.0332021			-0.00561038	-0.77			-0.445349	-0.0802593	-0.022	-0.111
Adap2	0.112205	1	0.340758	-0.84718	0.572194	0.858031	0.969626	1.86993	0.45825	0.113105	-0.0502804	-0.276112	-0.108929	-0.192572	0.0170571	-0.172673	-0.145205	-0.0549342	0.0706511	-0.0398338	0.104806	-0.010426	0.250395	0.193333	0.24	0.0501805	0.153333	0.0735881	-0.0770048	-0.00371408	-0.238985	0.153	-0.38
Adar	1.05809	1	-0.210888	-0.228154	-0.426555	-0.387774	0.118316	-0.718041	0.402766	0.0637631	0.0485368	0.224879	-0.190952	0.13202	0.0784901	-0.0462246	0.077139	-0.538028	-0.280127	0.295703	0.0703631	0.448015	-0.671011	-0.0233333	-0.2	0.0798873	-0.453333	0.208778	-0.310736	-0.14781	-0.178722	0.1175	-0.1135
Adarb1	0.495188	1	1.87161	-0.206408	0.440515	0.301449	1.56837	0.694577	0.44228	-0.266825	1.00026	1.18527	1.36255	-0.0173743	-0.302148	-0.0368818	-0.354519	0.162944	0.433774	1.66697	1.63777	0.429382	0.22449	-0.11	-0.383333	1.75632	1.30667	0.478208	0.208084	0.328004	-0.169919	-0.197	-0.374
Adarb2	0.441253	1	0.432679	-0.707803	0.885941	2.10883	0.224763	-0.08407	0.522019	-0.17695	-0.0830811	0.0640243	-0.141971	-0.105166	-0.0440044	-0.203337	-0.336082	-0.133725	0.0633478	-0.0185066	0.156941	-0.0749621	0.0115123	0.14	0.0233333	0.0350401	-0.01	0.269164	0.0614119	-0.0031985	-0.101364	-1.727	-2.111
Adat1	0.226587	1	-0.954119	-0.578565	-0.705628	-0.429212	0.26464	-0.463114	0.0900293	0.00852431	0.2563	-0.0767956	0.111588	-0.123921	0.0201824	0.140935	-0.148126	-0.185378	-0.237788	-0.384617	-0.478742	-0.328629	-0.132014	-0.226667	0.25	0.00293517	0.333333	-0.0720552	-0.160355	-0.0240884	-0.211256	0.00166667	-0.212667
Adat2	1.02418	1	-0.354979	-0.286539	0.473377	-0.212023	0.212072	-1.23581	1	0.54	-0.423847	-0.442972	0.457112	0.080566	0.0877484	-0.200198	0.0223069	0.13486	-0.0118883	-0.0236127	0.118844	-0.287539	-0.333308	-0.156667	0.283333	-0.302471	0.226667	-0.170239	0.00634966	0.167121	-0.293589	-0.056	-0.701
Adat3	0.796537	0.387097		-0.0708367	0.0966982	-0.240906	0.382537	0.06699	0.335	-1.085																	-0.06			-0.0284073	-0.463813	-0.181	-0.734
Adck1	0.509161	1	-0.290039	-0.302892	0.265165	-0.347963	0.381416	-1.58976	0.335	-1.78	-0.0307897	0.0454319	-0.00660925	0.081728	0.103105	-0.0117475	0.161228	0.0544773	0.123574	0.0567363	0.0860417	-0.398394	0.14069	-0.283333	-0.193333	0.176393	0.0766667	0.0271446	-0.100626	0.157164	0.483921	-0.281	0.215
Adck2	0.205908	0.870968	-0.138311	-0.18277	-0.646201	0.688592	-0.0202551	-0.165885	0.791351	-1.05304	0.114327	0.0046824	-0.02964	-0.00227214	0.0410455	-0.0311368	0.0346591	-0.396608	-0.399159	-0.039661	0.0489828	0.164628	0.335885			-0.124839	-0.213333			-0.0324113	0.359911	-0.108	-0.755
Adck3	0.36116	1	-0.00419613	-0.344932	-0.85287	0.56584	0.0237003	0.169925	0.599516	-0.23611	0.142125	-0.145891	-0.102313	0.0761936	-0.199675	-0.0102523	-0.308423	0.037945	-0.263047	-0.0478231	-0.0699079	0.273435	0.543331	-0.04	0.00666667	-0.0817562	-0.32	-0.00935745	-0.00688278	0.150244	0.198142	-0.8875	-0.1175
Adck4	0.739458	1	-0.121157	-0.596382	-0.0967532	-0.749654	0.227533	0.58699	-0.155	-1.495	0.234164	1.03157	-0.534016	0.0504423	0.0273749	0.114712	0.407413	-0.227591	-0.0791815	0.368484	0.455356	0.207522	0.564117	0.14	0.0833333	0.0280232	-0.283333	-0.194401	0.249376	-1.3946	-0.168188	-0.064	-0.527
Adck5	0.62879	0.870968	-0.270929	-0.28829	-0.290196	0.0487501	-0.0723634	-0.468975	0.565	-1.05	-0.0536986	-0.207376	-0.0648926	0.126889	-0.0313425	-0.307911	-0.0217388	0.259651	0.0933452	-0.0943673	0.0248713	0.0753426	0.185988			0.142922	0.173333			-0.109821	0.726704	-0.264	-0.38
Adcy1	0.221584	0.83871		0.370943	1.35821	0.863677	2.12132	-1.39469	0.452762	-0.092976	0.112416	-0.432589	-0.178382	-0.0462947	-0.592295	-0.346509	-0.690831	0.191777	-0.0594161	0.143757	0.0779914	0.164568	-0.0540729			0.21064	0.14			-0.189719	-0.35634	0.422	1.689
Adcy10	0.0539367	0.870968	0.280164	-0.696324	0.274394	0.509014	0.464963	0.07886	0.475	0.205	-0.0892584	0.0498235	0.0320004	0.0949034	-0.25178	-0.034229	-0.171593	0.0359036	0.201245	0.144796	0.00830283	0.045565	-0.0172064			-0.0430876	-0.0333333			-0.156299	-0.369146	0.397667	0.334
Adcy2	0.412968	1	0.0935914	-0.352371	0.346895	-0.376376	0.66059	0.7301	0.715	-0.475	0.0326438	-0.0830888	0.0135874	-0.126521	-0.0619303	-0.22498	-0.0637011	0.0756209	-0.127584	0.151926	0.114705	0.00307353	0.132053	-0.09	-0.0633333	0.119167	0.9	0.0541893	-0.0662374	0.140208	-0.138214	0.103	-0.373
Adcy3	0.282505	0.967742	0.303254	-0.703788	0.101719	-0.089798	0.335824	1.47566	0.882435	0.0375757	0.258732	-0.120163		-0.132636	0.271459	-0.107655	-0.117699	0.116541	-0.274674	0.109746	0.320694	0.0853421	-0.0101887	-0.106667	-0.0666667	-0.111625	-0.173333	0.0309268	-0.0955697	0.000399889	-0.0986257	0.444	0.845
Adcy4	0.419674	1	0.0183248	1.12711	0.109624	0.255257	1.62803	0.578845	0.55	0.08	-0.0758805	-0.424338	0.0383671	0.0424403	0.0390624	-0.14803	-0.28228	0.0265457	-0.00678366	0.0433078	0.0641864	-0.100207	-0.0621004	0.0533333	-0.11	0.0734692	0.163333	-0.0825642	-0.14225	-0.129434	-0.218629	0.086	0.039
Adcy5	0.114005	0.870968	0.410872	0.011684	0.0585069	1.22538	0.187907	0.0701725	0.430462	-0.2447	-0.15059	-0.0274275	-0.141141	0.00569804	-0.324888	-0.0577743	-0.372011	0.0314604	0.0665127	0.126051	0.145492	0.135898	0.0596755			0.1264	0.06			-0.0212201	-0.0253399	0.115667	0.444667
Adcy6	1.0437	1	-0.528587	-0.320043	-0.382814	-0.374805	0.291063	-0.011825	-1.14	-0.755	-0.0641118	-0.102102	-0.154041	-0.140742	-0.198076	-0.311382	-0.201003	-0.241643	0.0351156	-0.27951	-0.263217	0.451877	0.467923	0.19	0.08	0.244543	0.03	-0.198451	-0.0412506	-0.501205	0.348761	0.004	0.007
Adcy7	0.41145	1	0.575281	-0.0799006	1.59702	-0.277646	0.599273	0.726776	-0.180469	0.0031592	0.824368	1.37784	0.0432508	0.123219	0.692669	-0.427789	0.704445	0.287411	0.104748	0.468821	0.529072	-0.0746379	-0.0391915	-0.04	0.0833333	1.05023	0.616667	0.118337	0.0683994	2.41211	1.6335	-0.019	0.457
Adcy8	0.172349	1	0.20687	0.913585	1.90689	0.70044	1.91045	-0.371805	0.485	0.005	0.0850429	-0.029077	0.347174	0.00607902	0.0336849	-0.0780859	0.0173639	-0.139153	-0.157903	0.176481	0.0758965	-0.0618566	0.0491225	0.05	-0.103333	0.0124623	-0.12	0.0600595	0.084915	0.0196731	-0.10545	-0.112	0.504
Adcy9	0.442784	1	-1.18665	-0.305385	-0.897714	-1.07771	-0.05908	-1.67029	-1.00641	-0.119166	0.117687	0.82465	-0.20615	0.113013	-0.162636	-0.0648939	-0.117543	0.0543436	-0.427516	0.461519	0.334486	0.212089	-0.242718	-0.286667	0.0333333	-0.220276	-0.39	0.379503	1.02896	-0.98827	0.875375	-0.129	-0.265
Adcyap1	0.132147	1	0.389334	-1.45689	0.533219	0.853387	0.770754	-0.173135	0.686622	0.291786	0.104223	-0.22299	-0.0576241	0.0861351	-0.0644154	-0.213687	-0.18821	0.0987685	-0.0121844	-0.0113539	0.313441	-0.0453289	-0.00458271	0.123333	0.146667	0.0621565	0.1	0.189773	0.0763822	0.0505859	-0.0546844	0.315	-0.817
Adcyap1r1	0.221365	1	0.618759	-0.149468	0.168846	-0.287399	1.2734	0.413453	0.806991	-0.115665	0.141264	-0.320048	0.0319443	0.0527616	-0.110176	-0.0926341	-0.41815	0.174641	-0.136207	0.0624838	0.128502	-0.0577067	0.0219412	-0.0333333	0.0533333	0.156187	0.103333	0.0943305	0.0606181	0.122478	-0.0176336	0.233	0.355
Add1	2.1088	1	0.225079	-0.0251778	-0.131299	-0.193458	0.351217	0.724249	-1.37749	-0.644858	0.404776	0.666991	-0.124487	-0.0416837	0.0571244	-0.0769459	-0.112739	0.466658	0.249855	0.396974	0.34778	0.0625185	0.32796	-0.0766667	0.01	-0.111063	-0.13	0.220064	0.195898	0.14047	0.573097	0.0595	0.2675
Add2	0.48656	1	0.557028	-0.507031	0.168712	0.992341	1.29997	2.36357	-0.946273	-1.09829	1.09268	1.8747	0.121861	0.243542	-0.0779544	-0.0669902	0.153566	-0.842647	-0.403079	1.10206	1.21661	-0.00235013	-0.0912709	-0.01	0.0366667	1.05451	1.61	0.409021	0.314006	0.10508	0.783053	0.104	0.223
Add3	0.899593	1	-1.76247	-0.111442	-0.973977	-0.625864	0.458462	-1.09908	-0.571659	-0.371546	-1.38719	-1.26645	-1.19596	-0.129401	0.147694	-0.14354	0.121003	-0.0893374	0.0954592	-0.836926	-1.06057	0.259303	-0.121467	-0.07	0.00333333	-0.382646	-0.8	-0.631389	-0.736947	-1.27815	-0.732499	-0.001	-0.156
Adgb	0.0311959	0.741935	0.12885	-0.125531	0	0.584963	-0.0931094	-0.190745	-0.085	0.145	0.00138617	-0.166222	-0.0367615	0.161825	0.0324343	-0.0659839	0.0292926	-0.00363765	0.0184818	0.0258784	0.00791615		-0.0194449			0.0603504				-0.0356846	-0.101999
Adgra1	0.478039	0.870968	2.37665	-0.856353	-0.339206	0.514451	3.22746	-0.0250643	0.182323	-0.224749	1.84493	2.60168	0.555751	0.0649166	-0.199546	-0.0635923	-0.286089	0.0232972	0.619457	3.29321	3.04133	-0.287242	0.00938739			2.14575	2.27667			0.786464	-0.384193	-0.3675	-0.0715
Adgra2	0.288455	1	-0.0523792	0.231326	0.699012	-1.60204	-0.796467	5.06399	-0.185	-0.47	0.291342	0.00402908	-0.0351912	0.0573167	-0.0345071	-0.194623	-0.461984	0.109347	-0.160895	-0.176945	-0.0680657	-0.102954	-0.802977	-0.16	0.253333	0.652665	1.01333	-0.199546	-0.149281	-0.585107	-0.97884	0.092	2.178
Adgra3	1.54901	0.935484		0.33167	-0.308698	0.408952	0.983759	-0.523753	-0.212334	0.0289352	0.538807	0.45353		-0.201984	0.191903	-0.292112	-0.0662422	0.263718	0.238473	0.224234	0.106803	0.0493079	0.219889	-0.296667	-0.25	0.174112	0.08	0.341129	0.352918	0.0468851	-0.179771	0.2865	0.2025
Adgrb1	0.246599	1	0.386446	0	0.223775	-0.156969	1.29235	-0.25717	0.815	-0.445	0.221919	-0.224338	-0.0637893	0.0535638	-0.154868	-0.0687508	-0.150544	0.218525	-0.0971669	0.040993	0.0735349	-0.0931625	-0.0422429	-0.0833333	0.14	-0.0483223	0.05	0.108849	-0.0596815	-0.0148039	-0.07864	0.1075	-0.4565
Adgrb2	0.208478	0.870968	0.501655	-1.9386	-0.495553	-0.81697	1.91194	0.159958	-1.365	-0.83	0.390506	0.144442	0.188534	0.191984	0.0244993	-0.137599	0.107414	0.428185	-0.103446	0.606822	0.623819	0.0251381	0.0171262			0.0706785	0.06			-0.408648	-0.495936	0.0975	0.0115
Adgrb3	0.0389587	0.870968	0.163929	-0.206451	1.06711	2.1822	0	0.170978	0.265	-0.45	-0.0894979	-0.0360637	-0.00902026	0.297414	-0.175737	-0.091301	-0.158665	-0.0897363	-0.134093	0.0678204	0.210844	-0.0847693	-0.264725			-0.151166	0.0433333			0.0637401	0.0427703	-0.0675	-0.4275
Adgrd1	0.178445	0.967742		-0.321928	1.26303	1.30256	-0.843274	1.57181	0.33	-0.51	-0.0261052	-0.264456	0.0855522	0.225599	-0.0271032	0.254532	-0.396177	0.100562	0.0118268	0.0334593	0.133572	-0.0512244	-0.00632312	-0.12	-0.216667	0.0999454	0.0933333	0.143651	0.113706	-0.201936	-0.164077	0.217	0.501
Adgre1	0.129105	1	0.0269589	0.620991	0.537808	-0.944677	0.330033	3.36379	0.465	-0.165	-0.0960131	-0.0755258	0.0276614	-0.732518	0.984785	-0.238313	0.573691	-0.0706668	0.0644498	-0.0930521	0.149371	0.00549174	0.0214522	0.0633333	-0.313333	0.00784086	0.0366667	0.18964	0.126672	-0.13403	-0.145818	0.0465	0.095
Adgre4	0.110905	1	0.254307	0.179932	0.197939	0.694144	0.683853	0.589112	0.407475	-0.139426	-0.0884399	0.103424	-0.0259485	-0.649669	0.7804	0.0467118	0.209665	0.0295427	0.0343608	0.00898269	0.0870463	0.0462307	-0.0232179	-0.176667	-0.216667	0.00593602	-0.07	0.0836813	0.0653256	0.0421636	0.0898103	-0.003	-0.554
Adgre5	1.79264	1	-0.0873185	0.257388	-0.0696735	-0.0100105	0.234752	0.55466	0.515	0.175	0.69827	0.925745	0.158957	-0.079336	0.862326	0.366734	0.244211	-0.650304	-0.601193	0.414878	0.223326	0.0254158	0.172945	0	0.11	1.47281	-0.456667	0.41	0.483314	-0.582146	0.169531	0.305	1.543
Adgrf1	0.0507979	1	0.404763	0.671377	-0.36257	-0.229482	-2.87101	0.169453	-0.035	-0.305	0.0133138	-0.114113	0.0797812	-0.0192918	0.46616	-0.0366871	0.0444435	-0.140244	-0.144558	-0.192663	0.257288	-0.0490289	0.0257067	-0.116667	-0.616667	0.0146704	-0.0166667	0.104514	0.0489671	0.2565	0.222732	-0.098	0.479
Adgrf2	0.379409	0.548387									0.00595328	-0.117725	0.0124976	-0.0750448	-0.711498	-0.069223	0.268872	0.040121	-0.0163718	0.101822	0.251101	0.0416093	0.0136263			-0.0262527	0.07					-0.019	0.038
Adgrf3	0.104818	0.580645	0.318493								-0.246399	0.0386351	0.00590749	0.0882127	0.174834	0.0554798	-0.276605	0.181316	0.00860209	-0.137411	0.198906	0.178264	-0.0270328			0.00377131	0.146667					-1.024	0.18
Adgrf4	0.305565	0.83871	-0.19412	0.761213	0.621488	-0.785875	-3.26679	-0.26798	-0.04	-0.18	0.12028	0.860359		0.303833	-0.502257	0.0759141	0.543873	-0.0422142	0.0285704	0.561362	0.287248	-0.592359	0.0509226			0.0182171	0.01			0.0292593	-0.036231	0.009	-0.179
Adgrf5	0.164609	0.806452		3.13241	-1.20829	-0.341229	2.11618	1.78716	0.305702	0.148006	0.47012	0.280955		0.363728	-0.131418	0.112276	-0.147902	-0.271146	-0.466473	-0.119131	-0.0843318	0.729845	-0.100994			-0.504715	0.326667			-0.0313774	0.0883605	0.123	0.701
Adgrg1	2.23527	1	0.938038	-0.679959	-0.943243	0.847422	0.458452	-0.702374	0.487866	-0.367393	0.941625	0.922844	0.0912291	-0.191671	0.551171	-0.126235	0.208434	0.112129	-0.2718	0.597621	0.773761	-0.113268	0.228021	0.0333333	0.2	2.40462	-0.27	0.523134	1.25895	0.182766	0.0329351	-0.065	0.18
Adgrg2	0.335021	0.870968	-1.05588	0.55141	0.967839	-0.152003	0.135506	-0.847029	-0.507377	-0.0700985	0.0131462	0.101728	-0.247081	-0.328174	-1.11696	-0.216175	-0.689956	-0.0968364	-0.0981464	-0.557147	-0.531408	-0.0234766	-0.110236			0.41534	0.0466667			1.36398	1.56462	-0.575	0.215
Adgrg3	0.220778	1	0.711183	-0.624133	0.15029	0.887525	-0.0197826	-3.24473	0.835	0.63	1.14414	0.544522	0.0469712	-0.0473941	-0.16229	-0.708349	-0.274294	0.397379	-0.0591888	0.136416	0.0363879	-0.056467	-0.0433844	0.00666667	0.386667	0.285423	0.19	0.0730589	-0.111955	0.167229	-0.432037	-0.35	0.377
Adgrg4	0.0726461	0.548387									-0.0172472	-0.0245695	-0.12989	0.0706108	-0.344436	-0.0566157	-0.124727	0.00572255	-0.026255	0.0344655	0.0503492	-0.0511163	-0.00701502			-0.0426781	0.0333333					-0.0115	1.4375
Adgrg5	0.133761	0.83871		-0.275634	-0.889488	1.84395	-1.96111	0.680455	0.835	0.22	0.0356667	0.013106	-1.18381	0.160451	0.0458843	0.102009	-0.0912182	0.00630705	-0.228369	0.12914	-0.0326565	-0.00802449	-0.0156602			1.01076	0.353333			0.197102	0.0452666	0.096	1.246
Adgrg6	1.46477	0.83871	-0.400816	1.37746	0.0378483	-0.487506	-0.0458741	-0.501051	-0.892309	-0.349864	0.0977271	0.0758507		0.0628059	0.359115	-0.0437395	-0.479852	0.365842	0.199092	-0.932529	-0.967169	-0.0922011	-0.394513			0.725901	-0.756667			1.31542	2.51861	-1.035	0.288
Adgrg7	0.0881744	0.580645	0.0184621								-0.0397079	-0.213772	0.0671564	0.650145	0.255681	0.429454	1.45784	0.045822	0.0576086	-0.058201	0.109741	-0.0169522	0.0060403			-0.0386532	-0.0166667					-0.237	0.086
Adgrl1	0.473501	1	0.199869	-0.221522	-0.488333	-0.268602	0.734587	-0.754919	-0.59175	0.0846693	0.666137	0.28238	0.469405	0.112614	0.113071	0.0136228	-0.0314889	0.278197	0.0451667	-0.0341792	-0.155581	0.372455	0.314091	-0.08	0.116667	1.44316	0.39	0.116645	0.0559545	0.178778	0.118899	0.05	0.2175
Adgrl2	1.09364	0.83871	-1.24446	-1.26837	-0.653706	-0.0817726	0.666091	-1.33082	-0.374827	0.138397	-0.690918	-0.488575		0.188875	0.576745	-0.0589826	-0.00260907	-0.154046	0.288548	-0.338209	-0.738925	0.0520879	0.6538			-0.954728	-0.296667			-0.799656	-0.579472	-0.286	-0.624
Adgrl3	0.439977	0.870968	-0.109779	-0.50781	-0.776404	0.976824	0.669043	-2.1782	-0.00804432	-0.264404	0.101626	-0.046114	0.21092	0.278292	0.777029	0.0397618	0.273899	0.349475	0.249137	-0.178488	-0.350133	-0.0608266	0.185145			0.293845	-0.61			-0.0325923	1.49726	-0.107	0.2395
Adgrl4	0.0794879	1	-0.0217907	0.113282	-0.915504	0.785988	1.67167	1.9956	0.507844	-0.4709	-0.0633788	-0.0350202	0.0138322	0.12336	-0.245857	-0.24448	-0.308612	-0.0256926	0.162639	-0.032669	0.0426788	-0.0839693	-0.0366035	-0.0133333	0.01	0.0827134	0.04	0.093604	-0.0451809	0.0451487	0.209623	-0.029	-0.885
Adgrv1	0.141591	0.967742	0.177721	1.21946	-2.36826	0.867896	0.676192	-0.383856	0.560772	0.10073	0.00145151	-0.0348242		-0.0484659	-0.140719	-0.0540915	-0.228772	0.0422703	-0.011407	0.0680775	0.118172	-0.00475255	-0.00399139	-0.376667	-0.38	-0.0173859	-0.0333333	0.0477787	-0.0866277	-0.0153592	-0.0314066	-0.011	0.00333333
Adh1	0.506568	1	-0.346213	0.539026	-0.0921574	0.221888	0.176077	2.4211	1.035	-0.275	-1.36864	-0.804515	-2.90339	-0.592419	-2.81586	-0.525546	-1.45555	-0.905519	-0.216926	-0.239809	-0.381039	1.66879	-0.204464	-0.2	-0.406667	-0.0545937	-0.22	0.108644	0.026272	-0.113935	-0.0367563	-0.127	-0.248
Adh4	0.078097	1	0.485524	-1.66192	3.02718	2.98674	1.23266	-0.06292	0.395	-0.535	-0.0529669	-0.0231466	-0.294435	-0.0674789	-0.194084	-0.154852	-0.163521	-0.0273577	0.152025	-0.0329478	-0.0134394	-0.114284	-0.0142431	0.273333	0.103333	0.0839743	-0.0833333	0.0249721	0.0533584	-0.107383	-0.00955224	-0.862	-0.159
Adh5	2.63125	1	-0.810282	-0.516676	-0.430205	0.212393	-0.3673	-0.404896	-0.10638	-0.373449	-0.0865076	-0.264344	-0.197136	-0.171472	-0.111147	0.292319	0.116225	0.0495808	-0.124234	-0.125093	-0.513532	0.029009	0.0672565	-0.05	0.0966667	-0.00862244	-0.0433333	-0.346256	-0.0311343	0.0016997	0.0894009	0.101	0.715
Adh6a	0.161857	0.806452		1.35548	1.49125	3.26679	1.20945	0.00443	0.325	-0.015	-0.15885	-0.266187		0.222551	-1.72485	0.650659	-0.620434	0.0200822	0.0444303	0.0804998	0.10442	-0.00788976	-0.0365158			0.064708	0			-0.122577	-0.126235	-0.33	-0.746
Adh6b	0.177941	0.709677		-0.930737	1.56478	-1.25873	1.02975	-0.137515	0.995	-1.145	0.115114	-0.100888		-1.15634	-2.80788	-1.21377	-1.2649	-0.0108702	0.0259422	-0.0745959	-0.123371		-0.0712343			0.0869627	0.08			-0.282917	-0.148567
Adh7	2.44638	1	-2.48923	-1.07115	1.39224	-1.61508	-0.320429	-1.3601	-0.484508	-0.152193	-2.15148	-1.48009	-3.09336	0.0739751	0.968486	-0.0866312	0.0307917	0.349488	0.382636	-2.02849	-1.81776	0.592447	-1.17837	0.09	-0.07	-0.486423	-1.71667	-2.16876	-1.51591	-1.14797	-0.170828	0.242	0.578
Adhfe1	0.160232	1	-0.456362	-0.889879	-1.42901	-1.29744	0.423862	-0.492159	0.323449	-0.265372	0.0171818	-0.00951818	-0.0257902	-0.0706862	-0.232192	-0.0681974	-0.184681	-0.0837829	-0.0649827	-0.486254	-0.558211	1.80963	0.192888	-0.06	-0.156667	-0.328292	-0.66	-0.0671853	-0.0717367	0.0167009	0.116902	0.028	2.412
Adi1	1.54814	0.967742	-1.22116	-0.372392	-0.344221	-0.237088	0.589124	-0.50631	-0.914721	0.31541	-0.266761	0.218166		-0.321874	-0.110434	-0.151877	-0.279951	-0.215932	0.0335129	-0.0542275	-0.241804	0.250239	0.314118	0.0933333	0.23	-0.241729	-0.113333	-0.128518	0.170213	-0.933414	-0.164494	0.1915	0.0175
Adig	0.0886268	0.935484		-0.312939	1.42663	-1.69032	0.159199	-1.09848	0.99	0.015	-0.0590355	0.0771081		-0.0611119	-1.03041	-0.266483	-0.232257	-0.0559838	-0.143647	-0.0107919	-0.0742634	0.0621327	-0.000635332	-0.0833333	-0.1	-0.00166309	0.183333	0.104229	-0.163706	0.183784	-0.0892842	0.1175	0.1115
Adipoq	0.0588797	1	0.408641	0.289507	3.47393	2.72792	-2.36565	2.81423	0.265	0.24	0.0730148	0.0224036	0.0668378	-0.109066	0.078539	0.0620458	0.106136	0.0880865	-0.0507424	0.0333501	0.0759748	-0.0504354	0.0546745	0.0833333	0.266667	0.124944	0	-0.139282	-0.0856918	0.250693	0.0553521	-0.693	-1.083
Adipor1	3.92669	1	-0.072092	-0.246358	-0.184308	-0.376434	0.553414	0.371701	0.942371	1.9599	-0.0141177	0.0769875	-0.128756	0.0304914	-0.20279	-0.091649	-0.0167614	0.0776679	0.137035	0.0113586	-0.132052	0.0559122	0.14987	0.156667	-0.0166667	-0.164424	-0.0733333	-0.100653	0.0457949	0.161357	0.434355	0.029	0.085
Adipor2	2.65081	1	-0.722397	-0.189795	-0.440077	-0.220482	0.729506	0.48863	-0.274641	-0.363271	-0.571799	-0.112876	-0.592313	-0.188035	-0.540893	-0.0605372	-0.156921	-0.329209	0.0581284	-0.0218983	-0.0327078	0.22024	-0.229248	-0.193333	-0.106667	-0.41259	0.253333	-0.164435	0.0451016	-0.559704	-0.261189	0.503	0.447
Adk	1.69073	1	-0.231417	-0.0742902	0.239112	0.220804	0.114249	-0.27919	-0.515832	-0.0913759	0.099027	-0.309839	0.267347	0.174402	0.00656585	0.195657	0.151772	0.328879	-0.404651	0.0316569	0.0224169	-0.0432772	0.153091	-0.163333	-0.11	-0.241675	-0.00666667	-0.145594	0.473397	0.439294	0.113197	-0.013	0.2045
Adm	0.167174	1	-1.13598	-1.27864	0.622248	-1.59062	1.05317	0.64742	0.683392	-0.436202	0.018434	-0.0891078	-0.0631284	0.276113	-0.240254	-0.182445	-0.208231	-0.147114	0.0444213	0.0315631	0.247776	-0.0451143	0.0691229	-0.283333	-0.243333	-0.351028	-0.14	0.00898274	-0.0021047	-0.00262288	-0.0908543	-0.211	-0.345
Adm2	0.164923	0.870968	0.229549	-0.360357	1.21723	-1.68806	-0.944858	-0.147053	1.74	0.095	-0.143364	-0.0129659	-0.0719076	-0.0669652	0.05911	-0.249577	-0.111645	-0.241741	0.0121692	-0.052912	0.115624	-0.113208	-0.392601			0.0662277	0.103333			-0.0269315	-0.132903	0.055	-0.564
Adnp	2.5728	0.548387	-0.0964684								0.194799	0.094145	0.0715616	0.00462877	0.0869923	0.136905	-0.0699091	0.208896	0.13848	0.101403	-0.0464483	0.0833481	-0.148267			0.0579248						-0.204	0.3875
Adnp2	0.793216	0.967742	0.0351467	-0.187055	-0.0936729	0.407206	0.326318	-0.812478	-0.412502	-0.123498	0.291592	0.489677		-0.151507	-0.0121557	0.124692	0.0360749	0.104242	0.192244	-0.0150748	0.0236737	0.0516118	0.0851816	0.0133333	0.16	0.0253111	0.1	0.0824591	-0.0130533	0.10666	0.0827043	-0.039	0.146
Ado	0.993926	0.83871	-0.493975	-0.468841	0.0289578	0.318519	0.285643	-0.0327069	-0.168789	-0.561175	-0.129379	0.561168		-0.0793599	0.217179	-0.0207896	0.257498	0.162832	0.0119336	-0.111333	-0.0792724	-0.203466	0.0547337			-0.360951	-0.09			-0.192362	-0.597066	-0.1045	-0.1405
Adora1	0.391937	1	-0.44323	0.722109	-1.02335	-1.04591	0.126065	-0.820039	-0.149607	0.0894848	-2.45609	-2.07537	-0.631457	-0.0246596	0.0765559	-0.192947	0.0414742	-0.428058	-0.528801	-1.16459	-1.15314	-0.105474	0.950916	-0.0266667	-0.223333	-0.099412	0.0733333	-0.161092	-0.143159	-0.59614	0.144541	-1.301	-0.696
Adora2a	0.243658	1	0.345406	-0.586927	-1.30506	-1.03376	0.611204	-0.0178583	0.85125	-0.0551239	-0.211176	-0.216647	-0.0772022	-0.0702123	-0.263305	-0.106566	-0.398835	0.0446992	0.0382498	-0.290192	-0.0700973	3.67087e-05	-0.234623	0.106667	0.05	0.0347339	0.0833333	0.0332753	0.0594412	-0.0204802	0.0284913	0.308	-0.229
Adora2b	0.34379	1	0.25407	1.73227	1.23681	2.11719	1.13049	1.46703	0.469699	-0.031401	0.120119	0.0551589	-0.624823	-0.524411	-1.32421	-0.320712	-0.66885	0.236448	0.120636	0.052545	0.231114	0.0338318	0.079025	0.07	0.126667	-0.0179803	0.266667	0.137361	0.0736805	1.14977	0.658348	-0.004	0.0195
Adora3	0.0996706	0.870968	0.127926	0.356694	-1.06981	0.112619	0.856975	0.182039	0.275425	-0.394253	0.0169196	-0.235547	-0.11123	-0.0722503	0.335162	-0.244992	-0.00668866	0.154099	0.081455	-0.0410033	0.0874886	-0.024051	-0.0178762			0.00559218	0.0833333			0.16907	-0.0815977	0.0365	-0.084
Adpgk	0.556022	1	-0.169914	0.0249909	-0.327171	-0.6293	0.659543	0.314406	-0.507798	-0.483541	0.410143	0.52215	0.296869	-0.0672817	0.0784459	-0.0333358	0.104608	0.180057	0.342718	-0.0659495	-0.113895	0.147632	-0.685813	-0.316667	-0.103333	0.637852	0.343333	0.00708184	-0.326639	0.0941087	-0.0144323	0.0705	0.2165
Adprh	0.921336	1	0.323139	-0.235698	0.0834701	0.0502473	0.621866	0.974339	-0.123296	-0.777159	0.36845	0.331911	0.219116	-0.137254	0.106427	-0.146741	0.0220197	0.0723727	0.363741	0.235043	0.418519	-0.23506	-0.205085	-0.223333	-0.32	0.728909	0.433333	0.270052	0.550366	0.211523	0.392316	-0.022	-0.134
Adprhl1	0.0929096	0.870968	0.424354	0.39079	-0.68226	0.076962	2.10109	0.166517	0.41	-0.325	0.278877	-0.0208717	-0.0253558	0.0744113	0.0534558	0.101429	-0.425038	0.123675	-0.0590608	0.0731639	0.171177	-0.0450814	0.0225242			0.000279673	0.146667			0.0921051	-0.139884	-0.004	-0.214
Adprhl2	0.717215	1	-0.303147	-0.276658	0.0316685	-0.204043	0.132791	0.28708	-0.76	-2.75	0.0350331	0.02621	0.0265741	-0.055141	-0.218847	-0.177271	0.12013	0.195973	0.0136926	-0.0521317	0.0942456	-0.0122004	0.0721983	0.12	0.11	0.0526225	-0.163333	-0.159896	-0.222827	-0.14448	0.134903	0.137	-0.01
Adprm	0.756573	1	-0.532185	-0.221052	-0.157467	-0.163922	-0.163391	-0.309982	0.78	1.63	0.0880576	0.136227	-0.111756	0.0480486	0.0259395	0.191935	0.273916	0.102864	0.29374	0.0925592	0.0768275	-0.0802603	0.43969	-0.213333	-0.0833333	0.0357174	-0.13	0.0900714	0.491042	0.144111	0.326422	-0.141	0.07
Adra1a	0.163973	1	0.544067	0.284345	-1.60462	-0.981362	0.310788	-0.0236268	0.863392	0.0663995	0.249652	-0.0177349	0.0434878	0.0357313	0.0268327	-0.334236	-0.502919	0.233555	0.0173002	-0.0110932	0.274211	0.0157712	-0.0109698	0.0766667	0.38	-0.0545503	0.123333	-0.157725	-0.0842597	0.0525771	-0.114797	0.105	0.092
Adra1b	0.168568	1	0.939249	-1.29994	0.323438	1.8147	1.46145	-0.164963	0.79	-0.54	0.0974882	-0.00698059	-0.0329456	0.102582	-0.163784	-0.0336377	-0.463592	0.155711	0.127842	0.485493	0.36405	0.24347	0.0305097	-0.0166667	0.02	0.764675	0.0766667	0.128757	0.122087	0.184472	0.0014503	0.34	-0.581
Adra1d	0.317916	0.580645	-0.468273								-0.0844577	-0.421346	-0.066277	0.0410325	-0.152707	-0.228075	-0.513315	0.181136	0.205466	-0.246984	-0.126689	-0.00779408	0.0863762			-0.227264	-1.36					-0.1785	-0.341
Adra2a	0.145494	1	0.512397	0.338839	0.923694	1.80148	2.45892	2.39007	0.444709	0.23791	-0.258622	-0.0328265	-0.166953	0.0299208	0.313095	0.0843129	-0.246003	-0.0458882	0.14509	0.210695	0.0693109	0.00932131	0.0562624	-0.256667	-0.13	0.121862	0.01	0.0480942	-0.125203	0.138594	-0.148134	-0.324	1.187
Adra2b	0.116127	1	0.810114	0.117174	0.820782	0.200316	2.18803	0.144419	0.553303	-0.265391	0.303012	-0.281435	-0.0925762	0.258511	-0.298153	-0.115536	-0.253577	0.370017	-0.256923	0.32482	0.131476	0.0758235	-0.0174447	0.156667	0.0766667	0.059557	0.0233333	0.0262873	-0.192686	0.0938384	0.219374	0.04	-0.601
Adra2c	0.113662	1	0.435761	0.519538	-0.339333	-0.487973	0.737088	-0.35532	0.655387	0.0242169	-0.242813	-0.258879	0.015723	0.296786	-0.228559	-0.0646291	-0.0590203	-0.120825	0.138456	0.111163	0.0747733	-0.0499647	-0.0224644	-0.166667	0.0733333	-0.169973	0.183333	0.0703219	-0.0291353	0.019659	-0.131112	-0.401	-0.49
Adrb1	0.31679	1	1.2903	-3.64386	1.28421	-2.65535	-2.58496	-5.42207	0.115	0.13	0.259695	-0.299278	-0.145011	0.0656161	0.0667646	-0.00794978	-0.366522	0.384806	0.0123804	-0.0287282	-0.0315796	-0.017388	-0.0225701	0.05	0.176667	0.00377643	-0.0166667	0.0460897	0.0066127	0.0311688	-0.00700486	-0.0825	-0.6415
Adrb2	0.384049	1	-0.332596	-0.558843	0.205933	0.948518	-1.12134	2.03983	-0.755	-0.05	0.145433	0.362228	-0.248965	0.593363	-0.455711	-0.0690578	-0.434146	0.256401	0.270331	0.120212	0.0548583	0.604043	0.0576118	-0.02	0.0333333	0.300571	-0.373333	0.160256	0.28572	0.590468	1.31649	0.319	-0.09
Adrb3	0.0842447	1	0.632097	0.114066	-0.0722954	1.38934	0.504849	0.102333	0.733854	-0.0335325	0.0973188	0.0197533	0.141892	0.149688	-0.344205	-0.0307411	-0.366523	-0.0990488	0.0190606	0.0691791	0.0857782	-0.186348	-0.0598034	0.19	-0.0433333	-0.0894165	0.133333	0.126849	-0.0156381	0.915567	0.651492	-0.171	-0.0445
Adrbk1	2.09522	1	-0.379834	-0.220118	-0.0324414	-0.30533	0.594746	0.495879	0.558626	-0.510769	-0.0685731	0.0587744	-0.311789	0.0935523	-0.116684	-0.090358	-0.175021	-0.240083	-0.267461	-0.0126595	0.000790222	-0.27193	-0.129747	-0.0133333	0.16	0.119297	0.126667	-0.0774549	-0.0265586	-0.385182	-0.616197	0.043	-0.201
Adrbk2	0.0947708	0.870968	0.0200777	-0.165457	0.450052	-0.520512	0.642692	1.34123	0.371984	-0.28934	0.0138297	-0.0973504	0.076048	0.299825	0.260473	0.415014	-0.171217	-0.0334284	-9.7421e-05	-0.0933556	-0.0654783	-0.082758	-0.00330032			0.0553913	-0.00666667			-0.0142492	-0.0241973	0.163	0.0305
Adrm1	2.86271	0.83871		-0.289014	0.0649987	-0.313052	0.649692	-0.29302	-0.26892	-0.337806	-0.305719	-0.233502	0.273319	0.047564	-0.133533	-0.126188	0.00204569	-0.037777	0.115142	0.0943512	0.0912998	-0.0706486	-0.293249			0.205235	-0.0466667			-0.122587	-0.644271	-0.035	-0.608
Adsl	2.24083	1	-0.616258	-0.118006	0.474286	-0.0421104	0.624246	-0.563115	0.34	-0.565	-0.0976911	-0.329959	0.165732	-0.199709	-0.0210823	-0.0583186	0.188578	0.116075	-0.134874	-0.183815	-0.116363	-0.36897	-0.189137	-0.136667	-0.06	0.10026	0.03	-0.696169	-0.322367	-0.368836	-0.679295	0.086	-0.21
Adss	4.03438	1	-0.407654	-0.268991	0.0976425	-0.280592	0.278828	-0.00141667	-0.575	1.125	-0.27568	-0.35851	0.181226	-0.0172867	0.276665	-0.0895929	0.0315632	-0.0869409	0.0440452	-0.162412	-0.278791	0.228903	-0.311437	0.0766667	-0.223333	-0.126282	0.103333	-0.618036	-0.187733	-0.573757	-0.402154	-0.132	-0.331
Adssl1	0.688531	1	1.80157	-0.617377	0.995648	0.187485	1.22119	1.55964	-1.65	-0.79	2.21833	2.17784	1.96259	-0.144699	0.197978	0.215855	0.144984	0.161522	0.181752	1.11728	1.1176	0.159012	0.223656	0.136667	0.203333	1.70122	1.40333	2.05127	0.99435	1.24475	1.66983	0.3	1.771
Adtrp	0.306966	1	0.567734	0.685127	-1.04439	-0.241008	0.621488	-0.37152	0.47	0.085	0.151525	0.0594372	0.154159	-0.22752	-1.0099	-0.234847	-0.0970529	0.237354	0.103948	0.0961548	0.158305	0.0273746	-0.0439523	0.41	0.12	0.0714622	0.12	0.139998	-0.0892402	0.199926	0.12399	-0.2785	0.013
Aebp1	0.581217	1	0.645691	-0.260101	-1.03937	-0.734609	0.694076	3.74201	0.432217	0.118617	0.0648134	-0.180571	0.00518145	0.467083	1.20155	0.321222	0.868186	0.00894956	0.0691365	0.0609627	0.160929	0.153068	0.0644174	-0.00666667	0.0966667	1.22595	-1.13333	0.0422658	0.0255219	2.38186	4.05274	0.114	-0.057
Aebp2	1.13022	1	0.15431	-0.673596	-0.432251	0.0666825	0.794916	-0.0281393	-0.436612	0.0207675	0.518396	0.660868	0.209588	0.0950446	0.114828	0.0440133	0.0572078	0.0766776	0.291854	0.341545	0.276924	-0.0857512	-0.233709	0.15	-0.0433333	0.149293	0.03	0.250419	0.00751275	0.288021	0.00992779	-0.221	-0.8405
Aen	0.809612	1	-0.388784	-0.411795	0.799117	0.533017	0.397322	-0.275672	-0.635564	-0.229926	0.0329744	-0.150478	0.0299574	-0.0847586	0.122743	-0.122892	0.145265	-0.0484596	-0.275126	-0.174282	-0.124793	-0.237895	-0.579675	-0.00666667	0.0533333	-0.167556	0.11	-0.597335	0.00719468	-0.0453806	-0.667312	-0.1845	-0.499
Aes	4.44935	1	-0.236929	-0.342303	0.150931	-0.552066	0.791847	-0.0786667	1.63	1.915	-0.279317	0.0240562	-0.2991	-0.124041	-0.146403	-0.0217281	-0.0375445	0.119925	-0.0117186	-0.177163	-0.112682	-0.0619204	0.0821893	0.256667	-0.43	-0.0917609	-0.14	-0.247116	-0.17268	-0.545947	-0.304175	0.229	0.066
AF067061	0.247019	0.387097		0.455195	1.85175	-0.956411	-0.537028	0.320585	2.79	2.45			0.0438147																	-0.815597	-1.03396	-0.1725	0.3325
AF067063	0.071364	0.870968	-0.0703583	0.461227	-0.159308	-0.369234	-0.319757	0.17935	0.505	0.54	-0.100897	-0.208511	0.171479	0.136917	-0.119213	-0.202113	-0.0231905	0.0883611	0.062319	-0.123288	0.138686	0.119414	0.0549982			-0.0227479	0.126667			-0.276624	-0.310027	0.184	-0.135
AF251705	0.199261	1	0.288533	-0.354204	0.11714	0.00488773	0.686567	2.49337	0.74	-0.32	-0.111747	0.108141	-0.0398351	-0.117384	0.0191223	-0.305054	-0.482359	0.374303	0.190107	0.0485338	-0.041701	0.148177	0.0405793	-0.0733333	0.01	0.017559	0.15	0.210201	0.0739049	0.0277059	-0.216492	-0.795	-0.98
AF366264	0.0468424	0.870968	-0.715529	-0.807355	0.4975	0.777608	-0.678072	0.274035	0.4	-0.175	-0.0238327	0.13921	-0.149114	-0.0487365	-0.0108755	0.185439	-0.348414	0.272998	-0.0481695	0.00750265	0.281953	-0.109814	-0.0115242			-0.0783036	-0.21			0.0384052	-0.0586553	0.0475	0.112
AF529169	0.0948877	0.870968	0.572699	0.995908	-0.674848	1.18103	2.88141	-0.0805143	0.452035	-0.319347	0.101502	-0.262487	0.0731326	0.266324	-0.117722	-0.0441609	-0.237453	0.296841	0.0500856	-0.00408384	0.163407	0.00770682	-0.0709888			0.0598441	0.0866667			0.143903	-0.0722272	0.324	1.115
Afap1	0.896858	0.870968	0.62414	0.520619	-0.494336	0.237315	2.79722	0.448308	-0.361085	0.111172	1.26383	0.808752	0.16855	0.264345	0.453249	0.217632	0.433954	0.479133	0.698633	0.535243	0.521485	0.494689	0.292652			0.114205	0.963333			0.169882	0.291885	-0.212	-0.538
Afap1l1	0.207891	0.83871	0.221553	0.785875	-0.662335	-0.211697	-0.429	-3.39872	0.52	0.365	0.181179	-0.19614		-0.0756964	0.124392	-0.485676	-0.107278	0.163322	-0.0863824	-0.0627679	0.101349	-0.0718732	0.00211469			0.0617348	0.0933333			0.347511	2.26109	0.244	0.13
Afap1l2	0.622676	0.83871	-1.10315	-1.12641	-0.279448	-1.42667	-1.15989	-2.43624	0.0810611	0.0885786	0.0310162	0.991647		0.0986594	0.323094	-0.109306	0.272499	0.493241	0.412242	-0.065705	0.0950592	0.0320792	-0.0257445			-2.31699	-2.53			0.719941	2.52236	0.112	0.261
Aff1	1.13841	1	0.61872	0.168421	-0.432224	0.101296	0.224672	0.0143553	-0.538086	-0.388439	1.24434	0.764601	0.406616	0.204042	0.133296	0.0432194	-0.165789	0.156032	0.532219	0.730967	0.567898	0.469603	-0.5639	-0.05	-0.0166667	1.37588	0.61	0.517606	0.233005	0.259964	-0.170352	-0.2665	-0.331
Aff2	0.237834	1	-0.888502	1.78166	-0.313471	0.827003	1.31943	2.24163	0.279525	0.280485	0.179095	0.743203	-0.042437	1.60136	1.61457	1.63987	1.73044	0.624324	0.500367	-0.784706	-0.945047	0.0482058	0.762466	-0.11	0.0666667	0.305327	-0.0933333	-0.00720634	0.0505847	0.212438	0.452607	0.088	0.291
Aff3	0.217568	0.83871	0.411381	-0.511355	1.37428	-0.199615	-0.00663358	-0.294186	0.893463	0.100823	-0.0889863	-0.0411021		-0.327949	-0.00119282	-0.163569	-0.31993	0.0396779	0.0551362	0.0633483	0.103157	0.0307731	0.00726908			0.0109955	-0.06			-0.000996476	-0.033779	-0.251667	-0.116667
Aff4	3.76805	1	0.173506	-0.883572	1.20816	-0.15284	0.519416	-0.421182	-0.336557	0.117059	0.0729556	0.27732	1.02227	0.114944	0.112829	-0.0358411	-0.0906958	0.289582	0.689333	0.325285	0.241552	0.411608	-0.184622	0.16	0.276667	0.105772	0.0833333	0.484143	0.480012	-0.0171768	0.180907	-0.169	-0.539
Afg3l1	0.969884	1	-0.552706	-0.288466	0.256309	-0.208033	0.831076	-0.551489	-0.686757	-0.160132	-0.449449	-0.0895284	0.0934723	0.212027	0.328333	0.0659337	0.279498	-0.2167	-0.00402433	0.0163305	-0.00139333	-0.271138	0.0776868	0.173333	0.263333	0.093511	-0.05	-0.107495	-0.00415894	-0.00352979	-0.0533275	0.173	0.179333
Afg3l2	1.34657	1	-0.611872	-0.20339	-0.0339205	-0.182603	0.596612	-0.863349	-0.985938	-0.280606	-0.304116	-0.190449	0.0257122	-0.0754041	0.0216842	-0.26007	0.00896132	0.0541318	0.121619	-0.168404	-0.143038	-0.257089	-0.16696	-0.09	-0.0866667	0.0598184	-0.0166667	-0.293317	0.112246	-0.10724	-0.0430961	0.056	-0.267
Afm	0.181862	1	-0.548887	-0.545926	-0.552187	-1.13685	0.282908	0.00679652	0.882866	0.126386	-0.158323	-0.210193	-0.0454779	0.0848906	-0.0852592	-0.332122	-0.0506398	-0.0285375	-0.177014	-0.981872	-1.23637	0.051112	1.70174	-0.0566667	-0.22	0.0335098	0.0233333	-0.106883	-0.225276	-0.434303	0.47866	0.01	0.282
Afmid	0.366935	0.870968	-0.706743	-0.0481235	-0.308317	-0.142407	0.28248	-0.137323	0.509071	-0.269146	-0.504915	-0.207525	-0.227811	0.19679	0.269165	-0.140706	0.120841	-0.0573206	-0.0881492	-0.537594	-0.537939	-0.147724	0.280739			-0.216293	-0.173333			-0.154342	0.0704649	0.278	0.447
Afp	0.503267	1	-0.0852871	0.0344091	0.333179	0.456092	-0.129143	3.53543	0.751684	0.587576	-0.192343	-0.333552	0.11157	0.0461727	-0.00645125	-0.195447	-0.079364	0.166644	0.0706084	-0.519943	-0.369422	-0.00825745	2.16729	0.0766667	0	-0.0267346	0.0766667	-1.35218	-0.652583	-0.733843	-0.650543	-0.236	0.841
Aftph	1.73954	1	-0.47113	-0.191014	1.19178	-0.437334	0.127028	-0.764177	-0.630991	0.189354	-0.0663181	0.144668	0.0654901	-0.000675862	0.0251454	-0.0176064	-0.0149276	-0.0111946	0.143029	-0.193564	-0.372214	0.211985	-0.185471	-0.0166667	-0.106667	-0.316295	-0.41	-0.249904	-0.365988	-0.1448	0.0240905	-0.049	-0.764
Aga	1.46649	0.870968	-0.686554	-0.276677	-0.104646	0.298643	0.199779	-0.519575	-1.15	0.815	0.158644	0.262952	-0.0199486	-0.0966599	-0.194971	-0.168159	0.0700381	-0.0966633	0.32969	-0.390788	-0.298049	0.00969041	0.416039			0.0924679	0.156667			0.69184	1.46351	-0.092	0.49
Agap1	1.38317	1	0.288602	-0.198114	-0.358834	0.349041	0.665553	-0.685377	-0.291614	0.0603501	0.341613	0.312183	0.0565482	-0.0279168	-0.190842	-0.156317	-0.123177	-0.126158	0.0316828	0.179792	0.132263	0.123986	-0.207681	-0.346667	-0.0833333	0.479363	0.49	0.712611	0.296955	-0.257778	0.0553063	-0.213	-0.164
Agap2	0.172624	0.83871		-1.86853	0.254183	-1.45856	1.15754	-0.122967	0.35	0.045	-0.0502461	-0.162381	-0.0457002	-0.110205	0.148273	-0.0438593	-0.231713	-0.284743	-0.394447	-0.636882	-0.751015	0.0568566	0.529628			-0.00479699	0.0233333			0.115989	-0.0397136	-1.257	-0.111
Agap3	0.852836	1	-0.170174	-0.135443	-0.057057	-0.0314151	0.453964	0.484032	-0.935	-1.715	0.22331	0.266459	0.013963	-0.00606006	-0.102863	-0.0467867	-0.166584	-0.130742	-0.0820009	0.117286	0.129955	-0.0377742	0.0818117	-0.1	-0.0133333	0.0490137	0.116667	0.0870838	0.0494533	-0.382399	0.0606816	0.2445	0.2585
Agbl1	0.0714899	0.580645	0.223719								0.0875887	-0.12214	-0.0219639	0.335808	-0.123886	0.144775	-0.287106	0.121968	-0.08367	0.00559809	0.101154	-0.0652324	-0.0213847			0.111639	-0.0166667					0.833	0.446
Agbl2	0.0520932	0.580645	0.226688								0.0484809	-0.068016	-0.0693011	0.0176119	0.124352	-0.0582658	-0.219525	0.101983	-0.0685505	-0.0011237	0.167395	-0.0236804	0.00519261			0.00106242	0.17					0.257667	0.621667
Agbl3	0.360804	1	-0.977914	0.0377103	-0.151399	-0.743337	0.0676559	-0.226349	0.381731	-0.0655865	-0.13722	0.359783	0.13626	-0.0851582	-0.093248	-0.0510803	0.10518	-0.0547898	0.00718179	0.0840489	-0.0731982	0.338563	0.187966	-0.0533333	0.373333	0.36466	0.0433333	-0.0331511	-0.186055	-0.175506	-0.177473	-0.547667	0.519333
Agbl4	0.0457954	0.83871		1.1969	-0.947647	0.246423	1.19568	-0.103908	0.28772	-0.144274	-0.00910975	-0.0694033	0.116414	-0.117476	-0.025035	0.0495903	-0.110675	-0.0164472	-0.062131	0.127019	0.129773	0.0616899	-0.0656655			0.112931	0.03			0.0358276	0.0442552	0.00025	-0.063
Agbl5	0.430183	1	-1.05618	0.1307	-0.685924	-0.395641	0.441358	-0.805356	0.176386	-0.185095	-0.0301765	0.0550026	0.111396	-0.0746369	-0.16026	-0.17766	0.0865862	0.109804	0.113382	0.034275	-0.227519	0.275633	0.36422	-0.296667	-0.01	-0.559131	-0.0533333	-0.0235522	-0.264189	-0.261141	-0.0193047	0.084	0.252
Ager	0.214146	1	0.267333	-0.437113	-0.633751	0.290476	-0.362273	-0.165437	0.887569	0.606787	0.301382	-0.335889	0.0265033	0.0735287	-0.022337	-0.1925	-0.31738	0.0556519	-0.13387	0.0362192	0.149144	0.1202	0.0416411	0.0733333	-0.03	0.0672876	0.0333333	-0.0546809	-0.0273741	-0.0559911	-0.0799377	-0.301	-0.43
Agfg1	4.28554	1	-0.172924	-0.193655	0.251712	-0.397915	0.495361	-0.959818	-1.57333	0.0889665	-0.472599	-0.423688	0.352319	0.0455393	0.0304642	0.0174267	0.0388776	0.525171	0.222888	-0.149342	-0.0546862	-0.262073	-0.0480992	-0.0366667	-0.0166667	-0.0545955	-0.03	-0.267084	0.0146047	-0.563859	-0.267639	0.03	0.13
Agfg2	0.899092	1	-0.455322	0.0379419	-0.256126	-0.492635	0.0132224	-0.706812	0.648882	1.04732	-0.400349	-0.294695	0.010503	-0.0270395	-0.395461	0.0869787	-0.0731979	0.0481826	-0.260293	-0.195224	-0.302409	-0.167108	0.661617	-0.126667	-0.0433333	-0.134801	0.0266667	-0.19617	-0.290307	-0.086931	0.256017	0.0315	0.5195
Aggf1	1.26289	1	-0.551658	-0.180767	0.0160629	-0.161749	0.273107	-0.468175	-2.695	-0.575	-0.0483768	0.321163	-0.00141169	-0.137508	0.00282896	0.146053	0.119577	0.190719	0.318696	-0.0220174	-0.18857	0.194282	0.133528	-0.633333	-0.65	-0.409281	-0.14	-0.132644	-0.194136	-0.303092	-0.0816884	0.047	-0.062
Agk	0.504644	0.870968	0.33903	-0.143376	-0.152332	-0.870573	-0.0128829	0.129976	0.501946	-0.408981	-0.3078	-0.166107	-0.0024122	-0.0668848	0.120303	-0.246934	-0.138578	0.284608	0.248097	-0.0522826	-0.0406606	-0.298871	-0.125955			0.464512	0.216667			0.158227	0.0340634	-0.155	-0.181
Agl	0.858373	0.935484		-0.273446	0.077788	-0.390513	0.335703	-0.938043	-0.478807	0.660503	0.0803719	0.269342		-0.0168882	0.528263	-0.0500684	0.528463	0.0350497	0.246847	-0.0731038	-0.101226	-0.00886454	0.409565	0.136667	0.24	0.776314	0.0266667	0.170155	0.569529	-0.0637916	0.99504	0.062	0.681
Agmat	0.190981	0.935484		-0.366881	-0.270389	-0.104869	0.615124	0.01375	0.775	-0.275	0.0831823	-0.215171		0.0941379	-0.141104	-0.0988096	-0.43204	0.173226	0.0602819	0.158641	0.112555	-0.0655525	0.0808578	-0.173333	-0.0866667	0.049902	0.113333	0.164397	-0.0337172	-0.0499322	-0.378844	-0.144	-0.778
Agmo	0.260587	0.870968	-1.63483	2.32193	-0.347923	-3.71621	-4.10852	0.254315	0.545	1.985	-1.2315	-0.773502	-0.0263359	0.727422	0.518603	1.09626	0.385135	-0.123557	0.145993	-1.20904	-1.15791	-0.0629648	0.118514			-0.0760556	-0.403333			-1.30971	0.886735	0.409	0.735
Ago1	1.29933	0.870968	0.0428334	-0.266355	-0.100567	0.211159	0.523525	-0.42051	-1.65	0.145	0.491207	0.267753	-0.0260444	-0.070771	0.0924803	-0.0409797	-0.22411	0.0414546	0.0274167	0.275413	0.17009	0.0959965	0.617649			-0.316332	0.153333			0.195158	0.305481	0.0675	0.127
Ago2	1.4319	1	-0.184587	-0.384201	-0.207396	-0.068062	0.504637	0.420483	-0.74998	0.371665	0.0550773	0.080557	-0.024947	0.351285	0.210754	0.0665213	0.0573565	0.0392616	0.052302	-0.0683378	0.0264169	-0.227005	-0.148598	-0.00333333	-0.0166667	0.357079	-0.02	-0.0743333	0.118904	0.0552231	0.344585	-0.111458	-0.101244
Ago3	0.313473	0.870968	-0.754032	-0.270489	1.01738	0.0727424	0.0523682	0.19697	0.0309536	-0.309699	-0.102305	0.0921888	-0.0231486	0.264092	0.203677	-0.104645	0.241661	-0.581479	-0.360853	-0.210801	-0.121932	-0.0546778	-0.109859			-0.130227	0.393333			0.28182	0.339685	-1.033	-1.714
Ago4	0.232853	0.870968	0.370543	-0.529329	0.0336255	-0.194179	0.382847	-0.988458	0.230702	-0.546374	0.0661058	-0.0843264	0.03783	0.152706	0.0494089	0.125461	-0.122847	-0.0617387	-0.134627	0.0555905	0.0584651	0.0351377	-0.0942403			-0.0489504	0.393333			-0.0762425	0.0358189	-0.1455	0.3455
Agpat1	1.73183	0.967742	-0.0923559	-0.123632	0.358324	-0.171683	0.516241	0.573512	1.04958	1.08546	-0.00204769	0.121371	0.221907	0.0401554	0.0360734	0.368212	0.0473029	-0.205303	0.149752	0.0414943	-0.193486	-0.0820472	-0.01153	-0.1	-0.0166667	0.0706108		-0.0563857	-0.312561	-0.0623428	-0.105079	0.104	-0.26
Agpat2	1.9004	0.870968	-1.10985	-0.507994	-0.190791	-0.756312	0.702782	0.214857	1.75	0.58	-0.693756	-0.227089	-0.719732	0.0677847	-0.264788	0.35478	0.223212	-0.217124	-0.354892	-0.238825	-0.205781	-0.017642	-0.0091358			-0.774438	-0.56			-0.671247	0.432074	0.2215	-0.1525
Agpat3	1.80123	1	0.630669	-0.358924	-0.906426	-0.727523	0.0533	-0.21649	0.547967	0.798087	0.417541	0.796527	0.12716	-0.520514	-0.416078	-0.805467	0.0742479	0.78618	0.591365	0.511677	0.565431	0.265487	0.404887	0.09	0.26	-0.240796	-0.256667	0.464779	0.889561	-0.54021	0.0252664	-0.033	-0.53
Agpat4	0.954791	0.870968	-0.388559	-0.700783	0.457954	-0.495574	0.158548	2.80212	0.695408	-0.482085	0.614905	0.311757	-0.320274	-0.00983921	-1.15573	-0.172706	0.110408	0.235698	-0.0909042	-0.212077	-0.064906	0.191564	-0.0361293			0.0424086	0.19			0.39385	0.579306	0.056	0.78
Agpat5	1.31862	1	-1.15919	-0.201501	-0.086115	-0.488674	0.0815537	-0.518461	-0.570599	-0.0744903	-0.99055	-0.934007	-0.142364	-0.0734258	-0.49152	0.0814368	-0.331511	-0.255645	-0.512724	-0.713004	-0.611887	-0.397092	-0.0959128	-0.146667	-0.00333333	-0.140981	0.236667	-0.867012	-0.121794	-0.543175	-0.398658	0.064	-0.17
Agpat6	1.1168	1	-0.90736	0.135107	-0.579016	-0.38779	0.655265	0.00154072	0.100554	0.286729	-0.406963	-0.663523	0.150408	0.144336	0.0959286	0.123565	0.123627	0.0121503	-0.230567	-0.309991	-0.199451	-0.201541	0.294535	-0.17	-0.0366667	0.209515	0.00666667	-0.450405	0.112825	-0.141564	0.152669	0.027	-0.037
Agpat9	0.34453	0.83871	0.266248	-0.538155	0.350099	-0.354251	0.924156	0.0977817	-1.46	0.185	0.431182	0.625794		0.345672	-0.459631	0.0268898	-0.301961	0.437598	0.468367	0.488389	0.476636	0.0404596	-0.779753			-0.0445266	-0.38			0.444265	-0.707914	0.313	-0.086
Agps	1.17125	0.870968	-0.427856	-0.156944	-0.726904	0.792784	-0.0800156	-0.24483	-0.413859	0.151402	-0.238284	-0.461476	-0.132035	0.141732	0.0530055	0.271664	0.239228	0.152576	0.218574	-0.146258	-0.195229	-0.480333	-0.28615			-0.693692	-0.00666667			0.154988	0.106401	-0.1435	0.0095
Agr2	0.0822651	1	0.26293	1.67789	5.38416	1.09803	-0.242883	-0.0276138	-0.0299745	-0.0466352	-0.0549641	-0.140698	0.0394319	-0.0568356	0.183189	-0.0273808	-0.11189	0.0159989	-0.0653347	0.107073	0.0844758	0.0802245	-0.00632527	0.216667	0.12	0.00473601	0.113333	-0.0698587	-0.0742047	0.0542275	0.0145121	0.312	0.062
Agr3	0.112311	1	0.138921	-1.62803	-0.847997	0.415037	1.90689	-0.610743	0.22	0.01	-0.131872	0.118072	-0.155785	-0.259225	-0.424844	-0.269122	-0.515398	-0.142745	0.0880583	-0.0646758	0.00722096	0.0957044	-0.00139066	0.356667	-0.123333	0.040062	0.02	0.0866133	-0.0501887	0.0368314	-0.0981684	1.382	-0.098
Agrn	2.67631	1	-0.293305	0.231567	0.218483	-0.339003	0.497976	-0.841588	0.328853	-0.12742	0.269679	0.00159083	0.27593	0.0193105	-0.031257	0.309085	-0.392114	0.0461368	-0.137196	-0.15187	-0.309157	0.574519	0.315485	-0.216667	0.01	-0.53223	-0.2	-0.245274	0.297159	-0.30908	0.110591	-0.1085	-0.1445
Agrp	0.111858	1	0.051464	-1.18269	-0.667804	-2.18536	1.76939	-0.209162	0.595	0.68	0.0238151	0.0607885	-0.0534097	0.0567456	-0.0727785	-0.0654581	-0.207903	0.236991	0.150176	0.0471922	0.023443	-0.0504796	0.0611645	0.0966667	-0.0566667	0.106827	-0.0166667	-0.0536398	0.223704	0.173768	-0.13339	0.535	-0.169
Agt	0.339548	1	-0.887699	0.263034	-3.48471	-1.22239	0.370368	0.283835	0.725	-0.445	-0.669413	-0.504595	0.168214	-0.107966	-0.217123	-0.330876	-0.363018	-0.670537	-0.136631	-1.51082	-1.89168	0.903362	1.76424	0.0533333	-0.16	0.0355612	0.0233333	-0.0469606	-0.0610432	-0.0560248	1.24624	-0.396	-0.758
Agtpbp1	0.532868	1	-0.606224	-0.124266	-0.0663744	0.0574779	0.190888	0.212805	0.137603	0.52034	-0.0508144	0.290798	-0.143376	0.091392	0.314113	0.194614	0.124757	-0.273892	-0.366318	0.0606887	0.0904072	0.0223575	-1.0203	0.163333	0.123333	-0.512693	-0.226667	-0.0313303	-0.0300532	0.429227	0.454217	-0.0316667	0.189333
Agtr1a	0.225209	0.870968	0.45041	-0.289507	1.29177	1.59455	0.248237	1.01562	0.795	-0.665	0.233887	0.0101872	0.0197539	0.00069249	-0.0425751	-0.0679245	-0.326654	0.189092	0.0289143	-0.0211271	-0.00554924	0.822862	0.0285056			0.0365828	0.0633333			0.0492399	-0.0665653	0.125	0.131
Agtr1b	0.107001	0.870968	0.393097	0.249978	-1.71187	0.142019	3.40498	-0.109135	0.495	0.355	0.109995	0.017715	-0.0523525	0.168089	0.0326735	-0.216358	-0.429532	0.304652	-0.163846	0.0708698	0.116633	0.107695	0.0125172			0.059412	0.0566667			0.220911	0.0285523	-0.944	-0.091
Agtr2	0.0729085	0.967742		-0.874469	1.18641	0.63743	-0.415037	1.09494	0.17	0.05	0.153871	-0.0455141	-0.117015	-0.0982175	-0.128278	-0.00828741	-0.116076	-0.0770492	-0.115027	0.0829888	0.277284	0.0914203	0.010415	-0.313333	0.39	0.00821013	0.11	0.0976976	0.140725	-0.125092	-0.0827397	0.146	0.209
Agtrap	0.848002	1	-0.453473	0.0281059	-0.726454	-0.532294	0.517575	0.827483	0.245588	-1.05167	-0.306956	0.140305	-0.157368	-0.242366	-0.303209	-0.269235	-0.0535601	-0.248126	0.0977504	0.220688	0.0570397	-0.119535	0.286106	-0.05	-0.0233333	0.222122	-0.443333	0.0900952	0.121002	-0.1542	0.30057	0.041	-0.158
Agxt	0.179799	1	0.519179	-3.01854	-0.197446	-0.394779	0.697782	-0.108345	0.845	-0.665	-0.0567388	-0.0858583	-0.0102203	-0.043016	0.0688398	-0.289655	-0.191734	0.0736074	0.0991438	0.00597203	0.166391	-0.0196856	-0.0024381	0.163333	-0.296667	0.324168	0.17	-0.0338055	-0.137154	0.0630248	0.0254986	0.317	-0.01
Agxt2	0.0575696	0.870968	0.234074	-1.90046	-0.668794	2.61738	-2.44294	-0.160512	0.505	-0.41	0.144747	0.0131549	0.0943144	0.244849	0.200373	-0.126683	-0.661457	0.138094	-0.056759	-0.0417852	0.189887	0.0197188	0.0298851			0.00652601	0.0366667			-0.0733527	-0.102118	0.12675	-0.38325
Ahctf1	1.06096	1	-0.404354	-0.457706	-0.157039	0.0940226	0.0873204	-0.664306	-0.605417	0.908029	-0.12235	-0.211229	0.180158	0.181409	0.342313	-0.0844051	-0.0589885	-0.107539	-0.105539	-0.0493814	-0.206157	-0.174074	-0.185895	-0.04	0.356667	0.0437837	0.146667	-0.444039	-0.423861	-0.253983	-0.821388	-0.15	-0.112
Ahcy	4.92433	0.870968	-1.64425	-0.319306	0.264995	-0.014543	0.657156	-0.206	0.7	-0.54	-0.288458	-0.290172	0.10482	0.104467	0.652815	-0.0499559	0.527487	-0.288171	-0.213199	-0.152839	-0.166722	-0.378679	-0.101993			0.1427	0.02			-0.480611	-1.13831	0.150667	-0.167667
Ahcyl1	3.48053	1	-0.181942	-0.388666	0.0205173	-0.510348	-0.27551	-1.04288	-2.35896	0.122212	-0.00642688	-0.00811794	0.362579	0.0420872	0.216779	-0.0921209	0.100642	0.277396	0.218218	0.112147	-0.0329894	-0.0483468	-0.174	0.106667	-0.0233333	-0.437856	-0.2	-0.0886737	-0.286759	-0.121882	0.0561678	0.0195	0.3195
Ahcyl2	1.74356	1	-0.872526	-0.0236422	-0.679687	-0.978692	-0.115812	-0.531331	-0.303995	-0.11473	-0.477628	-0.108728	-0.561434	-0.0399803	-0.137591	0.126037	-0.213744	0.0154704	0.231723	-0.368858	-0.57267	0.246667	-0.0481217	-0.0133333	-0.133333	0.0931916	-0.136667	-0.00823622	-0.0433874	-0.273343	0.339162	-0.0653333	-0.297
Ahdc1	0.625179	1	-0.66025	-0.33939	-0.262986	0.0255016	0.0260183	-0.385603	0.475132	-0.30443	-0.0854058	-0.0950452	-0.250804	0.134945	0.189659	-0.0269812	-0.00725092	0.0525721	0.087187	-0.167454	-0.167053	0.284222	0.406019	-0.176667	-0.14	-0.362968	-0.296667	-0.151	-0.0404084	0.0845782	0.124382	0.0555	0.3235
Ahi1	0.234837	1	-0.687014	-0.241925	0.512086	-0.619925	-0.294619	0.444177	0.0920452	0.317823	-0.0128274	0.232264	0.0863754	0.158342	0.337991	-0.0140444	0.119425	0.150614	0.316474	-0.093962	-0.168074	0.256606	-0.301923	0.0433333	0.23	-0.374111	0.35	-0.0100455	0.186426	0.115149	0.175298	-0.279	-0.036
Ahnak	2.58162	1	-0.559828	-0.890592	0.659596	-0.35508	0.0534007	0.573188	0.709261	0.262823	0.549522	0.282155	-0.156127	0.206506	0.0866713	-0.144062	-0.0780574	-0.657112	-0.571349	-0.0493096	-0.00848029	-0.177522	-0.063109	-0.0166667	0.0133333	-0.565203	-0.466667	0.0218139	0.186632	0.0281608	0.121203	-0.37775	-0.68875
Ahnak2	2.72642	0.806452		-0.104786	0.63965	-0.0592431	-0.103017	2.24193	-0.61	-1.815	0.345674	0.285019		0.15532	-0.193988	-0.11234	-0.289495	-0.600697	-0.356728	0.449163	0.236317	0.0734145	0.492673			-0.84721	-0.116667			0.846387	2.74932	0.134	0.1
Ahr	1.44283	1	0.216574	-0.554807	-0.094977	0.111361	-0.161108	-0.0729978	0.126712	-0.0882529	0.668396	0.662234	-0.0223434	0.00544458	0.667656	-0.31332	-0.0965554	0.674398	0.774254	-0.348249	-0.281436	-0.0866037	0.0464414	0.146667	0.193333	-0.8361	-2.26333	0.163138	0.0735805	-0.33037	-0.0781288	0.3015	0.52
Ahrr	0.065493	1	0.274865	-1.848	1.06413	0.893085	1.73697	0.302738	0.3	-0.185	0.0528124	-0.0840691	0.122459	-0.354176	0.343531	-0.355898	-0.132694	-0.0550221	0.0401967	-0.0306312	0.00556362	-0.0127623	-0.0214499	-0.163333	-0.146667	-0.266753	0.313333	-0.00464476	0.0717165	-0.0801523	-0.261335	-0.013	0.0205
Ahsa1	2.20643	1	-0.142967	-0.349324	-0.177855	0.0527997	0.418947	-0.218785	-0.499425	0.243763	-0.198668	-0.178023	0.292746	0.13763	0.298342	0.13687	0.36456	-0.261135	-0.367718	-0.351401	0.162448	-0.557795	0.191867	0.0366667	-0.13	0.243595	0.04	-0.251623	-0.484364	0.00886517	-0.702872	0.083	-0.025
Ahsa2	1.46252	0.935484	-0.194038	0.026744	0.168332	-0.257522	0.718039	0.0800117	-1.555	0.475	0.211081	0.149266	0.261019	0.200396	0.102813	0.202113	0.0252877	-0.017102	0.0341391	-0.0834017	-0.131404	-0.0514382	-0.132925			0.209161	0.353333	0.138856	0.491863	0.0642838	-0.539186	-0.046	1.349
Ahsg	0.114743	1	0.419595	0.780219	-0.0780025	0.415037	-0.206451	-0.259828	0.79	-0.185	0.0383502	-0.283904	0.0207858	0.091178	0.104771	-0.253803	-0.179287	0.102684	-0.0931809	0.115007	0.0448777	-0.0478741	0.0507723	0.0833333	-0.196667	0.131512	0.0966667	0.0896763	0.0562592	-0.0818737	-0.260487	-0.044	0.07
Ahsp	0.0915685	0.419355		-0.70244	-0.183566	-1.19776	2.50057	0.946728	0.295	0.195			-0.0361027														0.0966667			-0.118967	-0.575829	0.172	0.8
AI118078	0.186927	1	0.387172	-0.764128	0.162057	-0.535574	0.357813	-0.07839	0.62	-0.465	0.0203328	-0.128911	-0.0139938	0.167034	0.211582	0.0224287	0.0767979	0.025594	0.0418052	-0.113778	0.0367135	-0.0709473	-0.106179	-0.05	0.03	0.16698	-0.183333	-0.0583206	-0.111561	0.174273	-0.061193	0.005	-0.548
AI182371	0.0550991	0.580645	-0.443656								0.163696	-0.0313589	-0.0296294	-0.134964	0.154885	-0.0115149	-0.132591	0.0600388	-0.160678	-0.103287	-0.0416018	-0.224	0.103299			-0.0337342	-0.0833333					-0.213	0.075
AI314180	1.30764	1	-0.263634	-0.253434	-0.0793465	-0.665106	0.41731	-0.207313	-0.718293	0.00146891	-0.0695606	0.153216	-0.158351	7.37065e-05	0.142887	0.020201	0.195868	0.0801726	0.141627	-0.037232	-0.145748	0.0699234	-0.184351	-1.1212e-15	-0.07	-0.107794	-0.09	-0.0811637	0.135066	0.0944678	0.341801	0.045	-0.123
AI317395	0.159765	1	0.364132	-0.44131	-0.260496	-0.121166	3.23095	-0.17323	0.210977	0.175857	0.179668	-0.0393274	0.0844443	0.176424	0.158551	-0.0832639	-0.308652	-0.0263182	-0.0111215	0.059181	0.13981	0.00282331	0.000945486	0.0766667	0.0766667	-0.0144263	-0.0733333	-0.196809	-0.158366	0.0058618	0.0136123	1.087	0.481
AI413582	0.765496	1	-0.0717578	-0.10513	-0.246669	-0.261701	-0.0575008	0.181862	2.225	0.78	0.0884854	-0.194416	-0.345747	-0.221963	-0.189054	-0.167565	0.149973	-0.0324723	-0.182924	-0.0621046	-0.0751829	0.0084562	0.0649182	-0.04	0.306667	-0.35477	-0.183333	-0.309212	-0.121823	0.0551915	0.912772	-0.017	-0.033
AI429214	0.269844	0.83871		-0.370187	-0.382393	-0.288113	0.6244	-1.88041	-0.63	0.235	0.20021	0.518444	0.128709	0.153225	0.0591022	-0.0682679	0.373744	0.257265	0.4324	0.451672	0.444346	-0.0484449	0.827381			-0.616811	-0.493333			0.0497146	0.436	-0.598	0.062
AI464131	0.198328	0.935484		0.678072	-0.23644	-1.5429	0.96058	1.30657	0.85	-0.4	0.183427	0.472945		-0.454878	0.261662	0.116492	0.0157083	0.131985	0.634346	0.568913	0.181279	0.287983	0.655014	0.0266667	0.0166667	-0.00177846	-0.0333333	0.084714	0.504388	0.047575	0.441105	0.343	1.03
AI467606	0.396508	0.870968	-0.233852	-0.187073	1.13414	0.0467034	-0.338035	3.56705	0.750969	-1.57519	0.0524663	-0.154576	-0.622365	0.216046	0.0226922	0.0879269	-0.277627	-0.110336	-0.250837	-0.121192	-0.100402	-0.148501	-0.152377			-0.0191535	0.07			-1.15249	-0.55503	0.028	0.8
AI481877	0.0385395	0.483871									-0.0668772	-0.0633759		0.176458	-0.176252	0.662628	-0.220797	-0.0151093	0.0233942	0.0692366	-0.000874773		0			-0.061227	-0.0633333					0.0915	-0.297
AI593442	0.0541381	0.870968	0.363043	1.15299	0.303907	-0.447218	-0.386183	0.224291	0.557202	-0.195	-0.0743278	-0.0757009	0.0442317	0.0156571	0.216347	-0.0244566	-0.121708	-0.047519	0.0183219	-0.0214228	0.0167645	0.0398331	-0.0718699			0.0544447	-0.0333333			0.126104	-0.171549	0.1815	-0.005
AI597479	0.71321	1	-0.643939	-0.504431	0.0682869	-0.227155	0.639768	-1.08993	-2.2	-0.295	0.0395694	-0.0749157	0.124198	0.193921	-0.189439	0.1443	5.38502e-05	-0.0343533	-0.0633207	-0.0727809	0.0466603	0.0184598	-0.0284268	0.06	0.253333	-0.110747	0.176667	-0.203128	-0.13429	0.0331314	0.230091	-0.022	0.327
AI606181	0.458864	0.548387	-0.288315								-0.288046	-0.13866	-0.413048	0.103088	0.228297	-0.155812	0.0567464	-0.410924	0.0436281	-0.351347	-0.283995		0.0295316			0.211291	0.23					-0.6635	0.0875
AI607873	0.0716337	0.806452		2.05889	3.55897	0.652077	0	2.71676	0.07	-0.19	0.163232	0.313965		-0.286703	0.305806	0.226521	-0.126724	0.0711711	0.27697	-0.170308	-0.117673	0.26125	-0.802907			0.543007	-0.77			-0.0912163	0.266284	0.2075	0.066
AI661453	0.443888	0.548387	-0.533327	-0.359313	-0.50696	0.336737	-1.19855	-1.75572	0.195	-0.595														-0.176667	-0.0133333		0.51	0.195419	0.375615	-0.809525	-0.527701	0.2165	-0.5295
AI837181	1.81642	1	-0.186693	-0.0273355	-0.0887982	-0.324648	0.209157	0.387108	-0.725	-2.01	0.174299	0.497667	0.153305	-0.116435	-0.33527	-0.157696	-0.0419132	-0.197534	0.103073	0.0854641	0.00307202	0.19655	0.283124	-0.19	-0.21	-0.27373	0.00666667	0.135022	0.270256	0.614883	0.561815	0.199	-0.148
AI846148	0.422593	0.83871		-0.247829	-0.146658	-0.655506	0.575044	0.042459	0.178646	-0.982522	0.368664	0.235566	0.333606	-0.129799	-0.038869	-0.0996399	0.100553	0.0900223	0.289207	0.405024	0.447217	0.158271	0.077426			0.482053	0.46			0.0957148	-0.0580792	-0.1285	-0.19
AI987944	0.316423	0.870968	-0.679958	-0.856653	-0.410689	-0.0363785	0.503414	-1.30244	-2.265	1.24	0.170042	0.214002	0.00220889	-0.016929	0.244515	0.409611	0.100103	-1.06832	-0.861496	-0.0783615	-0.0902307	-0.09695	0.39207			-0.307559	0.266667			-0.423558	-0.501519	-0.109	-0.008
Aicda	0.105927	1	0.740892	-0.236476	0.0876755	-0.857607	0.142321	-0.220243	1.075	-0.605	0.0631418	-0.0305258	-0.0247614	0.317609	0.0115114	-0.204861	-0.264556	0.0204276	-0.0199051	0.0455176	0.0943191	-0.148997	0.0325097	0.39	0.0433333	-0.0302962	-0.71	-0.0740415	-0.208341	0.104601	0.210777	0.076	-0.7165
Aida	2.25965	0.903226		0.0868278	-0.0146253	0.227577	0.746644	1.0713	-1.30404	1.0942	0.0610288	0.216453	-0.0450934	0.155461	0.254207	0.315869	0.255244	-0.197611	-0.147282	-0.127578	-0.154142	-0.291244	0.0924779	0.113333	0.35	0.128798	0.00333333			0.11069	-0.301066	-0.0085	0.4575
Aif1	0.195801	1	-0.170859	2.39079	-1.71621	-0.849583	-0.906891	4.28359	0.235	-0.27	-0.15918	-0.0258131	0.0117082	0.112477	0.389365	-0.000368952	-0.0643478	0.216641	0.108041	-0.126764	0.0518687	0.0881787	-0.0132524	0.143333	0.443333	0.0515023	0.11	0.0851302	-0.0784061	-0.0309601	0.106301	0.055	0.132
Aif1l	1.75587	1	-0.089096	-0.169625	-0.107807	-1.32533	0.727418	-0.195556	-0.729296	-0.871582	1.69973	1.002	2.26046	-0.223241	-1.53055	0.27627	-0.8748	0.85991	0.620571	0.493909	0.381659	-0.0975627	0.171729	-0.00333333	-0.0833333	-1.04202	0.873333	0.349105	0.623606	0.706563	-0.203484	0.097	0.376
Aifm1	2.30167	1	-0.630304	-0.50659	0.182425	-0.613852	0.426768	-1.55702	-2.48	0.935	-0.161023	-0.243149	-0.0718049	0.0925871	0.497924	0.0980769	0.471067	0.0609094	-0.264223	-0.254301	-0.0580551	-0.0604602	0.212889	-0.1	-0.33	-0.0648245	-0.0533333	-0.211118	0.145632	-0.377136	-0.183234	0.142	0.212
Aifm2	0.368709	0.870968	-0.175022	-0.496983	-0.0750817	-0.472178	-0.193528	0.253644	-0.146542	-0.568748	-0.0091279	0.0620722	-0.0964612	0.207503	0.11988	0.167674	-0.0588584	-0.108577	-0.092345	-0.10307	0.182957	-0.192688	0.0467626			0.267606	0.12			0.206426	0.513627	0.1915	0.439
Aifm3	0.112292	0.870968	0.0590715	-0.204165	-0.56485	-0.876726	0.396233	-0.284731	-0.0761666	-0.517824	0.147362	-0.246081	-0.0550209	0.0376683	-0.250707	-0.45974	-0.242387	0.122924	-0.0273305	0.0254907	-0.00821503	0.929489	-0.0413202			-0.085769	-0.05			-0.150276	0.0293134	0.001	-0.722
Aig1	0.591976	1	0.286256	-0.0320816	0.216286	0.523454	0.995211	-0.139297	-0.6	-0.605	-0.152318	-0.118302	0.0392624	-0.0807691	-0.909503	-0.139876	-0.0426647	-0.0155552	-0.0413795	0.378725	0.474655	-0.119502	-0.126328	-0.21	0.253333	-0.590453	0.533333	0.273752	0.7232	0.940542	0.616193	0.197	0.0805
Aim1	0.982741	1	-1.48046	-0.411732	-0.072857	-0.337865	-0.243776	-3.80881	-2.135	0.475	-0.426194	-0.35532	-0.89327	0.0759811	0.349376	0.0248322	-0.0396096	0.0370661	0.0714853	-0.142481	-0.357926	0.0649581	-0.458364	-0.04	0.116667	-1.15202	-2.75667	-0.565758	-1.11912	-1.43531	-0.234084	-0.129	0.44
Aim1l	0.276689	0.806452		-0.803461	0.575115	-0.714223	-2.08573	-0.67478	0.94	-1.44	0.323209	-0.27958		-0.1277	-0.118296	-0.0946004	0.0825157	0.0929756	-0.0640159	0.0251712	0.0476773	0.0577815	-0.0634346			0.102895	-0.306667			-0.052098	0.155612	0.184	0.133
Aim2	0.206904	1	-2.49517	-2.40028	2.86507	-0.0617762	1.87447	0.750798	0.01	-0.08	0.745163	0.417284	0.127467	0.230931	0.479307	-0.0491818	-0.28611	0.25865	0.097325	-0.166507	-0.357573	0.00884223	-0.946038	0.05	-0.39	-0.0390021	-0.00666667	0.145258	-0.0596322	-0.0966952	-0.0476137	-2.411	-1.599
Aimp1	2.82179	1	-0.655989	-0.277841	-0.0341986	-0.272017	0.358972	-0.444843	0.685	1.49	-0.192814	-0.258764	0.137633	0.119734	0.414924	0.188999	0.381254	-0.0942908	-0.00833552	0.0225698	0.151174	-0.206529	-0.184347	0.39	0.333333	-0.0195222	0.01	-0.0413372	0.0154776	0.0671811	-0.149327	-0.172	-0.575
Aimp2	2.27184	1	-0.274212	-0.365318	0.127458	0.0631928	0.537154	0.329174	-0.0916974	-1.38227	-0.159334	-0.107972	0.282585	-0.301933	0.136152	0.161491	0.539215	-0.207635	-0.205047	-0.168642	0.0836494	-0.382922	-0.344439	0.103333	-0.18	0.28675	0.113333	-0.391889	-0.391446	-0.0213249	-0.916999	-0.204	-0.688
Aip	1.91931	1	-0.245602	-0.297264	-0.0510321	0.748873	0.0897625	-0.00182667	0.93	-0.675	-0.194635	-0.136202	-0.182004	0.31764	0.357096	0.0940132	0.441385	0.00949623	-0.0614414	0.00708485	0.0515062	0.13928	0.0805572	-0.296667	-0.04	-0.24336	3.20343e-16	-0.15	0.00622092	-0.0117822	-0.222509	0.1895	0.18
Aipl1	0.154873	1	0.306983	0.478691	-0.237827	1.2561	-0.986408	-0.342969	0.828953	0.259001	-0.0569279	-0.0528894	-0.241212	0.167936	0.0084369	-0.191227	-0.285133	0.24706	0.150531	-0.129428	0.10045	0.0704992	-0.0720792	0.11	0	0.0346298	0.0866667	0.0549483	-0.0283562	0.0348375	0.0821343	0.039	0.222
Aire	0.195952	1	0.546489	-0.302563	-0.0759489	-0.270089	-0.369234	-0.184865	1	0.14	0.0908192	-0.222873	0.0109303	0.205592	0.000173911	-0.203031	-0.567041	0.148297	-0.167398	-0.0739443	0.0775437	0.00992917	-0.0458351	0.0533333	-0.0166667	0.0432718	-0.0533333	-0.094823	-0.107842	-0.244624	-0.135888	0.1115	-0.2495
Ajap1	0.109437	0.806452		0.173096	0.319747	0.18405	1.06794	-0.0632409	0.81659	0.0221641	0.071957	-0.158763		0.0811488	-0.322673	-0.231436	-0.409788	0.171693	-0.0431576	0.100424	0.238735	-0.00704637	0.0534556			0.0103167	0.126667			-0.0987284	-0.136635	-0.0135	-0.215
Ajuba	3.01486	1	0.0197598	-0.181712	-0.0606093	-0.0708136	0.195524	-0.699357	-1.54	-1.235	0.426902	0.0606441	0.174666	-0.105175	-0.125528	-0.0265726	-0.382749	0.174709	0.121882	-0.0507849	-0.0908156	-0.13783	-0.427077	0.143333	-0.176667	-0.410796	0.0733333	-0.144143	0.265426	0.223253	-0.123723	0.084	-0.551
AK010878		0.0645161																														0.048	0.152
Ak1	1.98629	1	1.33608	-0.527667	0.997007	1.91045	0.359548	0.706832	-0.382241	-0.444853	2.6608	2.7364	0.445943	0.384765	0.566495	0.203693	0.0214686	1.22331	0.285152	1.96704	2.02121	0.0510373	0.528426	-0.196667	-0.17	0.637073	0.49	4.4211	4.04284	1.75819	0.915262	-0.153	0.61
Ak2	2.22684	1	-0.432585	-0.426005	-0.0617445	-0.388	0.574259	-0.398662	-1.15186	-0.884559	-0.292155	-0.0278699	0.156487	0.0133994	0.206603	0.136414	0.492228	-0.118178	-0.344382	-0.271271	-0.054083	-0.610493	-0.136184	0.06	0.0933333	0.278043	-0.06	-0.363027	-1.05277	0.241392	-0.902146	-0.164333	0.063
Ak3	4.05366	1	-0.652134	-0.284492	-0.252717	-0.771954	0.307496	-1.11645	-0.674768	1.10677	-0.158501	0.0980916	-0.568768	0.0198449	-0.0135192	0.157013	-0.00292565	0.0247348	0.0232211	-0.10803	-0.140704	0.296049	0.141427	-0.0266667	-0.0133333	-0.538401	-0.843333	-0.112535	0.152157	-0.842325	-0.322185	-0.114	-0.42
Ak4	0.511413	1	0.586554	-0.614948	0.962673	0.900823	1.1999	0.311361	0.423512	-0.180256	-0.02385	-0.105889	0.0904791	-0.0234448	-0.206303	0.623754	0.118089	0.0727478	0.01745	-0.0292368	0.148755	-0.277907	0.662728	-0.19	-0.13	-0.442897	-0.476667	-0.063137	-0.189773	0.0408551	-0.231991	-0.0715	-0.4075
Ak5	0.345038	1	-0.64576	-0.040784	0.892687	-1.14341	-0.872884	0.10382	0.626247	0.513408	-0.0950367	-0.091268	-0.46286	-0.089383	-0.00859712	0.0496493	-0.234163	0.288129	-0.0287035	-0.31498	-0.268545	0.0362582	-0.216295	0.0566667	-0.313333	-0.766275	-0.253333	0.0440777	0.150291	-0.335118	0.667932	0.729	1.551
Ak6	0.136959	0.0322581											-0.00516962
Ak7	0.0680902	0.806452		-1.71621	-2.94278	0.527247	1.96627	0.150033	0.555	-0.28	0.019419	0.0339818		-0.0150663	-0.199724	-0.121665	-0.174982	0.0901083	0.0602664	-0.0524069	-0.0194788	0.161879	0.00399668			0.0468748	0.21			0.211843	0.225789	0.441	0.174
Ak8	0.0818151	0.83871		-0.967135	0.541512	1.24891	0	0.330125	0.33	0.22	0.000563985	-0.163895	0.0806796	0.118766	-0.0761814	-0.9251	-0.0596445	-0.106977	-0.178921	-0.182493	0.0982614	0.0631424	-0.0284924			-0.0454677	0.0833333			0.338709	0.229495	-0.177	0.027
Ak9	0.0769653	0.516129									-0.0229342	-0.0590253		0.0398477	-0.119287	-0.0257143	-0.12605	0.0425601	-0.0629955	0.0128826	0.0471233	-0.16119	0.0485262			0.0278981	-0.02					-0.928	-0.24
Akap1	0.828453	1	-0.474011	-0.3348	-0.595462	-0.1738	-0.174008	-0.283511	-0.633693	-0.439395	-0.114196	-0.259949	0.016782	-0.0270132	0.142276	-0.160186	0.0719936	0.129191	-0.303395	-0.512311	-0.227806	0.035616	-0.00501109	-0.0633333	-0.08	0.117648	0.136667	-0.330193	-0.0835359	-0.312297	0.12612	-0.2335	-0.625
Akap10	0.716113	1	-0.377819	-0.498214	-0.352364	-0.460635	0.0905781	-0.178115	-0.457392	0.379434	0.0718792	0.0741149	0.119954	0.0450293	0.00385129	-0.0133906	-0.016225	0.0351549	0.135603	-0.058453	-0.159927	-0.0081491	0.0226197	-0.313333	-0.17	0.0642629	0.0333333	-0.0989761	-0.150703	-0.0169137	0.16854	0.200667	-0.026
Akap11	1.302	0.806452		-0.153187	-0.599462	-0.158921	0.481258	-0.71632	-0.79	-0.13	0.0381665	-0.216788		0.22091	0.313175	-0.0329017	-0.0116377	0.231553	-0.0341007	-0.264521	-0.431566	0.0319748	-0.0395156			0.524262	0.15			0.661047	1.00229	-0.537667	0.518333
Akap12	1.4206	1	0.471661	-0.251412	-0.751084	0.58992	0.945766	-3.95935	-0.5	2.48	0.61066	-0.70417	1.00177	-0.0855014	-0.264602	-0.227538	-0.055296	-0.0593496	-0.0812022	0.0892219	0.157739	-0.090353	0.929006	0.143333	-0.0733333	0.544037	0.686667	-0.0313938	0.35677	1.31206	-0.745241	-0.6555	0.4315
Akap13	0.505064	0.806452		0.0713075	-0.316185	-0.481013	0.121445	0.302574	0.0795566	0.0990507	-0.119611	0.159409		0.58646	0.6217	-0.00911819	0.247065	0.0751137	0.353183	-0.107862	-0.305501	0.835174	0.713173			0.364479	0.0166667			0.234077	0.714526	-0.32475	0.13125
Akap14	0.0744102	0.83871		-1.52962	0.120016	-0.456378	0.670692	0.026145	0.735	-0.17	0.0382043	-0.043178	-0.0565621	-0.0544587	-0.0927961	-0.0360336	-0.116071	0.0372766	0.0129756	-0.107664	0.166493	-0.0600363	-0.0799207			0.119878	0.126667			-0.0544786	-0.127438	1.017	1.231
Akap17b	0.2997	0.935484		-0.545626	1.43483	-0.426736	1.33237	-1.01294	-0.493665	-0.132157	0.132643	0.131213		-0.120691	-0.212406	-0.11071	-0.142339	0.0743844	-0.0886532	-0.0216629	-0.0877458	0.199877	-0.00454662	0.27	0.326667	0.0156387	0.04	-0.0627985	0.0390751	0.22712	-0.378581	-0.162	-0.2315
Akap2	0.780826	0.935484	-0.972532	-0.278999	0.172727	0.133054	0.807053	0.694188	-1.04	0.17	0.405829	0.101261	-0.194557	0.158487	0.814763	0.211724	0.0540004	0.144661	0.335025	-0.00214347	-0.181716	0.0837048	-0.113542	0.04	0.216667	-0.19314	-0.79			1.18217	2.04157	-0.0175	-0.0015
Akap3	0.0836041	1	0.157605	-0.30517	0.0860661	-0.78952	0.664251	-0.0964439	0.363809	-0.368756	-0.00200303	-0.0379291	0.119494	0.0136414	-0.108473	-0.302561	-0.251687	0.157366	-0.136348	0.0351259	0.135482	-0.276092	-0.0352556	-0.0466667	0.193333	0.0118346	-0.00333333	0.110066	-0.0179177	0.0484352	0.0286205	-0.13	-0.113
Akap4	0.0918872	1	0.448731	0.23796	-0.084286	0.112487	1.11454	0.174377	0.222636	0.0329279	-0.0154709	-0.0207108	-0.0319015	0.175636	-0.14219	-0.055753	-0.272035	-0.0305542	-0.022188	0.071402	0.121492	-0.0155625	-0.00937188	-0.103333	0.0433333	0.0542557	0.14	-0.00508739	-0.116163	0.0229834	0.00253969	-0.9625	0.44
Akap5	0.100159	0.806452		-0.533592	0.804899	-0.524344	-0.831747	0.219369	0.512515	-0.146397	0.0489557	-0.234023		0.135613	0.186232	-0.0556545	-0.38178	-0.108478	-0.151555	-0.263279	-0.152242	0.0295008	0.0137475			-0.0827309	0.0533333			-0.0775601	0.0673428	-0.992	-0.623
Akap6	0.0885649	0.870968	0.861826	-1.01524	0.660627	-0.480243	-0.129553	0.677924	0.729477	-0.0681837	0.799947	0.775145	0.0209258	0.259038	-0.140523	-0.0467875	-0.229303	-0.268206	0.451869	0.303733	0.215911	0.00816827	-0.05618			0.132664	0.0133333			0.142683	0.450736	0.1525	-0.048
Akap7	0.370436	0.870968	-0.739099	-0.388797	0.0682485	-0.97796	0.521666	0.342971	-0.202818	0.180186	0.174723	0.180966	-0.454724	0.074181	-0.136428	0.0702382	-0.12178	0.878647	0.4006	-0.383596	-0.564973	0.649646	0.300131			-0.604971	-0.33			-0.371492	0.0928098	-0.425	-0.676333
Akap8	2.0489	1	-0.174025	-0.327061	-0.43684	-0.247021	0.568913	-0.446216	-1.60992	0.833463	0.0231717	-0.0817123	0.141808	-0.106659	-0.0981895	-0.158298	-0.235571	-0.0158537	-0.026817	-0.247037	-0.385856	-0.195	0.169118	-0.16	-0.0766667	-0.103048	0.0266667	-0.120007	-0.117746	-0.0113258	-0.571479	-0.117	-0.155
Akap8l	0.636784	1	-0.164274	-0.651446	-0.683845	-0.744929	-0.139394	-0.0637417	0.415	0.48	0.0251339	0.0968014	0.0145712	0.260769	0.0241606	-0.209378	0.0129808	-0.189448	0.0997149	-0.0394519	0.0753462	0.511954	0.0939842	0.163333	0.17	0.0707889	0.213333	0.328114	0.564489	-0.0134869	0.25277	0.112	-0.012
Akap9	1.14274	1	-0.624306	-0.250333	0.0515602	-0.170186	0.136133	-0.798876	0.0967461	0.717609	-0.0303795	-0.186946	0.026143	0.187437	0.180039	-0.29092	-0.199856	0.283828	0.228823	-0.367849	-0.545562	0.33029	0.0764846	-0.336667	0.133333	0.0901953	0.253333	-0.129893	0.200831	-0.401147	0.148716	-0.184	0.011
Akip1	0.838396	1	-1.28532	-0.31139	-0.324059	-0.368535	0.0394188	-1.28154	-1.35	0.715	-0.560049	-0.0663492	-0.0239972	-0.083681	0.200694	0.283482	0.177258	-0.486601	-0.411099	-0.443957	-0.244833	-0.00759158	0.29642	-0.01	0.12	0.295345	-0.16	-0.713091	-0.552147	-0.509643	-0.992722	-0.516	-0.182
Akirin1	1.89822	0.83871	0.0108987	-0.390235	0.593788	-0.247812	0.387754	0.39583	-1.75691	0.747258	0.223814	0.123127		-0.00432608	-0.0455716	0.321693	0.361327	-0.341583	-0.141116	0.254599	0.208367	-0.0650529	-0.343899			0.180595	0.11			0.37431	0.402884	-0.225333	-0.704667
Akirin2	1.97328	0.967742	-0.174505	-0.883343	0.129507	-1.0946	-0.701496	0.241181	-0.0729955	-0.711401	0.297916	-0.101875		0.0490856	-0.00527035	-0.06367	-0.0908648	0.0278997	-0.0765069	-0.0108765	0.090551	0.0224014	-0.204807	0.0466667	0.316667	-0.13292	-0.09	-0.0325131	0.277419	0.15272	0.204597	0.001	0.089
Akna	0.351783	1	0.269001	2.80603	-0.174101	0.505697	2.07743	1.09522	0.330864	-0.419883	0.432438	0.26884	0.376256	-0.0967316	0.229691	-0.237977	-0.089651	0.0795818	0.086733	0.206042	0.13816	0.0815704	-0.0905091	-0.03	-0.206667	0.244293	0.29	0.127854	0.0605225	0.402911	0.0249211	0.123	0.02
Aknad1	0.155878	0.83871	0.126482	-0.303171	-0.155278	-0.279436	1.51314	0.699968	0.575	0.32	0.271439	0.0988143		-0.010574	0.108426	0.0178949	-0.20387	0.162402	-0.0510461	0.05968	0.0910559	-0.00693655	-0.000751259			-0.0200754	-0.09			0.077426	0.0115201	-0.1775	0.0315
Akp3	0.282423	1	0.37802	-0.132028	0.0747678	3.87447	2.75633	-0.352097	0.975	-0.255	-0.0412064	-0.365847	0.00438678	0.11208	-0.0107634	-0.0128462	-0.0391614	0.152577	0.192194	0.231705	0.0874005	-0.0781912	0.0152504	0.75	0.21	0.0390661	0.11	0.491631	0.194072	0.379453	0.0120053	-0.324	-0.235
Akr1a1	11.1242	1	0.00246819	-0.156555	-0.086271	-0.0907463	0.328266	0.330677	-0.21295	-0.411594	0.208818	0.254918	0.0863559	-0.0135162	0.0836096	0.0941747	0.230849	0.0430369	0.00517336	-0.0444164	0.147281	0.0507528	0.120409	0.06	-0.01	0.0873225	-0.0633333	0.0417094	0.195116	0.0640914	0.453131	0.172	0.323
Akr1b10	0.753952	0.870968	-0.639076	0.921216	-0.537738	-0.0761601	-0.240479	0.0564021	0.196528	0.183494	0.130258	0.332686	-0.0658583	0.0905621	0.583259	0.0718581	0.30896	0.24434	0.318884	-0.0615487	-0.0845175	0.468006	0.149907			-0.142705	-0.24			0.166239	0.540015	-0.0395	0.508
Akr1b3	5.73865	0.83871		-0.257836	0.178215	-0.189869	0.507127	1.0262	-0.409901	-0.133843	1.26819	0.945012	1.5232	-0.0410557	0.166271	0.16383	0.142832	-0.399314	0.292765	0.644781	0.604516	-0.331593	-0.0389442			0.259181	-0.08			0.0793455	-1.08983	0.027	0.4595
Akr1b7	0.136956	1	-0.359946	-0.448424	-0.23017	-1.0785	-0.318682	-0.5312	2.47	0.805	-0.131129	0.12636	-0.488431	-0.194057	-0.0263999	0.00288955	-0.0368024	-0.304493	0.0111417	-0.0735237	-0.163961	-0.0286425	-0.520516	0.08	0.12	0.0779746	-0.26	0.117482	-0.16093	-0.270348	0.079603	-0.081	-0.123
Akr1b8	2.53396	1	-0.624155	-0.383624	0.117588	-0.152243	0.213535	7.1702	0.11	1.765	0.566033	0.630218	-0.1992	0.318765	0.850853	0.589846	0.911543	0.215611	0.517149	0.211028	0.277757	-0.187593	-0.201551	0.143333	0.353333	0.284799	-0.0966667	0.0976504	0.103549	-0.327893	-0.277425	0.075	0.595
Akr1c12	0.726007	1	-0.933509	1.40382	-0.715061	0.182022	0.0707841	1.09652	-1.45	1.455	0.715949	0.662225	-0.0623766	-0.0538486	0.158845	-0.272352	0.202118	1.12952	0.117164	-0.568274	-0.614338	-0.00106017	0.123672	0.193333	0.376667	0.008429	-0.0633333	0.103528	0.123612	-1.712	-1.0405	-0.731	1.651
Akr1c13	0.75751	0.967742	-0.548959	1.29278	0.186309	0.757516	0.573896	1.33391	-1.895	1.29	0.283227	0.283927		0.00303696	-0.141563	-0.000737594	0.118373	0.547031	0.205548	-0.639935	-0.55024	-0.122985	0.0132573	-0.0333333	0.363333	0.021656	0.666667	-0.248926	0.218117	-1.48622	-0.843983	-0.768	2.01
Akr1c14	0.26286	1	-2.78619	-0.874469	-4.06301	-1.61471	-1.44839	-0.0655133	-1.455	-0.13	-0.411322	-0.870627	0.1171	-0.182277	-0.473139	0.123587	-0.64625	1.4631	0.278997	-2.02477	-2.10584	0.185159	1.2056	0.0366667	0.0333333	0.117913	-0.8	-1.8838	0.676868	-2.5029	0.0607359	0.672	0.415
Akr1c18	0.802647	1	-1.62253	-0.190103	-3.74183	1.99476	-1.98366	1.64346	0.005	-0.64	-2.8359	-2.3801	-0.0835594	-2.39943	-1.70719	-1.51945	-0.491527	-1.50883	0.30754	-0.651205	-0.427382	0.0359109	-0.101238	-0.03	0.0366667	0.0236857	0.0433333	-0.0394656	-0.211006	-0.586057	0.601069	0.178	0.363
Akr1c19	0.574084	0.870968	-5.77324	-0.0671142	-2.40198	-2.04439	-2.5502	0.204587	-0.995	1.11	-3.39733	-2.47151	-0.81644	-1.0243	-0.145912	-0.378308	0.649993	0.207679	0.215897	-3.32625	-3.324	-0.298799	0.104892			0.014293	-0.0166667			-4.42724	0.234316	-0.099	0.714
Akr1c20	0.0934016	1	0.119255	-1.09727	-1.08934	0.486244	0.734954	-0.052067	0.494526	-0.283185	-0.164263	-0.160279	0.0116517	0.0857376	-0.068589	0.0264661	-0.163108	-0.0792054	-0.0702429	-0.117934	0.166556	0.0494007	0.0577207	-0.343333	-0.0666667	0.0325746	0.13	0.0197148	-0.107463	-0.250325	-0.194248	-0.4035	0.2735
Akr1c21	0.125904	1	-0.1422	2.15781	0.848858	2.73909	-0.100481	-0.10092	0.365	0.285	-0.126514	-0.124324	-0.0437435	0.115559	-0.13123	-0.0303452	-0.195136	0.0273449	0.030714	-0.0874307	-0.0245903	-0.0625985	-0.0664043	0.436667	0.33	0.0954117	-0.0266667	-0.0925277	-0.0960985	0.0498645	-0.0100713	1.221	1.433
Akr1c6	0.146263	1	0.528471	-0.106915	-0.115477	0.196397	0.469485	-0.165058	0.485	0.095	0.02381	-0.0433518	-0.00492793	-0.041459	-0.0885479	-0.0161857	-0.139744	0.0433826	-0.0282373	0.190085	0.0723362	-0.0375216	0.0338291	-0.00666667	0.0733333	-0.0385624	0.0333333	-0.130612	0.0848393	-0.0212843	-0.1836	-0.3	-0.378
Akr1cl	0.0760411	0.935484	0.218814	1.26389	-0.302272	0.302563	1.41873	-0.0296835	0.173819	-0.130536	-0.112714	0.111023	-0.128361	-0.119431	0.23932	0.0927986	-0.0515819	-0.00407048	0.0398653	-0.275455	0.0388054	-0.06553	0.136555	-0.123333	-0.176667	0.0143071	0.0433333			0.0227729	-0.091899	0.604	1.556
Akr1d1	0.143731	1	0.249945	1.42239	-0.603003	2.88122	0.835906	-0.0536635	0.104526	0.0242205	-0.084382	-0.0351718	-0.0620437	0.0520063	-0.383221	-0.335554	-0.143714	0.186103	0.0248595	0.0252244	0.0827334	0.10045	0.188953	-0.156667	0.0166667	0.0444832	-0.0266667	0.0158432	0.0323181	0.0147948	-0.0806488	0.66	0.473
Akr1e1	0.737586	1	-0.680168	-0.103473	-0.503597	-0.853763	0.312024	-0.171772	-0.101009	0.151205	-0.151025	0.0664536	-0.137636	-0.0926984	0.176364	-0.0203958	0.12389	0.0671305	0.0107716	-0.287103	-0.173839	0.0113773	0.174324	-0.0866667	-0.1	-0.314448	0.00666667	-0.142754	-0.652261	-0.0737986	0.127388	0.097	0.363
Akr7a5	1.22783	1	-0.447685	1.0309	-0.366107	0.528224	0.158534	0.1248	0.207209	-1.54633	0.059859	-0.0638088	0.032942	-0.172107	0.0348163	-0.0326168	0.152985	0.263878	0.168256	-0.00960477	-0.0291712	0.0940374	0.319378	-0.116667	-0.203333	0.243547	-0.163333	0.157802	0.203837	-0.297496	0.0273919	0.008	0.196
Akt1	3.20958	1	-0.0543668	0.594479	0.263109	-0.91247	0.55067	0.623246	0.360808	0.287845	0.145928	0.208198	0.10216	-0.0278986	0.240853	0.215736	0.205118	-0.00411369	-0.0502628	-0.0741462	-0.00782213	-0.212063	0.104122	-0.18	0.09	0.189319	0.12	-0.0353196	0.109001	-0.00441485	-0.141304	0.011	-0.286
Akt1s1	1.76549	0.870968	-0.0269353	-0.254735	-0.0998625	0.140171	0.734919	-0.134077	0.740017	-1.24792	-0.0464986	-0.044512	0.0448063	0.0378617	-0.0443683	0.0105875	0.180676	-0.047782	0.15235	0.000308174	0.112888	0.102293	-0.220462			0.333376	-0.16			0.0429681	-0.192019	-0.087	-0.846
Akt2	2.3474	0.967742		-0.722437	-0.130715	-0.716624	0.513011	-0.0841294	0.841292	-0.510208	-0.114627	0.0590138	0.0279921	-0.0567101	-0.00780724	0.022298	0.0545434	-0.149647	-0.0783813	-0.0372392	0.0105567	-0.0873176	0.0860327	-0.41	-0.326667	-0.297236	-0.536667	-0.0810488	-0.118194	-0.0985353	0.197535	0.09275	0.16975
Akt3	1.37784	1	-0.370255	-0.033853	0.0404389	0.0709269	0.495149	-0.732573	-0.25471	1.31112	-0.0175853	0.00839243	0.260993	-0.0966427	0.648274	0.420225	0.768988	-0.195446	-0.351806	-0.143134	-0.171147	0.319399	0.0140959	-0.0266667	0.0233333	0.316	0.176667	-0.049411	0.142775	-0.626182	-0.386108	-0.068	0.337
Aktip	1.24012	0.935484	-0.614311	-0.425932	1.39518	-0.362945	0.182219	-0.837945	0.0840137	1.38045	-0.52554	-0.445463		-0.197789	-0.626735	-0.159051	-0.143231	0.147835	0.188858	-0.0877076	-0.144418	-0.0933018	0.0815475	-0.216667	-0.256667	-0.543777		-0.280076	0.394324	-0.252671	-0.0376287	-0.087	-0.865
AL117821		0.0645161																														-0.096	-0.261
Alad	4.10334	1	-0.46245	-0.474012	0.00482992	-0.463467	0.189302	1.16106	0.325	-0.98	-0.681747	-0.781352	-0.566244	-0.0887801	0.563585	0.119461	0.02364	-0.0978351	-0.345665	-0.407059	-0.241013	-0.459209	0.0727586	0.0233333	0.123333	-0.390161	-0.243333	-0.80125	-1.02924	-0.252893	-0.843209	0.018	-0.782
Alas1	1.16922	1	-0.388661	-0.160932	-0.122588	-0.280352	-0.056532	0.719717	0.637623	-0.0625632	-0.292043	-0.348282	-0.356773	-0.178296	-0.258096	-0.0803363	0.314811	0.0181799	0.0998399	0.0559369	-0.169051	0.12259	-0.0342532	-0.35	-0.0833333	0.640201	0.03	0.0625362	0.331274	-0.228961	0.00383373	0.0345	-0.0665
Alas2	0.120681	1	0.269875	-0.478047	-2	0.277534	1.71049	2.00158	0.445	-0.165	-0.00321376	-0.0516574	-0.0560061	0.14987	0.163376	0.0168292	-0.0364351	0.0443611	-0.118271	-0.0204581	-0.0924183	-0.0208695	-0.112059	-0.01	0.0733333	0.0237242	0.0266667	-0.078432	-0.0385166	-0.0127461	-0.212661	-0.668	-0.509
Alb	1.14061	1	-2.34502	0.301656	-0.857628	0.177305	-1.87883	0.109693	0.75	0.115	-0.030177	-0.126321	0.0480878	-0.0844077	-0.193499	-0.10315	-0.0635343	0.171631	-0.148145	-0.772149	-0.891318	0.0684505	0.730839	-0.153333	-0.286667	-0.02556	-0.00333333	0.0258727	-0.00543168	-0.360577	3.25108	0.356	-1.464
Alcam	1.45727	0.967742		0.432526	-1.25644	0.351658	0.342262	0.94871	-0.891004	0.5038	-0.844226	-0.261469	-0.297466	0.218246	0.806046	0.768026	0.420052	0.385273	-0.0433791	-0.223813	-0.186669	-0.0773915	-0.0585304	0.0266667	0.0933333	1.20589	2.02667	-0.0093953	-0.177335	-1.46059	-0.365334	-0.057	0.689
Aldh16a1	0.681754	1	-0.468174	-0.130048	-0.343347	-0.335709	0.45924	-0.10963	0.697695	-1.87331	-0.196675	-0.0524514	0.257274	0.159795	0.272277	-0.083969	0.16922	-0.14324	-0.330435	0.0520159	-0.0200731	-0.0596518	-0.00677425	0.11	-0.0766667	-0.190325	-0.176667	0.0161033	-0.277003	-0.236845	0.308303	-0.046	-0.09
Aldh18a1	2.11502	1	-0.0833515	-0.347573	0.507605	-0.218106	0.805913	-1.21673	0.669006	0.133978	-0.168067	-0.286499	0.707821	0.238996	0.542627	0.425569	0.535458	0.314597	0.559057	-0.263512	-0.211958	-0.146881	-1.56134	-0.126667	0.0533333	0.471724	0.316667	-0.401826	-0.058361	0.783114	0.32081	0.243	-0.378
Aldh1a1	1.88932	1	-3.87191	0.180572	1.45743	-3.82443	-3.60086	2.11156	-1.595	0.835	-2.69925	-3.46366	-0.73969	-0.663093	-0.0611806	-0.426898	-1.10889	0.799341	-0.180459	-1.05821	-0.681414	0.0855867	0.230587	0.18	0.256667	-0.0839262	0.00333333	-3.38455	0.0251646	-2.64814	-1.87232	-0.081	-0.391
Aldh1a2	0.0931877	1	0.01853	1.03562	0.450927	-0.25634	1.94486	2.45193	0.415	-0.175	-0.130153	-0.199943	-0.0832686	0.0290854	0.0273423	-0.0667027	-0.0363769	-0.119698	0.160187	0.102228	-0.126366	-0.0665944	0.0739425	0.163333	-0.176667	0.0427809	0.0666667	0.00308622	-0.00101162	0.101929	0.102814	0.158	0.309
Aldh1a3	0.196177	1	0.363117	-0.0190863	0.129894	-0.319259	0.559173	0.57163	0.63903	-0.144007	0.0307293	-0.323588	-0.113751	0.427511	1.23487	-0.124925	0.956517	-0.00183598	-0.139824	0.0548836	0.163183	-0.437267	-0.00869179	0.06	-0.02	2.51359	-0.00666667	0.0700481	0.0330487	0.0644506	0.0197741	0.004	0.351
Aldh1a7	0.696641	1	-0.822035	0.628031	0.442388	1.18587	-4.41465	-3.17749	-0.52	-0.005	-1.21163	-2.05402	-1.14472	-1.12098	-0.649	-1.18229	-0.844448	1.11381	0.0181905	-1.15775	-1.01106	0.594177	0.124383	0.473333	0.0766667	0.0661551	-0.103333	-1.90657	-0.170715	-0.182625	-0.545392	0.738	-0.396
Aldh1b1	0.137966	1	0.458385	-2.48452	3.14477	-3.31259	1.47063	0.70549	-0.005	-0.055	0.112039	-0.141459	0.158277	0.0183676	0.0230233	-0.0864532	-0.172453	0.186776	-0.106742	0.0316684	0.0429786	-0.0178626	-0.0058261	-0.163333	-0.24	0.0237408	0.07	-0.053019	-0.0979562	0.355788	0.466741	-0.104	-0.093
Aldh1l1	0.251993	1	1.20145	0.0687128	-0.447459	-3.37412	1.37851	-0.14287	0.22	-0.52	1.59434	1.34234	1.05863	0.168611	1.05313	0.423038	0.611824	-0.0405546	0.231673	2.39269	2.70657	0.0701515	-0.0741195	-0.0866667	-0.0233333	2.73761	0.88	0.964495	1.48441	-0.0507863	0.00741148	-0.083	0.127
Aldh1l2	0.424124	0.870968	0.0939186	-0.701896	1.2943	-0.277886	0.229052	-1.33713	0.235	-0.085	0.0811027	-0.250623	-0.0355176	0.370143	0.357934	-0.0355976	-0.224124	0.120865	-0.0892096	-0.0798028	0.266171	-0.0149865	-0.480728			0.471728	0.38			0.231486	0.171526	0.059	0.22
Aldh2	3.0731	1	-0.379621	-0.29402	0.0834268	-0.43727	0.785208	-1.41146	1.62894	0.714663	-0.0585549	0.204514	-0.18026	-0.0821889	-0.175358	0.00268424	-0.00436522	0.149402	0.317524	-0.0594907	-0.0630316	1.47201	0.243525	-0.0433333	0.0766667	-0.38176	-0.15	-0.0187463	-0.106142	-0.172743	0.625593	0.029	0.846
Aldh3a1	0.957337	1	-1.8551	-1.21328	-0.154247	-0.233059	-0.978085	-1.03629	-0.55	-0.055	-2.21932	-3.2128	-2.99524	0.242572	1.17279	0.226554	-0.0670118	-0.158493	-0.319187	-0.83946	-0.977609	-0.126029	-0.21259	-0.233333	-0.0133333	-2.79005	-3.63333	-0.125439	0.000280043	-0.645755	2.0832	0.0855	0.793
Aldh3a2	1.91789	1	-1.08137	-0.290668	-0.0550729	-0.485777	0.13078	-1.8671	-2.43	0.825	-0.631817	-0.598903	-1.6988	-0.0599612	0.207927	-0.058841	0	-0.295695	-0.23896	-0.432802	-0.654859	0.570543	0.229133	0.0533333	-0.0233333	-0.41699	-0.236667	-0.30309	-0.0669069	-0.747907	0.274949	0.062	0.137
Aldh3b1	0.875628	1	-0.508169	-0.332415	-0.797154	-1.47612	0.0196148	-0.104138	0.39	-0.975	-0.239471	-0.0540086	-0.489525	0.100633	-0.370333	-0.208313	-0.0882061	0.301725	-0.269976	-0.348589	-0.425647	0.976708	0.418446	-0.00333333	-0.01	0.611865	-0.38	0.0239454	-0.182651	-0.347205	0.189797	0.505	1.116
Aldh3b2	1.38476	0.83871	-0.0467022	-2.19941	-0.881944	0.38616	0.320878	0.250048	0.84	0.12	0.0582438	-0.0516525		-0.14765	-0.905523	-0.16921	0.352683	0.0721266	-0.0979293	0.211991	0.307375	0.118192	0.0986506			0.0771212	-0.383333			-0.0495191	-0.159528	-0.189	-0.193
Aldh3b3	0.790581	0.83871		0.269605	0.26555	-0.684151	0.313538	-0.0939232	0.299993	-0.21667	0.0117806	-0.144433	-0.125164	-0.0119129	-0.107922	0.101833	0.624678	0.22663	-0.269119	0.103559	0.183901	0.0954215	0.116032			0.0382121	-0.22			-0.111594	-0.113037	0.746	0.552
Aldh4a1	0.596883	1	-0.592935	-0.434578	-0.313096	-0.761907	0.293621	-0.52221	0.315	-0.415	-1.46651	-1.58801	-0.740582	0.0359052	-0.142027	0.331744	-0.0279846	-0.857736	-0.85879	-0.436074	-0.488937	0.203356	0.794189	-0.14	0.00666667	0.305927	0.16	-0.110608	-0.138706	0.306277	0.613601	-0.06	0.05
Aldh5a1	0.148196	0.870968	0.20315	-0.103476	-0.162046	-1.21514	-0.0591131	-1.05582	-0.345	-0.145	-0.0443325	0.00477774	-0.125409	0.0470888	0.203975	-0.0432567	0.137239	-0.100968	-0.0125034	-0.0732572	-0.123825	-0.16644	0.284899			-0.522428	-0.01			-0.140853	-0.338553	-0.117	-0.123
Aldh6a1	0.697345	1	-0.800811	-0.464838	-0.199602	-1.18055	-0.137105	-2.34319	-1.45	0.22	-0.545772	-0.0199666	-1.02341	-0.0437435	-0.135273	0.0780171	-0.217866	0.375685	0.17071	-0.376432	-0.473325	0.982717	0.518913	-0.11	-0.193333	-0.00595983	0.0666667	-0.202486	-0.264233	0.414912	3.1055	-0.3225	0.4345
Aldh7a1	0.860466	1	-0.082182	1.18282	0.111438	-0.565114	0.862307	-0.260893	0.397772	-0.126926	-0.0186755	0.162462	-0.155541	0.0545796	0.0608709	0.383683	-0.0793595	0.0360453	-0.00623921	0.246912	0.204955	-0.0758869	0.151642	0	0.246667	0.25838	0.506667	0.136037	-0.0467695	0.307743	0.265937	0.0395	-0.0485
Aldh8a1	0.0754751	0.967742		-0.120249	-0.26638	0.195449	1.30921	-0.140883	0.486307	0.0284127	0.00761929	-0.174251	-0.00705891	0.123347	0.0823735	-0.257855	-0.120063	0.0134241	-0.0889849	0.0619936	0.110867	0.0848892	-0.0207033	-0.21	-0.0566667	0.00591978	-0.1	-0.0790874	-0.134007	-0.0353739	0.00956317	0.047	0.084
Aldh9a1	2.049	1	-0.763859	-0.18898	-0.145191	-0.625513	0.495292	-0.0146473	-0.324575	0.518193	-0.345406	-0.208754	0.0383679	-0.21799	-0.0741911	-0.196085	-0.172252	0.265934	-0.0132931	-0.246292	-0.370928	0.213659	0.25475	-0.12	0.00333333	0.0691441	0.23	-0.380682	-0.132987	-0.463579	-0.541661	-0.06	0.253
Aldoa	10.8395	1	-0.123757	-0.32084	0.597728	-0.233233	0.469598	0.395518	0.617229	-0.268368	-0.487762	-0.267487	-0.720211	0.189668	0.0434546	0.25514	0.317907	-0.0614597	-0.12263	-0.0617241	-0.0204743	-0.0188412	-0.0235863	0.126667	-0.123333	-0.183367	-0.146667	-0.155116	-0.11658	-0.0848417	0.157939	0.117	-0.294
Aldoart1	0.260437	0.516129									-0.669192	-0.100095		0.0777564	-0.231099	0.2476	0.298291	-0.0626693	-0.0340353	-0.13718	0.076579	-0.143937	-0.143482			-0.0167322	-0.29					-0.221	-0.125
Aldoart2	0.191159	0.935484		-0.170335	-2.70941	0.0307623	0.686746	-0.178343	1.08	-0.35	-0.105079	-0.252438		0.193003	-0.173279	-0.0402712	-0.440606	-0.050782	0.117589	0.00133646	0.224567	0.0332755	-0.0833903	0.0266667	0.01	0.114919	0.00666667	0.0832152	0.00612411	-0.0598516	-0.101641	0.302	0.188
Aldob	0.160707	1	-0.296843	-1.45943	2.00529	-0.402759	4.29391	0.10854	0.555	0.29	-1.12082	-1.25091	-0.376289	0.00127344	-0.167078	0.167339	-0.139945	0.0506346	0.00705256	-0.573603	-0.547718	0.082585	0.626633	-0.156667	-0.246667	-0.129524	0.1	-0.11846	-0.311977	-0.00407743	0.0975156	0.735	-1.483
Aldoc	1.22431	1	-0.209194	-0.819381	1.30284	-0.945484	-0.82081	-5.07435	0.450977	0.0125472	-1.90858	-0.859523	-1.37253	0.148916	-0.19276	-0.0260517	0.217469	-0.730202	-0.523771	-0.362642	-0.298264	0.0451168	-0.335374	0.173333	0.18	-2.47572	-0.343333	0.3216	0.0375691	-0.298176	-0.211484	0.254	0.535
Alg1	1.24813	0.935484	-0.215776	-0.423685	-0.572198	-0.148639	-0.0142495	-0.82929	-0.68	-2.185	-0.196532	0.0483653	0.107182	0.0800599	0.00271958	0.0282218	0.0953475	-0.100302	0.0696963	-0.0524993	0.0691349	-0.11047	0.118008			-0.275805	-0.123333	0.16665	0.0662583	0.167737	0.764009	0.038	0.139
Alg10b	2.61403	0.83871		-0.27122	0.247667	-0.499775	0.714019	-0.490788	-1.25618	0.317995	-0.0273185	-0.128432	0.279115	-0.0295979	0.245308	-0.124453	-0.0693102	-0.118409	0.0219925	-0.148639	-0.222729	-0.101129	-0.290466			0.0292358	0.2			-0.334154	-0.460603	-0.155	-0.545
Alg11	0.82984	0.83871	-0.675287	-0.457181	-0.0795167	0.14612	0.388847	-0.916178	-1.43834	0.142463	-0.323878	-0.117278		-0.0816765	-0.227327	0.0409212	0.0494497	0.291657	0.474639	-0.316076	-0.323306	0.271745	0.210159			0.27593	0.0833333			-0.111335	0.148861	-0.076	-0.215
Alg12	0.887307	1	-0.492485	-0.43815	-0.290919	-0.477602	-0.0342895	-0.328292	1.11161	-1.08395	-0.0176987	0.105408	-0.196192	-0.155892	-0.18408	-0.220637	0.233029	0.00845925	0.14924	0.149763	0.0303234	0.353802	0.233565	0.06	0.166667	0.065924	0.0833333	-0.0953358	-0.0106217	-0.079559	0.19561	0.079	-0.394
Alg13	0.27764	1	-1.36193	-0.315213	0.126336	-0.241008	0.745899	-1.59568	-3.315	0.515	-0.546909	-0.460346	-0.0511779	-0.136646	0.126978	-0.110415	0.26358	0.139006	0.146492	-0.425425	-0.321887	-0.504652	-0.323999	-0.116667	0.186667	0.213115	0.3	-0.47438	-0.6541	-0.00101638	-1.30863	0.1855	0.1725
Alg14	0.720535	1	-0.273921	-0.745048	-0.149029	-0.0648456	0.0438573	-0.624324	-0.555126	-0.157187	0.103518	0.181017	-0.0126421	0.05468	0.0643445	0.0607704	0.0865491	0.361383	0.208539	-0.00284374	-0.169348	-0.351637	-0.161819	-0.0233333	0.173333	-0.230364	-0.11	-0.107888	-0.279469	-0.0716704	-0.280007	-0.0985	-0.6615
Alg2	1.1563	1	-0.204185	2.33822	0.190784	-0.17686	0.639614	-0.0256061	0.0290509	-0.408817	0.152145	0.0731629	0.104498	-0.0731401	-0.105649	0.274367	-0.00653097	0.664538	0.964094	0.254554	0.0538346	0.689503	-0.20297	-0.293333	-0.06	0.682651	0.0166667	0.292581	0.380328	0.281826	0.139319	-0.069	0.176
Alg3	2.71718	1	-0.275343	-0.450984	-0.0119113	-0.449247	0.575986	-0.626922	-0.745	-1.21	-0.0653962	0.155154	0.0854947	-0.435461	-0.426508	-0.293001	-0.0829465	0.0419153	-0.00837285	0.0989415	-0.192321	-0.341187	-0.382931	0.0533333	-0.103333	-0.045987	0.113333	-0.357185	-0.387397	-0.0237608	-0.418401	0.082	-0.013
Alg5	1.19685	1	-0.149906	-0.293289	-1.13813	0.261439	0.241077	-0.474037	-0.0351288	-0.674134	0.541726	0.252374	0.16993	-0.157432	0.059381	-0.0809554	0.513655	0.390063	0.443971	0.0114191	0.209016	0.050141	-0.0625435	0.116667	-0.0566667	0.419152	0.176667	0.0663844	-0.071776	-0.129925	-0.273881	-0.096	-0.043
Alg6	0.390758	0.83871		-0.658275	-0.211679	-0.712332	0.714511	-1.55381	-1.065	0.145	-0.375435	0.0467212	-0.0395973	-0.215493	0.0132621	-0.636119	0.0245302	-0.279792	-0.112791	-0.371133	-0.668356	-0.523657	-0.11879			-0.360022	0.0366667			-0.16712	-0.471002	-0.16	-0.228
Alg8	1.20224	0.870968	-0.522986	-0.460361	-0.156163	-0.215579	0.41925	-0.837322	-0.505	-0.18	-0.209589	-0.266219	0.104128	-0.268005	0.0551877	-0.0807867	0.215813	-0.195871	-0.189237	-0.350444	-0.463086	-0.275672	-0.319041			0.135218	-0.16			-0.359851	-0.312736	-0.1315	0.026
Alg9	1.28942	1	-0.00383188	-0.00786903	1.58873	0.912301	-0.0912691	-0.136347	0.118818	-0.305675	-0.202915	-0.0911045	0.0592869	-0.0542502	0.00859473	0.0125493	-0.0103994	0.123298	0.254806	0.123789	0.252344	-0.265622	-0.407471	-1.60171e-16	0.0533333	0.184737	-0.166667	-0.0851858	0.219039	0.0429669	0.0671479	0.159	-0.005
Alk	0.136885	1	0.375548	-2.90507	0.116409	-0.304048	2.84956	0.482483	0.51	-0.115	0.0488017	-0.125821	0.00258154	0.028695	0.118927	-0.228555	-0.251819	-0.076481	-0.261215	-0.0540558	0.164191	-0.0336604	0.017469	-0.176667	-0.08	-0.033173	0.00333333	0.0677503	-0.0277453	-0.0810595	-0.2308	-0.124	0.123
Alkbh1	0.519554	0.870968	0.0399117	-0.438012	0.187208	-0.0188145	0.494447	-0.855011	0.197453	0.93513	-0.0220965	-0.0715612	-0.0806163	-0.11236	-0.241457	-0.18069	-0.0326853	0.0498936	0.237265	0.00633817	0.0162425	0.0969488	-0.694503			0.205643	-0.0666667			0.174842	-0.411034	-0.0764992	-0.188464
Alkbh2	0.780524	0.83871	-0.30834	-0.325235	0.156256	-0.227448	-0.468027	-1.27317	1.23	-1.57	-0.0535173	-0.286956		-0.00882289	0.0564933	-0.217239	0.0186729	0.0318536	-0.0690132	-0.160602	-0.063135	0.0811713	0.0639133			0.298218	-0.0466667			-0.475943	-0.502839	-0.019	0.218
Alkbh3	1.32797	0.870968	-0.405427	-0.310944	-0.324616	-0.408669	2.40603	-0.307487	0.182971	-0.371193	-0.0867899	0.131989	-0.0729302	0.164152	0.13681	-0.00892399	0.377932	0.274191	0.0989411	0.0977444	0.121416	-0.232472	0.129529			-0.312474	-0.22			0.190713	0.286365	0.076	0.427
Alkbh4	0.453891	1	-0.114244	-0.361899	-0.0217157	0.153254	0.841462	0.119398	0.484438	-1.07396	0.174441	0.120234	0.166617	-0.245131	-0.285439	-0.252792	-0.0175426	-0.414237	-0.286849	0.158482	0.146094	0.22174	0.314694	-0.0566667	-0.19	0.33968	0.0633333	0.0892862	0.219773	-0.0218612	-0.387227	0.18	0.007
Alkbh5	2.91853	0.967742	-0.237452	-0.441813	0.0403264	-0.269043	0.39643	-0.518887	-1.67386	-0.885598	-0.481602	-0.283781		0.132296	0.179397	0.256671	-0.00988668	-0.220911	-0.0551149	-0.115226	-0.224307	-0.0813484	0.0941822	-0.536667	0.223333	-0.22987	-0.133333	-0.141674	0.0767616	-0.0330229	0.202686	-0.113333	-0.111667
Alkbh6	1.35048	0.83871	0.161444	-0.250512	-0.409895	-0.315436	-0.11265	-1.29081	1.1	-1.21	-0.0442809	0.204585		-0.0315672	-0.263069	0.108751	0.0393266	-0.00485645	0.16457	0.0737484	0.071238	0.215942	0.113925			-0.00655228	-0.32			0.134832	0.305537	0.07	0.248
Alkbh7	0.720682	0.870968	-1.19837	-0.415162	-0.07181	-0.963111	-0.35106	-0.278428	1.47	-2.1	-0.317207	-0.503279	-0.850841	0.115384	0.0169152	0.0977942	0.30739	-0.157925	-0.538081	-0.601825	-0.382942	-0.170361	0.233047			-0.515984	-0.256667			-0.189816	-0.05547	0.221	0.505
Alkbh8	0.417213	0.870968	-0.768034	-0.436844	0.28104	-0.0955572	0.572536	-0.688561	-0.863565	0.401726	0.0682125	-0.164469	-0.110869	-0.101907	0.461486	-0.0225897	0.211439	0.58587	0.385759	-0.0331	-0.0792919	-0.249864	-0.242297			0.376698	0.106667			-0.154592	-0.340543	-0.264	-0.351
Allc	0.330527	1	0.0127314	-0.390511	2.74566	-0.17303	0.843114	-0.112191	0.819516	0.173796	0.131804	-0.262609	-0.0161275	0.0117227	-0.0725749	-0.254379	-0.109087	0.225181	0.000187681	0.0315886	0.11445	-0.0949586	0.0276231	0.176667	-0.26	-0.0558788	0.16	0.0297285	-0.161912	-0.091617	0.000274541	-0.487	-0.379
Alms1	0.225548	0.83871	-0.777061	-0.860206	-0.212915	0.354252	0.733318	-0.596545	-0.953044	-0.162375	-0.2449	-0.254913		0.169663	0.121396	0.264231	-0.247717	-0.223777	-0.180398	-0.487657	-0.549445	-0.299481	0.0689402			0.0723119	-0.09			-0.240368	-0.111188	-0.257	-0.4065
Alox12	0.214765	1	0.318484	0.654973	0.758587	1.06633	0.623496	0.153251	0.415864	0.291458	0.161547	0.0685699	0.00669292	-0.410715	-1.86664	-0.275809	-0.266262	0.10556	-0.12388	-0.0736496	-0.0303435	0.100848	-0.0611153	-0.05	0.14	-0.012279	0.05	0.0070055	0.113118	0.00588776	0.0037328	0.2425	-0.06
Alox12b	0.51059	1	0.433359	-1.40718	-0.870717	0.106915	0.0995357	-0.0974983	0.72	-0.4	0.00454845	-0.160282	0.0115089	0.286548	-1.84021	0.234561	-1.068	0.222713	0.130233	0.0899473	-0.0244005	-0.165861	0.0170788	0.0266667	-0.07	-0.00405492	0.0933333	0.00665678	0.0598181	0.0925021	0.036865	0.0225	-0.163
Alox12e	1.70983	1	0.106843	1.05237	0.86007	-1.26946	0.368589	-0.0668733	0.46	-0.33	-0.192994	0.00377701	-0.110325	-0.130112	0.717421	-0.21388	0.56856	-0.0592064	-0.0212849	0.158125	0.0748179	0.0077538	0.031219	0.0333333	-0.25	-0.0676853	-0.0633333	0.0243636	-0.207137	0.213226	-0.212516	-0.027	-0.276
Alox15	0.10918	1	0.40571	-0.174029	-0.342888	0.432959	0.452512	-0.0845517	0.1	-0.12	-0.235115	-0.475043	0.144401	0.144371	0.210545	-0.12577	0.138648	0.0532734	-0.0649428	0.163399	-0.0685109	0.0697706	-0.027134	-0.333333	-0.0266667	0.0139825	0.0366667	-0.196025	-0.415723	-0.0526633	-0.190232	-0.569	0.008
Alox5	0.179364	0.870968	0.329086	-0.956279	0.925999	-0.472068	0.116896	1.6457	0.715	-0.23	0.0200906	-0.0828075	0.0469313	-0.663317	1.05743	-0.334708	0.435715	-0.0733934	0.102562	0.0231436	0.0274259	-0.117548	-0.00705658			1.0016	0.14			-0.119308	-0.120804	-0.154	-0.051
Alox5ap	0.433048	1	0.638254	-0.533247	-0.66022	0.186096	0.80023	5.79145	0.735	0.08	0.171652	0.381699	0.34939	-0.135705	0.542061	0.056232	0.376509	0.0873176	-0.00612137	0.665765	0.653609	-0.051974	-0.00561053	-0.243333	-0.153333	0.0984333	-0.446667	1.34808	0.970645	0.389969	-0.15476	0.245	0.161
Alox8	0.233709	1	0.282544	0.142019	-0.596644	-0.973625	3.15265	0.04631	0.18	-0.525	-0.0424507	-0.0877424	-0.084649	-0.0644704	-0.51385	-0.291014	-0.276607	-0.0053527	-0.0112184	0.109089	0.0993495	-0.0204689	-0.0423088	-0.32	0.163333	-0.0627225	0	-0.0178566	-0.0348872	0.0397818	0.0377064	-0.337	-0.535
Aloxe3	0.73277	1	0.027849	-0.658709	-0.216564	-0.165945	0.154171	-0.047355	0.48	-0.085	-0.130231	-0.139621	-0.137574	0.243112	-1.16318	0.173463	-0.786694	0.03662	0.213728	-0.0411534	-0.0707355	0.443255	0.0787053	-0.15	-0.0133333	-0.836197	0.373333	0.117865	-0.00301611	0.0341237	0.201138	-0.045	-1.277
Alpi	0.115526	0.806452		-0.0991332	0.0858846	0.735868	0.995884	0.0875067	0.45	-0.425	0.214704	-0.210229		-0.0113056	-0.232763	-0.136876	-0.217936	0.0379934	0.068521	0.229783	0.123108	0.0284898	-0.01623			0.00888409	-0.0766667			0.0191402	-0.134683	0.197	0.11
Alpk1	0.202906	0.806452		1.54988	1.38333	-2.01294	0.909802	0.385332	0.525	0.27	0.55109	0.946342		0.641842	0.610607	0.198452	0.642511	-0.272267	0.328786	-0.0235723	-0.0870366	0.42469	0.369419			0.214806	0.0733333			0.258774	-0.012166	-0.089	0.483
Alpk2	0.134886	0.935484		-1.07039	-2.04439	3.16046	0.206451	0.326798	-0.025	-0.4	0.0405185	-0.0344981		-0.102436	0.065183	-0.0573018	-0.273623	0.0790291	-0.106903	0.0974293	0.0271459	0.0463918	0.0345511	0.12	-0.15	-0.0177897	0.0866667	-0.0576061	0.0172206	-0.225821	-0.075171	-0.193	-0.031
Alpk3	0.25373	1	0.279116	-0.427565	-0.360063	-0.292181	0.581857	0.5531	0.535	0.61	0.0186894	-0.158954	0.036584	0.134718	-0.215471	-0.0478988	-0.256876	-0.0142955	-0.00132794	-0.0464882	0.0359964	0.000551209	0.00859473	-0.116667	0.193333	0.0784972	0.103333	0.0319906	0.130462	0.196174	0.0401912	-0.0195	0.095
Alpl	0.330087	1	0.158892	0.373593	-0.913761	-0.913773	0.373997	-0.682722	-0.475	-0.53	0.0317438	-0.31107	0.135022	0.0580212	-0.121202	-0.180832	-0.310148	0.250158	-0.122786	-0.0722	-0.200226	-0.0869231	2.32273	-0.456667	-0.116667	0.0882488	-2.15333	-0.0605643	-0.220421	-0.301188	-0.34902	-0.332	1.351
Alppl2	0.13615	1	0.303516	-0.0798165	-0.275856	0.364327	0.00997833	0.0469923	1.02814	-0.345033	0.0397722	-0.323999	0.0631958	-0.177684	-0.261591	-0.27944	-0.206839	-0.0112677	-0.0529614	-0.0664295	0.111972	-0.00544048	0.00887776	0.166667	0.116667	-0.0425254	-0.123333	0.00468546	-0.0324491	-0.0875429	-0.097789	-0.098	-0.149
Als2	0.561246	0.83871	-0.650498	0.981196	-0.681152	-0.474783	0.34451	-0.428818	0.0346136	0.112584	-0.0662783	-0.189008	0.0898285	0.0563682	0.386037	0.0964609	0.303288	-0.0171585	0.185516	-0.0635388	-0.132009	-0.206804	0.384796			-0.243481				0.0629624	0.271264	-0.158	0.013
Als2cl	0.563569	0.967742	-1.15791	-0.325037	0.0415681	-0.796817	0.206758	-1.0862	0.0295498	-0.687928	0.268116	0.0667044		0.0484175	0.0941536	-0.0919625	-0.355493	-0.0430583	-0.178166	-0.0377775	-0.0629472	-0.0128216	0.0319794	-0.0133333	0.253333	-0.500414	-0.0366667	-0.157027	-0.0541697	-0.299443	-0.0532491	-0.448	-0.849
Als2cr11	0.0240436	0.870968	0.103448	-0.584963	1.32193	0.447459	-0.241008	-0.232763	-0.18	0.16	0.0704215	0.00812469	-0.0662658	-0.0445093	-0.103067	-0.04456	-0.0806954	-0.00486071	-0.0885264	0.0434459	0.0693903	-0.0537911	0.0426509			0.0151964	0.09			0.00222755	0.0141209	-1.674	-1.461
Als2cr12	0.0907022	0.870968	-0.0782053	0.903689	1.18364	0.637912	1.26787	1.40626	-0.337537	0.769322	0.0455646	-0.0293807	-0.13238	0.033379	-0.337615	-0.310552	0.272016	-0.101354	-0.239257	-0.00735549	-0.00253087	-0.193037	-0.107223			-0.259402	0.643333			0.49901	-0.731539	0.056	-0.882
Alx1	0.0894929	0.83871	0.171779	0.214878	1.14684	-0.214101	-0.528413	-0.107644	0.24	0.0488005	-0.151316	-0.043008		-0.19047	-0.0382169	-0.0307936	-0.059073	0.00882176	-0.0078517	0.0822196	0.0215782	-0.0768474	0.0728754			-0.386359	0.15			0.0664555	0.049381	0.062	-1.221
Alx3	0.141913	1	0.685939	-0.108686	-0.460094	-1.95888	0.23502	-0.0947122	0.496665	0.104351	0.185701	-0.20075	-0.00725927	0.285806	-0.127431	-0.140393	-0.377523	0.223662	-0.175139	0.017848	0.126622	0.0273116	0.0468104	-0.04	-0.206667	0.0197472	-0.02	-0.0485626	0.0298685	0.0667976	0.0548513	-0.144	-0.58
Alx4	0.129426	1	0.473488	-0.0424353	-0.664016	0.323454	2.39232	-0.464995	0.56	-0.16	0.0586119	-0.0778225	0.0409901	0.0901077	-0.191964	-0.324276	-0.345763	0.0958043	-0.106537	0.266376	0.0868052	0.0132891	-0.104441	0.0133333	-0.35	0.0305545	0.13	-0.0272402	-0.0835677	0.0751722	-0.302112	-0.072	0.088
Alyref	5.57138	1	-0.234028	-0.713599	-0.108064	-0.250082	0.127275	-0.355625	-0.824575	-0.514547	-0.409904	-0.368811	0.276863	-0.0707389	0.359702	0.0282252	-0.0864062	-0.213566	-0.407836	-0.260582	-0.157599	-0.523165	-0.359411	-0.0566667	-0.123333	-0.163202	-0.2	-0.634107	-0.687916	0.0235421	-0.744075	-0.137	-0.474
Alyref2	0.246032	0.580645	-0.59563								-0.235703	-0.220064	-0.0244171	0.0948842	-0.0207267	-0.27294	-0.27518	0.0274754	-0.0297534	-0.0243981	0.185443	-0.0893289	-0.113678			-0.0801259	0.1					-0.085	-0.42
Amacr	0.738524	1	-0.865342	-0.785556	0.112254	-0.539726	0.394677	-1.02162	-1.56	-1.15	-0.487861	-0.359216	-0.17842	0.0837997	0.33901	-0.0136001	0.267687	0.0538336	-0.0316954	-0.87299	-0.738993	0.141513	0.3583	0.153333	0.316667	0.263085	0.0366667	-0.464257	-0.742964	0.254234	0.909433	0.077	0.925
Ambn	0.119518	1	0.172903	-0.271673	-0.413138	-0.417991	0.192645	-0.230112	0.14	-0.035	-0.108026	-0.111031	0.083332	0.213368	0.0436126	-0.0875032	-0.27932	0.000875781	0.107485	-0.0471229	-0.0254901	0.0276499	0.0969563	-0.236667	0.176667	0.0473266	-0.0566667	-0.0182914	0.045691	-0.181717	0.104173	-0.165	0.073
Ambp	0.118854	1	-1.38912	-0.623437	-1.63227	1.5502	-0.959358	0.039795	-0.105	-0.22	-0.387819	-0.13512	-0.000253578	0.110346	-0.0251841	-0.278939	-0.60632	0.0679543	-0.152234	-0.287487	-0.24791	0.0122787	1.24369	0.103333	-0.0633333	0.0607981	0	-0.0632483	-0.272188	-1.02706	-0.0222559	-0.081	-0.399
Ambra1	0.968573	1	-0.498131	0.0643975	-0.33833	-0.0644227	0.225951	-0.119776	0.859127	0.0669857	-0.0544538	0.0839322	-0.0359041	0.189755	-0.0125469	0.00842786	0.0613131	-0.140629	0.0191565	0.00415956	0.00097001	0.0800794	0.042833	0.05	-0.196667	-0.240848	-0.02	0.0396984	0.0394431	-0.232826	0.0975112	0.045	0.17
Amd1	2.45053	0.774194		-0.859401	0.0581853	-0.322908	-0.0821623	-1.1409	-0.997955	1.04878	-0.262835	-0.220824	0.0165374	-0.0929441	-0.0731588	0.105899	0.176669	-0.157192	-0.0871422	-0.50352	-0.421814	-0.41194	-0.575766			-0.406859	-0.266667			-0.158673	-1.16261
Amd2	1.64747	0.129032											0.21027														-0.376667					-0.190333	-0.402667
Amdhd1	0.312378	0.935484		0.896549	-0.518563	0.900464	0.0372329	-0.00529567	0.519984	0.262846	-1.22942	-0.61018		0.158959	-0.1712	-0.242972	-0.163616	0.125919	-0.0685063	-0.503081	-0.476946	-0.0138508	0.640393	0.126667	0.33	-0.0268501	-0.243333	0.0405106	-0.0927741	-0.30739	0.186483	-0.092	0.19
Amdhd2	1.40152	0.870968	-0.536611	-0.38635	-0.890967	-0.689561	-0.473952	3.12015	-0.055	-2.17	0.0763779	0.422113	-0.164798	-0.00513842	0.234743	-0.194254	-0.0424343	0.0891785	0.176803	0.0746314	0.240453	0.177112	0.629738			-1.26765	-0.243333			-0.511482	1.76786	0.152	0.095
Amelx	0.0828082	1	0.135136	-0.998616	0.103414	0.363411	1.05204	0.166745	1.03901	-0.16502	-0.0286907	0.0512365	-0.0168323	0.259144	0.0841199	-0.0962883	-0.276211	-0.0505483	-0.00224964	0.0769906	0.0799951	-0.0828178	0.034188	-0.0666667	0.02	-0.0131755	0.0766667	0.13	-0.156012	-0.0578945	-0.0570538	0.383	0.187
Amer1	0.442673	0.870968	-0.120793	-0.248999	-0.46143	-0.375802	0.316266	-1.12	-0.169575	0.0555559	0.325048	0.0829869	0.0663336	0.16472	0.547148	0.121207	-0.135972	0.0718358	0.0778825	0.106755	-0.113033	0.121518	0.0800895			-0.103366	-0.34			0.233358	0.10703	-0.309	-0.088
Amer2	0.21181	0.870968	0.409329	-0.337035	-0.347923	-0.519374	1.07039	0.328347	0.32	-0.13	0.00310175	-0.149331	0.533301	-0.0162869	0.0786005	-0.23746	-0.236295	0.0965545	-0.00371775	-0.07246	0.126754	-0.0418736	0.0316482			0.0545948	0.0366667			0.148833	0.0192752	-0.086	-0.068
Amer3	0.0917022	0.870968	0.726519	0	0.517399	-1.88554	-0.353232	-0.338108	1.075	0.2	-0.0385758	-0.127506	0.0567205	0.100715	-0.0683537	-0.39509	-0.121876	-0.0789438	0.0620645	-0.113928	0.204214	-0.0579592	0.0283677			0.0663242	-0.01			0.162247	-0.0382311	0.287	0.084
Amfr	2.53402	1	-0.0498899	-0.32591	-0.0800311	-0.111041	0.724058	-0.857353	-0.14	-0.015	0.0388416	0.187081	0.0721545	-0.231487	-0.0692776	0.00802897	0.0488444	0.0957073	0.124086	0.111042	0.00496715	0.0498074	-0.0816895	0.0766667	0.216667	0.169871	-0.0133333	0.246952	0.414613	-0.118154	0.0892558	-0.018	0.187
Amh	0.166302	1	0.110818	0.0374747	-0.347923	-0.0565835	-1.36182	-0.07786	1.03	0.055	-0.0679126	-0.194898	-0.0302664	0.122619	-0.254501	-0.180698	-0.229425	0.175166	-0.0363635	0.167733	0.145225	0.0604233	-0.0327749	-0.323333	0.0133333	-0.0801606	0.21	-0.0518974	-0.15818	0.0678179	-0.069092	0.313	-0.02
Amhr2	0.0954043	1	0.303298	0.131369	0.0251163	0.504127	0.204385	0.105103	0.909935	-0.162547	0.0582837	-0.04672	0.0168612	-0.0338466	-0.106261	-0.291717	-0.186295	0.263248	0.00742451	0.121912	0.283208	-0.0528038	0.0389068	0.323333	0.00666667	-0.0299289	0.0433333	0.0790354	-0.0751682	-0.0242643	-0.150898	-0.623	0.764
Amica1	0.0833157	0.580645	0.2921								0.064183	-0.0220088	0.128312	0.0140445	-0.0298429	0.0753711	-0.119751	0.14395	0.137734	0.0281855	0.146099	-0.0891969	0.0376709			-0.00126314	0.05					-0.228	-0.184
Amigo1	0.38277	1	-0.270441	-0.578092	-0.765304	-0.538983	1.20561	-0.074935	0.266101	-0.309347	0.0393588	-0.0182732	0.496579	-0.140103	0.0743852	-0.149128	-0.244952	0.237799	-0.0770134	1.10977	0.882187	0.191163	0.361846	0	-0.00666667	-0.344372	-0.173333	0.09044	-0.0997918	-0.0722065	-0.0613212	0.058	-0.179
Amigo2	0.133307	0.806452	0.163254	-0.113881	0.160373	-0.508844	-0.99163	1.06867	0.39228	0.122777	0.111067	-0.223511		-0.0744394	-0.212185	-0.315452	0.0049828	0.261022	-0.0250807	-0.063751	0.0502729	0.0167945	-0.0706734			-2.30839				-0.0518622	0.0884069	0.47	2.511
Amigo3	0.222611	0.580645	0.281789								0.0774065	-0.0545365	0.139656	-0.380306	-0.345843	0.0799023	-0.0164158	0.177784	0.266111	0.135074	0.273452	0.346034	0.0531449			0.200515	0.173333					0.256	-0.002
Ammecr1	1.21895	0.967742	0.963354	-0.25392	0.639394	0.184931	1.44078	-0.747483	-2.20119	0.44329	0.387222	0.683843		0.252728	0.973963	0.0550816	0.469568	0.148038	0.309981	0.569784	0.487791	-0.426271	-0.0956699	0.47	-0.13	0.674399	0.943333	0.120244	0.0373823	1.33484	0.10002	-0.391	-1.769
Ammecr1l	1.20735	1	0.0622827	-0.640073	-0.515387	-0.420982	0.758055	-1.31404	-0.99524	-0.182733	0.523127	0.221303	0.360657	-0.0185959	0.0443739	0.0978859	0.0265909	-0.182352	0.0206929	0.285244	0.0213598	0.200366	-0.205522	0.0166667	-0.0566667	0.179166	0.233333	0.349638	0.22698	0.301002	0.140961	-0.158	-0.063
Amn	0.242175	1	0.471416	-0.403152	1.0456	3.99548	0.384011	0.07978	0.73	1.18	-0.103742	-0.300281	0.072724	-0.0724365	-0.129741	-0.101396	-0.429126	0.148474	-0.0150376	-0.0217663	0.0593509	-0.116168	-0.0598247	-0.206667	-0.323333	0.0655743	-0.0266667	0.00503989	0.0543518	0.206666	-0.0238538	0.038	-0.129
Amn1	0.512978	0.806452		0.360704	0.180154	-0.204523	0.309142	-0.227194	-0.626767	0.435421	0.440982	0.707171		0.142409	0.0573378	-0.159445	0.261772	0.422575	0.912379	-0.056605	-0.189134	0.223557	-0.277998			0.392703	0.683333			-0.0608597	0.485521	-0.045	-0.022
Amot	0.501183	1	-0.76938	-0.377109	-0.356323	-0.636905	0.184198	-0.182928	0.578474	0.179623	0.0437704	0.145884	0.00834833	0.23454	0.21715	0.24464	0.129866	-0.00968604	0.251917	0.142977	-0.115721	-0.233002	1.12452	0.106667	-0.00666667	0.122698	0.363333	0.121885	0.232748	0.119853	0.581826	-0.516	0.875
Amotl1	1.24412	0.806452		-0.00243172	0.386955	-0.127886	1.57302	-1.03976	-0.709373	-0.595805	1.29633	1.25051		0.161665	0.288272	0.0260566	0.0306759	-0.00507265	-0.075852	0.859527	0.913559	0.187873	-0.135626			0.177749	0.0666667			0.40814	-0.560465	-0.004	0.085
Amotl2	2.51341	1	0.495226	-0.250547	-0.949456	-0.68156	0.0480382	-1.63347	-0.2	-0.09	0.53009	-0.523795	-0.326711	-0.0479618	0.150221	-0.201411	-0.580968	0.274062	-0.331948	-0.185386	-0.153084	0.170846	0.0956863	0.0133333	0.0966667	0.711287	0.596667	-0.159721	0.262544	0.879788	0.637885	-0.077	0.168
Ampd1	0.0809832	0.83871		1.63941	0.552541	0.125531	0.222392	1.367	0.38	0.015	-0.0387032	-0.127479	-0.144447	0.00585676	0.0337843	-0.134737	-0.168169	0.1391	0.00698897	0.061792	-0.00685349	-0.0739886	-0.0757623			-0.0602409	0.0733333			0.00343347	-0.192045	0.041	0.291
Ampd2	1.19975	1	-0.205383	-0.111147	-0.0224189	-0.10765	0.372953	0.12681	1.14498	-0.280468	0.0564579	0.0725515	0.244953	0.179913	0.251567	0.0748515	0.286438	-0.127874	-0.0727645	-0.0532017	-0.0882545	0.0593517	-0.29873	-0.223333	-0.176667	0.284723	0.176667	0.105847	0.182081	-0.214195	-0.589397	-0.01	0.087
Ampd3	1.00667	1	-1.04083	-0.539275	0.926308	-0.377582	-0.621266	-0.257482	-0.46	-0.015	0.38316	0.990046	-0.0858747	-0.0757418	0.259624	-0.0740988	0.295917	0.57809	1.24265	0.30089	0.191039	0.30043	-0.273182	-0.126667	0.29	-2.00574	-0.723333	0.775119	0.517662	1.92555	1.8105	-0.178	-0.008
Amph	0.149036	1	0.424067	0.485427	-0.584963	-1.28011	-0.152003	0.219933	0.305	-0.085	0.0120778	0.0132949	0.034966	0.16338	-0.0329689	-0.0921036	-0.115063	0.0155752	0.00141085	0.0973357	0.0313329	-0.0477583	0.0433377	-0.26	-0.343333	0.0978213	-0.12	-0.0371785	0.034293	0.0373819	-0.0642445	0.014	0.183
Amt	0.144364	0.548387									-0.325502	-0.41011	0.0120888	-0.201995	-0.262618	0.0194062	-0.309626	0.0473598	-0.104271	-0.136664	-0.322303	0.220616	0.182828			-0.13353	-0.12					-0.779	0.497
Amtn	0.0700511	0.806452		-2.32423	0.21042	0.545326	0.524662	0.176047	0.475	-0.09	0.126981	0.0902288		-0.00973824	-0.278436	-0.119229	-0.170599	0.0694849	0.13286	-0.0896232	-0.16058	-0.168217	-0.011786			1.40718	2.98333			-0.0795474	-0.00832653	0.179	-0.008
Amy1	0.0548973	1	0.269965	-2.15056	-0.802554	-0.347923	0.0374747	0.502695	-0.115	-0.1	-0.00383252	-0.0387549	-0.0277512	0.0299345	-0.160817	0.00906647	-0.0303692	0.138844	-0.0485301	-0.0158804	-0.0496959	0.513486	-0.0233092	0.3	0.633333	0.0327871	-0.0766667	0.0596329	0.0760142	-0.0299203	-0.273463	-0.214	0.783
Amy2a2	0.0289387	0.0322581																									-0.0166667
Amy2a4		0.0645161																														0.172	0.851
Amy2a5	0.0837112	0.516129									0.605091	0.106419	0.0510347	-0.167032	-0.228906	-0.164672	0.456003	0.232593	-0.0807652	0.18792	-0.0605223	0.0640947	-0.0842689			-0.0553885						-0.377	-0.2045
Amz1	0.261971	0.870968	0.514163	-1.1006	1.79442	-0.0202588	-0.31895	-0.801017	0.335	-1.515	-0.0116107	-0.292302	0.164126	-0.0356785	0.0325721	-0.174165	-0.120394	0.0608013	0.0532761	0.110477	0.118192	-0.0965755	-0.00421352			0.171457	0.0933333			0.296708	0.0390189	-0.009	-0.178
Amz2	0.997562	0.967742	-0.523728	-0.0642776	-0.328663	-0.314409	0.212946	-0.896735	0.586082	1.21018	0.188017	0.400684		0.0232777	0.267827	0.0329432	0.258864	0.0938491	0.132722	0.140313	0.160666	-0.133906	-0.058241	-0.143333	0.03	-0.166906	-0.0833333	0.0978529	0.250104	-0.16614	0.101842	0.00833333	0.044
Anapc1	1.98958	1	-0.276346	-0.455048	-0.0622672	0.118555	0.206873	-0.826725	-0.53249	0.164699	-0.0533486	-0.148057	-0.204516	0.0524075	0.287107	-0.0339468	0.0176459	0.0648628	-0.0417001	-0.0653536	-0.0284523	-0.204159	-0.00797411	-0.0466667	-0.0766667	-0.0797798	0.0233333	-0.102921	-0.0832978	-0.236307	0.0870714	0.0333333	0.0686667
Anapc10	0.512875	0.870968	-0.930418	-0.276444	-0.148137	-0.356433	0.470032	-0.427227	-0.96755	-0.339452	0.363627	-0.124569	0.0293963	-0.174576	-0.0513852	-0.0881049	0.116643	0.179264	0.064681	-0.0767511	0.120212	-0.0641869	0.0252646			0.285601	0.196667			0.291973	-0.0143249	-0.146	-1.191
Anapc11	1.11763	1	-0.761072	-0.400611	-0.640638	0.191249	0.182146	-0.134647	0.177272	0.0214861	-0.21833	-0.00341009	0.0539671	0.125458	0.0189792	-0.175047	0.133205	-0.282997	-0.480047	-0.136419	0.014806	-0.321039	0.340245	0.146667	0.116667	0.0742135	-0.0566667	-0.590763	-0.738851	-0.079514	-0.345581	0.0865	0.137
Anapc13	2.87532	1	-0.799696	-0.193863	-0.576079	-0.514326	0.018806	-0.58327	-0.54	1.47	-0.406215	-0.0722193	-0.436678	-0.16446	-0.165609	0.137933	0.144785	-0.145348	-0.208362	-0.152962	-0.19826	0.281441	0.530198	-0.0966667	-0.15	-0.328886	-0.143333	-0.577814	-0.424313	-0.00379801	0.362318	0.057	0.291
Anapc15	0.946201	1	-0.530237	-0.265997	0.110848	-0.587796	0.521502	-0.324506	0.545711	0.77725	-0.426781	-0.579769	0.0626162	-0.144456	0.195839	0.00372896	0.194048	-0.299278	-0.448165	-0.209839	-0.117589	-0.841588	-0.153258	-0.0866667	-0.00666667	-0.255068	-0.41	-0.652726	-0.601547	-0.186588	-0.710951	-0.167333	-0.395
Anapc16	1.74299	1	-0.210068	-0.227411	-0.048014	0.0221579	0.354346	0.0308929	0.857807	1.5579	-0.198953	-0.0756711	-0.0832008	0.0205531	0.0716616	-0.104993	0.202522	-1.37346	-1.03881	0.111359	0.0204095	0.38315	-0.409368	-0.32	-0.496667	-0.169496	-0.15	-0.278305	-0.137022	0.175751	0.0469608	-0.119	0.093
Anapc2	2.17159	1	-0.0881845	-0.0671778	-0.125269	-0.138861	-0.0466554	0.490852	-0.735	-1.825	0.0364353	0.153442	-0.090921	0.0276841	-0.0584217	-0.201648	0.17263	0.0604734	0.0560704	0.310199	0.308129	0.0922227	0.527355	0.433333	0.263333	-0.349794	-0.04	0.226361	0.58427	0.0357165	0.570729	0.131	0.218
Anapc4	1.6348	1	-0.332256	-0.105345	-0.0829032	-0.242735	0.44509	-0.298296	-2.2488	1.24358	0.0868299	-0.0210742	0.344898	0.110249	0.261917	0.219007	0.239958	-1.21117	-1.17584	0.0701042	0.119549	-0.112241	-0.00613571	-0.0133333	0.0666667	0.0522425	-0.09	0.0198502	0.472058	-0.249174	-0.421809	-0.032	0.284
Anapc5	4.34531	1	-0.221913	-0.217174	-0.160251	-0.296916	0.101343	-0.487577	0.29587	1.16404	-0.171262	-0.0731585	0.0417648	0.0870038	0.212052	0.110788	0.229479	-0.0418198	-0.252375	-0.1536	-0.109656	-0.310039	-0.0315353	-0.0833333	-0.113333	-0.0462524	-0.14	-0.524719	-0.115591	-0.139862	0.0500107	-0.0666667	0.37
Anapc7	1.12004	1	-0.380203	-0.637316	-0.237951	-0.582642	1.78495	-0.198269	0.431464	-0.501506	-0.215123	-0.212631	0.133568	-0.0364789	0.339918	-0.0366947	0.386082	-0.261009	-0.230676	-0.00466187	0.0791762	-0.230017	0.169245	0.23	0.0566667	0.066992	0.07	0.0530802	-0.120985	-0.0148004	-0.00974087	-0.194	-0.174333
Ang	0.257035	0.516129	-0.67777	0.199622	-0.872034	-0.460671	0.270497	2.80493	0.469933	-0.0382914														0.246667	0.0433333			0.157715	0.122964	0.0793843	0.361247	0.132	-0.152
Ang2	0.135017	1	0.386821	0.211504	0	0.612977	1.18057	0.799708	0.25	0.04	-0.032794	0.0604911	0.0495046	0.361655	0.723027	0.040763	2.81039	0.0441952	0.16249	0.086518	0.00566553	0.0572976	-0.0038229	-0.0166667	0.0166667	-1.36062	-0.326667	0.1588	0.102464	0.88241	0.52312	-0.341	-0.358
Ang3	0.0368943	0.387097	-0.411913	0.696931	-0.326104	1.82889	1.48938	-1.84022	0.135	0.035																				-0.037262	-0.00779057	-0.018	-0.3395
Ang4	0.10072	0.83871		-1.00385	-0.311718	0.989621	-1.38908	-0.323304	0.00487124	-0.0163179	-0.157788	0.143895	0.103848	0.341039	-0.158845	-0.156127	-0.196958	-0.274411	0.0869431	0.052229	0.028041	-0.0741433	0.0627218			0.00720942	0.283333			0.0422973	-0.116949	-0.043	-0.101
Ang5	0.0667523	0.451613									-0.0622768	-0.000570208		-0.0847446	-0.27954	0.222627	0.190245	0.0787284	0.0340131	0.0420996	-0.0902188	-0.195481	0.0753644			-0.0559805	-0.07
Ang6	0.105424	0.451613									0.089608	-0.121232		-0.0646299	-0.0389879	-0.0705075	-0.253253	0.00877757	0.0178026	-0.0720199	-0.00620181	0.0229157	0.00490239			-0.0482874	0.00666667
Angel1	0.503078	1	0.278906	-0.0120271	0.186717	-0.122555	0.679549	-0.420288	-0.425	-1.055	0.106759	0.242814	0.121575	-0.208082	-0.2051	-0.215136	-0.167301	-0.123557	-0.0107305	0.39165	0.209961	-0.0120532	0.0997569	-0.01	-0.193333	0.180661	0.153333	0.04639	0.0813793	-0.156796	-0.191826	-0.14	-0.569
Angel2	1.08044	1	-0.241379	-0.238445	-0.270961	0.0937746	0.363844	-0.773816	-0.831238	0.937515	0.106476	0.314432	0.138288	0.0922238	0.123281	0.0263241	0.0300418	-0.0306882	0.201072	0.17127	0.025773	0.0391603	0.0871469	-0.0133333	0.0266667	0.120229	0.00666667	7.13001e-07	0.337532	-0.0606427	0.114302	-0.186	-0.294
Angpt1	0.100774	0.967742	-1.59407	-0.0703893	-0.749979	-1.14179	0.770857	0.732322	0.324579	-0.196602	0.0149283	-0.174836		0.224934	0.144408	0.143703	0.0669817	0.122965	-0.0976526	-1.77887	-2.05074	0.012597	-0.107056	0.14	0.116667	0.0861853	-2.81333	0.0497146	-0.0419841	-0.210543	0.494545	-1.587	2.929
Angpt2	0.23473	0.967742	-1.86842	-0.0612304	0.554636	1.25612	1.51361	0.690811	0.200408	0.263198	-0.781696	-0.406509		0.101269	0.061827	0.153134	-0.148662	-0.753235	-0.158485	-1.03093	-0.860408	-0.233531	0.600831	-0.0866667	-0.2	0.124798	0.286667	-0.0513633	-0.0931607	-0.0741239	0.0418678	0.597	1.788
Angpt4	0.170505	0.967742	0.12689	0.107588	-2.10343	-0.160475	1.08088	0.605759	0.150305	0.0351906	0.30557	-0.300004		0.128176	-0.0830374	0.00296412	-0.221943	0.30263	0.0608727	0.0542512	-0.0183364	0.00128033	0.0333374	-0.293333	-0.563333	1.05819	0.836667	0.307638	0.125156	1.1168	-0.119895	-0.364	-1.253
Angptl1	0.0901414	1	0.17572	1.86541	0.592889	-0.753849	0.583094	1.68936	0.401639	-0.237728	-0.0952636	-0.0269611	0.0426233	0.0329798	-0.371557	-0.118872	-0.30397	-0.0539698	0.0362364	-0.300302	-0.188247	0.00987273	-0.0963902	-0.103333	-0.356667	-0.0436407	0.11	0.0415884	0.0325379	0.0605217	0.0210529	-0.8185	-0.734
Angptl2	1.51295	1	2.44221	0.27082	0.738753	1.38067	1.45995	3.94994	0.283466	-0.385036	2.14394	0.0868046	1.39292	0.493736	-0.306178	0.450617	0.312958	0.401863	-0.920382	2.47821	2.47832	-0.780026	0.0196748	0.13	0.183333	0.0593638	0.163333	1.56185	0.666065	2.44436	1.59701	0.213	0.717
Angptl3	0.105273	1	-0.0780873	-1.61298	-0.965235	0.0931094	0.847997	0.169078	0	-0.185	0.040824	-0.00506089	0.233867	-0.0827793	-0.19123	0.0150748	-0.126692	0.0733332	-0.0221979	0.0692425	-0.00685864	0.00318503	0.152938	0.03	-0.0966667	-0.0503395	0.0966667	0.176297	0.0374442	0.132626	0.0122392	-0.509	-0.512
Angptl4	0.579367	1	-0.182457	2.57105	-1.39437	-0.327049	0.0700563	3.43796	-0.0261907	-0.322548	0.821742	1.04487	-1.10766	-0.176503	-0.193235	-0.391237	-1.31181	0.115274	-0.376513	0.321687	0.242276	0.646417	-0.462217	-0.156667	-0.02	0.249955	-0.286667	-0.141987	-0.412515	0.191448	0.164504	0.048	-0.166
Angptl6	0.436697	0.935484	0.0384606	-0.464081	-0.25968	-0.394508	0.753999	-1.89642	2.185	-1.03	0.192095	-0.107751		-0.197723	-0.0321824	-0.0977462	-0.145283	0.0498186	-0.0738722	0.118472	-0.0611572	0.0843964	-0.690523	0.213333	0.5	0.0289028		-0.12695	-0.160819	-0.131098	0.053211	-0.012	-0.078
Angptl7	0.57781	1	0.144093	-1.43652	0.759866	-0.44387	-1.3971	0.814218	0.5	-0.05	0.0556028	-0.0435967	0.00204374	0.0343982	0.210352	0.39797	-0.486963	0.260586	-0.0140017	0.199567	-0.00318991	4.42268	0.00571322	0.233333	-0.0766667	-0.0203332	0.323333	0.117608	-0.04166	-0.0456085	0.000639916	0.444	0.168
Ank	4.67295	1	-0.509634	-0.0666434	0.819794	0.825777	0.0521914	2.76989	-0.04	1.295	-0.642863	-0.421364	-1.52851	0.0608261	0.281866	-0.0716935	-0.0635467	0.538912	0.310062	-0.115044	-0.013991	-0.151259	-0.680014	0.126667	0.02	0.264989	1.11333	-0.866679	-0.00991454	-1.1531	1.11261	0.431	1.12
Ank1	0.221168	1	0.434156	-0.510857	-0.406803	-0.845073	0.996297	0.101687	0.629361	-0.119977	0.0524442	-0.18966	0.00417997	0.246565	0.27583	-0.0968474	-0.282822	0.023708	0.135949	0.102146	0.177574	-0.106631	-0.0515682	0	0.0633333	-0.0364311	-0.176667	0.0545633	-0.0753669	0.0207214	-0.116598	0.144	-0.177
Ank2	0.111201	0.870968	-0.102981	-0.606007	-0.567182	-0.12989	-0.121481	0.600159	0.421658	-0.0833488	0.116136	-0.00629135	-0.0443682	-0.066165	-0.202427	-0.0910889	-0.261817	0.0977099	0.0162647	-0.0517049	-0.0387053	-0.0671469	-0.297777			0.421353	0.12			0.603457	1.56835	0.0547164	-0.116002
Ank3	0.507541	1	-0.71423	0.109316	-0.477916	0.569075	-0.235099	-0.511412	-0.032003	-0.0632872	0.138812	-0.218302	-0.0717514	-0.24085	-0.0843965	-0.425127	-0.0299864	0.345839	-0.00693939	-0.542446	-0.566911	0.553532	0.0302413	-0.0633333	0.0733333	-1.23194	-1.34333	-0.161799	-0.0794258	0.479096	0.978303	-0.083	-0.560333
Ankar	0.0458968	0.580645	-0.0130042								-0.0788038	0.0550535	-0.0178352	-0.00253563	-0.0774103	-0.0638719	0.00460932	-0.128452	0.208419	0.183957	0.0411266	-0.0751493	-0.0714112			0.0345925	-0.0166667					-1.771	0.113
Ankdd1a	0.262317	0.451613									0.0344274	-0.128882		0.0442291	-0.145914	-0.173822	-0.327847	0.104044	0.069855	0.0464963	0.16952		-0.0383212			-0.0766634						-0.158	0.064
Ankdd1b	0.103507	0.806452		-1.20895	-1.09984	-0.192999	0.17143	-0.938358	0.255	-0.145	-0.00490394	-0.252742		0.315232	0.115954	-0.224841	-0.11487	0.159119	0.0180974	-0.0571376	0.00174128	0.0503261	-0.0748388			-0.0249892	0.14			0.33005	0.182471	-0.251	-1.054
Ankef1	0.0880074	1	0.306976	-1.09034	-0.0445902	-0.44637	0.791413	0.0358458	0.577519	0.113752	-0.0236903	-0.0748624	-0.105832	0.0588689	-0.0242291	-0.139946	-0.069591	-0.034191	-0.0363341	-0.14536	-0.0324681	-0.00484992	-0.0154109	0.06	-0.486667	0.0155371	0.0166667	-0.0279585	-0.171711	-0.0116441	-0.0483854	-0.087	0.0455
Ankfn1	0.0579551	0.548387									0.0004609	-0.108528	0.0912786	-0.0624499	-0.405568	-0.338744	-0.165707	0.206645	0.182452	-0.0211984	0.146603	0.00476189	0.115208			-0.0168096	0.00333333					0.008	0.148
Ankfy1	1.41777	1	-0.268305	-0.0558948	0.0134183	2.63274	-0.450063	-0.120807	0.0502385	0.0713246	-0.0749047	0.0382284	-0.171286	0.184741	0.298001	0.00674419	0.108864	0.307392	0.312323	0.0561018	-0.00529531	0.159811	0.0469442	-0.0666667	0.12	-0.105087	-0.233333	-0.0448387	0.0387104	0.02666	0.272977	-0.436	-0.3445
Ankhd1	1.4192	0.967742	-0.336706	-0.560919	-0.180821	-0.41251	0.318421	-1.27287	-1.03509	0.536001	-0.16431	0.00250779		0.0704004	0.159602	-0.0780385	-0.00238554	-0.279843	-0.0819363	-0.0901492	-0.186699	0.163217	-0.131048	-0.136667	-0.153333	-0.282738	-0.0266667	-0.236097	-0.293293	-0.147359	0.493144	-0.1915	0.165
Ankib1	1.90705	1	-0.181229	-0.428949	-0.0171247	-0.741102	0.163561	-0.44601	-0.189281	0.0287169	-0.0633769	0.0941942	-0.0533897	0.0817295	0.21248	0.000625203	0.163058	0.678381	0.675827	0.0235135	-0.0913112	-0.0860364	0.0469699	-0.02	0.0966667	0.117622	0.336667	-0.149453	0.31637	-0.111387	0.0246971	-0.12	0.248
Ankk1	0.0930286	0.580645	0.420978								0.0668014	-0.0287529	0.078893	0.111752	0.0850027	0.0620666	-0.21544	0.146651	-0.127887	0.0186572	0.133497	-0.0417205	-0.0731989			0.023987	0.0266667					-0.252	-0.262
Ankle1	0.245557	0.83871	-0.549352	-0.322933	-0.474815	-0.307034	0.173332	-1.2555	-0.275	-0.96	-1.06883	-0.808972		0.11542	-0.0925426	-0.129362	-0.146598	-0.774006	-0.464998	-0.448145	-0.43071	-0.280353	0.0526644			-0.0235142	-0.743333			-0.426658	-1.28869	-0.146	-0.225
Ankle2	0.896556	0.870968	-0.278811	-0.283762	-0.163316	-0.383099	0.356507	-0.429127	-0.909859	0.10424	-0.0946394	0.0515781	-0.144944	-0.0208636	-0.187286	-0.0575126	-0.0380267	-0.0460124	0.110329	0.0391646	0.132009	-0.0426223	-0.0391713			-0.0685538	0.0433333			-0.253759	0.12509	-0.11	0.017
Ankmy1	0.125209	0.580645	0.373398								-0.143706	-0.279555	-0.0585989	0.261262	-0.0717907	0.0832564	-0.16721	-0.0328866	0.025286	-0.00215368	0.184541	-0.0568039	-0.00115535			-0.0176925	0.0566667					-0.121	-0.182
Ankmy2	0.537022	1	-0.568835	-0.61053	-0.253447	-0.636976	0.773109	-1.27956	0.10729	0.524244	-0.0987997	-0.206544	-0.213856	-0.138913	0.09176	-0.0392199	0.116027	0.218035	0.148137	-0.0143706	-0.241088	-0.0149441	-0.124416	-0.0866667	-0.103333	-0.460557	-0.256667	-0.195368	-0.391989	-0.110425	0.0784441	0.001	0.34
Ankra2	0.469373	1	-0.493824	-0.310775	-0.335684	-0.238689	0.452303	0.422881	-0.554714	0.757388	0.267584	0.323476	0.185428	0.0571922	-0.102497	0.160701	0.205298	-0.24464	0.0763769	0.00694712	0.096424	0.123234	0.316975	-0.0266667	0.133333	0.0283873	-0.08	0.154395	-0.113574	-0.215726	-0.0461606	-0.01	0.05
Ankrd1	6.99063	1	1.25025	0.344029	1.35933	0.220381	0.248064	2.41709	-1.06219	1.08552	1.50079	0.457094	2.25187	0.216582	0.00881729	-0.00573713	-0.565366	0.0663304	0.178122	-0.132111	0.11001	0.0412262	-0.133209	0.12	-0.0366667	0.216015	1.32333	0.204189	0.123888	0.965	-0.0609933	-0.297	0.857
Ankrd10	0.761081	1	-0.202036	-0.360408	0.221285	0.466211	0.96388	-0.398846	-0.0677657	-0.0816491	0.207723	0.185903	0.0585685	0.131217	-0.0849501	0.110665	0.0784677	-0.731409	-0.237061	0.328059	0.50793	-0.0814506	0.10359	0.16	0.136667	0.36072	0.323333	0.386936	-0.0843703	0.0702694	-0.245953	-0.014	0.086
Ankrd11	0.848269	0.83871	0	-0.405491	-0.262879	0.222102	0.375709	-0.583014	-0.511246	0.14782	0.00804057	0.241434		0.0876922	-0.0990476	-0.256896	-0.263822	0.102943	0.0886465	0.1119	-0.00553938	-0.0723974	-0.339716			0.385278	0.13			0.0839145	0.217971	0.026	0.464
Ankrd12	0.455868	0.83871		-0.391419	-0.556576	-0.559267	0.132134	-0.346543	-0.34351	0.0716474	-0.242522	0.308428	-0.502674	0.0814871	0.133006	0.0696566	0.203356	-0.132831	0.317054	-0.0812225	-0.398396	0.729319	0.254557			-0.331698	-0.04			0.350864	1.49353	-0.265	0.186
Ankrd13a	2.12388	1	-0.401978	-0.157411	-0.499672	-0.650854	0.309029	0.473985	-0.14	1.97	-0.228634	-0.0415443	-0.205394	-0.0199529	0.0927533	0.134247	0.0559122	0.235435	0.0081152	0.104276	0.0495052	-0.260596	0.291112	-0.12	-0.19	0.071203	-0.186667	0.0168248	0.693629	-0.15465	-0.352318	-0.074	0.157
Ankrd13b	1.11176	0.870968	0.429714	-0.228221	0.236636	0.757134	0.626923	0.00953833	0.51	0.115	0.627512	0.462546	0.300384	0.146331	0.196431	0.00624507	0.00538157	0.162738	0.057145	0.453983	0.387023	0.0210979	0.0246887			0.173245	0.11			0.174688	0.555126	0.0215	0.2035
Ankrd13c	2.25745	0.870968	-0.273748	-0.127773	0.0845404	-0.282056	0.375858	-0.488963	0.0244791	0.233132	-0.0391554	0.211247	-0.102116	-0.118629	0.125751	0.113582	0.00985153	-0.0486013	-0.178273	-0.0666583	-0.079329	-0.0559239	0.0419247			-0.087586	0.0133333			-0.194382	-0.41333	-0.041	-0.115
Ankrd13d	0.219801	0.870968	0.172666	-0.224821	0.12138	-0.535434	0.2079	0.0721374	0.65959	-0.841964	-0.239033	-0.126291	-0.269258	-0.132143	-0.150942	-0.288419	0.192973	0.0920029	0.152656	-0.177306	0.0668929	0.163073	0.244924			0.111055	-0.256667			-0.05126	-0.189876	0.073	0.377
Ankrd16	0.563482	0.870968	-0.248659	-0.429296	-0.784173	-0.0164152	-0.550937	-0.628987	-0.2	0.54	-0.0697385	0.207178	0.0378496	0.0405891	-0.327127	-0.281247	0.0165707	-0.129258	0.202472	0.062972	-0.00268916	0.137428	0.239671			-0.250946	0.146667			0.00178766	-0.00878382	0.3485	0.4175
Ankrd17	2.16537	1	-0.0441034	-0.361473	-0.230792	-0.251413	0.66846	-0.399974	-0.266903	0.189333	0.205851	0.110361	0.117014	0.223049	0.336435	0.0714538	0.147181	-0.0805852	0.0435858	-0.00856347	-0.14453	0.176702	0.158877	0.0366667	-0.0266667	0.0883047	0.05	0.224296	-0.012727	0.00674959	0.183754	-0.06	0.254
Ankrd2	0.484134	1	0.477484	-2.01954	1.36075	-0.549557	1.32193	0.797643	1.16	-0.06	0.199717	0.0695465	-0.0671316	0.0679194	-0.273052	-0.220932	-0.266478	-0.0663643	0.0452174	0.16121	0.0643086	0.00217179	-0.0137115	0.26	0.06	0.243024	0.0233333	-0.137172	-0.14682	-0.0838568	-0.00590992	-0.473	-0.234
Ankrd22	0.404923	1	0.164502	-0.890383	0.254421	1.35364	0.795035	-0.753392	0.521464	0.337439	-0.160869	-0.200316	0.169014	-0.127406	0.104976	-0.124995	0.232497	-0.118635	0.0271889	-0.0129898	0.0227575	0.0397713	-0.0568938	0.346667	0.04	-2.58749	-2.02333	-0.00861158	-0.0305945	-0.0385828	-0.147776	2.314	-0.964
Ankrd23	0.266158	0.83871	-0.061035	-1.44599	-0.214505	-0.394631	-1.11548	1.76776	0.75	0.44	-0.0253921	0.241421	0.0745165	-0.354108	-1.19864	0.0171754	-0.836283	-0.239255	-0.0276229	-0.0358812	-0.194593	0.29174	0.293601			-0.271721				-0.0967309	-0.125171	0.0115	-0.0705
Ankrd24	0.299001	1	0.137212	-0.459006	-0.290896	-0.166206	0.777842	-0.329614	0.237028	-0.325306	0.0707743	-0.196819	0.0117254	0.0257177	-0.212833	-0.0918443	-0.168457	0.272115	0.189269	0.0277763	0.0281653	0.0787431	0.0112886	-0.0866667	0.146667	0.0348032	0.146667	-0.273306	-0.378573	0.141746	0.1274	-0.34	0.063
Ankrd26	0.522234	0.935484		-0.174849	0.234099	-0.421178	0.550407	-0.32647	-0.44337	0.159232	-0.150698	-0.388391		0.148232	0.348272	0.0678416	0.0770929	0.243801	-0.0134157	-0.496966	-0.464176	-0.243558	-0.0375153	-0.223333	-0.26	0.0505141	0.203333	-0.400756	-0.241653	-0.540375	-0.865382	-0.264	-0.294
Ankrd27	0.915138	1	-0.496284	0.205822	1.3266	-0.745688	-0.0179799	0.109086	-0.139968	0.67224	0.0717476	0.172014	0.0996836	-0.0169449	-0.108566	0.00166617	-0.0479969	-0.197208	-0.330308	-0.177605	-0.0897552	-0.258073	-0.0424149	-0.223333	-0.2	0.211616	0.0166667	0.0574086	0.20771	-0.143874	-0.510565	0.0025	-0.066
Ankrd28	1.49674	0.806452		-0.31175	0.0425143	-0.45815	0.432737	-0.172441	-1.78753	0.214225	0.0234661	-0.102865		-0.168433	0.326824	-0.205095	0.157932	-0.0939024	-0.0516238	-0.244421	-0.250735	0.0555332	-0.192145			0.122623	-0.0466667			-0.372226	-0.477385	0.103	0.348
Ankrd29	0.228725	0.741935		0.245756	0.270547	-1.06412	3.45536	-0.454139	0.164516	0.217337	0.157048	-0.0354378		0.296786	0.080646	0.269043	0.127078	-0.0847392	-0.0712412	0.140701	0.0757329		0.131318			-0.0180927				0.263814	0.318464	0.1085	0.1595
Ankrd33	0.166149	1	0.426751	-0.920928	-0.332575	-0.837525	-0.188857	0.414335	0.31	-0.17	0.0665688	-0.292687	-0.0334636	-0.0406015	-0.34121	-0.139762	-0.285912	0.0896811	-0.0487466	0.0632684	0.0446649	-0.0830912	0.00266501	0.323333	0.193333	-0.0366788	0.303333	-0.0411191	-0.0968794	-0.0916996	0.232242	-0.2055	0.0185
Ankrd33b	0.256244	1	0.617587	0.248767	-1.24116	0.607154	0.800746	1.84948	0.417509	-0.0506959	0.0867033	-0.0839159	-0.00656143	0.241895	-0.0485761	-0.227905	-0.339273	0.227549	-0.0171675	0.00796261	0.12445	0.0274018	-0.0284279	-0.226667	0.12	0.0591767	0.616667	0.138033	-0.123341	-0.0389812	-0.0524737	-0.14125	0.59775
Ankrd34a	0.141306	0.870968	0.218302	-0.841038	-0.00248526	-0.700532	0.403082	-0.130323	0.895	-0.315	-0.0759199	0.0263979	-0.051428	0.120037	-0.116655	-0.211136	-0.0436818	-0.0395663	0.081837	0.0713505	-0.110363	0.202435	0.0189022			-0.00284683	0.0333333			-0.0838988	-0.179926	0.048	0.32
Ankrd34b	0.143538	0.870968	0.603618	1.83399	-1.89308	1.1375	-3.29278	-0.115267	0.205	0.305	0.0739904	-0.131893	0.0952575	0.216562	0.00312121	-0.328371	-0.294069	0.109836	-0.0423464	-0.0555707	0.178991	-0.134315	0.0276122			0.134128	0.156667			0.0542563	0.237984	-0.591	-0.6665
Ankrd34c	0.0731923	0.580645	0.201172								0.0267432	-0.246324	0.101957	0.26642	-0.418324	-0.155346	-0.216519	-0.0841071	-0.10005	0.202806	-0.121082	0.133561	-0.111385			-0.0773432	-0.126667					-2.009	-1.254
Ankrd35	0.607427	0.83871		-0.397479	0.476814	-1.65966	2.29068	0.261118	0.315	-0.045	-0.20623	-0.731917	0.0913186	-0.197866	-0.852656	-0.10552	0.177307	0.0741755	-0.114393	-0.090813	0.00564435	-0.0860842	0.138984			-0.0866975	0.16			-0.112622	0.0783762	-0.224	-0.128
Ankrd36	0.126458	1	0.444234	0.0469912	0.283533	-0.234768	0.647247	-0.0305352	0.822491	-0.39652	-0.0340677	-0.0731321	0.137354	0.112945	-0.152331	0.0789323	-0.242104	0.0222271	-0.0275309	-0.0173216	0.0617167	0.0131654	-0.0367442	0.0733333	0.236667	0.082733	0.14	0.0386302	-0.059853	-0.061232	-0.141171	0.193333	0.226
Ankrd37	0.250758	0.83871	0.261877	-1.00717	1.23743	0.0702623	0.182864	0.768003	-0.085	-0.455	-1.65594	-0.628194		0.158978	0.120476	-0.0894985	0.0112691	-1.37627	-0.346413	0.417103	0.0492129	-0.0274975	-0.0900416			-0.0193351	-0.423333			-0.877615	-0.716227	0.358	0.334
Ankrd39	0.330361	0.870968	-0.0618526	-0.400684	-0.739086	0.587319	0.177252	-0.304744	1.29351	0.554731	0.0316085	0.00657582	0.122606	0.0212048	-0.336567	-0.268736	-0.0416275	-0.086129	-0.0195793	0.0140177	0.169559	-0.084094	0.100027			-0.107029	0.166667			-0.094958	-0.314316	0.027	-0.315
Ankrd40	1.43822	1	-0.334242	1.20517	-0.14174	0.274464	0.1407	-0.449054	0.356983	1.37442	-0.148308	0.0404068	-0.24954	0.118817	0.070181	0.052833	-0.192685	0.298358	0.280002	-0.11092	-0.085498	0.10386	0.0654864	-0.166667	0.06	0.0190677	-0.06	-0.12641	-0.0466186	-0.287828	-0.263777	0.0576667	-0.0223333
Ankrd42	0.147332	0.870968	0.21869	-0.510962	0.140373	-0.463749	1.76818	-1.65332	-0.13	0	0.382392	0.906051	-0.0843253	0.0508488	0.299344	0.234976	-0.0216271	0.0249335	-0.0279759	0.283272	0.226067	-0.0925421	0.334194			0.218826	-0.0633333			0.221624	0.128981	-0.239	0.3675
Ankrd44	0.39104	0.967742		1.38885	3.4209	0.262399	2.09167	1.04911	0.00101984	0.201589	0.814416	0.655398	-0.069424	-0.029264	-0.080353	0.0366401	-0.377032	0.209714	-0.305241	-0.00749074	-0.052907	-0.054332	0.202685	-0.0633333	0.00333333	0.840814	0.776667	0.794975	1.54306	0.542404	0.124772	-0.184	-0.272
Ankrd45	0.0602904	0.83871	0.198103	1.20568	0.115477	0.273018	1.02385	0.210882	0.55	-0.515	-0.125048	-0.0795222		-0.0340536	-0.151255	-0.0982991	-0.207904	-0.117611	-0.135636	-0.179254	0.220314	0.022676	-0.0685338			0.0415622	0.26			0.0457666	0.0528886	-0.221	-0.161
Ankrd46	1.06928	1	-0.412071	-0.361304	-0.256984	-0.410027	0.227156	-0.950898	-1.175	0.515	-0.0173536	0.0365914	-0.562581	0.0643792	0.0237684	-0.153752	-0.0687686	0.209044	-0.0420768	0.0757845	-0.163767	0.0662618	0.335988	-0.203333	-0.176667	-0.0177014	-0.273333	-0.336289	0.188319	-0.0758057	0.303181	-0.054	-0.183
Ankrd49	0.6991	1	-0.810037	-0.818858	0.0468722	-0.465343	0.401487	-0.77776	-1.325	1.59	-0.114288	0.0478539	0.116974	-0.318989	-0.058001	0.100954	0.323551	0.550387	0.572589	-0.309944	-0.184557	-0.267519	0.0243931	0.0233333	0.0933333	0.0378102	-0.14	-0.399681	-1.11743	0.00525284	-0.548083	-0.229	-0.417
Ankrd50	1.54498	0.83871		0.0798369	-0.0854869	0.437821	0.613296	0.297857	-1.71	-0.635	0.862151	0.852717	0.41929	0.0992282	0.493347	0.0805285	0.042766	0.42316	0.617747	0.299531	0.207508	-0.0577377	-0.427364			0.168685	0.696667			-0.0220299	-0.28293	-0.250333	-0.165333
Ankrd52	0.967645	0.83871	-0.0328369	0.117963	-0.189314	-0.81842	0.0138058	-0.68687	0.465	0.59	0.0124109	0.00204589		0.0158708	0.237266	0.0497267	0.0674621	-0.103365	-0.236397	0.134542	-0.0129977	-0.154867	0.0744243			0.0253746	0.196667			-0.350644	-1.53666	0.041	-0.169
Ankrd53	0.0874597	0.548387									0.104182	-0.202466	0.0581136	-0.0975882	-0.0753844	-0.18727	-0.270275	0.0987671	-0.0588679	0.308803	0.3059	0.0517296	-0.0250335			0.0283975	-1.1212e-15					0.016	0.156
Ankrd54	1.08152	1	0.106403	-0.749246	0.0337771	-0.309016	0.465962	0.223423	0.318126	-1.16972	-0.144733	0.208977	0.907602	-0.182099	-0.146145	0.0253866	0.112496	-0.686274	-0.693135	0.667152	0.795883	-0.323381	0.0307494	0.15	0.0366667	0.203613	0.0466667	0.382754	0.247219	-0.205656	-0.402335	0.312	0.193
Ankrd55	0.127181	0.870968	-0.000140959	0.0931094	0.557995	-3.10154	-0.321928	0.0680183	0.41	0.48	-0.827976	-1.39317	0.0135917	-0.430307	-0.440985	-0.349021	-0.111974	-0.10875	-0.00862254	-0.0188546	0.149298	0.00577017	0.0126842			0.00724565	-1.61667			-0.24312	0.140566	0.3065	0.785
Ankrd6	0.197536	1	0.452733	-0.608154	-0.332672	-0.217302	-0.0335026	1.57171	0.452203	-0.19012	0.220492	-0.0431821	-0.013571	0.253395	-0.0385659	0.550183	-0.0949322	0.0851675	-0.0552362	0.0767275	0.106986	0.0570135	0.140755	0.113333	0.126667	-0.325768	-0.293333	0.00900544	-0.0891183	0.0668201	-0.0426379	-0.076	0.605
Ankrd60	0.0727466	0.483871									0.0454044	-0.151249		0.144652	-0.101654	-0.090547	0.02408	0.0589705	0.0374966	0.0547839	0.0438144		-0.0293954			0.0984746	0.05					-0.119	-0.828
Ankrd61	0.13907	1	-0.11826	0.382616	-1.47249	-0.893085	0.136635	-0.21266	0.08	-0.035	0.0015338	-0.048134	0.0602043	-0.000610229	-0.42793	-0.132777	-0.287047	-0.275842	0.000923889	-0.0104343	-0.205372	0.15223	-0.172878	-0.0333333	0.256667	-0.0221617	0.09	0.0979247	-0.115627	0.0523405	-0.00503635	-0.122	-0.193
Ankrd63	0.0505829	0.387097		0.247041	1.61775	0.933911	3.08746	-0.335062	0.32	-0.16																	0.113333			0.0231159	-0.0918489	0.014	-0.641
Ankrd65		0.0645161																														0.183	0.512
Ankrd7	0.030394	0.870968	-0.103853	0	0.125531	0.152003	1.66297	-0.117418	0.34	0.375	-0.122569	0.0628316	-0.00776716	0.26602	-0.110283	0.00441478	-0.158301	-0.0494068	0.0184814	0.188989	0.0105632	-0.144257	0.0287404			0.0789809	0.0866667			0.0710062	0.105818	1.258	1.473
Ankrd9	0.386691	0.870968	-0.537868	-2.81619	0.0648604	-0.371299	0.295665	0.367	-0.185	-1.405	-0.210301	-0.0392817	0.0535881	0.0204412	-0.196232	0.0271033	-0.234499	0.0552716	0.0954244	0.159968	0.145729	-0.109485	0.0159264			-0.262638	0.103333			-0.54873	-0.696479	0.127	-0.744
Anks1	0.74729	1	-0.363415	-0.296876	-0.178381	-0.182567	0.405574	-0.83392	-0.165	-0.985	-0.223005	-0.130147	-0.0147296	0.0357589	-0.0921327	-0.150715	0.0240894	0.261356	0.353469	0.0638262	0.0540176	0.128877	0.206921	0.0566667	0.306667	-0.203572	0.276667	0.245944	0.51271	-0.243732	0.107289	0.142	0.292
[truncated: 19,480 more rows]
