# Supplementary material for: Meta-Analysis of EMT Datasets Reveals Different Types of EMT
Source: PLoS One. 2016 Jun 3;11(6):e0156839. doi: 10.1371/journal.pone.0156839 (PMC4892621; doi:10.1371/journal.pone.0156839)
Supplement: S4 Table — 579 genes which had significant expression changes in human samples and their homologues had significant changes in mouse samples were listed with official symbol, ensemble gene ID, p-values and averages. The official symbol, ensemble gene ID, p-values and averages of their homologues in mouse samples were also listed. (XLSX) [file pone.0156839.s004.xlsx]

## Sheet: sheet1 
	Human				Mouse
HomoloGene ID	Symbol	Ensemble Gene ID	P-Value	Ave.	Symbol	Ensemble Gene ID	P-Value	Ave.	Expression Changes
37437	ABCA3	ENSG00000167972	0.000391762	-0.522291	Abca3	ENSMUSG00000024130	0.00175498	-0.224435	Down-regulation
71264	ABCA6	ENSG00000154262	0.0192577	-0.191048	Abca6	ENSMUSG00000044749	0.0307173	-0.168927	Down-regulation
37333	ADH7	ENSG00000196344	0.00127649	-0.253304	Adh7	ENSMUSG00000055301	0.0016041	-0.754884	Down-regulation
12	ADSL	ENSG00000100357	0.014354	-0.0967751	Adsl	ENSMUSG00000022407	0.0122723	-0.151323	Down-regulation
10153	AGPAT5	ENSG00000155189	0.000843003	-0.257233	Agpat5	ENSMUSG00000031467	4.64411e-05	-0.340739	Down-regulation
31165	AKAP1	ENSG00000121057	0.00622155	-0.170633	Akap1	ENSMUSG00000018428	0.00214195	-0.14158	Down-regulation
128661	AKR1C3	ENSG00000196139	0.000106091	-0.608696	Akr1c18	ENSMUSG00000021214	0.010284	-0.579058	Down-regulation
16	ALAD	ENSG00000148218	0.0178873	-0.0909971	Alad	ENSMUSG00000028393	0.000268626	-0.325315	Down-regulation
110441	ALDH1A1	ENSG00000165092	0.0122361	-0.239006	Aldh1a1	ENSMUSG00000053279	0.0012707	-1.05279	Down-regulation
21073	ALDOC	ENSG00000109107	0.00156799	-0.154435	Aldoc	ENSMUSG00000017390	0.00970629	-0.369938	Down-regulation
45968	ANKRD26	ENSG00000107890	0.00262228	-0.413922	Ankrd26	ENSMUSG00000007827	0.0431282	-0.138267	Down-regulation
68445	ANXA3	ENSG00000138772	0.000123829	-0.522567	Anxa3	ENSMUSG00000029484	0.0268038	-0.146763	Down-regulation
41008	ARL6IP1	ENSG00000170540	0.0101079	-0.156118	Arl6ip1	ENSMUSG00000030654	0.00553219	-0.192086	Down-regulation
21151	ATP8B1	ENSG00000081923	0.00662971	-0.149034	Atp8b1	ENSMUSG00000039529	0.0417331	-0.435411	Down-regulation
34602	ATPAF2	ENSG00000171953	0.000852348	-0.253434	Atpaf2	ENSMUSG00000042709	0.000164657	-0.212745	Down-regulation
40581	ATPIF1	ENSG00000130770	0.0146376	-0.126028	Atpif1	ENSMUSG00000054428	0.0434887	-0.0676859	Down-regulation
113516	B3GNT3	ENSG00000179913	0.00195362	-0.255705	B3gnt3	ENSMUSG00000031803	0.039017	-0.186736	Down-regulation
65347	BSX	ENSG00000188909	0.0460375	-0.929926	Bsx	ENSMUSG00000054360	0.0249026	-0.0902962	Down-regulation
134536	C1orf35	ENSG00000143793	0.0101986	-0.153464	2310033P09Rik	ENSMUSG00000020441	0.00582244	-0.142676	Down-regulation
9897	C2orf42	ENSG00000115998	3.13658e-05	-0.486781	C87436	ENSMUSG00000046679	0.01907	-0.109061	Down-regulation
19243	C2orf68	ENSG00000168887	0.0469454	-0.153147	0610030E20Rik	ENSMUSG00000058706	0.045385	-0.0982916	Down-regulation
8066	CASP8AP2	ENSG00000118412	0.000420945	-0.194336	Casp8ap2	ENSMUSG00000028282	0.0424959	-0.154186	Down-regulation
1330	CAV1	ENSG00000105974	9.03697e-05	-0.272702	Cav1	ENSMUSG00000007655	0.0242276	-0.212182	Down-regulation
942	CAV2	ENSG00000105971	7.30729e-06	-0.269247	Cav2	ENSMUSG00000000058	0.00190782	-0.305463	Down-regulation
65296	CBX7	ENSG00000100307	0.0250618	-0.0800543	Cbx7	ENSMUSG00000053411	0.00312354	-0.161613	Down-regulation
67734	CBY3	ENSG00000204659	0.0151982	-0.208694	Cby3	ENSMUSG00000050087	0.0175295	-0.180019	Down-regulation
82238	CCDC85C	ENSG00000205476	0.000333937	-0.231966	Ccdc85c	ENSMUSG00000084883	0.0241198	-0.109209	Down-regulation
41356	CDC42SE2	ENSG00000158985	0.0463456	-0.0942954	Cdc42se2	ENSMUSG00000052298	0.0100646	-0.178327	Down-regulation
8403	CDCA3	ENSG00000111665	0.00962721	-0.185661	Cdca3	ENSMUSG00000023505	0.0115287	-0.344658	Down-regulation
68173	CDS1	ENSG00000163624	0.00611138	-0.326049	Cds1	ENSMUSG00000029330	0.00771123	-0.218377	Down-regulation
32650	CDT1	ENSG00000167513	0.00421105	-0.434113	Cdt1	ENSMUSG00000006585	0.00744738	-0.310101	Down-regulation
3211	CEBPA	ENSG00000184771	5.05209e-05	-0.644072	Cebpa	ENSMUSG00000034957	0.003883	-0.283606	Down-regulation
49525	CENPQ	ENSG00000031691	0.0332152	-0.20293	Cenpq	ENSMUSG00000023919	0.0488223	-0.326606	Down-regulation
6039	COQ6	ENSG00000119723	0.00764635	-0.13165	Coq6	ENSMUSG00000021235	0.00784241	-0.225081	Down-regulation
80170	COX10	ENSG00000006695	2.46628e-06	-0.201794	Cox10	ENSMUSG00000042148	0.0430085	-0.13202	Down-regulation
11526	CRELD2	ENSG00000184164	0.00153284	-0.313617	Creld2	ENSMUSG00000023272	0.0166639	-0.108898	Down-regulation
36281	CRYGC	ENSG00000163254	0.0293778	-0.121586	Crygc	ENSMUSG00000025952	0.00408932	-0.0898345	Down-regulation
2815	CTNNAL1	ENSG00000119326	0.0197739	-0.142036	Ctnnal1	ENSMUSG00000038816	0.0107918	-0.304942	Down-regulation
41475	CYB5A	ENSG00000166347	0.0221497	-0.172605	Cyb5a	ENSMUSG00000024646	0.0124804	-0.285806	Down-regulation
133564	CYP3A7	ENSG00000160870	0.0353387	-0.112698	Cyp3a13	ENSMUSG00000029727	0.00839799	-0.586875	Down-regulation
12698	DDIT4L	ENSG00000145358	0.0157046	-0.24942	Ddit4l	ENSMUSG00000046818	0.00542361	-0.361375	Down-regulation
52110	DDX26B	ENSG00000165359	0.0488141	-0.0580764	Ddx26b	ENSMUSG00000035967	0.0212389	-0.167602	Down-regulation
16386	DEPDC7	ENSG00000121690	0.00787221	-0.258162	Depdc7	ENSMUSG00000027173	0.000112191	-0.534394	Down-regulation
1043	DHODH	ENSG00000102967	0.00549506	-0.173851	Dhodh	ENSMUSG00000031730	0.00501685	-0.22355	Down-regulation
64807	DHRS13	ENSG00000167536	0.000182734	-0.385781	Dhrs13	ENSMUSG00000020834	0.000952471	-0.395845	Down-regulation
9350	DHRS7	ENSG00000100612	0.00020199	-0.41571	Dhrs7	ENSMUSG00000021094	0.0199491	-0.223211	Down-regulation
11654	E2F8	ENSG00000129173	0.000421567	-0.24729	E2f8	ENSMUSG00000046179	0.0140008	-0.462011	Down-regulation
2780	EIF3B	ENSG00000106263	0.00298537	-0.12095	Eif3b	ENSMUSG00000056076	0.0470797	-0.125228	Down-regulation
37841	EIF4EBP3	ENSG00000131503	0.000222839	-0.325334	Eif4ebp3	ENSMUSG00000024483	0.0329863	-0.11918	Down-regulation
7743	EMB	ENSG00000170571	0.00109132	-0.108848	Emb	ENSMUSG00000021728	0.0363104	-0.0795389	Down-regulation
1088	EMP1	ENSG00000134531	0.00110577	-0.310653	Emp1	ENSMUSG00000030208	0.0198712	-0.311385	Down-regulation
5790	ENOPH1	ENSG00000145293	0.0253545	-0.224969	Enoph1	ENSMUSG00000029326	0.00826986	-0.22831	Down-regulation
37457	ENTPD5	ENSG00000187097	0.0113898	-0.195899	Entpd5	ENSMUSG00000021236	0.00484156	-0.520718	Down-regulation
37558	EPHX2	ENSG00000120915	0.0393606	-0.116215	Ephx2	ENSMUSG00000022040	0.0406458	-0.218904	Down-regulation
15878	EPS8L3	ENSG00000198758	0.00284479	-0.248653	Eps8l3	ENSMUSG00000040600	0.0111423	-0.258581	Down-regulation
121891	ERMP1	ENSG00000099219	0.00689862	-0.226746	Ermp1	ENSMUSG00000046324	0.00109232	-0.745078	Down-regulation
10344	ERRFI1	ENSG00000116285	0.0092775	-0.463319	Errfi1	ENSMUSG00000028967	0.0140043	-0.193472	Down-regulation
12323	EXOSC8	ENSG00000120699	0.0353022	-0.0990376	Exosc8	ENSMUSG00000027752	0.0493173	-0.142968	Down-regulation
55740	EZR	ENSG00000092820	0.0320386	-0.16148	Ezr	ENSMUSG00000052397	0.0192788	-0.276718	Down-regulation
107	FABP2	ENSG00000145384	0.00684268	-0.241068	Fabp2	ENSMUSG00000023057	0.0283373	-0.0833612	Down-regulation
83276	FAM155B	ENSG00000130054	0.0156636	-0.153469	Tmem28	ENSMUSG00000071719	0.0314223	-0.113032	Down-regulation
10378	FAM64A	ENSG00000129195	0.0258069	-0.138184	Fam64a	ENSMUSG00000020808	0.0135707	-0.356441	Down-regulation
9791	FAM83E	ENSG00000105523	0.000743082	-0.590444	Fam83e	ENSMUSG00000054161	0.0400973	-0.170959	Down-regulation
9987	FANCL	ENSG00000115392	0.00327751	-0.108615	Fancl	ENSMUSG00000004018	0.000439128	-0.232401	Down-regulation
55800	FASN	ENSG00000169710	0.0396043	-0.0969622	Fasn	ENSMUSG00000025153	0.0367296	-0.149777	Down-regulation
5813	FIGN	ENSG00000182263	0.00173301	-0.201988	Fign	ENSMUSG00000075324	0.0489989	-0.265393	Down-regulation
1148	GCLC	ENSG00000001084	7.0852e-05	-0.352008	Gclc	ENSMUSG00000032350	0.00211924	-0.505287	Down-regulation
20379	GLE1	ENSG00000119392	0.0134692	-0.247503	Gle1	ENSMUSG00000019715	0.00599901	-0.115601	Down-regulation
1152	GPLD1	ENSG00000112293	0.00281717	-0.150696	Gpld1	ENSMUSG00000021340	0.0323955	-0.108504	Down-regulation
4476	GPR19	ENSG00000183150	0.0253295	-0.15189	Gpr19	ENSMUSG00000032641	0.041578	-0.0983193	Down-regulation
2961	GPRC5A	ENSG00000013588	0.00664717	-0.368044	Gprc5a	ENSMUSG00000046733	0.0147963	-0.20089	Down-regulation
49088	GRHPR	ENSG00000137106	0.0189071	-0.244914	Grhpr	ENSMUSG00000035637	0.00422061	-0.249309	Down-regulation
84592	GRTP1	ENSG00000139835	0.00113048	-0.214936	Grtp1	ENSMUSG00000038515	0.048553	-0.306004	Down-regulation
55630	GTF3A	ENSG00000122034	0.0290081	-0.088371	Gtf3a	ENSMUSG00000016503	0.0120188	-0.198552	Down-regulation
130459	HIST1H2AC	ENSG00000180573	0.0150138	-0.243083	Hist1h2ao	ENSMUSG00000094248	0.0433482	-0.263598	Down-regulation
134740	HIST1H2BD	ENSG00000158373	0.00265158	-0.231122	Hist3h2ba	ENSMUSG00000056895	0.0493477	-0.134112	Down-regulation
134481	HIST1H4A	ENSG00000124529	0.0255405	-0.242916	Hist1h4d	ENSMUSG00000061482	0.0160446	-0.229625	Down-regulation
134234	HIST1H4C	ENSG00000124529	0.0194473	-0.224352	Hist2h4	ENSMUSG00000091405	0.00673714	-0.297095	Down-regulation
136776	HIST1H4F	ENSG00000124529	0.0111616	-0.155413	Hist1h4c	ENSMUSG00000060678	0.0353253	-0.197404	Down-regulation
134492	HIST1H4J	ENSG00000124529	0.000714606	-0.425646	Hist1h4f	ENSMUSG00000069274	0.028907	-0.325196	Down-regulation
134468	HIST4H4	ENSG00000124529	0.00863592	-0.231753	Hist1h4i	ENSMUSG00000060639	0.0107312	-0.33413	Down-regulation
37582	HMGB2	ENSG00000164104	0.00400811	-0.170641	Hmgb2	ENSMUSG00000054717	0.00472846	-0.344325	Down-regulation
511	HPX	ENSG00000110169	0.00958278	-0.105635	Hpx	ENSMUSG00000030895	0.00144236	-0.798355	Down-regulation
4037	IDH3A	ENSG00000166411	0.0182601	-0.105972	Idh3a	ENSMUSG00000032279	0.0483576	-0.111818	Down-regulation
6120	IMP3	ENSG00000177971	0.00225631	-0.166094	Imp3	ENSMUSG00000032288	0.0378102	-0.0829196	Down-regulation
68891	IMP4	ENSG00000136718	1.56563e-05	-0.200647	Imp4	ENSMUSG00000026127	0.0018486	-0.12545	Down-regulation
10211	ITFG2	ENSG00000111203	0.00017012	-0.252839	Itfg2	ENSMUSG00000027009	0.0127773	-0.171035	Down-regulation
1677	JAG2	ENSG00000184916	0.0124457	-0.239716	Jag2	ENSMUSG00000005078	0.0250105	-0.227423	Down-regulation
183	KCNA1	ENSG00000111262	8.07496e-05	-0.23457	Kcna1	ENSMUSG00000047976	0.00504725	-0.0981075	Down-regulation
69351	KCNK13	ENSG00000152315	0.000231175	-0.34036	Kcnk13	ENSMUSG00000045404	0.0267121	-0.112537	Down-regulation
37520	KLF5	ENSG00000102554	0.0414164	-0.290599	Klf5	ENSMUSG00000005148	0.0056881	-0.351291	Down-regulation
4741	LGALS2	ENSG00000100079	0.001997	-0.219734	Lgals2	ENSMUSG00000043501	0.0122467	-0.523869	Down-regulation
21239	LGALS4	ENSG00000171747	0.000140456	-0.327774	Lgals4	ENSMUSG00000053964	0.00678728	-1.05989	Down-regulation
197	LIG1	ENSG00000105486	0.00159975	-0.155866	Lig1	ENSMUSG00000056394	0.00909213	-0.39026	Down-regulation
44445	LRRC1	ENSG00000137269	0.000240821	-0.379775	Lrrc1	ENSMUSG00000032352	0.0315634	-0.183937	Down-regulation
11817	LRRC8E	ENSG00000171017	0.00101962	-0.237021	Lrrc8e	ENSMUSG00000046589	0.0168216	-0.154179	Down-regulation
31315	MAFB	ENSG00000204103	0.0260886	-0.14978	Mafb	ENSMUSG00000074622	0.0153423	-0.314953	Down-regulation
1778	MAP1A	ENSG00000166963	8.53543e-06	-0.455189	Map1a	ENSMUSG00000027254	0.00536715	-0.272078	Down-regulation
8056	MAP3K1	ENSG00000095015	0.00928734	-0.197217	Map3k1	ENSMUSG00000021754	0.0155454	-0.272772	Down-regulation
12504	MARVELD3	ENSG00000140832	0.000245	-0.226812	Marveld3	ENSMUSG00000001672	0.0290097	-0.271184	Down-regulation
206	MET	ENSG00000105976	0.00308733	-0.234778	Met	ENSMUSG00000009376	0.000438719	-0.248265	Down-regulation
10865	METTL14	ENSG00000145388	0.00125599	-0.150115	Mettl14	ENSMUSG00000028114	0.0290836	-0.16008	Down-regulation
2599	MFAP5	ENSG00000197614	0.00680762	-0.277344	Mfap5	ENSMUSG00000030116	0.0239233	-0.0696266	Down-regulation
32647	MRPL45	ENSG00000174100	0.00125196	-0.114511	Mrpl45	ENSMUSG00000018882	0.025578	-0.140757	Down-regulation
32205	MRPS18B	ENSG00000137330	0.00382591	-0.109804	Mrps18b	ENSMUSG00000024436	0.036338	-0.105577	Down-regulation
32726	MRPS5	ENSG00000144029	5.03473e-05	-0.138853	Mrps5	ENSMUSG00000027374	0.0313521	-0.10173	Down-regulation
9321	MRPS7	ENSG00000125445	0.00110637	-0.0865889	Mrps7	ENSMUSG00000046756	0.0283969	-0.125719	Down-regulation
31983	MRS2	ENSG00000124532	0.0170551	-0.111863	Mrs2	ENSMUSG00000021339	0.0472592	-0.152153	Down-regulation
149	MSH6	ENSG00000116062	0.00035067	-0.14572	Msh6	ENSMUSG00000005370	0.0109675	-0.265905	Down-regulation
32333	MXD3	ENSG00000213347	0.0323401	-0.231645	Mxd3	ENSMUSG00000021485	0.00427728	-0.250175	Down-regulation
6785	NAT10	ENSG00000135372	0.00566466	-0.108093	Nat10	ENSMUSG00000027185	0.0489776	-0.162011	Down-regulation
9820	NCAPG2	ENSG00000146918	0.0152451	-0.153821	Ncapg2	ENSMUSG00000042029	0.00514646	-0.522985	Down-regulation
3664	NDUFA5	ENSG00000128609	2.81418e-05	-0.147486	Ndufa5	ENSMUSG00000023089	0.0198266	-0.211102	Down-regulation
7440	NFYC	ENSG00000066136	0.0362295	-0.0817229	Nfyc	ENSMUSG00000032897	0.0297582	-0.0881385	Down-regulation
75120	NGEF	ENSG00000066248	0.00172139	-0.134503	Ngef	ENSMUSG00000026259	0.000513277	-0.427455	Down-regulation
121495	NR3C2	ENSG00000151623	0.0129369	-0.242832	Nr3c2	ENSMUSG00000031618	0.00159278	-0.462408	Down-regulation
23377	NUCKS1	ENSG00000069275	0.000126653	-0.150845	Nucks1	ENSMUSG00000026434	0.000857538	-0.240719	Down-regulation
12261	NUDT22	ENSG00000149761	0.00983142	-0.129398	Nudt22	ENSMUSG00000037349	0.0236081	-0.22739	Down-regulation
41286	NUP210	ENSG00000132182	0.0152554	-0.122265	Nup210	ENSMUSG00000030091	0.00102986	-0.422105	Down-regulation
40573	NUPL2	ENSG00000136243	0.00380229	-0.148282	Nupl2	ENSMUSG00000048439	0.0364413	-0.0998895	Down-regulation
1905	OCLN	ENSG00000197822	0.0357725	-0.0947663	Ocln	ENSMUSG00000021638	0.0116576	-0.555036	Down-regulation
36195	OMP	ENSG00000254550	0.00191382	-0.219876	Omp	ENSMUSG00000074006	0.000410307	-0.191042	Down-regulation
41135	ORMDL1	ENSG00000128699	0.000407212	-0.168455	Ormdl1	ENSMUSG00000026097	9.13398e-05	-0.285817	Down-regulation
377	OXCT1	ENSG00000083720	0.0376933	-0.227493	Oxct1	ENSMUSG00000022186	0.0341634	-0.313011	Down-regulation
31288	OXSR1	ENSG00000172939	0.0296704	-0.0787848	Oxsr1	ENSMUSG00000036737	0.0265329	-0.100746	Down-regulation
7881	PADI1	ENSG00000142623	0.00803703	-0.264033	Padi1	ENSMUSG00000025329	0.000430302	-0.392117	Down-regulation
25798	PAIP2B	ENSG00000124374	0.000811409	-0.352023	Paip2b	ENSMUSG00000045896	0.0322576	-0.168787	Down-regulation
13194	PCDH11X	ENSG00000102290	0.000436744	-0.193641	Pcdh11x	ENSMUSG00000034755	0.0310177	-0.110328	Down-regulation
2731	PDXK	ENSG00000160209	0.028264	-0.0991099	Pdxk	ENSMUSG00000032788	7.56769e-05	-0.569938	Down-regulation
75268	PHYKPL	ENSG00000175309	0.00318079	-0.302033	Phykpl	ENSMUSG00000020359	0.00269367	-0.136456	Down-regulation
9914	PIH1D1	ENSG00000104872	0.000243205	-0.151937	Pih1d1	ENSMUSG00000003423	0.0181996	-0.187263	Down-regulation
31227	PKMYT1	ENSG00000127564	0.000380375	-0.405388	Pkmyt1	ENSMUSG00000023908	7.48194e-06	-0.392015	Down-regulation
52172	PLEKHA7	ENSG00000166689	0.0335304	-0.174646	Plekha7	ENSMUSG00000045659	0.0175545	-0.226061	Down-regulation
121939	PLEKHH1	ENSG00000054690	0.0375762	-0.210714	Plekhh1	ENSMUSG00000060716	0.0242345	-0.231428	Down-regulation
68270	PLS1	ENSG00000120756	0.00176829	-0.305647	Pls1	ENSMUSG00000049493	0.00176061	-0.427578	Down-regulation
37653	PMCH	ENSG00000183395	0.0193018	-0.181145	Pmch	ENSMUSG00000035383	0.00358977	-0.259095	Down-regulation
5221	POLG2	ENSG00000136480	0.00238107	-0.150891	Polg2	ENSMUSG00000020718	0.0187209	-0.123688	Down-regulation
32727	POLQ	ENSG00000051341	0.0339947	-0.0709137	Polq	ENSMUSG00000034206	0.000538176	-0.394722	Down-regulation
2026	PPL	ENSG00000118898	0.000247565	-0.807544	Ppl	ENSMUSG00000039457	0.000212639	-0.928486	Down-regulation
33158	PPM1L	ENSG00000163590	0.000619663	-0.283475	Ppm1l	ENSMUSG00000027784	0.0226762	-0.223847	Down-regulation
37661	PPP2R5D	ENSG00000112640	0.00239175	-0.17773	Ppp2r5d	ENSMUSG00000059409	0.027417	-0.122115	Down-regulation
10448	PPT2	ENSG00000168452	0.00138523	-0.154191	Ppt2	ENSMUSG00000015474	0.00376299	-0.301005	Down-regulation
5211	PROSC	ENSG00000147471	0.00471087	-0.442611	Prosc	ENSMUSG00000031485	0.0340563	-0.114838	Down-regulation
11952	PSENEN	ENSG00000205155	0.000371809	-0.208075	Psenen	ENSMUSG00000036835	0.0328082	-0.0792023	Down-regulation
20623	PTPRF	ENSG00000142949	0.020438	-0.162678	Ptprf	ENSMUSG00000033295	0.0378536	-0.304321	Down-regulation
8803	RAB11FIP4	ENSG00000131242	0.00735958	-0.219083	Rab11fip4	ENSMUSG00000017639	0.0494305	-0.138058	Down-regulation
32443	RABGGTA	ENSG00000100949	0.00014751	-0.16345	Rabggta	ENSMUSG00000040472	0.00179854	-0.244789	Down-regulation
14238	RAD51C	ENSG00000108384	0.0001471	-0.160003	Rad51c	ENSMUSG00000007646	2.79182e-05	-0.422087	Down-regulation
8240	RAD54B	ENSG00000197275	0.0031112	-0.165765	Rad54b	ENSMUSG00000078773	0.00900644	-0.404515	Down-regulation
23383	RBM15	ENSG00000162775	0.0483436	-0.100216	Rbm15	ENSMUSG00000048109	0.00762781	-0.137979	Down-regulation
6730	RFC5	ENSG00000111445	8.67044e-05	-0.169166	Rfc5	ENSMUSG00000029363	0.00270902	-0.40005	Down-regulation
12407	RHPN2	ENSG00000131941	0.000709085	-0.397171	Rhpn2	ENSMUSG00000030494	0.00801614	-0.461607	Down-regulation
4680	RPP38	ENSG00000152464	0.0171853	-0.0602841	Rpp38	ENSMUSG00000049950	0.0159311	-0.178136	Down-regulation
41426	RPRD1B	ENSG00000101413	0.032948	-0.0695114	Rprd1b	ENSMUSG00000027651	0.0282935	-0.0898933	Down-regulation
2223	S100A3	ENSG00000188015	0.0268521	-0.496566	S100a3	ENSMUSG00000001021	0.0107897	-0.264389	Down-regulation
44228	SCRIB	ENSG00000180900	0.000133622	-0.146043	Scrib	ENSMUSG00000022568	0.0374189	-0.195787	Down-regulation
8247	SEMA3E	ENSG00000170381	0.00418104	-0.281445	Sema3e	ENSMUSG00000063531	0.000406251	-0.651456	Down-regulation
15031	SEPSECS	ENSG00000109618	0.0308574	-0.108006	Sepsecs	ENSMUSG00000029173	0.00281679	-0.188537	Down-regulation
27040	SGMS1	ENSG00000198964	0.000708857	-0.368126	Sgms1	ENSMUSG00000040451	0.0145085	-0.220315	Down-regulation
23642	SGOL1	ENSG00000129810	0.00622237	-0.191266	Sgol1	ENSMUSG00000023940	0.0262504	-0.365974	Down-regulation
14780	SGSM2	ENSG00000141258	0.00108353	-0.594652	Sgsm2	ENSMUSG00000038351	0.0160884	-0.142307	Down-regulation
23450	SH3BP5	ENSG00000131370	0.0123949	-0.131244	Sh3bp5	ENSMUSG00000021892	0.0036076	-0.240401	Down-regulation
84697	SHROOM2	ENSG00000146950	0.0368695	-0.256443	Shroom2	ENSMUSG00000045180	1.43189e-05	-0.299491	Down-regulation
40825	SIRT5	ENSG00000124523	0.0420537	-0.0810466	Sirt5	ENSMUSG00000054021	0.0439753	-0.104125	Down-regulation
74852	SLC25A42	ENSG00000181035	5.32342e-06	-0.218204	Slc25a42	ENSMUSG00000002346	0.0449321	-0.0921434	Down-regulation
37482	SLC37A4	ENSG00000137700	3.21102e-05	-0.321069	Slc37a4	ENSMUSG00000032114	0.0123247	-0.193722	Down-regulation
4597	SMC1A	ENSG00000072501	0.00028321	-0.161452	Smc1a	ENSMUSG00000041133	0.0117069	-0.149273	Down-regulation
3974	SMC3	ENSG00000108055	0.00336722	-0.111907	Smc3	ENSMUSG00000024974	0.0364095	-0.114781	Down-regulation
11169	SNX16	ENSG00000104497	0.00075503	-0.110767	Snx16	ENSMUSG00000027534	0.0330419	-0.123257	Down-regulation
7955	SPINT2	ENSG00000167642	0.0145544	-0.249826	Spint2	ENSMUSG00000074227	0.00756005	-0.421544	Down-regulation
72212	SPIRE2	ENSG00000204991	0.000172081	-0.287694	Spire2	ENSMUSG00000010154	0.0141732	-0.251461	Down-regulation
71040	SPNS2	ENSG00000183018	0.00176417	-0.32459	Spns2	ENSMUSG00000040447	0.0479631	-0.242305	Down-regulation
105698	SPRR1A	ENSG00000169474	0.0139662	-0.376598	Sprr1a	ENSMUSG00000050359	0.00978719	-0.456936	Down-regulation
17039	STAC3	ENSG00000185482	0.000265123	-0.292794	Stac3	ENSMUSG00000040287	0.0152525	-0.0891837	Down-regulation
7548	STRBP	ENSG00000165209	0.000684272	-0.13223	Strbp	ENSMUSG00000026915	0.0124112	-0.193868	Down-regulation
38201	SULT1C2	ENSG00000198203	0.0341476	-0.202015	Sult1c2	ENSMUSG00000023122	0.018854	-0.863582	Down-regulation
49487	SULT2B1	ENSG00000088002	0.0241632	-0.220441	Sult2b1	ENSMUSG00000003271	0.000503248	-0.660121	Down-regulation
2424	TFAP4	ENSG00000090447	0.00363555	-0.314618	Tfap4	ENSMUSG00000005718	0.0164175	-0.177462	Down-regulation
2431	TGFA	ENSG00000163235	0.0018123	-0.218119	Tgfa	ENSMUSG00000029999	0.0474357	-0.0792724	Down-regulation
2445	TJP1	ENSG00000104067	0.00305049	-0.0848711	Tjp1	ENSMUSG00000030516	0.0467457	-0.140883	Down-regulation
68154	TKT	ENSG00000163931	4.65762e-05	-0.529773	Tkt	ENSMUSG00000021957	0.0224266	-0.157228	Down-regulation
77694	TM6SF2	ENSG00000213996	0.00770148	-0.296857	Tm6sf2	ENSMUSG00000036151	0.0061902	-0.276491	Down-regulation
9417	TMEFF2	ENSG00000144339	0.0478187	-0.101689	Tmeff2	ENSMUSG00000026109	0.00603265	-0.183024	Down-regulation
14519	TMEM161B	ENSG00000164180	0.00494856	-0.172824	Tmem161b	ENSMUSG00000035762	0.0267116	-0.168324	Down-regulation
51638	TMEM71	ENSG00000165071	0.036207	-0.180741	Tmem71	ENSMUSG00000036944	0.021841	-0.296133	Down-regulation
830	TOP2A	ENSG00000131747	0.0084311	-0.1541	Top2a	ENSMUSG00000020914	0.0388071	-0.276964	Down-regulation
2468	TPD52L1	ENSG00000111907	0.00213625	-0.321748	Tpd52l1	ENSMUSG00000000296	0.0185764	-0.346805	Down-regulation
52156	TPRN	ENSG00000176058	0.0275254	-0.261132	Tprn	ENSMUSG00000048707	0.00647816	-0.259468	Down-regulation
17040	TRPV3	ENSG00000167723	0.00723702	-0.0939983	Trpv3	ENSMUSG00000043029	0.00698856	-0.163793	Down-regulation
37759	TST	ENSG00000128311	0.0366299	-0.0779502	Tst	ENSMUSG00000044986	0.000365875	-0.354417	Down-regulation
18991	TTC32	ENSG00000183891	0.0107396	-0.213746	Ttc32	ENSMUSG00000066637	0.033227	-0.117738	Down-regulation
11998	UBR7	ENSG00000012963	0.0159001	-0.101896	Ubr7	ENSMUSG00000041712	0.0360829	-0.121496	Down-regulation
7990	UCK1	ENSG00000130717	0.0454698	-0.222431	Uck1	ENSMUSG00000002550	0.028865	-0.17739	Down-regulation
9455	UIMC1	ENSG00000087206	0.00761937	-0.123326	Uimc1	ENSMUSG00000025878	0.0482103	-0.126748	Down-regulation
69243	URGCP	ENSG00000106608	0.0130337	-0.0537054	Urgcp	ENSMUSG00000049680	0.0158078	-0.180439	Down-regulation
57502	VARS2	ENSG00000137411	0.00560391	-0.113633	Vars2	ENSMUSG00000038838	0.00615499	-0.225278	Down-regulation
11382	WDR54	ENSG00000005448	0.0262559	-0.0754998	Wdr54	ENSMUSG00000030032	0.00777643	-0.194095	Down-regulation
27066	WDR90	ENSG00000161996	0.0184994	-0.0919675	Wdr90	ENSMUSG00000073434	0.00176888	-0.328486	Down-regulation
31152	WEE1	ENSG00000166483	5.46798e-05	-0.20963	Wee1	ENSMUSG00000031016	0.0336842	-0.148287	Down-regulation
10920	WFDC1	ENSG00000103175	0.000851296	-0.264838	Wfdc1	ENSMUSG00000023336	0.0309143	-0.143439	Down-regulation
15994	ZNF623	ENSG00000183309	0.00162813	-0.213437	Zfp623	ENSMUSG00000050846	0.0253887	-0.12028	Down-regulation
41088	ABHD5	ENSG00000011198	0.000252824	0.193048	Abhd5	ENSMUSG00000032540	0.00543066	0.200574	Up-regulation
3783	ABL1	ENSG00000097007	5.32117e-07	0.23244	Abl1	ENSMUSG00000026842	0.00111512	0.212364	Up-regulation
11081	ABR	ENSG00000159842	0.0379887	0.163687	Abr	ENSMUSG00000017631	0.0012808	0.332592	Up-regulation
11227	ACBD3	ENSG00000182827	0.00739912	0.111108	Acbd3	ENSMUSG00000026499	0.00923023	0.111626	Up-regulation
1217	ACP2	ENSG00000134575	5.40307e-06	0.297995	Acp2	ENSMUSG00000002103	0.00589656	0.201765	Up-regulation
74402	ACTG1	ENSG00000184009	0.0012255	0.212128	Actg1	ENSMUSG00000062825	0.00144484	0.0836937	Up-regulation
55553	ACTN1	ENSG00000072110	0.0149924	0.254547	Actn1	ENSMUSG00000015143	0.000382762	0.349591	Up-regulation
55857	ACTN4	ENSG00000130402	1.83524e-05	0.300232	Actn4	ENSMUSG00000054808	0.0288268	0.0858997	Up-regulation
101541	ACTR1B	ENSG00000115073	0.0410991	0.072745	Actr1b	ENSMUSG00000037351	0.00323332	0.116149	Up-regulation
18912	ADAMTSL3	ENSG00000156218	0.00246717	0.219895	Adamtsl3	ENSMUSG00000070469	0.0114664	0.535762	Up-regulation
8945	ADNP2	ENSG00000101544	0.0366001	0.279885	Adnp2	ENSMUSG00000053950	0.0026061	0.0973015	Up-regulation
20135	AK1	ENSG00000106992	0.0307756	0.135168	Ak1	ENSMUSG00000026817	0.000181768	1.0597	Up-regulation
74565	AKR1A1	ENSG00000117448	0.0015461	0.128699	Akr1a1	ENSMUSG00000028692	0.00850748	0.089588	Up-regulation
1231	ALOX5AP	ENSG00000132965	0.00735462	0.478349	Alox5ap	ENSMUSG00000060063	0.00250364	0.259424	Up-regulation
888	AMFR	ENSG00000159461	0.0368627	0.083738	Amfr	ENSMUSG00000031751	0.0332998	0.0799175	Up-regulation
20312	ANXA5	ENSG00000164111	0.0190537	0.0963711	Anxa5	ENSMUSG00000027712	0.000230393	0.174016	Up-regulation
47995	AP1G1	ENSG00000166747	0.00572092	0.230955	Ap1g1	ENSMUSG00000031731	0.0183092	0.0905192	Up-regulation
2908	AP1S2	ENSG00000182287	0.00268881	0.204085	Ap1s2	ENSMUSG00000031367	0.000859478	0.336053	Up-regulation
5335	AP2A2	ENSG00000183020	2.77112e-08	0.433465	Ap2a2	ENSMUSG00000002957	0.009404	0.147023	Up-regulation
5517	ARFGAP1	ENSG00000101199	9.32462e-06	0.162329	Arfgap1	ENSMUSG00000027575	0.0328347	0.148038	Up-regulation
134103	ARFGAP3	ENSG00000100262	0.0455301	0.0796966	Arfgap3	ENSMUSG00000054277	0.000428544	0.288046	Up-regulation
3468	ARHGEF2	ENSG00000116584	7.90766e-06	0.288263	Arhgef2	ENSMUSG00000028059	0.00428163	0.184876	Up-regulation
18820	ARL13B	ENSG00000169379	0.0492925	0.303595	Arl13b	ENSMUSG00000022911	0.00672321	0.137725	Up-regulation
23600	ARL8A	ENSG00000143862	0.00196666	0.218429	Arl8a	ENSMUSG00000026426	0.000148973	0.279799	Up-regulation
86985	ATG2A	ENSG00000110046	0.00560932	0.102056	Atg2a	ENSMUSG00000024773	0.00695249	0.255243	Up-regulation
56672	ATP2C1	ENSG00000017260	0.0228512	0.0815712	Atp2c1	ENSMUSG00000032570	4.41836e-05	0.210425	Up-regulation
31272	ATP6V1G1	ENSG00000136888	0.0146062	0.0686852	Atp6v1g1	ENSMUSG00000039105	0.000442406	0.431051	Up-regulation
35401	ATXN7L3	ENSG00000087152	0.0155701	0.0636582	Atxn7l3	ENSMUSG00000059995	0.0127995	0.130172	Up-regulation
74512	B3GALT2	ENSG00000162630	0.0263114	0.21519	B3galt2	ENSMUSG00000033849	0.0421128	0.35423	Up-regulation
11732	BAALC	ENSG00000164929	0.00509641	0.146438	Baalc	ENSMUSG00000022296	0.00401164	0.275871	Up-regulation
38168	BASP1	ENSG00000176788	0.00788777	0.164642	Basp1	ENSMUSG00000045763	0.00464804	0.192305	Up-regulation
2722	BHLHE40	ENSG00000134107	2.55178e-05	0.3708	Bhlhe40	ENSMUSG00000030103	1.68745e-05	0.795826	Up-regulation
4926	BRAP	ENSG00000089234	0.00281993	0.0897503	Brap	ENSMUSG00000029458	0.000102039	0.148647	Up-regulation
57169	BRSK1	ENSG00000160469	0.000113605	0.259326	Brsk1	ENSMUSG00000035390	0.0301447	0.291368	Up-regulation
11242	C11orf1	ENSG00000137720	0.0416372	0.0752957	1110032A03Rik	ENSMUSG00000037971	0.022263	0.171756	Up-regulation
11471	C11orf49	ENSG00000149179	0.0144561	0.139571	1110051M20Rik	ENSMUSG00000040591	0.0222937	0.131063	Up-regulation
11864	C16orf70	ENSG00000125149	0.0470526	0.191953	D230025D16Rik	ENSMUSG00000031889	0.00977073	0.112285	Up-regulation
105712	C16orf72	ENSG00000182831	0.0472204	0.218174	1810013L24Rik	ENSMUSG00000022507	0.0269817	0.132166	Up-regulation
10103	C1orf106	ENSG00000163362	0.00632578	0.381673	5730559C18Rik	ENSMUSG00000041605	0.00668472	0.297782	Up-regulation
10590	C8orf4	ENSG00000176907	0.00208615	0.812511	1810011O10Rik	ENSMUSG00000056313	0.00105646	0.554197	Up-regulation
936	CALU	ENSG00000128595	0.00210636	0.17987	Calu	ENSMUSG00000029767	0.023505	0.136728	Up-regulation
3620	CAPZB	ENSG00000077549	0.0249203	0.100785	Capzb	ENSMUSG00000028745	2.9179e-05	0.233224	Up-regulation
13240	CCDC102A	ENSG00000135736	0.00131701	0.250949	Ccdc102a	ENSMUSG00000063605	0.0198025	0.199401	Up-regulation
104838	CCL27	ENSG00000213927	0.000651652	0.372188	Gm13306	ENSMUSG00000073888	0.0285598	0.221827	Up-regulation
7826	CCNDBP1	ENSG00000166946	1.84904e-06	0.266507	Ccndbp1	ENSMUSG00000023572	0.00849606	0.155555	Up-regulation
11892	CD276	ENSG00000103855	0.00316962	0.365042	Cd276	ENSMUSG00000035914	0.0148504	0.194979	Up-regulation
31053	CD79A	ENSG00000105369	0.00557228	0.195534	Cd79a	ENSMUSG00000003379	0.0241528	0.169788	Up-regulation
20424	CDH2	ENSG00000170558	0.0426335	0.385976	Cdh2	ENSMUSG00000024304	0.0118639	0.318047	Up-regulation
55666	CDK17	ENSG00000059758	0.000218703	0.412747	Cdk17	ENSMUSG00000020015	0.00958496	0.219239	Up-regulation
27415	CEP120	ENSG00000168944	0.0184381	0.149625	Cep120	ENSMUSG00000048799	0.0414786	0.0953773	Up-regulation
22844	CEP170	ENSG00000143702	0.000103085	0.319116	Cep170	ENSMUSG00000057335	8.58038e-05	0.424327	Up-regulation
1969	CFP	ENSG00000126759	0.00150917	0.150384	Cfp	ENSMUSG00000001128	0.0187232	0.100881	Up-regulation
2718	CGGBP1	ENSG00000163320	0.0352169	0.248958	Cggbp1	ENSMUSG00000054604	0.0365412	0.0915915	Up-regulation
88718	CHKB	ENSG00000100288	0.0362923	0.089087	Chkb	ENSMUSG00000022617	0.00970095	0.128327	Up-regulation
56808	CHST11	ENSG00000171310	0.000159386	0.336677	Chst11	ENSMUSG00000034612	0.000907944	0.571323	Up-regulation
8950	CHSY1	ENSG00000131873	0.00328357	0.280846	Chsy1	ENSMUSG00000032640	0.00118952	0.389221	Up-regulation
28624	CHSY3	ENSG00000198108	0.0444261	0.253892	Chsy3	ENSMUSG00000058152	0.00326475	0.279732	Up-regulation
4653	CIB2	ENSG00000136425	0.0268982	0.107077	Cib2	ENSMUSG00000037493	0.0386349	0.111317	Up-regulation
4970	CKAP4	ENSG00000136026	0.0281912	0.113425	Ckap4	ENSMUSG00000046841	0.00125764	0.461874	Up-regulation
8490	CLIC4	ENSG00000169504	6.63969e-07	0.160946	Clic4	ENSMUSG00000037242	0.00360618	0.280102	Up-regulation
23029	CNNM3	ENSG00000168763	0.0264523	0.14825	Cnnm3	ENSMUSG00000001138	0.0160498	0.151338	Up-regulation
1397	COL16A1	ENSG00000084636	0.000481829	0.295682	Col16a1	ENSMUSG00000040690	0.0146422	0.209494	Up-regulation
69	COL1A2	ENSG00000164692	0.0130932	0.541775	Col1a2	ENSMUSG00000029661	0.0275424	0.254913	Up-regulation
20437	COL4A1	ENSG00000187498	0.0245122	0.30685	Col4a1	ENSMUSG00000031502	0.0164224	0.279706	Up-regulation
68033	COL4A3	ENSG00000169031	0.00445081	0.571199	Col4a3	ENSMUSG00000079465	0.00384736	0.196735	Up-regulation
37917	COL6A3	ENSG00000163359	0.000737216	0.522404	Col6a3	ENSMUSG00000048126	0.027721	0.158438	Up-regulation
73	COL7A1	ENSG00000114270	1.1612e-06	0.648306	Col7a1	ENSMUSG00000025650	0.00879947	0.554664	Up-regulation
10898	COTL1	ENSG00000103187	0.00298371	0.222935	Cotl1	ENSMUSG00000031827	0.00400778	0.499212	Up-regulation
8058	CREB3L1	ENSG00000157613	0.000230378	0.379449	Creb3l1	ENSMUSG00000027230	0.0091523	0.488024	Up-regulation
18690	CREB3L2	ENSG00000182158	0.0173764	0.135409	Creb3l2	ENSMUSG00000038648	6.35277e-06	0.576373	Up-regulation
600	CSF2	ENSG00000164400	0.00694648	0.77433	Csf2	ENSMUSG00000018916	0.0223573	0.603187	Up-regulation
100845	CSNK1G2	ENSG00000133275	7.24627e-06	0.17471	Csnk1g2	ENSMUSG00000003345	0.000407055	0.153097	Up-regulation
37874	CSRP1	ENSG00000159176	0.0110197	0.390519	Csrp1	ENSMUSG00000026421	0.0125807	0.313948	Up-regulation
31194	CTSF	ENSG00000174080	0.0358348	0.134622	Ctsf	ENSMUSG00000083282	0.00531866	0.599098	Up-regulation
20867	CTSS	ENSG00000163131	0.041722	0.442071	Ctss	ENSMUSG00000038642	0.0269057	0.196931	Up-regulation
37471	CTSW	ENSG00000172543	0.0112339	0.155422	Ctsw	ENSMUSG00000024910	0.000348798	1.71126	Up-regulation
45664	CTXN1	ENSG00000178531	0.0466345	0.239734	Ctxn1	ENSMUSG00000048644	0.000616762	0.401747	Up-regulation
10439	CXCR2	ENSG00000180871	0.0302016	0.301111	Cxcr2	ENSMUSG00000026180	0.00491543	0.327805	Up-regulation
22628	CYFIP1	ENSG00000068793	0.000208874	0.326456	Cyfip1	ENSMUSG00000030447	0.000160189	0.174001	Up-regulation
31262	CYTH1	ENSG00000108669	0.0256954	0.194105	Cyth1	ENSMUSG00000017132	0.00213035	0.206902	Up-regulation
10199	DCAF6	ENSG00000143164	0.00430396	0.250221	Dcaf6	ENSMUSG00000026571	0.00208073	0.230776	Up-regulation
9430	DCTN4	ENSG00000132912	3.13052e-05	0.127386	Dctn4	ENSMUSG00000024603	0.000183719	0.150236	Up-regulation
1448	DDB1	ENSG00000167986	0.000132798	0.153771	Ddb1	ENSMUSG00000024740	0.00652619	0.160044	Up-regulation
8935	DLGAP4	ENSG00000080845	0.0140962	0.159898	Dlgap4	ENSMUSG00000061689	0.000295082	0.325627	Up-regulation
68396	DMP1	ENSG00000152592	0.00613602	0.157808	Dmp1	ENSMUSG00000029307	0.0184248	0.3332	Up-regulation
38058	DNAJB6	ENSG00000105993	0.00488079	0.211955	Dnajb6	ENSMUSG00000029131	0.0452958	0.126784	Up-regulation
32155	DNAJB9	ENSG00000128590	1.86747e-05	0.24574	Dnajb9	ENSMUSG00000014905	0.000246023	0.277694	Up-regulation
2486	DNAJC3	ENSG00000102580	0.025289	0.0957706	Dnajc3	ENSMUSG00000022136	0.0192818	0.184258	Up-regulation
7294	DNMT3A	ENSG00000119772	0.048991	0.129721	Dnmt3a	ENSMUSG00000020661	0.00557853	0.222303	Up-regulation
56680	DOCK4	ENSG00000128512	0.00144784	0.333732	Dock4	ENSMUSG00000035954	0.0301242	0.136408	Up-regulation
18773	DPY19L4	ENSG00000156162	1.26945e-05	0.312036	Dpy19l4	ENSMUSG00000045205	1.35496e-05	0.320224	Up-regulation
20361	DPYSL3	ENSG00000113657	0.0136145	0.289199	Dpysl3	ENSMUSG00000024501	0.0130379	0.355906	Up-regulation
5215	DUSP10	ENSG00000143507	0.0165114	0.171629	Dusp10	ENSMUSG00000039384	0.0230995	0.207894	Up-regulation
45491	DUSP28	ENSG00000188542	0.000122746	0.393844	Dusp28	ENSMUSG00000047067	0.00902699	0.253238	Up-regulation
21304	DYNLT3	ENSG00000165169	0.0082509	0.0893566	Dynlt3	ENSMUSG00000031176	0.00447631	0.302298	Up-regulation
12243	EBPL	ENSG00000123179	0.00684238	0.163248	Ebpl	ENSMUSG00000021928	0.0189036	0.127814	Up-regulation
1068	ECE1	ENSG00000117298	0.014812	0.258846	Ece1	ENSMUSG00000057530	9.11195e-05	0.333491	Up-regulation
32339	EFEMP2	ENSG00000172638	0.00751868	0.128139	Efemp2	ENSMUSG00000024909	1.7041e-05	0.380417	Up-regulation
20123	EGR2	ENSG00000122877	0.0031572	0.369511	Egr2	ENSMUSG00000037868	0.00602093	0.4576	Up-regulation
3557	EIF2AK3	ENSG00000172071	0.0323473	0.141168	Eif2ak3	ENSMUSG00000031668	0.000209789	0.323524	Up-regulation
3833	ELK3	ENSG00000111145	0.00188959	0.192261	Elk3	ENSMUSG00000008398	0.000361035	0.415772	Up-regulation
16662	ELMOD2	ENSG00000179387	5.09811e-05	0.164419	Elmod2	ENSMUSG00000035151	0.00853782	0.261273	Up-regulation
12425	ENDOD1	ENSG00000149218	3.14481e-05	0.302919	Endod1	ENSMUSG00000037419	0.0110788	0.467526	Up-regulation
38151	ENPP1	ENSG00000197594	0.000644577	0.460523	Enpp1	ENSMUSG00000037370	0.0321173	0.213166	Up-regulation
32274	EPC2	ENSG00000135999	0.00102365	0.296544	Epc2	ENSMUSG00000069495	0.000700564	0.176049	Up-regulation
37925	EPHB2	ENSG00000133216	0.0461225	0.201483	Ephb2	ENSMUSG00000028664	0.000745033	0.339216	Up-regulation
56754	ERAP1	ENSG00000164307	0.00955704	0.179348	Erap1	ENSMUSG00000021583	3.71366e-05	0.323895	Up-regulation
344	ERCC2	ENSG00000104884	0.00490211	0.085102	Ercc2	ENSMUSG00000030400	0.0342618	0.099424	Up-regulation
37560	ETV6	ENSG00000139083	0.0139146	0.163245	Etv6	ENSMUSG00000030199	0.000906447	0.248926	Up-regulation
37880	FABP7	ENSG00000164434	1.41455e-05	0.437611	Fabp7	ENSMUSG00000019874	0.0298076	0.439212	Up-regulation
22753	FADS1	ENSG00000149485	0.010219	0.197823	Fads1	ENSMUSG00000010663	0.0217349	0.149555	Up-regulation
87245	FAM132B	ENSG00000178752	0.00597051	0.303997	Fam132b	ENSMUSG00000047443	0.0493185	0.264934	Up-regulation
19521	FAM171A1	ENSG00000148468	0.00509461	0.290311	Fam171a1	ENSMUSG00000050530	0.0280701	0.227641	Up-regulation
19571	FAM195B	ENSG00000225663	1.43112e-06	0.27574	Fam195b	ENSMUSG00000061111	0.0154337	0.185453	Up-regulation
27071	FAM76A	ENSG00000009780	0.0154789	0.151094	Fam76a	ENSMUSG00000028878	0.0229348	0.118316	Up-regulation
56774	FBLIM1	ENSG00000162458	0.00422884	0.164141	Fblim1	ENSMUSG00000006219	0.000344739	0.363255	Up-regulation
45323	FHOD3	ENSG00000134775	0.000108844	0.40346	Fhod3	ENSMUSG00000034295	0.00859112	0.539752	Up-regulation
1119	FLNA	ENSG00000196924	0.0176841	0.245217	Flna	ENSMUSG00000031328	0.00334767	0.235597	Up-regulation
69101	FMNL3	ENSG00000161791	0.00745672	0.319883	Fmnl3	ENSMUSG00000023008	0.0373341	0.193789	Up-regulation
1533	FN1	ENSG00000115414	1.99542e-05	0.428235	Fn1	ENSMUSG00000026193	0.000239445	0.991611	Up-regulation
12449	FRMD6	ENSG00000139926	2.24548e-06	0.302036	Frmd6	ENSMUSG00000048285	0.0101772	0.302897	Up-regulation
48068	FYN	ENSG00000010810	0.00111857	0.244108	Fyn	ENSMUSG00000019843	0.00217135	0.385917	Up-regulation
1449	GADD45A	ENSG00000116717	0.044915	0.155983	Gadd45a	ENSMUSG00000036390	0.000115908	0.931733	Up-regulation
41535	GCNT2	ENSG00000111846	0.0020702	0.189555	Gcnt2	ENSMUSG00000021360	0.00235281	0.363071	Up-regulation
31267	GGPS1	ENSG00000152904	0.00832311	0.138627	Ggps1	ENSMUSG00000021302	0.0490388	0.117952	Up-regulation
21357	GLIPR1	ENSG00000139278	5.68593e-05	0.354389	Glipr1	ENSMUSG00000056888	0.0152058	0.406522	Up-regulation
74720	GLIPR2	ENSG00000122694	0.00503057	0.471764	Glipr2	ENSMUSG00000028480	0.000520873	0.594411	Up-regulation
39203	GNAO1	ENSG00000087258	0.0113847	0.168842	Gnao1	ENSMUSG00000031748	0.0162753	0.255608	Up-regulation
69140	GNB4	ENSG00000114450	0.00325916	0.2628	Gnb4	ENSMUSG00000027669	0.00504277	0.350588	Up-regulation
3045	GNG11	ENSG00000127920	0.000581014	0.441535	Gng11	ENSMUSG00000032766	0.0086679	0.554983	Up-regulation
3861	GNG5	ENSG00000174021	0.00061519	0.372392	Gng5	ENSMUSG00000068523	0.0484067	0.128952	Up-regulation
4308	GOLGA3	ENSG00000090615	0.000251154	0.142068	Golga3	ENSMUSG00000029502	0.00780856	0.12849	Up-regulation
38009	GOLGA5	ENSG00000066455	0.0266306	0.0907588	Golga5	ENSMUSG00000021192	0.000120755	0.234378	Up-regulation
9180	GORASP2	ENSG00000115806	1.45294e-06	0.162662	Gorasp2	ENSMUSG00000014959	0.012833	0.125537	Up-regulation
37907	GOSR2	ENSG00000108433	3.90756e-05	0.145998	Gosr2	ENSMUSG00000020946	0.000349037	0.247162	Up-regulation
20155	GPX1	ENSG00000197582	0.0272636	0.313224	Gpx1	ENSMUSG00000063856	0.037597	0.117557	Up-regulation
147	GSN	ENSG00000148180	0.0409667	0.136388	Gsn	ENSMUSG00000026879	0.010923	0.419828	Up-regulation
5150	GUCA2B	ENSG00000044012	0.0113821	0.288685	Guca2b	ENSMUSG00000032978	0.0498218	0.12915	Up-regulation
3892	HAS2	ENSG00000170961	0.00514215	0.296803	Has2	ENSMUSG00000022367	0.00125968	1.40652	Up-regulation
38035	HDLBP	ENSG00000115677	0.000259816	0.141541	Hdlbp	ENSMUSG00000034088	0.000742267	0.158926	Up-regulation
14118	HELZ2	ENSG00000130589	0.0155266	0.166447	Helz2	ENSMUSG00000027580	0.0108379	0.187946	Up-regulation
37273	HK2	ENSG00000159399	0.0385717	0.211714	Hk2	ENSMUSG00000000628	0.000848951	0.477962	Up-regulation
3908	HSPA5	ENSG00000044574	0.0035836	0.189472	Hspa5	ENSMUSG00000026864	0.00448041	0.130816	Up-regulation
20240	HTR1D	ENSG00000179546	0.00420668	0.163268	Htr1d	ENSMUSG00000070687	0.000664488	0.452127	Up-regulation
49242	IFNAR2	ENSG00000159110	0.00366006	0.315965	Ifnar2	ENSMUSG00000022971	0.00243453	0.20515	Up-regulation
12641	IFT43	ENSG00000119650	0.0465698	0.374813	Ift43	ENSMUSG00000007867	0.0129191	0.134851	Up-regulation
1193	IGFBP7	ENSG00000163453	4.03646e-08	0.612998	Igfbp7	ENSMUSG00000036256	0.000784603	0.438085	Up-regulation
17613	IGSF11	ENSG00000144847	0.0155472	0.226247	Igsf11	ENSMUSG00000022790	0.0391632	0.356801	Up-regulation
535	IL11	ENSG00000095752	0.0137232	0.248049	Il11	ENSMUSG00000004371	0.00623702	1.08425	Up-regulation
2862	IL1RL1	ENSG00000115602	0.0275757	0.23397	Il1rl1	ENSMUSG00000026069	0.0224394	0.46983	Up-regulation
1653	INHBA	ENSG00000122641	0.021789	0.29793	Inhba	ENSMUSG00000041324	9.57608e-05	0.703746	Up-regulation
11280	IREB2	ENSG00000136381	0.00685761	0.276964	Ireb2	ENSMUSG00000032293	0.00316165	0.139289	Up-regulation
1658	IRF1	ENSG00000125347	0.000757427	0.816965	Irf1	ENSMUSG00000018899	0.00303192	0.150286	Up-regulation
19065	IRX1	ENSG00000170549	3.00499e-06	0.360415	Irx1	ENSMUSG00000060969	0.0130697	0.223965	Up-regulation
7385	IRX3	ENSG00000177508	0.000257356	0.180202	Irx3	ENSMUSG00000031734	0.00902823	0.258104	Up-regulation
86122	ISOC2	ENSG00000063241	0.00306394	0.297347	Isoc2a	ENSMUSG00000001518	0.0311384	0.0715	Up-regulation
37364	ITGA4	ENSG00000115232	0.00672643	0.398499	Itga4	ENSMUSG00000000555	0.0299909	0.128519	Up-regulation
20508	ITGA5	ENSG00000161638	0.000664393	0.291233	Itga5	ENSMUSG00000022817	0.000319554	0.929942	Up-regulation
20511	ITGB5	ENSG00000082781	0.00120032	0.434344	Itgb5	ENSMUSG00000002799	0.0352121	0.38759	Up-regulation
9524	JKAMP	ENSG00000050130	0.0202016	0.339895	Jkamp	ENSMUSG00000075003	0.00921862	0.156848	Up-regulation
3129	JMJD1C	ENSG00000171988	0.0219308	0.171769	Jmjd1c	ENSMUSG00000037876	0.000867609	0.15492	Up-regulation
68533	KDELR3	ENSG00000100196	0.00169558	0.303561	Kdelr3	ENSMUSG00000010830	6.26552e-06	0.77647	Up-regulation
18945	KDM6B	ENSG00000132510	0.00110642	0.333933	Kdm6b	ENSMUSG00000018476	0.00930624	0.142694	Up-regulation
19370	KIAA1462	ENSG00000165757	0.022239	0.237515	9430020K01Rik	ENSMUSG00000033960	6.33072e-05	0.436721	Up-regulation
2668	KLF11	ENSG00000172059	0.0251606	0.104637	Klf11	ENSMUSG00000020653	0.010821	0.163111	Up-regulation
32288	KLF13	ENSG00000169926	6.47913e-05	0.321042	Klf13	ENSMUSG00000052040	0.036814	0.158714	Up-regulation
931	KLF9	ENSG00000119138	0.00048932	0.293337	Klf9	ENSMUSG00000033863	0.00252813	0.264065	Up-regulation
8631	KLHDC2	ENSG00000165516	0.0122322	0.190332	Klhdc2	ENSMUSG00000020978	0.00297328	0.148932	Up-regulation
23036	KLHL28	ENSG00000179454	0.0488747	0.180432	Klhl28	ENSMUSG00000020948	0.000892972	0.159807	Up-regulation
4061	LAMP1	ENSG00000185896	0.000164518	0.27005	Lamp1	ENSMUSG00000031447	0.0247406	0.155088	Up-regulation
7809	LAMP2	ENSG00000005893	0.0304586	0.439985	Lamp2	ENSMUSG00000016534	0.00760076	0.212835	Up-regulation
1730	LECT2	ENSG00000145826	0.00217386	0.284989	Lect2	ENSMUSG00000021539	0.015176	0.432028	Up-regulation
12731	LIMD2	ENSG00000136490	0.0307284	0.315244	Limd2	ENSMUSG00000040699	0.00291925	0.205289	Up-regulation
41214	LIMS2	ENSG00000072163	0.0283076	0.168869	Lims2	ENSMUSG00000024395	0.00173055	0.367748	Up-regulation
4070	LMAN1	ENSG00000074695	0.0214304	0.137883	Lman1	ENSMUSG00000041891	0.0425911	0.0728605	Up-regulation
22823	LMCD1	ENSG00000071282	0.00569904	0.243827	Lmcd1	ENSMUSG00000057604	0.00173991	0.928118	Up-regulation
8385	LRP12	ENSG00000147650	2.65298e-06	0.275017	Lrp12	ENSMUSG00000022305	3.09678e-05	0.408948	Up-regulation
4027	LRRC32	ENSG00000137507	0.0126932	0.208695	Lrrc32	ENSMUSG00000090958	0.0090102	0.764922	Up-regulation
12997	LRRC8C	ENSG00000171488	0.00903862	0.237191	Lrrc8c	ENSMUSG00000054720	0.000193105	0.478877	Up-regulation
12750	MAGED2	ENSG00000102316	0.0228215	0.245549	Maged2	ENSMUSG00000025268	5.40444e-06	0.470495	Up-regulation
55954	MAN2A2	ENSG00000196547	0.0446764	0.0900762	Man2a2	ENSMUSG00000038886	0.0387457	0.16371	Up-regulation
12021	MAP1LC3A	ENSG00000101460	0.0368776	0.117239	Map1lc3a	ENSMUSG00000027602	0.000891835	0.368344	Up-regulation
69359	MAP1LC3B	ENSG00000140941	0.000801461	0.160896	Map1lc3b	ENSMUSG00000031812	0.00618935	0.255878	Up-regulation
1780	MAP4	ENSG00000047849	3.01286e-06	0.192069	Map4	ENSMUSG00000032479	0.0032907	0.207087	Up-regulation
17009	MAP7D1	ENSG00000116871	4.00158e-05	0.305818	Map7d1	ENSMUSG00000028849	0.0236089	0.226599	Up-regulation
55684	MAPK11	ENSG00000185386	0.0299523	0.104576	Mapk11	ENSMUSG00000053137	0.0397076	0.129965	Up-regulation
56412	MAPKAPK2	ENSG00000162889	0.0273439	0.153359	Mapkapk2	ENSMUSG00000016528	8.12711e-05	0.227727	Up-regulation
40748	MARCKSL1	ENSG00000175130	0.00969829	0.213705	Marcksl1	ENSMUSG00000047945	0.000756088	0.565321	Up-regulation
44552	MCFD2	ENSG00000180398	9.40851e-06	0.231444	Mcfd2	ENSMUSG00000024150	0.000572971	0.275915	Up-regulation
44533	MED10	ENSG00000133398	0.000258808	0.169924	Med10	ENSMUSG00000021598	0.00885178	0.1313	Up-regulation
9601	MEX3C	ENSG00000176624	0.0142557	0.103148	Mex3c	ENSMUSG00000037253	0.00189174	0.160393	Up-regulation
4333	MFAP3	ENSG00000037749	0.020096	0.112978	Mfap3	ENSMUSG00000020522	0.0150226	0.129942	Up-regulation
13100	MFSD9	ENSG00000135953	0.0243826	0.249358	Mfsd9	ENSMUSG00000041945	0.04922	0.157098	Up-regulation
8760	MICAL2	ENSG00000133816	0.0327639	0.136595	Mical2	ENSMUSG00000038244	0.00104023	0.44844	Up-regulation
24911	MICALL1	ENSG00000100139	0.0107728	0.315522	Micall1	ENSMUSG00000033039	0.0261676	0.205482	Up-regulation
72239	MKX	ENSG00000150051	0.00129883	0.128308	Mkx	ENSMUSG00000061013	0.000212674	0.356187	Up-regulation
22851	MLXIP	ENSG00000175727	0.00144338	0.352341	Mlxip	ENSMUSG00000038342	0.0035185	0.123304	Up-regulation
20546	MMP10	ENSG00000166670	0.0375193	0.508999	Mmp10	ENSMUSG00000047562	0.00194419	0.709759	Up-regulation
20547	MMP12	ENSG00000110347	0.00041168	0.717185	Mmp12	ENSMUSG00000049723	0.0138882	0.582708	Up-regulation
55939	MMP16	ENSG00000156103	0.0177352	0.322026	Mmp16	ENSMUSG00000028226	0.0454335	0.128017	Up-regulation
3329	MMP2	ENSG00000087245	0.00871996	0.475013	Mmp2	ENSMUSG00000031740	0.0480478	0.257986	Up-regulation
86043	MORF4L1	ENSG00000185787	0.0490846	0.0606165	Morf4l1	ENSMUSG00000062270	0.013518	0.1321	Up-regulation
9512	MPP5	ENSG00000072415	0.00204512	0.116546	Mpp5	ENSMUSG00000021112	0.0204989	0.146549	Up-regulation
7424	MRAS	ENSG00000158186	0.0358624	0.130148	Mras	ENSMUSG00000032470	0.0139626	0.21043	Up-regulation
71327	MSRB3	ENSG00000174099	0.0165156	0.19041	Msrb3	ENSMUSG00000051236	0.000428046	0.490538	Up-regulation
70926	MTSS1L	ENSG00000132613	0.0216072	0.0934342	Mtss1l	ENSMUSG00000033763	0.0353164	0.116243	Up-regulation
36328	MYO10	ENSG00000145555	0.0133126	0.321114	Myo10	ENSMUSG00000022272	0.00115528	0.332873	Up-regulation
52330	NAV2	ENSG00000166833	0.00538691	0.161253	Nav2	ENSMUSG00000052512	0.0218086	0.277038	Up-regulation
69190	NBEA	ENSG00000172915	0.00321118	0.411326	Nbea	ENSMUSG00000027799	0.0111331	0.207254	Up-regulation
16453	NBEAL1	ENSG00000144426	0.00154655	0.377333	Nbeal1	ENSMUSG00000073664	0.00558487	0.216768	Up-regulation
20794	NCK2	ENSG00000071051	0.000539016	0.637716	Nck2	ENSMUSG00000066877	0.00128613	0.228405	Up-regulation
5719	NCS1	ENSG00000107130	0.00292506	0.256584	Ncs1	ENSMUSG00000062661	0.000223411	0.422884	Up-regulation
4669	NEDD9	ENSG00000111859	0.00157365	0.304118	Nedd9	ENSMUSG00000021365	8.14828e-05	0.538009	Up-regulation
32336	NFATC1	ENSG00000131196	0.0213116	0.18246	Nfatc1	ENSMUSG00000033016	0.00750484	0.280414	Up-regulation
11566	NKAIN1	ENSG00000084628	0.0114183	0.123736	Nkain1	ENSMUSG00000078532	0.0412017	0.383042	Up-regulation
65073	NKAIN2	ENSG00000188580	0.0199101	0.139005	Nkain2	ENSMUSG00000069670	0.0115158	0.231639	Up-regulation
7865	NOTCH2	ENSG00000134250	3.16836e-09	0.175545	Notch2	ENSMUSG00000027878	0.0235041	0.167583	Up-regulation
3351	NOTCH4	ENSG00000112049	2.21857e-09	0.234693	Notch4	ENSMUSG00000015468	0.0205396	0.262336	Up-regulation
2875	NRP2	ENSG00000118257	0.0210459	0.342116	Nrp2	ENSMUSG00000025969	0.00239306	0.408337	Up-regulation
11290	NT5DC2	ENSG00000168268	0.000357689	0.368901	Nt5dc2	ENSMUSG00000071547	0.00702783	0.384025	Up-regulation
1895	NT5E	ENSG00000135318	2.19276e-05	0.330334	Nt5e	ENSMUSG00000032420	0.0132026	0.927186	Up-regulation
68413	NUMBL	ENSG00000105245	0.0485373	0.087153	Numbl	ENSMUSG00000063160	2.15006e-05	0.371412	Up-regulation
31409	OS9	ENSG00000135506	0.030771	0.0791772	Os9	ENSMUSG00000040462	0.0438152	0.118446	Up-regulation
69380	OSBPL9	ENSG00000117859	0.00178242	0.245326	Osbpl9	ENSMUSG00000028559	0.0281467	0.110736	Up-regulation
55495	P4HB	ENSG00000185624	0.00120158	0.168418	P4hb	ENSMUSG00000025130	0.00863108	0.125693	Up-regulation
9970	PACS1	ENSG00000175115	0.0400473	0.278167	Pacs1	ENSMUSG00000024855	0.00604481	0.163523	Up-regulation
4005	PARP3	ENSG00000041880	0.004345	0.209681	Parp3	ENSMUSG00000023249	0.0396862	0.188019	Up-regulation
8357	PCOLCE2	ENSG00000163710	0.0117666	0.175742	Pcolce2	ENSMUSG00000015354	0.000748017	0.698758	Up-regulation
7879	PDCD4	ENSG00000150593	0.00153644	0.283423	Pdcd4	ENSMUSG00000024975	0.00332705	0.415935	Up-regulation
66961	PDE4DIP	ENSG00000178104	0.0304958	0.20006	Pde4dip	ENSMUSG00000038170	0.000308457	0.382027	Up-regulation
3980	PDLIM7	ENSG00000196923	0.00121935	0.249576	Pdlim7	ENSMUSG00000021493	0.000329561	0.546232	Up-regulation
9205	PGM3	ENSG00000013375	0.0146531	0.108825	Pgm3	ENSMUSG00000056131	4.06249e-05	0.294131	Up-regulation
14939	PHYHD1	ENSG00000175287	0.000748977	0.282588	Phyhd1	ENSMUSG00000079484	0.0105058	0.216504	Up-regulation
111783	PICALM	ENSG00000073921	0.0129183	0.104839	Picalm	ENSMUSG00000039361	0.000493711	0.196453	Up-regulation
124356	PIEZO1	ENSG00000103335	0.0466132	0.48704	Piezo1	ENSMUSG00000014444	0.02827	0.23647	Up-regulation
37995	PIP4K2A	ENSG00000150867	7.19849e-06	0.245084	Pip4k2a	ENSMUSG00000026737	0.00328607	0.227261	Up-regulation
716	PLA2G5	ENSG00000127472	0.0447386	0.121842	Pla2g5	ENSMUSG00000041193	0.0375006	0.191675	Up-regulation
9448	PLEKHO1	ENSG00000023902	0.0164825	0.141187	Plekho1	ENSMUSG00000015745	4.25676e-06	0.60897	Up-regulation
448	PLP1	ENSG00000123560	0.00137155	0.220864	Plp1	ENSMUSG00000031425	0.0461102	0.128413	Up-regulation
41353	POGLUT1	ENSG00000163389	0.00470499	0.291724	Poglut1	ENSMUSG00000034064	0.0195556	0.165578	Up-regulation
100569	PPAPDC1B	ENSG00000147535	0.0462903	0.236824	Ppapdc1b	ENSMUSG00000031570	0.00285515	0.29249	Up-regulation
21412	PRAF2	ENSG00000102050	0.0293203	0.142477	Praf2	ENSMUSG00000031149	0.000122566	0.247277	Up-regulation
21182	PRDX2	ENSG00000167815	0.00552269	0.252115	Prdx2	ENSMUSG00000005161	0.000101494	0.214803	Up-regulation
12491	PRRC1	ENSG00000164244	6.70726e-05	0.416645	Prrc1	ENSMUSG00000024594	0.00274737	0.149351	Up-regulation
86889	PSME2	ENSG00000100911	0.0138287	0.237987	Psme2	ENSMUSG00000079197	0.00547064	0.23681	Up-regulation
55872	PTBP3	ENSG00000119314	0.0477369	0.262444	Ptbp3	ENSMUSG00000028382	0.0115661	0.146721	Up-regulation
2122	PTPN11	ENSG00000179295	0.00643274	0.0756039	Ptpn11	ENSMUSG00000043733	0.00762081	0.112376	Up-regulation
31387	PTPRE	ENSG00000132334	0.0236705	0.173511	Ptpre	ENSMUSG00000041836	0.0250503	0.165613	Up-regulation
5001	RAB31	ENSG00000168461	0.0360857	0.0772266	Rab31	ENSMUSG00000056515	0.000220823	0.302118	Up-regulation
9642	RAB33B	ENSG00000172007	5.70995e-05	0.336176	Rab33b	ENSMUSG00000027739	0.0234793	0.125427	Up-regulation
12908	RAB34	ENSG00000109113	0.024065	0.214336	Rab34	ENSMUSG00000002059	0.00506255	0.225697	Up-regulation
104027	RAB5B	ENSG00000111540	0.00051062	0.140831	Rab5b	ENSMUSG00000000711	0.00573991	0.137885	Up-regulation
55697	RAB6A	ENSG00000175582	0.0432401	0.077599	Rab6a	ENSMUSG00000030704	0.0139305	0.134485	Up-regulation
8143	RABGAP1L	ENSG00000152061	0.0155513	0.103508	Rabgap1l	ENSMUSG00000026721	0.000173721	0.233657	Up-regulation
56698	RAD54L2	ENSG00000164080	0.00292197	0.302834	Rad54l2	ENSMUSG00000040661	0.00079165	0.1888	Up-regulation
7508	RAI1	ENSG00000108557	0.00182795	0.172858	Rai1	ENSMUSG00000062115	0.0334012	0.112377	Up-regulation
20632	RALB	ENSG00000144118	3.56804e-06	0.398649	Ralb	ENSMUSG00000004451	0.000171969	0.300948	Up-regulation
35217	RASAL2	ENSG00000075391	0.013716	0.211002	Rasal2	ENSMUSG00000070565	0.00156277	0.326901	Up-regulation
9640	RBMS1	ENSG00000153250	0.00130272	0.134504	Rbms1	ENSMUSG00000026970	0.0290332	0.15654	Up-regulation
49895	RBPMS2	ENSG00000166831	0.00499402	0.232485	Rbpms2	ENSMUSG00000032387	0.0234172	0.334072	Up-regulation
20637	RCN1	ENSG00000049449	0.0108613	0.149671	Rcn1	ENSMUSG00000005973	0.00445892	0.488868	Up-regulation
68377	RHOB	ENSG00000143878	0.000174058	0.333376	Rhob	ENSMUSG00000054364	7.57925e-05	0.746519	Up-regulation
22704	RHOQ	ENSG00000119729	1.40894e-11	0.242427	Rhoq	ENSMUSG00000024143	6.55862e-06	0.755705	Up-regulation
33783	RNF150	ENSG00000170153	0.00331327	0.195598	Rnf150	ENSMUSG00000047747	0.0160042	0.150444	Up-regulation
8501	RNF19A	ENSG00000034677	0.0141855	0.153649	Rnf19a	ENSMUSG00000022280	0.0449707	0.0831208	Up-regulation
34999	RNF19B	ENSG00000116514	0.0056798	0.365893	Rnf19b	ENSMUSG00000028793	0.000313032	0.750673	Up-regulation
11839	RNF34	ENSG00000170633	0.0452302	0.0645547	Rnf34	ENSMUSG00000029474	0.00190006	0.180033	Up-regulation
37711	RNF4	ENSG00000063978	0.039913	0.0638604	Rnf4	ENSMUSG00000029110	0.00755924	0.0976599	Up-regulation
68148	RPS24	ENSG00000138326	0.00056034	0.140208	Rps24	ENSMUSG00000025290	0.0360606	0.113593	Up-regulation
3071	RRAD	ENSG00000166592	0.00450144	0.361281	Rrad	ENSMUSG00000031880	0.001887	0.34383	Up-regulation
2218	RREB1	ENSG00000124782	5.98576e-08	0.426411	Rreb1	ENSMUSG00000039087	0.00116013	0.192718	Up-regulation
10743	RTN4	ENSG00000115310	0.00988858	0.297545	Rtn4	ENSMUSG00000020458	2.93654e-05	0.244338	Up-regulation
3118	S1PR2	ENSG00000175898	0.000101046	0.17799	S1pr2	ENSMUSG00000043895	0.0124827	0.163163	Up-regulation
3829	S1PR3	ENSG00000213694	0.026201	0.280146	S1pr3	ENSMUSG00000067586	0.00382011	0.186554	Up-regulation
6438	SBDS	ENSG00000126524	0.00336076	0.41593	Sbds	ENSMUSG00000025337	0.00381383	0.142207	Up-regulation
3597	SEC22B	ENSG00000218759	0.0064875	0.110873	Sec22b	ENSMUSG00000027879	0.00206571	0.193779	Up-regulation
38288	SEC23IP	ENSG00000107651	1.55123e-06	0.202154	Sec23ip	ENSMUSG00000055319	0.044643	0.0808503	Up-regulation
42056	SEC31A	ENSG00000138674	0.00588531	0.113685	Sec31a	ENSMUSG00000035325	7.9589e-05	0.310946	Up-regulation
55537	SEC61A1	ENSG00000058262	0.000458297	0.251594	Sec61a1	ENSMUSG00000030082	0.0199657	0.0838711	Up-regulation
5220	SEC63	ENSG00000025796	0.0116073	0.0947613	Sec63	ENSMUSG00000019802	0.00305555	0.168849	Up-regulation
41334	SERINC1	ENSG00000111897	0.0336837	0.090312	Serinc1	ENSMUSG00000019877	0.000530355	0.156728	Up-regulation
1965	SERPINF1	ENSG00000132386	0.000998483	0.581646	Serpinf1	ENSMUSG00000000753	0.00518786	0.369667	Up-regulation
44	SERPING1	ENSG00000149131	4.28065e-05	0.869562	Serping1	ENSMUSG00000023224	0.0497167	0.219291	Up-regulation
20331	SERPINH1	ENSG00000149257	0.0365973	0.220442	Serpinh1	ENSMUSG00000070436	0.015907	0.303009	Up-regulation
69145	SH2D3C	ENSG00000095370	0.0211284	0.346733	Sh2d3c	ENSMUSG00000059013	0.0277381	0.173842	Up-regulation
9337	SH3GLB1	ENSG00000097033	0.00394215	0.115143	Sh3glb1	ENSMUSG00000037062	0.00813872	0.20884	Up-regulation
10971	SH3KBP1	ENSG00000147010	0.00145276	0.296664	Sh3kbp1	ENSMUSG00000040990	0.0201709	0.196036	Up-regulation
72248	SIX5	ENSG00000177045	0.00401058	0.169207	Six5	ENSMUSG00000040841	0.0368647	0.140304	Up-regulation
38049	SLC20A1	ENSG00000144136	0.00895229	0.203728	Slc20a1	ENSMUSG00000027397	0.00572964	0.372585	Up-regulation
27550	SLC38A6	ENSG00000139974	0.0304646	0.134518	Slc38a6	ENSMUSG00000044712	0.00825111	0.18937	Up-regulation
62681	SLC39A13	ENSG00000165915	0.000970178	0.238879	Slc39a13	ENSMUSG00000002105	0.0012597	0.282036	Up-regulation
40957	SLC39A2	ENSG00000165794	0.00944339	0.281529	Slc39a2	ENSMUSG00000072572	0.0309473	0.227207	Up-regulation
57135	SLCO5A1	ENSG00000137571	0.00845802	0.302498	Slco5a1	ENSMUSG00000025938	0.0489144	0.0950874	Up-regulation
19082	SLFN14	ENSG00000236320	0.0136309	0.308076	Slfn14	ENSMUSG00000082101	0.0493471	0.103	Up-regulation
21196	SMAD1	ENSG00000170365	0.0104927	0.109389	Smad1	ENSMUSG00000031681	5.49645e-05	0.172869	Up-regulation
4314	SMAD7	ENSG00000101665	0.019963	0.212652	Smad7	ENSMUSG00000025880	0.0036181	0.416682	Up-regulation
134676	SMAP1	ENSG00000112305	0.000121493	0.476347	Smap1	ENSMUSG00000026155	0.00983018	0.197826	Up-regulation
2314	SMARCD3	ENSG00000082014	0.0132483	0.127881	Smarcd3	ENSMUSG00000028949	0.00122967	0.34664	Up-regulation
41490	SMURF2	ENSG00000108854	0.000930175	0.141564	Smurf2	ENSMUSG00000018363	0.000116216	0.322394	Up-regulation
4363	SNAI1	ENSG00000124216	0.0172723	0.309809	Snai1	ENSMUSG00000042821	5.33455e-05	1.02166	Up-regulation
37857	SNAP23	ENSG00000092531	0.000215919	0.380257	Snap23	ENSMUSG00000027287	1.21726e-05	0.357954	Up-regulation
14708	SNED1	ENSG00000162804	0.0291336	0.156283	Sned1	ENSMUSG00000047793	0.00909991	0.364707	Up-regulation
12294	SNX15	ENSG00000110025	0.000236479	0.100677	Snx15	ENSMUSG00000024787	0.00727687	0.270317	Up-regulation
49454	SNX9	ENSG00000130340	0.000737403	0.100021	Snx9	ENSMUSG00000002365	0.000290235	0.27665	Up-regulation
31132	SPARC	ENSG00000113140	0.00529723	0.398976	Sparc	ENSMUSG00000018593	0.00570418	0.331247	Up-regulation
39748	SPHK1	ENSG00000176170	0.00765271	0.243631	Sphk1	ENSMUSG00000061878	0.00538363	0.543116	Up-regulation
68354	SPOP	ENSG00000121067	0.0303632	0.0998979	Spop	ENSMUSG00000057522	0.0209931	0.193084	Up-regulation
11832	SPSB1	ENSG00000171621	0.00107029	0.255476	Spsb1	ENSMUSG00000039911	8.52562e-05	0.955239	Up-regulation
31202	SQSTM1	ENSG00000161011	0.0149275	0.256337	Sqstm1	ENSMUSG00000015837	0.0308859	0.210272	Up-regulation
7960	STAT3	ENSG00000168610	8.39259e-08	0.248626	Stat3	ENSMUSG00000004040	0.000246349	0.276941	Up-regulation
128192	STX12	ENSG00000117758	0.0293571	0.0743311	Stx12	ENSMUSG00000028879	0.0452573	0.08828	Up-regulation
2381	STX5	ENSG00000162236	8.3791e-06	0.515089	Stx5a	ENSMUSG00000010110	9.68291e-05	0.250305	Up-regulation
37973	STX8	ENSG00000170310	5.12844e-05	0.155068	Stx8	ENSMUSG00000020903	0.0119412	0.116168	Up-regulation
9113	SUN2	ENSG00000100242	0.0215833	0.091938	Sun2	ENSMUSG00000042524	0.00571875	0.166063	Up-regulation
117703	SYNJ2	ENSG00000078269	0.0369917	0.134716	Synj2	ENSMUSG00000023805	0.00919535	0.182125	Up-regulation
32700	SYVN1	ENSG00000162298	0.0410476	0.160538	Syvn1	ENSMUSG00000024807	0.0208196	0.16031	Up-regulation
2398	TAGLN	ENSG00000149591	0.012246	0.210471	Tagln	ENSMUSG00000032085	0.0246745	0.551553	Up-regulation
56856	TBC1D1	ENSG00000065882	0.0431444	0.238854	Tbc1d1	ENSMUSG00000029174	0.001759	0.399376	Up-regulation
4368	TBCD	ENSG00000141556	0.00125041	0.103652	Tbcd	ENSMUSG00000039230	0.00184628	0.147361	Up-regulation
4814	TCFL5	ENSG00000101190	0.0253303	0.15938	Tcfl5	ENSMUSG00000038932	0.0386057	0.273994	Up-regulation
1302	TEC	ENSG00000135605	0.00153342	0.197301	Tec	ENSMUSG00000029217	0.0325978	0.15527	Up-regulation
540	TGFB1	ENSG00000105329	0.0317016	0.219493	Tgfb1	ENSMUSG00000002603	0.000572936	0.287677	Up-regulation
2433	TGFB3	ENSG00000119699	6.07485e-05	0.394511	Tgfb3	ENSMUSG00000021253	0.00191415	0.323263	Up-regulation
36321	TIMP1	ENSG00000102265	0.0105841	0.211806	Timp1	ENSMUSG00000001131	0.00222612	0.468627	Up-regulation
20695	TLR2	ENSG00000137462	0.00928347	0.345837	Tlr2	ENSMUSG00000027995	0.0325647	0.218682	Up-regulation
7213	TMED3	ENSG00000166557	0.00488183	0.0949365	Tmed3	ENSMUSG00000032353	0.0136914	0.164703	Up-regulation
17145	TMEM119	ENSG00000183160	0.00561676	0.245184	Tmem119	ENSMUSG00000054675	0.0400219	0.226221	Up-regulation
10116	TMEM140	ENSG00000146859	1.9315e-06	0.371706	Tmem140	ENSMUSG00000057137	0.00450383	0.464352	Up-regulation
14449	TMEM57	ENSG00000204178	0.0176565	0.233518	Tmem57	ENSMUSG00000028826	1.08813e-06	0.178686	Up-regulation
133801	TMF1	ENSG00000144747	0.0047469	0.195624	Tmf1	ENSMUSG00000030059	0.0012257	0.20452	Up-regulation
55636	TNC	ENSG00000041982	0.00835166	0.377171	Tnc	ENSMUSG00000028364	0.000267289	1.30241	Up-regulation
4582	TNFAIP3	ENSG00000118503	0.0180698	0.491845	Tnfaip3	ENSMUSG00000019850	0.0341906	0.253089	Up-regulation
11219	TNS1	ENSG00000079308	2.83765e-05	0.234628	Tns1	ENSMUSG00000055322	0.000279068	0.619301	Up-regulation
18648	TP53INP2	ENSG00000078804	0.0143724	0.111214	Trp53inp2	ENSMUSG00000038375	0.00183707	0.43993	Up-regulation
2469	TPD52L2	ENSG00000101150	0.0130421	0.0860307	Tpd52l2	ENSMUSG00000000827	0.0311152	0.0866563	Up-regulation
75216	TRIB1	ENSG00000173334	0.0347587	0.369598	Trib1	ENSMUSG00000032501	0.0341258	0.0977409	Up-regulation
31159	TRIM26	ENSG00000137313	0.0152546	0.123159	Trim26	ENSMUSG00000024457	8.63213e-05	0.306475	Up-regulation
20847	TRIO	ENSG00000038382	0.000788137	0.310338	Trio	ENSMUSG00000022263	0.00819168	0.207007	Up-regulation
99728	TRIP10	ENSG00000125733	8.5506e-05	0.398683	Trip10	ENSMUSG00000019487	0.0206225	0.132924	Up-regulation
20897	TRIP11	ENSG00000100815	2.15875e-05	0.230458	Trip11	ENSMUSG00000021188	0.0401048	0.116576	Up-regulation
9224	TRPC4AP	ENSG00000100991	9.29948e-07	0.305565	Trpc4ap	ENSMUSG00000038324	0.000274044	0.152137	Up-regulation
9767	TRPM6	ENSG00000119121	0.0186626	0.269802	Trpm6	ENSMUSG00000024727	0.0488128	0.251723	Up-regulation
41762	TSPAN17	ENSG00000048140	0.040137	0.141445	Tspan17	ENSMUSG00000025875	0.00191818	0.214485	Up-regulation
124438	TTC39C	ENSG00000168234	0.028941	0.116394	Ttc39c	ENSMUSG00000024424	7.59816e-05	0.697312	Up-regulation
68498	TUBA1A	ENSG00000167552	0.00721662	0.274902	Tuba1a	ENSMUSG00000072235	0.00348164	0.327401	Up-regulation
20711	TULP3	ENSG00000078246	0.0129358	0.308153	Tulp3	ENSMUSG00000001521	0.0311412	0.139424	Up-regulation
6937	TUSC3	ENSG00000104723	0.0230213	0.110472	Tusc3	ENSMUSG00000039530	0.00185991	0.164672	Up-regulation
10774	TWSG1	ENSG00000128791	0.00336597	0.265811	Twsg1	ENSMUSG00000024098	0.00516092	0.153539	Up-regulation
2342	UAP1	ENSG00000117143	0.0185654	0.131841	Uap1	ENSMUSG00000026670	5.60874e-05	0.366308	Up-regulation
22002	UBA1	ENSG00000130985	0.0358734	0.189048	Uba1	ENSMUSG00000001924	0.0324948	0.142082	Up-regulation
4665	UBD	ENSG00000206468	0.0425982	0.198803	Ubd	ENSMUSG00000035186	0.0101564	0.063765	Up-regulation
11799	UBTD1	ENSG00000165886	0.00106679	0.20689	Ubtd1	ENSMUSG00000025171	0.000416492	0.544869	Up-regulation
2754	USO1	ENSG00000138768	0.0230637	0.161858	Uso1	ENSMUSG00000029407	0.000185127	0.206619	Up-regulation
129879	USP43	ENSG00000154914	0.0479661	0.0756542	Usp43	ENSMUSG00000020905	0.0166114	0.285303	Up-regulation
4121	VAMP7	ENSG00000124333	0.00741709	0.109919	Vamp7	ENSMUSG00000051412	0.0223092	0.10343	Up-regulation
3962	VEGFC	ENSG00000150630	0.000717251	0.508231	Vegfc	ENSMUSG00000031520	0.000672867	0.765149	Up-regulation
5175	VEZF1	ENSG00000136451	0.000603704	0.352151	Vezf1	ENSMUSG00000018377	0.0187702	0.164118	Up-regulation
8267	WBP1	ENSG00000115274	0.00924565	0.255413	Wbp1	ENSMUSG00000030035	0.01582	0.142454	Up-regulation
6628	WDR1	ENSG00000071127	0.000814299	0.141845	Wdr1	ENSMUSG00000005103	0.00103185	0.19475	Up-regulation
11842	WDR19	ENSG00000157796	0.00831	0.138604	Wdr19	ENSMUSG00000037890	0.0201468	0.194034	Up-regulation
48498	WDR45	ENSG00000196998	3.18897e-06	0.243509	Wdr45	ENSMUSG00000039382	1.23155e-05	0.349549	Up-regulation
11408	WDR7	ENSG00000091157	0.00368747	0.292387	Wdr7	ENSMUSG00000040560	0.0111893	0.20683	Up-regulation
86891	WIPF1	ENSG00000115935	0.03787	0.149727	Wipf1	ENSMUSG00000075284	0.00167274	0.262626	Up-regulation
117983	WIPI1	ENSG00000070540	0.000446801	0.300966	Wipi1	ENSMUSG00000041895	1.08852e-07	0.467757	Up-regulation
3401	XPC	ENSG00000154767	0.0457561	0.146889	Xpc	ENSMUSG00000030094	0.0174024	0.122691	Up-regulation
56969	YIPF5	ENSG00000145817	0.00368828	0.113626	Yipf5	ENSMUSG00000024487	0.00654925	0.181927	Up-regulation
4778	YKT6	ENSG00000106636	5.17806e-05	0.280221	Ykt6	ENSMUSG00000002741	7.50903e-05	0.39645	Up-regulation
41097	YPEL5	ENSG00000119801	0.00458553	0.270448	Ypel5	ENSMUSG00000039770	2.96999e-05	0.449407	Up-regulation
9226	ZBTB20	ENSG00000181722	0.0308745	0.232823	Zbtb20	ENSMUSG00000022708	0.031733	0.196883	Up-regulation
8870	ZBTB24	ENSG00000112365	0.00477653	0.205539	Zbtb24	ENSMUSG00000019826	0.0216914	0.144762	Up-regulation
11824	ZC3H12A	ENSG00000163874	0.00199586	0.209668	Zc3h12a	ENSMUSG00000042677	0.00088883	0.269781	Up-regulation
8868	ZEB2	ENSG00000169554	0.0113962	0.251408	Zeb2	ENSMUSG00000026872	0.000177573	0.502371	Up-regulation
64373	ZFAND2A	ENSG00000178381	0.00183271	0.446599	Zfand2a	ENSMUSG00000053581	0.0111922	0.169898	Up-regulation
10667	ZMIZ1	ENSG00000108175	0.000736078	0.209376	Zmiz1	ENSMUSG00000007817	0.00737483	0.219761	Up-regulation
117700	ZNF267	ENSG00000185947	0.000910167	0.117313	D3Ertd254e	ENSMUSG00000033883	0.0495197	0.322203	Up-regulation
9996	ZNF358	ENSG00000198816	0.0256458	0.118338	Zfp358	ENSMUSG00000047264	0.0110977	0.165401	Up-regulation
81391	ZNF703	ENSG00000183779	0.0144809	0.115164	Zfp703	ENSMUSG00000085795	0.0241503	0.178577	Up-regulation
31164	ZYX	ENSG00000159840	0.0299991	0.145741	Zyx	ENSMUSG00000029860	0.00156712	0.463238	Up-regulation
