# Supplementary material for: Meta-Analysis of EMT Datasets Reveals Different Types of EMT
Source: PLoS One. 2016 Jun 3;11(6):e0156839. doi: 10.1371/journal.pone.0156839 (PMC4892621; doi:10.1371/journal.pone.0156839)
Supplement: S7 Table — 105 EMT-induction samples were classified into three groups with distinct EMT induced, strong, medium and weak. Three gene lists were generated from these three groups of samples. (XLSX) [file pone.0156839.s007.xlsx]

## Sheet: 1047 all genes
		Classification by EMT evalution
Symbol	Ensemble Gene ID	Strong-list	Medium-list	Weak-list
AAGAB	ENSG00000103591	1	0	0
AASS	ENSG00000008311	0	1	0
ABCC12	ENSG00000140798	1	0	0
ABHD5	ENSG00000011198	0	1	0
ABI2	ENSG00000138443	0	1	0
ABI3	ENSG00000108798	0	1	0
ABL1	ENSG00000097007	1	1	0
ACBD3	ENSG00000182827	1	0	0
ACOT2	ENSG00000119673	1	0	0
ACP2	ENSG00000134575	0	1	1
ACSS2	ENSG00000131069	0	1	0
ACTN1	ENSG00000072110	0	1	0
ACTN4	ENSG00000130402	0	0	1
ACTR5	ENSG00000101442	1	0	0
ACVR1	ENSG00000115170	1	0	0
ADAM15	ENSG00000143537	0	1	0
ADAM23	ENSG00000114948	1	0	0
ADAMTS1	ENSG00000154734	0	1	0
ADAMTS4	ENSG00000158859	1	0	0
ADAMTS9	ENSG00000163638	1	0	0
ADNP2	ENSG00000101544	0	0	1
ADRA1D	ENSG00000171873	0	1	0
ADRBK1	ENSG00000173020	0	0	1
ADSL	ENSG00000100357	0	1	0
ADSSL1	ENSG00000185100	0	0	1
AFM	ENSG00000079557	1	0	0
AFMID	ENSG00000183077	1	0	0
AGT	ENSG00000135744	0	1	0
AHCY	ENSG00000101444	0	0	1
AKAP12	ENSG00000131016	1	0	0
AKIRIN1	ENSG00000174574	1	0	0
AKR1A1	ENSG00000117448	1	0	0
AKR1B1	ENSG00000085662	1	0	0
AKR1C3	ENSG00000196139	0	1	0
ALDH6A1	ENSG00000119711	0	1	0
ALKBH6	ENSG00000221889	0	0	1
ALKBH7	ENSG00000125652	1	0	0
ALOX5AP	ENSG00000132965	1	0	0
AMFR	ENSG00000159461	1	0	0
AMHR2	ENSG00000135409	1	0	0
AMOTL1	ENSG00000166025	1	0	0
ANGEL1	ENSG00000013523	0	1	0
ANKH	ENSG00000154122	0	1	0
ANKLE1	ENSG00000160117	1	0	0
ANKRD26	ENSG00000107890	0	1	0
ANKRD33B	ENSG00000164236	1	0	0
ANKRD54	ENSG00000100124	1	1	0
ANTXR1	ENSG00000169604	0	1	0
ANXA3	ENSG00000138772	0	1	0
ANXA5	ENSG00000164111	1	0	0
ANXA6	ENSG00000197043	1	0	0
ANXA8	ENSG00000165390	0	1	0
AP1S2	ENSG00000182287	1	0	0
AP2A2	ENSG00000183020	1	1	0
APLP2	ENSG00000084234	0	0	1
AQP1	ENSG00000106125	1	0	0
ARF6	ENSG00000165527	1	0	0
ARFGAP1	ENSG00000101199	0	1	0
ARFGAP3	ENSG00000100262	1	0	0
ARHGEF2	ENSG00000116584	1	1	0
ARL4A	ENSG00000122644	0	1	0
ARL6IP6	ENSG00000177917	0	1	0
ARMC10	ENSG00000170632	0	1	0
ARMC8	ENSG00000114098	1	0	0
ARPC5L	ENSG00000136950	1	0	0
ASAP3	ENSG00000088280	0	0	1
ASB1	ENSG00000065802	1	0	0
ASPA	ENSG00000108381	1	0	0
ASPSCR1	ENSG00000169696	1	0	0
ATG2A	ENSG00000110046	0	1	0
ATHL1	ENSG00000142102	0	0	1
ATP2B1	ENSG00000070961	1	0	0
ATP5G1	ENSG00000159199	0	1	0
ATP6V0D1	ENSG00000159720	0	1	0
ATPAF2	ENSG00000171953	0	0	1
AURKA	ENSG00000087586	0	1	0
AURKB	ENSG00000178999	1	0	0
AXL	ENSG00000167601	0	1	0
B3GAT3	ENSG00000149541	0	0	1
BAALC	ENSG00000164929	0	1	0
BAG4	ENSG00000156735	0	1	0
BAK1	ENSG00000030110	0	1	0
BARD1	ENSG00000138376	0	1	0
BASP1	ENSG00000176788	1	1	0
BBS4	ENSG00000140463	1	0	0
BCL2L11	ENSG00000153094	0	1	0
BET1L	ENSG00000177951	1	0	0
BHLHE40	ENSG00000134107	1	1	0
BICD1	ENSG00000151746	0	1	0
BIN1	ENSG00000136717	1	1	0
BMP1	ENSG00000168487	1	1	0
BMP2K	ENSG00000138756	1	0	0
BRD9	ENSG00000028310	1	0	0
BRI3BP	ENSG00000184992	0	0	1
BTAF1	ENSG00000095564	0	1	0
C11orf24	ENSG00000171067	1	0	0
C12orf29	ENSG00000133641	1	0	0
C16orf70	ENSG00000125149	0	0	1
C1orf106	ENSG00000163362	1	0	0
C1orf21	ENSG00000116667	1	0	0
C1QTNF1	ENSG00000173918	1	0	0
C1R	ENSG00000159403	1	0	0
C1S	ENSG00000182326	1	0	0
C4orf46	ENSG00000205208	0	1	0
C5orf15	ENSG00000113583	1	0	0
C8orf4	ENSG00000176907	1	0	0
C8orf48	ENSG00000164743	0	1	0
CABLES2	ENSG00000149679	0	1	0
CALML4	ENSG00000129007	1	0	0
CAPRIN2	ENSG00000110888	1	0	0
CAPZB	ENSG00000077549	0	1	0
CARD14	ENSG00000141527	1	0	0
CASP7	ENSG00000165806	1	0	0
CASP8AP2	ENSG00000118412	0	1	0
CAV1	ENSG00000105974	0	1	0
CAV2	ENSG00000105971	0	1	0
CBR3	ENSG00000159231	1	0	0
CBX7	ENSG00000100307	0	1	0
CCDC102A	ENSG00000135736	1	0	0
CCDC15	ENSG00000149548	1	0	0
CCDC47	ENSG00000108588	0	0	1
CCL20	ENSG00000115009	1	0	0
CCL27	ENSG00000213927	1	0	0
CCND2	ENSG00000118971	0	1	0
CCNDBP1	ENSG00000166946	0	0	1
CCNH	ENSG00000134480	0	1	0
CCNJ	ENSG00000107443	1	0	0
CD151	ENSG00000177697	1	0	0
CD1D	ENSG00000158473	0	1	0
CD276	ENSG00000103855	1	0	0
CD320	ENSG00000167775	0	1	0
CD40	ENSG00000101017	1	0	0
CD6	ENSG00000013725	1	0	0
CDC37	ENSG00000105401	1	0	0
CDC42EP2	ENSG00000149798	1	0	0
CDC42SE2	ENSG00000158985	0	1	0
CDC5L	ENSG00000096401	1	0	0
CDC6	ENSG00000094804	0	1	0
CDC7	ENSG00000097046	0	1	0
CDCA2	ENSG00000184661	0	1	0
CDCA3	ENSG00000111665	0	1	0
CDCA5	ENSG00000146670	1	0	0
CDCA8	ENSG00000134690	0	1	0
CDK1	ENSG00000170312	1	0	0
CDK16	ENSG00000102225	0	1	0
CDK17	ENSG00000059758	1	0	0
CDK6	ENSG00000105810	0	1	0
CDK9	ENSG00000136807	1	0	0
CDT1	ENSG00000167513	0	1	0
CDX2	ENSG00000165556	0	1	1
CEBPA	ENSG00000184771	0	1	0
CEBPG	ENSG00000153879	1	0	0
CEBPZ	ENSG00000115816	0	1	0
CENPE	ENSG00000138778	0	1	0
CENPI	ENSG00000102384	1	1	0
CENPL	ENSG00000120334	0	1	0
CENPM	ENSG00000100162	0	1	1
CENPN	ENSG00000166451	1	0	0
CENPQ	ENSG00000031691	0	1	0
CENPW	ENSG00000203760	1	1	1
CEP120	ENSG00000168944	1	0	0
CEP170	ENSG00000143702	1	0	0
CERS3	ENSG00000154227	0	0	1
CHAC2	ENSG00000143942	1	0	0
CHEK1	ENSG00000149554	1	0	0
CHKB	ENSG00000100288	0	0	1
CHN2	ENSG00000106069	1	1	0
CHPF2	ENSG00000033100	1	0	0
CHST11	ENSG00000171310	1	1	0
CHST14	ENSG00000169105	0	1	0
CHSY3	ENSG00000198108	1	0	0
CHUK	ENSG00000213341	0	0	1
CIDEB	ENSG00000136305	1	0	0
CISD1	ENSG00000122873	1	0	0
CKAP4	ENSG00000136026	1	0	0
CKS1B	ENSG00000173207	0	1	0
CLIC4	ENSG00000169504	1	1	0
CMPK1	ENSG00000162368	0	1	0
CMPK2	ENSG00000134326	1	0	0
CNBP	ENSG00000169714	0	1	0
CNDP2	ENSG00000133313	1	0	0
CNNM1	ENSG00000119946	0	1	0
CNNM3	ENSG00000168763	0	1	0
CNOT10	ENSG00000182973	0	1	1
CNTROB	ENSG00000170037	1	0	0
COL16A1	ENSG00000084636	1	1	0
COL27A1	ENSG00000196739	1	0	0
COL4A1	ENSG00000187498	1	0	0
COL4A2	ENSG00000134871	0	1	0
COL4A4	ENSG00000081052	0	1	0
COL6A3	ENSG00000163359	1	1	0
COL7A1	ENSG00000114270	1	1	0
COPS7A	ENSG00000111652	1	0	0
COQ5	ENSG00000110871	0	1	0
COQ9	ENSG00000088682	0	1	0
CORO1C	ENSG00000110880	0	1	0
COTL1	ENSG00000103187	1	0	0
COX10	ENSG00000006695	0	1	0
COX18	ENSG00000163626	0	1	0
CREB3	ENSG00000107175	1	0	0
CREB3L1	ENSG00000157613	1	0	0
CREB3L2	ENSG00000182158	1	0	0
CREM	ENSG00000095794	1	0	0
CRISPLD2	ENSG00000103196	1	0	0
CSF1R	ENSG00000182578	0	1	0
CSF2	ENSG00000164400	1	0	0
CSNK1E	ENSG00000213923	1	0	0
CSNK1G2	ENSG00000133275	1	0	0
CSRNP1	ENSG00000144655	0	1	0
CSRP1	ENSG00000159176	0	1	0
CSRP2	ENSG00000175183	0	1	0
CTNND1	ENSG00000198561	0	1	0
CTSB	ENSG00000164733	1	0	0
CTSE	ENSG00000196188	1	1	0
CTSH	ENSG00000103811	0	0	1
CTSW	ENSG00000172543	0	1	0
CTSZ	ENSG00000101160	0	1	0
CWF19L1	ENSG00000095485	1	0	0
CXCL2	ENSG00000081041	1	0	0
CYB5A	ENSG00000166347	0	1	0
CYFIP1	ENSG00000068793	1	1	0
CYP2C18	ENSG00000108242	1	0	0
CYR61	ENSG00000142871	1	0	0
CYTH2	ENSG00000105443	1	0	0
CYTH4	ENSG00000100055	0	1	0
DCP2	ENSG00000172795	0	1	0
DCTN4	ENSG00000132912	1	1	0
DDB1	ENSG00000167986	1	0	0
DDX17	ENSG00000100201	1	0	0
DDX26B	ENSG00000165359	0	1	0
DENND2D	ENSG00000162777	0	1	0
DEPDC7	ENSG00000121690	0	1	0
DGAT1	ENSG00000185000	1	0	0
DGKZ	ENSG00000149091	0	1	0
DHCR7	ENSG00000172893	1	0	0
DIO3	ENSG00000197406	0	1	0
DLGAP4	ENSG00000080845	1	0	0
DNA2	ENSG00000138346	1	0	0
DNAJB4	ENSG00000162616	1	0	0
DNAJB6	ENSG00000105993	0	1	0
DNAJB9	ENSG00000128590	1	0	0
DNAJC12	ENSG00000108176	1	0	0
DNAJC9	ENSG00000213551	1	0	0
DNM2	ENSG00000079805	0	1	0
DNMT1	ENSG00000130816	1	1	0
DNMT3A	ENSG00000119772	0	1	0
DOCK5	ENSG00000147459	0	1	0
DPY19L4	ENSG00000156162	0	1	1
DSTN	ENSG00000125868	0	1	0
DTL	ENSG00000143476	1	0	0
DUSP10	ENSG00000143507	1	0	0
DUSP13	ENSG00000079393	0	1	0
DUSP28	ENSG00000188542	1	1	0
DUSP8	ENSG00000184545	1	0	0
DVL1	ENSG00000107404	0	0	1
DYRK3	ENSG00000143479	1	0	0
DYSF	ENSG00000135636	0	0	1
DYX1C1	ENSG00000128845	0	1	0
E2F2	ENSG00000007968	1	0	0
E2F8	ENSG00000129173	0	1	0
EBAG9	ENSG00000147654	0	1	0
ECE1	ENSG00000117298	1	0	0
ECT2	ENSG00000114346	1	0	0
EHMT2	ENSG00000204371	0	1	0
EIF2AK3	ENSG00000172071	1	0	0
EIF3B	ENSG00000106263	0	1	0
ELK1	ENSG00000126767	1	0	0
ELK3	ENSG00000111145	1	0	0
ELOVL6	ENSG00000170522	1	0	0
ELP3	ENSG00000134014	0	1	0
EML4	ENSG00000143924	1	0	0
EMP3	ENSG00000142227	1	0	0
ENDOD1	ENSG00000149218	1	1	0
ENOPH1	ENSG00000145293	0	1	0
EPB41	ENSG00000159023	1	0	0
EPB41L4B	ENSG00000095203	0	1	0
EPC2	ENSG00000135999	0	1	0
EPHB1	ENSG00000154928	1	0	0
EPS8	ENSG00000151491	0	1	0
EPS8L3	ENSG00000198758	0	1	0
ERCC2	ENSG00000104884	1	0	0
ERCC6	ENSG00000032514	1	0	0
ERCC6L	ENSG00000186871	1	0	0
ERI1	ENSG00000104626	0	0	1
ERRFI1	ENSG00000116285	0	1	0
ESPL1	ENSG00000135476	1	0	0
ETFA	ENSG00000140374	1	0	0
ETV3	ENSG00000117036	1	0	0
ETV5	ENSG00000171656	1	0	0
ETV6	ENSG00000139083	1	0	0
EXOSC2	ENSG00000130713	0	0	1
EXOSC8	ENSG00000120699	0	1	0
EXTL3	ENSG00000012232	0	1	0
FABP7	ENSG00000164434	1	0	0
FAM129A	ENSG00000135842	1	0	0
FAM129B	ENSG00000136830	0	1	0
FAM132B	ENSG00000178752	1	0	0
FAM136A	ENSG00000035141	0	0	1
FAM149A	ENSG00000109794	0	1	0
FAM160B2	ENSG00000158863	1	0	0
FAM167A	ENSG00000154319	1	0	0
FAM173A	ENSG00000103254	1	0	0
FAM195B	ENSG00000225663	1	1	1
FAM46A	ENSG00000112773	0	1	0
FAM49A	ENSG00000197872	0	0	1
FAM53B	ENSG00000189319	0	0	1
FAM64A	ENSG00000129195	0	1	1
FAM92A1	ENSG00000188343	0	0	1
FANCL	ENSG00000115392	0	1	0
FANCM	ENSG00000187790	0	1	0
FARP1	ENSG00000152767	0	1	0
FASTKD2	ENSG00000118246	0	1	0
FBXL12	ENSG00000127452	1	0	0
FBXO17	ENSG00000161241	0	1	0
FBXO30	ENSG00000118496	1	0	0
FBXO36	ENSG00000153832	1	0	0
FCRLB	ENSG00000162746	1	0	0
FEN1	ENSG00000168496	1	0	0
FERMT1	ENSG00000101311	1	0	0
FES	ENSG00000182511	0	1	0
FEZ2	ENSG00000171055	1	0	0
FHOD3	ENSG00000134775	0	1	0
FICD	ENSG00000198855	0	0	1
FKBP14	ENSG00000106080	1	0	0
FKBP1A	ENSG00000088832	0	1	0
FLRT3	ENSG00000125848	0	1	0
FMNL3	ENSG00000161791	1	0	0
FMO1	ENSG00000010932	1	0	0
FN1	ENSG00000115414	1	1	0
FNBP4	ENSG00000109920	0	1	0
FNDC7	ENSG00000143107	0	0	1
FOXC1	ENSG00000054598	0	1	0
FOXD1	ENSG00000183900	1	0	0
FOXD3	ENSG00000187140	0	0	1
FOXO1	ENSG00000150907	1	0	0
FOXRED1	ENSG00000110074	0	1	0
FRMD6	ENSG00000139926	1	1	0
FRMD8	ENSG00000126391	1	0	0
FUNDC1	ENSG00000069509	0	1	0
FXYD5	ENSG00000089327	1	0	0
FYB	ENSG00000082074	0	1	0
FYN	ENSG00000010810	1	0	0
GADD45A	ENSG00000116717	0	1	0
GAS2L1	ENSG00000185340	1	0	0
GAS2L2	ENSG00000132139	0	1	0
GAS2L3	ENSG00000139354	0	1	0
GCKR	ENSG00000084734	0	0	1
GCLC	ENSG00000001084	0	1	0
GCNT2	ENSG00000111846	1	0	0
GFER	ENSG00000127554	0	0	1
GHR	ENSG00000112964	0	1	0
GIPC2	ENSG00000137960	1	0	0
GLI3	ENSG00000106571	1	0	0
GMPPA	ENSG00000144591	0	1	0
GMPPB	ENSG00000173540	1	0	0
GMPR	ENSG00000137198	0	0	1
GNA11	ENSG00000088256	0	0	1
GNAO1	ENSG00000087258	0	1	0
GNB4	ENSG00000114450	1	0	0
GNG11	ENSG00000127920	1	0	0
GNGT2	ENSG00000167083	1	0	0
GOLGA3	ENSG00000090615	0	1	0
GOLPH3L	ENSG00000143457	1	0	0
GORASP2	ENSG00000115806	1	1	0
GOSR1	ENSG00000108587	0	1	0
GOSR2	ENSG00000108433	1	0	0
GPATCH4	ENSG00000160818	0	0	1
GPHN	ENSG00000171723	0	0	1
GPT2	ENSG00000166123	0	1	0
GPX1	ENSG00000197582	0	1	0
GPX4	ENSG00000167468	1	0	0
GPX8	ENSG00000164294	1	0	0
GREB1L	ENSG00000141449	0	1	0
GRSF1	ENSG00000132463	0	1	0
GSG2	ENSG00000177602	0	1	0
GSN	ENSG00000148180	1	0	0
GTF3A	ENSG00000122034	0	1	0
GTSE1	ENSG00000075218	1	1	0
GUCA2B	ENSG00000044012	1	0	0
H2AFV	ENSG00000105968	1	0	0
H2AFZ	ENSG00000164032	0	1	0
HAS2	ENSG00000170961	1	0	0
HAT1	ENSG00000128708	1	0	0
HAUS6	ENSG00000147874	0	1	0
HAUS7	ENSG00000183479	0	1	0
HDAC5	ENSG00000108840	1	0	0
HDGF	ENSG00000143321	1	0	0
HDLBP	ENSG00000115677	1	1	0
HERPUD1	ENSG00000051108	1	0	0
HEY1	ENSG00000164683	0	1	0
HEYL	ENSG00000163909	0	0	1
HIF1A	ENSG00000100644	0	1	0
HINT1	ENSG00000169567	0	1	0
HIST1H4J	ENSG00000197238	0	0	1
HIST2H3D	ENSG00000183598	0	1	0
HIST2H4A	ENSG00000270882	0	1	0
HIVEP1	ENSG00000095951	0	1	0
HJURP	ENSG00000123485	1	0	0
HLCS	ENSG00000159267	1	0	0
HMGB2	ENSG00000164104	0	0	1
HMOX1	ENSG00000100292	1	0	0
HNRNPH3	ENSG00000096746	0	1	0
HP	ENSG00000197711	0	1	0
HPGDS	ENSG00000163106	0	1	0
HPX	ENSG00000110169	0	1	0
HRH1	ENSG00000196639	1	0	0
HS3ST3B1	ENSG00000125430	0	1	0
HSF2BP	ENSG00000160207	0	1	0
HSPA5	ENSG00000044574	1	1	0
HYAL2	ENSG00000068001	0	1	0
ICAM1	ENSG00000090339	1	0	0
IDH2	ENSG00000182054	0	0	1
IER3IP1	ENSG00000134049	1	0	0
IFIT3	ENSG00000119917	0	1	0
IFNGR2	ENSG00000159128	1	0	0
IFT20	ENSG00000109083	1	0	0
IGFBP7	ENSG00000163453	1	1	0
IGSF11	ENSG00000144847	1	1	0
IKBKE	ENSG00000143466	1	0	0
IL12B	ENSG00000113302	0	0	1
IL6ST	ENSG00000134352	1	0	0
IMMP1L	ENSG00000148950	0	0	1
IMMT	ENSG00000132305	0	1	0
IMP4	ENSG00000136718	0	1	0
IMPA1	ENSG00000133731	0	1	0
IMPDH1	ENSG00000106348	0	1	0
IMPG2	ENSG00000081148	0	1	0
INPPL1	ENSG00000165458	1	0	0
IPPK	ENSG00000127080	0	0	1
IQGAP3	ENSG00000183856	1	0	0
IQSEC1	ENSG00000144711	0	1	0
IREB2	ENSG00000136381	0	1	0
IRX1	ENSG00000170549	0	0	1
IRX3	ENSG00000177508	1	0	0
ITFG2	ENSG00000111203	0	0	1
ITGA2	ENSG00000164171	0	1	0
ITGA5	ENSG00000161638	1	0	0
ITGB2	ENSG00000160255	0	1	0
ITGB3	ENSG00000056345	1	0	0
ITGB5	ENSG00000082781	0	1	0
ITPA	ENSG00000125877	0	0	1
ITPR2	ENSG00000123104	1	0	0
IWS1	ENSG00000163166	0	0	1
JAG1	ENSG00000101384	1	0	0
JKAMP	ENSG00000050130	0	1	0
JMJD1C	ENSG00000171988	0	1	0
JMJD4	ENSG00000081692	1	1	0
KCNA1	ENSG00000111262	0	0	1
KCNK12	ENSG00000184261	1	0	0
KDELR1	ENSG00000105438	1	0	0
KDELR3	ENSG00000100196	1	1	0
KDM6B	ENSG00000132510	1	0	0
KEAP1	ENSG00000079999	1	0	0
KIAA0020	ENSG00000080608	0	1	0
KIAA0101	ENSG00000166803	1	0	0
KIF13B	ENSG00000197892	0	1	0
KIF15	ENSG00000163808	1	0	0
KIF18A	ENSG00000121621	0	1	0
KIF22	ENSG00000079616	0	1	0
KIF23	ENSG00000137807	0	1	0
KIFC3	ENSG00000140859	1	0	0
KLF11	ENSG00000172059	1	0	0
KLF13	ENSG00000169926	1	1	0
KLF2	ENSG00000127528	1	0	0
KLF6	ENSG00000067082	1	0	0
KLF9	ENSG00000119138	1	1	0
KLHL11	ENSG00000178502	0	1	0
KLHL24	ENSG00000114796	0	1	0
KNTC1	ENSG00000184445	0	0	1
KPNA4	ENSG00000186432	0	1	0
KRT7	ENSG00000135480	0	1	0
LACTB2	ENSG00000147592	1	0	0
LAMP1	ENSG00000185896	0	0	1
LAPTM5	ENSG00000162511	1	0	0
LARGE	ENSG00000133424	0	1	0
LAS1L	ENSG00000001497	0	1	0
LCOR	ENSG00000196233	1	0	0
LCP1	ENSG00000136167	1	0	0
LDLRAD3	ENSG00000179241	0	1	0
LECT2	ENSG00000145826	1	0	0
LEMD2	ENSG00000161904	1	0	0
LGALS3	ENSG00000131981	1	0	0
LGR6	ENSG00000133067	0	1	0
LIFR	ENSG00000113594	0	1	0
LIG1	ENSG00000105486	0	1	0
LIMD2	ENSG00000136490	1	0	0
LIMS1	ENSG00000169756	1	0	0
LMBR1L	ENSG00000139636	1	0	0
LMCD1	ENSG00000071282	0	1	0
LONRF1	ENSG00000154359	1	0	0
LRP12	ENSG00000147650	1	1	0
LRRC1	ENSG00000137269	0	1	0
LRRC14	ENSG00000160959	0	0	1
LRRC14B	ENSG00000185028	0	1	0
LRRC32	ENSG00000137507	1	0	0
LRRC8C	ENSG00000171488	1	0	0
LTBP1	ENSG00000049323	1	0	0
LY75	ENSG00000054219	0	0	1
LZTR1	ENSG00000099949	1	1	0
MAB21L3	ENSG00000173212	1	0	0
MAD2L1	ENSG00000164109	0	1	0
MAEA	ENSG00000090316	0	0	1
MAFF	ENSG00000185022	1	1	0
MAFG	ENSG00000197063	1	0	0
MAGED1	ENSG00000179222	1	0	0
MAMDC4	ENSG00000177943	0	0	1
MAML3	ENSG00000196782	1	0	0
MAN1A1	ENSG00000111885	1	0	0
MAN2A2	ENSG00000196547	0	0	1
MAN2B1	ENSG00000104774	1	0	0
MAP1B	ENSG00000131711	1	0	0
MAP1LC3A	ENSG00000101460	0	1	0
MAP1LC3B	ENSG00000140941	0	1	0
MAP1S	ENSG00000130479	1	0	0
MAP3K5	ENSG00000197442	1	0	0
MAP4	ENSG00000047849	1	1	0
MAP4K2	ENSG00000168067	1	0	0
MAP7D1	ENSG00000116871	1	1	0
MAPK11	ENSG00000185386	1	0	0
MAPK6	ENSG00000069956	0	1	0
MAPKAPK2	ENSG00000162889	0	1	0
MARCKSL1	ENSG00000175130	0	1	0
MASTL	ENSG00000120539	1	0	0
MAX	ENSG00000125952	1	0	0
MBIP	ENSG00000151332	0	1	0
MCFD2	ENSG00000180398	1	1	0
MCM10	ENSG00000065328	1	0	0
MCM4	ENSG00000104738	0	1	0
MCM5	ENSG00000100297	1	1	0
MCM6	ENSG00000076003	1	0	0
MCM7	ENSG00000166508	0	1	0
MCM8	ENSG00000125885	0	1	0
MECR	ENSG00000116353	1	0	0
MED10	ENSG00000133398	1	0	0
MED18	ENSG00000130772	1	0	0
MED9	ENSG00000141026	1	0	0
MEF2A	ENSG00000068305	1	0	0
MELK	ENSG00000165304	1	0	0
MESDC2	ENSG00000117899	0	1	0
MET	ENSG00000105976	0	1	0
METTL5	ENSG00000138382	0	1	0
MEX3D	ENSG00000181588	0	1	0
MFAP1	ENSG00000140259	1	0	0
MFAP3	ENSG00000037749	0	1	0
MFHAS1	ENSG00000147324	0	1	0
MGEA5	ENSG00000198408	0	1	0
MGLL	ENSG00000074416	1	0	0
MICAL2	ENSG00000133816	1	0	0
MICALL1	ENSG00000100139	0	0	1
MID1IP1	ENSG00000165175	1	0	0
MKX	ENSG00000150051	1	1	0
MLXIP	ENSG00000175727	1	0	0
MMD	ENSG00000108960	1	0	0
MMP13	ENSG00000137745	0	1	0
MMP9	ENSG00000100985	0	1	0
MOAP1	ENSG00000165943	0	1	0
MPO	ENSG00000005381	0	1	0
MPST	ENSG00000128309	1	0	0
MRC1	ENSG00000120586	0	0	1
MRPL10	ENSG00000159111	0	1	0
MRPL14	ENSG00000180992	0	1	0
MRPL16	ENSG00000166902	0	1	0
MRPL18	ENSG00000112110	1	0	0
MRPL27	ENSG00000108826	1	0	0
MRPL37	ENSG00000116221	0	1	0
MRPL4	ENSG00000105364	1	0	0
MRPL40	ENSG00000185608	0	1	0
MRPL42	ENSG00000198015	0	1	0
MRPL45	ENSG00000174100	0	1	0
MRPL47	ENSG00000136522	0	1	0
MRPS14	ENSG00000120333	0	1	0
MRPS15	ENSG00000116898	1	0	0
MRPS18C	ENSG00000163319	0	1	0
MRPS5	ENSG00000144029	0	1	0
MRPS6	ENSG00000214955	0	1	0
MSH6	ENSG00000116062	0	1	0
MSRB3	ENSG00000174099	1	0	0
MVK	ENSG00000110921	1	0	0
MYBL1	ENSG00000185697	1	0	0
MYLK	ENSG00000065534	1	0	0
MYO19	ENSG00000141140	0	1	0
MYOT	ENSG00000120729	1	0	0
NAA38	ENSG00000128534	0	1	0
NALCN	ENSG00000102452	0	0	1
NANP	ENSG00000170191	0	1	0
NAT10	ENSG00000135372	0	0	1
NBEA	ENSG00000172915	0	1	0
NCAPG2	ENSG00000146918	0	1	0
NCAPH	ENSG00000121152	1	1	0
NCK2	ENSG00000071051	0	1	0
NCS1	ENSG00000107130	1	0	0
NDUFA5	ENSG00000128609	0	1	0
NDUFA6	ENSG00000184983	1	0	0
NDUFA9	ENSG00000139180	1	0	0
NEDD1	ENSG00000139350	0	1	0
NEDD9	ENSG00000111859	0	1	1
NEK2	ENSG00000117650	1	0	0
NEURL3	ENSG00000163121	1	0	0
NFATC1	ENSG00000131196	0	1	0
NGDN	ENSG00000129460	0	1	0
NGEF	ENSG00000066248	0	1	0
NHP2	ENSG00000145912	0	0	1
NICN1	ENSG00000145029	1	0	0
NID2	ENSG00000087303	1	0	0
NIN	ENSG00000100503	1	1	0
NLGN2	ENSG00000169992	1	0	0
NLK	ENSG00000087095	1	0	0
NME6	ENSG00000172113	0	1	0
NOTCH2	ENSG00000134250	1	1	0
NOTCH4	ENSG00000204301	1	1	0
NR2E3	ENSG00000031544	0	0	1
NRBF2	ENSG00000148572	1	0	0
NRM	ENSG00000137404	1	0	0
NSUN7	ENSG00000179299	0	1	0
NT5E	ENSG00000135318	1	1	0
NTAN1	ENSG00000157045	1	0	0
NUB1	ENSG00000013374	1	0	0
NUCB2	ENSG00000070081	1	0	0
NUCKS1	ENSG00000069275	0	1	0
NUDT19	ENSG00000213965	0	1	0
NUDT22	ENSG00000149761	0	1	0
NUF2	ENSG00000143228	0	1	0
NUP155	ENSG00000113569	0	0	1
NUP205	ENSG00000155561	0	1	0
NUP35	ENSG00000163002	0	1	1
NUP54	ENSG00000138750	0	1	0
NUP62	ENSG00000213024	1	0	0
NUP85	ENSG00000125450	1	0	0
NUPR1	ENSG00000176046	1	0	0
NUSAP1	ENSG00000137804	0	1	0
OR10W1	ENSG00000172772	0	1	0
ORC1	ENSG00000085840	1	0	0
ORC6	ENSG00000091651	1	1	0
ORMDL1	ENSG00000128699	0	1	0
OS9	ENSG00000135506	0	1	0
OSBPL9	ENSG00000117859	0	0	1
OSGEPL1	ENSG00000128694	0	0	1
OTUD4	ENSG00000164164	1	0	0
P4HB	ENSG00000185624	0	1	0
PADI1	ENSG00000142623	0	0	1
PAFAH2	ENSG00000158006	1	0	0
PAIP1	ENSG00000172239	0	1	0
PAPSS2	ENSG00000198682	0	1	0
PARP8	ENSG00000151883	0	1	0
PASK	ENSG00000115687	1	0	0
PBXIP1	ENSG00000163346	0	1	0
PCCB	ENSG00000114054	0	0	1
PCDH1	ENSG00000156453	0	1	0
PCDH7	ENSG00000169851	0	1	0
PCNA	ENSG00000132646	1	0	0
PCOLCE	ENSG00000106333	1	1	0
PCOLCE2	ENSG00000163710	1	0	0
PDCD4	ENSG00000150593	0	0	1
PDE2A	ENSG00000186642	0	1	0
PDGFD	ENSG00000170962	0	0	1
PDGFRB	ENSG00000113721	0	1	0
PDIA4	ENSG00000155660	1	0	0
PDLIM7	ENSG00000196923	0	1	0
PDSS1	ENSG00000148459	1	0	0
PDZK1IP1	ENSG00000162366	1	0	0
PEX11B	ENSG00000131779	0	1	0
PEX7	ENSG00000112357	0	1	0
PFDN5	ENSG00000123349	0	0	1
PGM3	ENSG00000013375	1	0	0
PGP	ENSG00000184207	1	0	0
PHC2	ENSG00000134686	0	1	0
PHF1	ENSG00000112511	0	0	1
PHF23	ENSG00000040633	0	1	0
PHLDA3	ENSG00000174307	0	1	0
PHTF1	ENSG00000116793	1	0	0
PIEZO1	ENSG00000103335	1	0	0
PIGA	ENSG00000165195	0	1	0
PIH1D1	ENSG00000104872	0	1	0
PIP4K2A	ENSG00000150867	1	1	0
PKD1	ENSG00000008710	0	1	0
PKHD1	ENSG00000170927	0	1	0
PKIG	ENSG00000168734	1	0	0
PKMYT1	ENSG00000127564	0	1	1
PLAT	ENSG00000104368	0	1	0
PLEKHJ1	ENSG00000104886	0	0	1
PLEKHO1	ENSG00000023902	0	1	0
PLIN3	ENSG00000105355	1	0	0
PLK4	ENSG00000142731	0	1	0
PML	ENSG00000140464	1	0	0
PNKP	ENSG00000039650	0	1	0
PNRC2	ENSG00000189266	0	1	0
POC1A	ENSG00000164087	0	1	1
POLE	ENSG00000177084	1	0	0
POLE2	ENSG00000100479	0	1	0
POLG2	ENSG00000136480	0	1	0
POLH	ENSG00000170734	1	0	0
POLQ	ENSG00000051341	0	1	0
POLR3D	ENSG00000168495	1	0	0
PPFIBP1	ENSG00000110841	1	0	0
PPIG	ENSG00000138398	0	1	0
PPIH	ENSG00000171960	0	1	0
PPM1D	ENSG00000170836	0	1	0
PPP1R15A	ENSG00000087074	1	0	0
PPP2R5D	ENSG00000112640	0	1	0
PPP3CA	ENSG00000138814	0	1	0
PPT2	ENSG00000221988	0	1	0
PRADC1	ENSG00000135617	1	0	0
PRAF2	ENSG00000102050	1	0	0
PRDX2	ENSG00000167815	0	1	0
PRKAB1	ENSG00000111725	1	0	0
PROSC	ENSG00000147471	0	1	0
PRR11	ENSG00000068489	0	1	0
PRR14	ENSG00000156858	1	0	0
PRR5L	ENSG00000135362	1	0	0
PRRC1	ENSG00000164244	1	0	0
PRRG3	ENSG00000130032	0	0	1
PRRG4	ENSG00000135378	0	1	0
PRSS23	ENSG00000150687	0	1	0
PSAP	ENSG00000197746	0	1	0
PSAT1	ENSG00000135069	1	0	0
PSD	ENSG00000059915	0	1	0
PSKH1	ENSG00000159792	0	1	0
PSMA4	ENSG00000041357	1	0	0
PSMC3IP	ENSG00000131470	1	0	0
PSMD8	ENSG00000099341	1	0	0
PTCD2	ENSG00000049883	0	1	0
PTDSS1	ENSG00000156471	0	1	0
PTGES3	ENSG00000110958	0	1	0
PTGFR	ENSG00000122420	1	0	0
PTGR2	ENSG00000140043	0	0	1
PTK2B	ENSG00000120899	0	1	0
PTOV1	ENSG00000104960	1	0	0
PTPN11	ENSG00000179295	0	1	0
PTPN21	ENSG00000070778	1	0	0
PTPN6	ENSG00000111679	0	1	0
PTPRS	ENSG00000105426	0	0	1
PTS	ENSG00000150787	1	1	0
PYCR1	ENSG00000183010	1	0	0
QKI	ENSG00000112531	0	1	0
RAB11FIP5	ENSG00000135631	1	0	0
RAB31	ENSG00000168461	0	1	0
RAB33B	ENSG00000172007	0	0	1
RAB3B	ENSG00000169213	1	0	0
RAB5B	ENSG00000111540	0	1	0
RAB6A	ENSG00000175582	0	1	0
RABAC1	ENSG00000105404	1	1	0
RABGGTA	ENSG00000100949	0	1	0
RAD18	ENSG00000070950	0	1	0
RAD51	ENSG00000051180	0	1	0
RAD51AP1	ENSG00000111247	0	1	0
RAD51C	ENSG00000108384	0	1	0
RAD54B	ENSG00000197275	0	1	0
RAD54L	ENSG00000085999	0	1	0
RAD54L2	ENSG00000164080	1	0	0
RALB	ENSG00000144118	1	1	0
RAP1B	ENSG00000127314	1	0	0
RAPGEF6	ENSG00000158987	0	1	0
RASA3	ENSG00000185989	1	0	0
RASAL2	ENSG00000075391	0	1	0
RBM15	ENSG00000162775	0	1	0
RBPMS2	ENSG00000166831	1	0	0
RCBTB1	ENSG00000136144	0	0	1
RCL1	ENSG00000120158	0	0	1
RECQL	ENSG00000004700	1	0	0
RELA	ENSG00000173039	1	0	0
RELT	ENSG00000054967	1	1	0
RFC5	ENSG00000111445	0	1	0
RFK	ENSG00000135002	0	1	0
RFWD3	ENSG00000168411	1	0	0
RGS20	ENSG00000147509	1	0	0
RHEBL1	ENSG00000167550	1	0	0
RHOB	ENSG00000143878	1	0	0
RHOG	ENSG00000177105	0	1	0
RHOQ	ENSG00000119729	1	1	1
RIC8A	ENSG00000177963	1	0	0
RILPL2	ENSG00000150977	1	0	0
RIPK2	ENSG00000104312	1	0	0
RMI1	ENSG00000178966	0	1	0
RNASEK	ENSG00000219200	1	0	0
RNF128	ENSG00000133135	1	0	0
RNF141	ENSG00000110315	0	1	0
RNF19B	ENSG00000116514	1	0	0
RNF215	ENSG00000099999	0	1	0
RNF24	ENSG00000101236	1	0	0
RNF34	ENSG00000170633	1	0	0
RNF6	ENSG00000127870	0	1	0
RPA2	ENSG00000117748	1	0	0
RPAP1	ENSG00000103932	0	1	0
RPAP3	ENSG00000005175	0	1	0
RPF2	ENSG00000197498	0	0	1
RPRD1B	ENSG00000101413	0	1	0
RQCD1	ENSG00000144580	0	1	0
RRAD	ENSG00000166592	1	0	0
RRAS2	ENSG00000133818	1	0	0
RREB1	ENSG00000124782	1	1	1
RRM1	ENSG00000167325	1	0	0
RRM2	ENSG00000171848	1	0	0
RTN4	ENSG00000115310	1	0	0
RWDD1	ENSG00000111832	0	0	1
S100A10	ENSG00000197747	0	0	1
S100A3	ENSG00000188015	0	0	1
S100A6	ENSG00000197956	1	0	0
S1PR2	ENSG00000175898	1	0	0
SAE1	ENSG00000142230	0	1	0
SAFB2	ENSG00000130254	1	0	0
SAMD14	ENSG00000167100	0	1	0
SAMD4A	ENSG00000020577	1	0	0
SAMD8	ENSG00000156671	1	1	0
SAMHD1	ENSG00000101347	1	0	0
SAR1A	ENSG00000079332	1	0	0
SARM1	ENSG00000004139	1	1	0
SCRIB	ENSG00000180900	0	1	0
SCYL1	ENSG00000142186	1	1	0
SDCBP2	ENSG00000125775	0	1	0
SDHAF1	ENSG00000205138	0	1	0
SDHC	ENSG00000143252	0	1	0
SEC13	ENSG00000157020	1	0	0
SEC22B	ENSG00000218759	1	0	0
SEC23A	ENSG00000100934	1	0	0
SEC31A	ENSG00000138674	1	1	0
SELP	ENSG00000174175	0	1	0
SEMA4C	ENSG00000168758	0	1	0
SERPINF1	ENSG00000132386	1	0	0
SESN2	ENSG00000130766	1	0	0
SETD3	ENSG00000183576	0	0	1
SETD8	ENSG00000183955	1	0	0
SGOL1	ENSG00000129810	0	1	0
SGPP2	ENSG00000163082	0	1	0
SGSM2	ENSG00000141258	0	1	0
SH2B3	ENSG00000111252	1	0	0
SH3BGRL3	ENSG00000142669	0	0	1
SH3GLB1	ENSG00000097033	1	0	0
SH3KBP1	ENSG00000147010	1	1	0
SH3PXD2A	ENSG00000107957	0	0	1
SH3RF1	ENSG00000154447	1	1	0
SHCBP1	ENSG00000171241	1	0	0
SHROOM2	ENSG00000146950	0	1	1
SLC12A9	ENSG00000146828	1	0	0
SLC20A1	ENSG00000144136	1	0	0
SLC25A13	ENSG00000004864	0	1	0
SLC25A16	ENSG00000122912	0	1	0
SLC25A35	ENSG00000125434	1	0	0
SLC25A37	ENSG00000147454	1	0	0
SLC25A39	ENSG00000013306	1	0	0
SLC25A4	ENSG00000151729	0	1	0
SLC2A9	ENSG00000109667	1	0	0
SLC30A1	ENSG00000170385	1	0	0
SLC33A1	ENSG00000169359	1	0	0
SLC35F2	ENSG00000110660	1	0	0
SLC37A4	ENSG00000137700	0	1	0
SLC39A13	ENSG00000165915	1	0	0
SLC39A3	ENSG00000141873	1	0	0
SLC9A1	ENSG00000090020	0	1	0
SLC9A9	ENSG00000181804	1	0	0
SLCO2A1	ENSG00000174640	1	0	0
SLCO5A1	ENSG00000137571	1	0	0
SMARCD3	ENSG00000082014	1	0	0
SMARCE1	ENSG00000073584	0	1	0
SMC1A	ENSG00000072501	0	1	0
SMC3	ENSG00000108055	0	1	0
SMC4	ENSG00000113810	1	0	0
SMC6	ENSG00000163029	0	0	1
SMCHD1	ENSG00000101596	0	1	0
SMTN	ENSG00000183963	0	1	0
SMURF2	ENSG00000108854	1	0	0
SNAI1	ENSG00000124216	1	0	0
SNAP23	ENSG00000092531	0	1	1
SNAP47	ENSG00000143740	0	1	0
SNTA1	ENSG00000101400	0	1	0
SNX11	ENSG00000002919	0	1	0
SNX15	ENSG00000110025	1	1	0
SNX9	ENSG00000130340	1	1	0
SOCS3	ENSG00000184557	0	1	0
SOD2	ENSG00000112096	1	0	0
SP1	ENSG00000185591	0	1	0
SPC25	ENSG00000152253	1	0	0
SPHK1	ENSG00000176170	1	0	0
SPIN4	ENSG00000186767	1	0	0
SPIRE2	ENSG00000204991	0	1	0
SPOP	ENSG00000121067	1	0	0
SPRYD4	ENSG00000176422	0	0	1
SPSB1	ENSG00000171621	1	1	0
SQSTM1	ENSG00000161011	1	0	0
SS18L2	ENSG00000008324	1	0	0
ST3GAL3	ENSG00000126091	1	0	0
STAC3	ENSG00000185482	0	0	1
STAG1	ENSG00000118007	0	0	1
STARD4	ENSG00000164211	1	0	0
STAT3	ENSG00000168610	1	1	1
STAT5A	ENSG00000126561	1	0	0
STIL	ENSG00000123473	1	0	0
STK17B	ENSG00000081320	1	0	0
STRA13	ENSG00000169689	1	0	0
STRA6	ENSG00000137868	1	0	0
STX5	ENSG00000162236	1	1	0
STX8	ENSG00000170310	1	0	0
STXBP6	ENSG00000168952	0	1	0
STYK1	ENSG00000060140	1	0	0
SURF4	ENSG00000148248	1	0	0
SUZ12	ENSG00000178691	0	1	0
SV2A	ENSG00000159164	1	0	0
SYCE2	ENSG00000161860	0	1	0
SYN1	ENSG00000008056	1	0	0
SYT11	ENSG00000132718	1	0	0
TACR2	ENSG00000075073	0	1	0
TAGLN2	ENSG00000158710	1	0	0
TAMM41	ENSG00000144559	0	0	1
TBC1D1	ENSG00000065882	0	1	0
TBC1D10A	ENSG00000099992	1	1	0
TBC1D16	ENSG00000167291	0	1	0
TBCD	ENSG00000141556	1	0	0
TCF19	ENSG00000137310	1	0	0
TCIRG1	ENSG00000110719	1	1	1
TDP1	ENSG00000042088	0	1	0
TEC	ENSG00000135605	0	1	0
TEX261	ENSG00000144043	0	0	1
TFAM	ENSG00000108064	0	0	1
TFAP4	ENSG00000090447	0	1	0
TGFB1	ENSG00000105329	1	0	0
TGFB3	ENSG00000119699	0	0	1
TGFBR2	ENSG00000163513	1	0	0
TH	ENSG00000180176	0	0	1
THUMPD1	ENSG00000066654	0	0	1
THUMPD3	ENSG00000134077	0	1	0
TIMELESS	ENSG00000111602	1	0	0
TIMM17A	ENSG00000134375	1	0	0
TIMP1	ENSG00000102265	1	0	0
TIRAP	ENSG00000150455	0	1	0
TJP1	ENSG00000104067	0	1	0
TKT	ENSG00000163931	0	1	0
TLCD1	ENSG00000160606	0	1	0
TLR1	ENSG00000174125	1	0	0
TLR2	ENSG00000137462	0	1	0
TLR3	ENSG00000164342	1	0	0
TMC6	ENSG00000141524	0	1	0
TMCC2	ENSG00000133069	1	0	0
TMED3	ENSG00000166557	0	1	0
TMEM104	ENSG00000109066	0	1	0
TMEM109	ENSG00000110108	0	1	0
TMEM119	ENSG00000183160	1	0	0
TMEM140	ENSG00000146859	1	1	0
TMEM141	ENSG00000244187	1	0	0
TMEM161B	ENSG00000164180	0	1	0
TMEM175	ENSG00000127419	1	0	0
TMEM185B	ENSG00000179724	1	0	0
TMEM222	ENSG00000186501	1	0	0
TMEM51	ENSG00000171729	1	0	0
TMEM57	ENSG00000204178	0	1	0
TMEM71	ENSG00000165071	0	1	0
TMEM97	ENSG00000109084	1	0	0
TMF1	ENSG00000144747	0	1	0
TNC	ENSG00000041982	1	0	0
TNFAIP8L1	ENSG00000185361	1	0	0
TNFRSF11B	ENSG00000164761	1	0	0
TNFRSF12A	ENSG00000006327	0	1	0
TNIP2	ENSG00000168884	1	0	0
TNIP3	ENSG00000050730	1	0	0
TNK2	ENSG00000061938	0	1	0
TNS1	ENSG00000079308	1	1	0
TOMM70A	ENSG00000154174	0	1	0
TOP2A	ENSG00000131747	0	1	0
TP53INP2	ENSG00000078804	1	0	0
TPCN2	ENSG00000162341	0	0	1
TPH1	ENSG00000129167	0	0	1
TPP1	ENSG00000166340	0	1	0
TPX2	ENSG00000088325	1	0	0
TRAF2	ENSG00000127191	1	0	0
TRAF5	ENSG00000082512	0	1	0
TRAPPC10	ENSG00000160218	1	0	0
TRIM26	ENSG00000234127	0	1	0
TRIM3	ENSG00000110171	1	0	0
TRIML2	ENSG00000179046	1	0	0
TRIO	ENSG00000038382	0	1	0
TRIP10	ENSG00000125733	1	1	0
TRIP13	ENSG00000071539	1	0	0
TRPC4AP	ENSG00000100991	1	1	0
TSFM	ENSG00000123297	0	1	0
TSPAN14	ENSG00000108219	0	1	1
TSPAN32	ENSG00000064201	0	1	0
TSPAN5	ENSG00000168785	1	0	0
TTC16	ENSG00000167094	0	0	1
TUBA1A	ENSG00000167552	1	0	0
TUBB	ENSG00000196230	0	1	0
TULP3	ENSG00000078246	0	1	0
TUSC3	ENSG00000104723	1	0	0
TWSG1	ENSG00000128791	0	1	0
TXNDC12	ENSG00000117862	1	0	0
TYMS	ENSG00000176890	1	0	0
TYRO3	ENSG00000092445	1	1	0
UAP1	ENSG00000117143	1	0	0
UBASH3B	ENSG00000154127	1	0	0
UBE2D1	ENSG00000072401	0	1	0
UBTD1	ENSG00000165886	1	1	0
UGT2B10	ENSG00000109181	1	0	0
UHRF1	ENSG00000034063	1	0	0
UHRF1BP1L	ENSG00000111647	1	0	0
ULK2	ENSG00000083290	0	1	0
USF1	ENSG00000158773	1	0	0
USP1	ENSG00000162607	1	0	0
USP14	ENSG00000101557	0	1	0
USP22	ENSG00000124422	1	0	0
USP43	ENSG00000154914	1	0	0
USP46	ENSG00000109189	0	1	0
VAMP3	ENSG00000049245	1	0	0
VAPA	ENSG00000101558	0	0	1
VARS	ENSG00000204394	0	0	1
VARS2	ENSG00000137411	0	1	0
VAT1	ENSG00000108828	0	1	0
VEGFC	ENSG00000150630	1	0	0
VHL	ENSG00000134086	1	0	0
VIM	ENSG00000026025	1	0	0
VIPR2	ENSG00000106018	0	0	1
VMAC	ENSG00000187650	0	1	0
VNN1	ENSG00000112299	1	0	0
VPS35	ENSG00000069329	0	1	0
VPS37C	ENSG00000167987	1	0	0
WDR1	ENSG00000071127	1	0	0
WDR45	ENSG00000196998	1	1	0
WDR73	ENSG00000177082	0	0	1
WDR76	ENSG00000092470	1	0	0
WDR90	ENSG00000161996	0	1	0
WEE1	ENSG00000166483	0	1	0
WIPF1	ENSG00000115935	1	0	0
WIPI1	ENSG00000070540	1	1	0
WISP1	ENSG00000104415	0	1	0
WNK4	ENSG00000126562	1	0	0
WNT5A	ENSG00000114251	1	0	0
WNT7A	ENSG00000154764	0	1	0
WNT7B	ENSG00000188064	0	1	0
WTIP	ENSG00000142279	0	1	0
XRCC6	ENSG00000196419	0	0	1
YAP1	ENSG00000137693	0	1	0
YIPF3	ENSG00000137207	0	1	0
YKT6	ENSG00000106636	1	1	0
YPEL5	ENSG00000119801	0	1	0
YWHAG	ENSG00000170027	0	1	0
ZC3H12A	ENSG00000163874	1	0	0
ZCCHC8	ENSG00000033030	1	0	0
ZDHHC9	ENSG00000188706	0	0	1
ZFYVE21	ENSG00000100711	0	1	0
ZHX3	ENSG00000174306	0	0	1
ZMIZ1	ENSG00000108175	0	1	0
ZMYM2	ENSG00000121741	0	0	1
ZNF260	ENSG00000178042	0	1	0
ZNF35	ENSG00000169981	0	1	0
ZNF358	ENSG00000198816	0	1	0
ZNF628	ENSG00000197483	0	0	1
ZNF672	ENSG00000171161	1	0	0
ZNF697	ENSG00000143067	1	0	0
ZNRF2	ENSG00000180233	0	0	1
ZWILCH	ENSG00000174442	1	0	0
ZYX	ENSG00000159840	1	0	0
